# Supplementary material
Source: publisher figshare collection journal article supplement (https://gsapubs.figshare.com/articles/dataset/_/14471031)
Supplement: Supplementary file 1 [file 2]

## Sheet: A. Ten Mile, UT
	A. Ten Mile Graben, UT
						UT15-TM-1Jsv															UT15-TM-3Jmt															UT15-TM-Jsw
				Isotope ratios						Apparent ages (Ma)
																			Isotope ratios						Apparent ages (Ma)									Isotope ratios						Apparent ages (Ma)
	206Pb*	±	207Pb*	±	206Pb*	±	error	206Pb*	±	207Pb*	±	206Pb*	±
	207Pb*	(%)	235U*	(%)	238U	(%)	corr.	238U*	(Ma)	235U	(Ma)	207Pb*	(Ma)			206Pb*	±	207Pb*	±	206Pb*	±	error	206Pb*	±	207Pb*	±	206Pb*	±			206Pb*	±	207Pb*	±	206Pb*	±	error	206Pb*	±	207Pb*	±	206Pb*	±
																207Pb*	(%)	235U*	(%)	238U	(%)	corr.	238U*	(Ma)	235U	(Ma)	207Pb*	(Ma)			207Pb*	(%)	235U*	(%)	238U	(%)	corr.	238U*	(Ma)	235U	(Ma)	207Pb*	(Ma)
	20.8219	1.32859	0.157511	3.00833	0.0237967	2.69905	0.897193	151.607	4.0442	148.522	4.15664	100.596	31.4313
	20.6039	1.45059	0.160039	3.11965	0.0239256	2.76188	0.885319	152.418	4.16023	150.737	4.3701	125.384	34.1472			20.3227	1.23061	0.163267	2.71702	0.0240751	2.42235	0.891548	153.359	3.67106	153.559	3.87208	157.65	28.779			20.8499	1.58702	0.171514	3.47187	0.0259472	3.08793	0.889412	165.133	5.03444	160.732	5.16118	97.3656	37.5445
	20.409	1.18039	0.166747	2.87114	0.0246927	2.61728	0.911581	157.246	4.06576	156.592	4.16648	147.737	27.6768			19.7874	1.06853	0.176375	2.25662	0.025323	1.9876	0.880787	161.21	3.16447	164.937	3.43543	219.76	24.7218			20.3611	1.22056	0.176005	3.1634	0.0260025	2.91845	0.922567	165.481	4.76802	164.617	4.80733	153.219	28.5897
	20.1515	1.22192	0.178594	1.97044	0.0261132	1.54581	0.784502	166.176	2.53595	166.85	3.03176	177.403	28.4902			21.174	2.42654	0.169966	3.1952	0.0261128	2.07875	0.650586	166.174	3.41019	159.39	4.71324	60.7544	57.8139			20.2008	1.23845	0.178441	3.29434	0.0261547	3.0527	0.926647	166.437	5.01578	166.718	5.06511	171.706	28.9007
	19.9797	1.54751	0.223885	3.42869	0.0324566	3.05959	0.892351	205.905	6.2003	205.138	6.36866	197.338	35.9682			19.5607	1.16322	0.190756	2.29835	0.0270739	1.98225	0.862468	172.208	3.36841	177.274	3.73855	246.397	26.7644			20.2536	1.52401	0.178307	4.20088	0.0262034	3.91469	0.931873	166.743	6.44376	166.602	6.45484	165.607	35.601
	19.5444	1.40311	0.245819	3.69197	0.0348599	3.41496	0.924969	220.893	7.41565	223.174	7.39702	248.295	32.3224			19.4403	1.00618	0.250309	2.23146	0.0353076	1.99174	0.892571	223.681	4.37874	226.828	4.5361	260.598	23.1158			20.1181	1.39296	0.181331	3.429	0.0264696	3.13333	0.913772	168.415	5.20864	169.205	5.34444	181.27	32.4772
	19.2309	1.51949	0.28448	3.74544	0.0396954	3.42337	0.914011	250.945	8.42572	254.205	8.42301	285.367	34.7688			15.215	5.59972	0.329014	5.98026	0.0363224	2.09919	0.35102	229.997	4.74296	288.813	15.0337	797.592	117.48			20.4435	1.20071	0.181897	3.2564	0.0269818	3.02695	0.929539	171.63	5.12663	169.692	5.08883	143.78	28.1512
	19.2548	1.42554	0.341697	3.35798	0.0477385	3.04038	0.905418	300.622	8.93022	298.457	8.68373	282.573	32.6154			19.8373	2.00582	0.266025	2.77843	0.0382906	1.92259	0.691969	242.229	4.57065	239.51	5.92808	213.967	46.488			19.9521	1.94791	0.190285	3.94791	0.0275475	3.4339	0.869801	175.18	5.93452	176.872	6.40851	200.578	45.2318
	19.0506	1.65851	0.357541	3.04744	0.0494222	2.5566	0.838935	310.973	7.76164	310.377	8.14981	306.891	37.7798			19.2135	1.15628	0.289076	2.26762	0.0403	1.95067	0.860229	254.692	4.87135	257.832	5.16342	287.489	26.4173			20.4183	1.42937	0.188274	3.28717	0.0278931	2.96013	0.900511	177.348	5.17819	175.155	5.28846	146.691	33.5112
	19.2042	1.74719	0.360343	3.30049	0.050211	2.8001	0.84839	315.817	8.63006	312.471	8.87741	288.568	39.9374			19.0536	1.09393	0.293049	3.27198	0.040514	3.08369	0.942455	256.018	7.7401	260.957	7.52964	306.545	24.9137			19.9121	1.12664	0.193245	3.41761	0.0279198	3.22657	0.944101	177.516	5.64952	179.394	5.61997	205.211	26.1391
	17.9988	1.25212	0.389779	3.5777	0.0509038	3.35144	0.936758	320.068	10.4649	334.208	10.1888	434.778	27.9072			19.2778	1.11376	0.30293	2.58311	0.0423729	2.33066	0.90227	267.524	6.10748	268.686	6.09815	279.838	25.4998			20.0071	1.58587	0.196714	3.91062	0.0285568	3.57463	0.914082	181.509	6.39779	182.342	6.52721	194.186	36.8548
	19.1837	1.12484	0.374508	3.05403	0.0521292	2.83933	0.929701	327.58	9.06873	322.989	8.44941	290.991	25.6887			19.0728	1.20802	0.327303	3.609	0.0452954	3.40082	0.942316	285.573	9.49986	287.505	9.03668	304.255	27.5085			20.1359	2.07527	0.208677	3.58143	0.0304884	2.91889	0.815007	193.604	5.56708	192.442	6.27852	179.207	48.3937
	18.7655	1.27786	0.394866	2.96627	0.0537646	2.67691	0.902449	337.593	8.8045	337.918	8.52644	341.161	28.91			18.8788	1.21885	0.372605	2.55192	0.0510401	2.24203	0.878567	320.904	7.01863	321.583	7.03407	327.469	27.664			21.5668	6.16801	0.195152	6.7313	0.0305384	2.69555	0.400451	193.917	5.1493	181.016	11.1608	16.7558	148.299
	17.2837	2.44299	0.438683	3.62867	0.0550143	2.68311	0.739419	345.233	9.01933	369.323	11.2352	524.365	53.5908			18.2531	1.30696	0.392028	2.66144	0.0519209	2.31843	0.871118	326.304	7.37686	335.85	7.61068	403.44	29.2676			21.9645	2.25458	0.193351	3.79822	0.0308145	3.05668	0.804768	195.644	5.89038	179.484	6.24875	NA	NA
	18.6472	1.14534	0.40688	3.23131	0.0550513	3.02152	0.935074	345.459	10.1634	346.626	9.48922	355.454	25.8442			18.8624	1.64861	0.389698	2.84273	0.0533352	2.31586	0.81466	334.965	7.55923	334.149	8.09436	329.447	37.3908			19.3555	1.23985	0.274578	2.84426	0.0385619	2.5598	0.899988	243.913	6.12704	246.347	6.22163	270.582	28.4203
	18.8165	1.03594	0.416005	2.92973	0.0567968	2.74046	0.935398	356.116	9.49456	353.19	8.7398	334.984	23.4588			18.6869	1.05147	0.396223	2.95347	0.0537236	2.75996	0.934481	337.342	9.0711	338.905	8.51054	350.613	23.7659			19.3024	1.42364	0.289624	3.61677	0.0405633	3.32479	0.919272	256.323	8.35502	258.263	8.24767	276.926	32.613
	18.7306	1.10643	0.420729	3.04448	0.0571797	2.83631	0.931624	358.451	9.8893	356.572	9.15474	345.365	25.01			18.8503	0.805303	0.393843	2.66959	0.0538678	2.54523	0.953416	338.224	8.38665	337.173	7.65936	330.94	18.267			19.7611	1.99593	0.304449	3.52887	0.0436529	2.91019	0.82468	275.436	7.84687	269.869	8.36301	222.864	46.1624
	17.8061	2.32744	0.444579	3.61449	0.0574389	2.76542	0.765093	360.031	9.68344	373.476	11.2954	458.718	51.6339			18.7297	0.837204	0.4107	2.46306	0.0558141	2.31641	0.94046	350.119	7.89388	349.379	7.28119	345.429	18.9401			19.3031	1.19887	0.325166	2.93259	0.0455429	2.67635	0.912621	287.099	7.51518	285.869	7.30675	276.838	27.4509
	18.7814	1.55699	0.424626	3.24653	0.0578659	2.84881	0.877495	362.634	10.0456	359.353	9.82581	339.19	35.2647			18.5071	1.20904	0.426946	2.9875	0.0573323	2.73192	0.91445	359.381	9.54934	361.006	9.07642	372.42	27.2187			18.6877	1.21056	0.374658	3.38706	0.0508018	3.16334	0.933948	319.443	9.85878	323.1	9.37358	350.538	27.3506
	18.7111	1.05413	0.437849	2.87255	0.0594444	2.67214	0.930234	372.246	9.66521	368.734	8.88218	347.713	23.838			18.1595	0.850511	0.443259	2.45744	0.0584048	2.30557	0.938199	365.917	8.2015	372.548	7.66362	414.946	19.0071			19.1995	1.50838	0.369422	3.45588	0.0514637	3.10932	0.89972	323.502	9.81049	319.225	9.46643	289.143	34.4722
	18.3055	0.951624	0.475924	2.46325	0.0632129	2.27201	0.922362	395.136	8.70792	395.273	8.06533	397.03	21.3336			18.29	1.19251	0.45039	2.18296	0.059771	1.82845	0.837601	374.233	6.64782	377.552	6.88312	398.917	26.7251			20.0792	3.49495	0.359436	4.52408	0.0523666	2.87275	0.63499	329.035	9.21518	311.793	12.1463	185.781	81.3941
	18.1241	1.35421	0.482329	3.31969	0.0634291	3.03092	0.913012	396.446	11.6539	399.67	10.9684	419.303	30.2414			18.2928	0.983214	0.452019	2.46107	0.0599963	2.25614	0.916731	375.603	8.23199	378.692	7.77943	398.581	22.036			19.2858	1.44971	0.377141	2.97905	0.0527751	2.60252	0.873605	331.537	8.41018	324.933	8.28407	278.896	33.1695
	18.474	1.19847	0.478518	3.01159	0.0641428	2.76285	0.917406	400.771	10.7355	397.056	9.89716	376.44	26.9431			18.1119	0.872216	0.468698	2.41072	0.061595	2.2474	0.932253	385.318	8.40594	390.289	7.81172	420.806	19.472			18.5086	1.20528	0.398596	2.35357	0.0535298	2.02153	0.858921	336.156	6.62134	340.629	6.81088	372.228	27.1396
	17.8393	1.24493	0.498972	2.65878	0.0645864	2.34932	0.883606	403.458	9.18798	411.006	8.98683	454.608	27.6518			18.2476	0.996804	0.466146	2.26072	0.0617187	2.02909	0.897544	386.069	7.60374	388.523	7.29841	404.118	22.3188			19.8156	3.01764	0.379901	4.17213	0.0546218	2.88106	0.690549	342.834	9.61923	326.965	11.6635	216.468	69.8589
	18.1355	1.24488	0.495423	3.21935	0.0651921	2.96892	0.922212	407.124	11.7134	408.6	10.83	417.897	27.8069			18.2317	0.949423	0.469765	2.62419	0.0621434	2.44642	0.932257	388.647	9.22702	391.027	8.51664	406.076	21.2508			18.536	1.63748	0.413896	3.48929	0.0556665	3.0812	0.883045	349.218	10.4738	351.677	10.3718	368.907	36.8759
	17.8306	1.0589	0.506056	2.88448	0.0654715	2.68309	0.93018	408.815	10.6283	415.793	9.84165	455.648	23.4973			17.3348	1.50333	0.496537	3.57339	0.0624536	3.24178	0.9072	390.53	12.2843	409.355	12.0391	517.891	32.9894			18.1807	1.24556	0.436756	3.4605	0.0576152	3.22857	0.932977	361.106	11.338	367.963	10.6817	412.34	27.8487
	18.4733	1.06865	0.488497	2.88982	0.065478	2.68497	0.929113	408.854	10.6367	403.886	9.63003	376.527	24.0435			18.362	1.22845	0.481104	3.27192	0.0640984	3.03255	0.926841	400.502	11.7758	398.83	10.792	390.109	27.5739			18.3859	1.17331	0.433507	3.45057	0.057832	3.24496	0.940413	362.427	11.4361	365.664	10.5958	387.194	26.3493
	17.734	1.14819	0.514416	4.08789	0.0661927	3.92333	0.959744	413.177	15.7018	421.415	14.1002	467.691	25.4314			18.1047	0.804796	0.489075	2.28759	0.0642472	2.14135	0.936072	401.403	8.3333	404.28	7.62913	421.698	17.9645			18.5904	1.2226	0.429983	3.19177	0.0580001	2.94833	0.923729	363.451	10.4193	363.164	9.7453	362.291	27.5659
	18.9152	1.22462	0.483023	3.04235	0.0662929	2.78499	0.915409	413.783	11.1618	400.145	10.0617	323.138	27.8271			17.8552	1.28818	0.499379	2.80662	0.0646966	2.49353	0.888448	404.125	9.76764	411.282	9.49172	452.594	28.6009			18.2766	3.12051	0.439021	4.30444	0.0582194	2.9649	0.688801	364.788	10.5153	369.562	13.3349	400.567	69.9304
	18.2377	1.25459	0.501299	2.57234	0.0663367	2.24566	0.873	414.048	9.00578	412.581	8.72167	405.341	28.0851			18.4173	1.11684	0.485426	2.90654	0.0648691	2.6834	0.923229	405.17	10.5377	401.789	9.64475	383.352	25.0975			19.2971	1.62138	0.419191	3.8071	0.0586939	3.44458	0.904779	367.677	12.3106	355.472	11.4186	277.547	37.117
	18.2747	1.25068	0.5034	2.70029	0.06675	2.39319	0.886272	416.546	9.6535	414.002	9.18102	400.798	28.0196			18.2895	1.2207	0.48986	3.65637	0.0650072	3.44658	0.942624	406.005	13.5618	404.815	12.2075	398.981	27.3569			18.0116	1.31413	0.453455	3.02472	0.0592616	2.72433	0.900689	371.133	9.82535	379.696	9.58208	433.198	29.2967
	18.4923	0.861218	0.500517	3.16179	0.0671578	3.04223	0.962189	419.01	12.3418	412.052	10.7092	374.222	19.3843			19.2352	2.32183	0.465872	3.35063	0.0650206	2.41574	0.720981	406.086	9.50739	388.334	10.8129	284.879	53.1024			18.5532	1.39631	0.441359	2.84992	0.0594154	2.48442	0.871752	372.069	8.98208	371.21	8.86123	366.811	31.4536
	17.9761	1.17139	0.515935	3.1632	0.0672945	2.93831	0.928905	419.835	11.9429	422.432	10.9317	437.581	26.0966			18.2247	0.945764	0.492177	2.04482	0.0650831	1.81296	0.88661	406.465	7.14152	406.393	6.84844	406.938	21.165			18.7454	1.11331	0.437969	3.32927	0.0595698	3.1376	0.942431	373.009	11.3714	368.82	10.2965	343.546	25.1957
	18.4782	1.22933	0.512256	2.99441	0.0686807	2.73043	0.911842	428.202	11.3119	419.965	10.2995	375.934	27.662			17.7522	0.969351	0.506069	3.36311	0.0651852	3.22039	0.957561	407.083	12.7043	415.802	11.4751	465.424	21.4948			18.1267	1.8444	0.45492	3.96415	0.0598331	3.50894	0.885169	374.61	12.7702	380.718	12.5863	418.984	41.1921
	18.1412	1.37188	0.524733	3.69953	0.0690705	3.43577	0.928702	430.553	14.3096	428.308	12.9284	417.199	30.6475			18.0668	1.08963	0.49878	2.849	0.0653849	2.63239	0.923972	408.291	10.4146	410.876	9.62733	426.374	24.3027			17.8862	1.55426	0.476158	3.84559	0.0617955	3.5175	0.914685	386.535	13.1968	395.433	12.596	448.737	34.554
	17.6349	1.15956	0.541327	2.80088	0.0692659	2.54958	0.910278	431.732	10.6469	439.299	9.98857	480.092	25.6166			18.3759	0.905171	0.492504	2.21916	0.0656668	2.02616	0.913032	409.997	8.04855	406.616	7.43569	388.414	20.3225			18.5055	1.33092	0.467757	3.96107	0.0628073	3.73079	0.941862	392.675	14.2126	389.638	12.8184	372.606	29.945
	17.9461	1.18236	0.533173	3.48547	0.0694268	3.2788	0.940705	432.701	13.7218	433.913	12.3081	441.298	26.304			18.2293	1.07077	0.498136	3.06112	0.0658878	2.86774	0.936826	411.333	11.4275	410.44	10.3353	406.369	23.9655			19.3835	1.74223	0.447156	3.62205	0.0628898	3.17551	0.876717	393.176	12.1122	375.286	11.3644	267.31	39.9725
	15.3192	1.61021	0.630842	2.85311	0.0701203	2.3553	0.825521	436.881	9.94894	496.621	11.2066	783.28	33.8512			18.1137	1.08424	0.504389	2.55263	0.0662921	2.31092	0.905309	413.778	9.26164	414.669	8.69027	420.582	24.207			18.6246	1.13022	0.470457	2.7993	0.0635763	2.56099	0.914869	397.338	9.86854	391.505	9.09407	358.148	25.4903
	18.1166	1.21596	0.537258	3.28434	0.0706231	3.05095	0.92894	439.909	12.9737	436.615	11.6555	420.23	27.1497			17.6307	0.841331	0.519034	2.68493	0.0663976	2.54971	0.949637	414.415	10.2339	424.506	9.31544	480.616	18.5888			18.1394	1.05622	0.484257	2.89961	0.0637361	2.7004	0.931296	398.307	10.4303	400.989	9.60615	417.426	23.5941
	18.6064	1.17222	0.524732	3.66207	0.0708413	3.46939	0.947384	441.222	14.7956	428.307	12.7974	360.36	26.4366			17.9861	1.08103	0.510801	2.51483	0.0666619	2.27062	0.902894	416.013	9.14776	418.988	8.63363	436.344	24.0695			18.6101	1.08958	0.473047	2.85893	0.0638765	2.64316	0.924528	399.158	10.2304	393.292	9.32251	359.905	24.5761
	17.9609	0.917733	0.549961	3.49514	0.0716717	3.3725	0.964912	446.219	14.5398	444.971	12.593	439.47	20.4422			17.1338	1.3887	0.537993	3.16542	0.0668834	2.84454	0.898629	417.352	11.4956	437.101	11.2435	543.451	30.3509			18.1581	1.18997	0.484938	3.16441	0.0638919	2.93214	0.9266	399.251	11.3515	401.455	10.4934	415.113	26.5922
	17.9105	1.33333	0.553321	3.50084	0.0719073	3.23699	0.924632	447.636	13.9983	447.17	12.6631	445.717	29.6561			18.6543	0.919745	0.49423	2.02234	0.0668954	1.80109	0.890597	417.424	7.27995	407.789	6.79206	354.548	20.7572			18.0928	1.62263	0.488585	3.26888	0.0641407	2.83772	0.868102	400.758	11.0261	403.946	10.8946	423.167	36.2191
	17.2111	1.4665	0.577198	3.26839	0.072081	2.92091	0.893686	448.681	12.6599	462.659	12.1457	533.622	32.121			17.8636	1.19124	0.518114	2.58122	0.0671557	2.28991	0.88714	418.997	9.28948	423.891	8.94515	451.54	26.4526			18.3439	1.12532	0.484421	3.00967	0.0644767	2.79137	0.927468	402.794	10.8994	401.101	9.97306	392.321	25.2487
	15.8263	1.77038	0.633524	2.9057	0.0727496	2.30409	0.792956	452.7	10.0728	498.289	11.4429	714.497	37.6061			18.0248	1.24148	0.515514	2.54492	0.0674217	2.22156	0.87294	420.603	9.04567	422.15	8.79014	431.557	27.6802			18.2912	0.982752	0.487238	3.08142	0.0646652	2.92051	0.947779	403.935	11.435	403.027	10.2508	398.778	22.0249
	17.0341	1.35173	0.588713	2.60603	0.0727629	2.22805	0.85496	452.78	9.74202	470.045	9.80573	556.226	29.4839			18.4632	0.906208	0.503764	2.83068	0.0674872	2.68171	0.947371	420.999	10.9292	414.247	9.62901	377.765	20.3838			18.3277	0.946685	0.487842	3.2016	0.0648746	3.05844	0.955284	405.202	12.0114	403.439	10.6595	394.309	21.2336
	17.1849	1.40435	0.587182	2.79078	0.0732163	2.41169	0.864164	455.504	10.6062	469.067	10.4838	536.961	30.7495			18.0439	1.07073	0.516729	2.73401	0.0676521	2.51561	0.92012	421.995	10.2758	422.964	9.45794	429.197	23.8694			17.8724	1.24578	0.501509	3.20857	0.0650354	2.95685	0.921547	406.176	11.6395	412.723	10.882	450.447	27.6704
	16.8577	1.43778	0.600722	3.32767	0.0734785	3.00103	0.901841	457.079	13.2421	477.692	12.6809	578.877	31.2416			18.6055	1.01901	0.505218	2.50739	0.0682037	2.29098	0.913694	425.325	9.42963	415.228	8.54557	360.463	22.9702			17.1909	2.01615	0.522937	3.73617	0.0652281	3.14549	0.841901	407.342	12.4165	427.111	13.0271	536.208	44.1404
	17.5407	0.826236	0.596075	2.24091	0.0758642	2.08303	0.929546	471.389	9.46874	474.74	8.4979	491.947	18.2221			18.1332	0.798403	0.521903	2.42567	0.0686676	2.29051	0.944279	428.124	9.48768	426.422	8.44646	418.185	17.8324			17.9688	1.47115	0.501589	3.46282	0.0653965	3.13478	0.905268	408.361	12.4042	412.777	11.7456	438.492	32.7613
	17.0169	1.17942	0.680164	3.46428	0.0839813	3.25733	0.940262	519.843	16.2683	526.874	14.2408	558.403	25.695			17.7175	1.20626	0.537208	3.22643	0.0690612	2.99246	0.927483	430.497	12.4617	436.582	11.4494	469.745	26.7244			18.3048	1.36238	0.495311	3.38095	0.0657854	3.09431	0.915218	410.714	12.3124	408.523	11.3719	397.114	30.5425
	17.2538	1.36339	0.683521	2.98088	0.0855707	2.65081	0.889273	529.288	13.4699	528.9	12.2893	528.202	29.8943			17.6565	0.731122	0.542741	2.40587	0.0695323	2.29209	0.952707	433.337	9.60601	440.23	8.59434	477.376	16.1845			18.1439	1.00196	0.500684	3.31301	0.0659146	3.15787	0.953171	411.496	12.5884	412.165	11.2239	416.87	22.3844
	17.3825	1.03648	0.681489	3.10117	0.0859526	2.92283	0.942495	531.556	14.9132	527.674	12.7627	511.888	22.7912			17.775	1.04817	0.541971	2.61704	0.0698993	2.39797	0.91629	435.549	10.0993	439.723	9.34013	462.622	23.2406			18.3093	1.6005	0.501887	3.36553	0.0666753	2.9606	0.879685	416.094	11.9298	412.979	11.4201	396.559	35.8849
	17.0391	0.965591	0.701058	3.2451	0.0866741	3.09811	0.954705	535.837	15.9296	539.423	13.5806	555.577	21.0462			18.0771	0.978873	0.545341	2.41666	0.0715293	2.20954	0.914294	445.363	9.50823	441.94	8.65964	425.107	21.8376			18.3429	1.69996	0.502135	3.84294	0.0668307	3.44649	0.896838	417.033	13.918	413.147	13.0445	392.449	38.1366
	17.009	1.38962	0.71591	3.21166	0.0883536	2.89546	0.901547	545.793	15.1527	548.25	13.6066	559.401	30.2804			17.8618	1.03662	0.563874	2.81242	0.0730793	2.6144	0.929593	454.681	11.4777	454.045	10.2969	451.769	23.0344			18.5163	1.3475	0.497808	3.85975	0.0668813	3.6169	0.93708	417.339	14.6165	410.218	13.0262	371.297	30.3238
	16.9542	1.03284	0.718275	2.62007	0.0883601	2.40791	0.919024	545.831	12.6021	549.648	11.1214	566.467	22.4887			17.8185	0.923764	0.565521	2.71916	0.0731152	2.55744	0.940525	454.896	11.2327	455.114	9.97398	457.157	20.493			18.249	1.51269	0.505781	3.71604	0.0669716	3.39422	0.913396	417.884	13.734	415.608	12.6746	403.944	33.8716
	17.107	1.04888	0.712862	3.09931	0.0884845	2.91643	0.940993	546.568	15.2832	546.444	13.0979	546.858	22.9356			17.6263	1.01203	0.576169	2.72856	0.0736882	2.53394	0.928672	458.338	11.2107	461.996	10.128	481.167	22.3696			18.1972	1.28889	0.507477	2.71106	0.067005	2.38508	0.87976	418.087	9.65523	416.751	9.26715	410.316	28.8275
	16.901	0.960148	0.752025	2.71442	0.0922214	2.53893	0.935351	568.661	13.8194	569.399	11.8309	573.311	20.8863			17.5608	0.90887	0.587447	3.03709	0.0748517	2.89791	0.954173	465.32	13.0094	469.236	11.4124	489.407	20.0543			18.2053	1.30248	0.507655	3.02252	0.0670586	2.72748	0.902387	418.41	11.0496	416.871	10.3343	409.312	29.1371
	17.2721	1.13301	0.736023	2.9645	0.092241	2.73944	0.924082	568.777	14.9137	560.082	12.7626	525.841	24.8293			17.8446	1.02861	0.595126	2.64485	0.0770554	2.43663	0.921276	478.523	11.2376	474.136	10.0198	453.953	22.8337			18.6783	1.38453	0.494997	2.91927	0.0670853	2.57006	0.880378	418.571	10.4157	408.31	9.81475	351.65	31.2662
	17.2243	1.03835	0.740548	3.06942	0.0925512	2.88845	0.941042	570.608	15.7734	562.725	13.2611	531.956	22.7352			16.5309	0.776118	0.674807	2.19941	0.0809403	2.05793	0.93567	501.733	9.93371	523.631	8.99835	621.221	16.7651			17.902	1.19669	0.517736	3.2943	0.0672509	3.06926	0.931687	419.572	12.4676	423.638	11.411	446.771	26.61
	15.9637	1.06035	0.812941	2.83382	0.094163	2.62796	0.927357	580.111	14.5793	604.102	12.9033	696.11	22.5953			17.3163	0.850359	0.651869	2.69714	0.0819038	2.55958	0.948998	507.476	12.4912	509.629	10.8077	520.231	18.6483			18.8246	1.7874	0.493646	3.33992	0.0674264	2.82139	0.844748	420.632	11.4888	407.392	11.2086	334.018	40.506
	17.2016	1.14701	0.7553	2.68457	0.0942704	2.4272	0.904129	580.743	13.4795	571.295	11.7299	534.819	25.0887			17.4417	0.961562	0.667662	2.30185	0.0844954	2.09139	0.908569	522.9	10.5041	519.29	9.35767	504.421	21.1378			18.0527	1.29515	0.516124	3.75675	0.0676056	3.52644	0.938693	421.714	14.3955	422.559	12.9863	428.119	28.8782
	16.9385	1.46401	0.768543	3.4513	0.0944562	3.12541	0.905573	581.838	17.3883	578.927	15.2299	568.488	31.8673			16.7282	1.41853	0.709872	2.6213	0.0861621	2.20431	0.840923	532.799	11.2723	544.67	11.0504	595.599	30.7362			18.05	1.31382	0.518524	3.04238	0.0679099	2.74408	0.901951	423.551	11.249	424.165	10.5489	428.451	29.3122
	17.0081	1.12839	0.775485	3.0285	0.0957012	2.81044	0.927996	589.167	15.8241	582.905	13.432	559.539	24.5799			16.6879	1.10977	0.715502	2.85756	0.0866364	2.63327	0.921507	535.613	13.5341	548.008	12.1023	600.8	24.0032			17.6878	1.23549	0.530383	3.81524	0.0680692	3.60966	0.946115	424.513	14.8298	432.064	13.4266	473.494	27.3528
	16.7544	1.445	0.807351	3.18179	0.0981474	2.83474	0.890927	603.543	16.3324	600.967	14.4328	592.226	31.324			16.9832	1.37675	0.706409	3.09219	0.0870488	2.76879	0.895414	538.06	14.293	542.612	12.9985	562.708	29.9762			18.3722	1.11825	0.511035	3.28252	0.068124	3.08617	0.940184	424.843	12.6887	419.145	11.2728	388.864	25.1054
	16.6298	1.09224	0.815313	2.93926	0.0983784	2.72879	0.928392	604.899	15.7557	605.43	13.405	608.339	23.6158			17.1769	0.920329	0.70749	2.39383	0.0881763	2.20985	0.923142	544.742	11.5434	543.255	10.0716	537.967	20.1538			17.4316	1.3574	0.541231	3.2448	0.0684553	2.94723	0.908295	426.843	12.1726	439.236	11.5705	505.656	29.8674
	16.6478	1.24034	0.815858	3.19311	0.0985508	2.94237	0.921473	605.91	17.0159	605.735	14.5682	606.001	26.8368			17.0335	1.40469	0.729988	3.31474	0.0902209	3.00239	0.90577	556.843	16.0169	556.546	14.203	556.298	30.6501			18.4458	1.11905	0.514854	2.66908	0.0689081	2.42316	0.907865	429.574	10.07	421.708	9.21121	379.878	25.1458
	16.7603	1.19968	0.82349	3.2248	0.100145	2.99334	0.928226	615.256	17.5652	609.994	14.7883	591.443	26.0127			15.7083	1.67542	0.794678	3.12166	0.0905749	2.63396	0.843768	558.936	14.102	593.822	14.0362	730.396	35.4841			18.0946	1.23482	0.529981	3.8461	0.069582	3.64249	0.94706	433.637	15.2757	431.797	13.5285	422.944	27.5571
	14.5025	1.86433	0.95402	3.17575	0.100389	2.57092	0.80955	616.689	15.1199	680.194	15.7449	897.337	38.4757			16.5538	0.908759	0.755923	2.35331	0.0907949	2.17076	0.922431	560.237	11.6479	571.655	10.2872	618.244	19.6213			17.8914	1.32247	0.537538	3.77051	0.0697819	3.53098	0.936472	434.841	14.8478	436.8	13.3856	448.085	29.3852
	16.422	1.28597	0.843412	2.60606	0.100497	2.26667	0.869771	617.323	13.3436	621.027	12.1074	635.506	27.6788			17.5299	1.96967	0.714104	3.51296	0.0908296	2.90883	0.828027	560.442	15.6138	547.18	14.8614	493.294	43.4404			18.2797	1.20469	0.526609	3.17714	0.0698467	2.93989	0.925326	435.232	12.373	429.557	11.1287	400.181	26.9924
	16.7248	1.1336	0.830924	2.76851	0.100835	2.52578	0.912327	619.299	14.9143	614.125	12.7582	596.023	24.5603			16.8559	0.75519	0.744474	2.04124	0.0910517	1.8964	0.929045	561.754	10.2021	565.013	8.84543	579.12	16.4261			18.0978	1.40282	0.536235	3.26854	0.0704155	2.95219	0.903215	438.658	12.5193	435.939	11.5851	422.552	31.3309
	16.3519	1.38879	0.850911	3.60427	0.100958	3.32596	0.922783	620.019	19.661	625.149	16.8262	644.711	29.858			16.6319	1.08952	0.757412	3.31877	0.0914035	3.13483	0.944577	563.832	16.9243	572.516	14.5243	608.067	23.558			18.0083	1.16001	0.542299	3.12138	0.0708596	2.89783	0.928379	441.332	12.3611	439.939	11.1446	433.607	25.8504
	16.2117	1.50141	0.858964	3.47143	0.10104	3.12995	0.901632	620.499	18.516	629.557	16.2884	663.142	32.1516			16.8095	1.03207	0.753358	2.43646	0.0918849	2.20707	0.905852	566.675	11.973	570.171	10.6301	585.099	22.4015			18.274	1.30833	0.540831	3.74038	0.0717105	3.5041	0.93683	446.453	15.1147	438.972	13.3314	400.884	29.3108
	16.5911	1.15866	0.839764	3.46963	0.101093	3.27045	0.942593	620.812	19.3564	619.016	16.0822	613.372	25.0302			17.6488	3.63281	0.717925	4.46725	0.0919354	2.59981	0.581971	566.973	14.1106	549.441	18.9581	478.34	80.3273			17.8118	1.18097	0.556021	2.7324	0.0718598	2.464	0.901774	447.351	10.649	448.934	9.91434	458.007	26.2164
	12.9063	4.16492	1.08291	6.49037	0.101411	4.97779	0.76695	622.671	29.5456	745.056	34.2757	1133.59	82.9213			16.5	0.911984	0.780786	2.459	0.0934767	2.28363	0.928682	576.066	12.5846	585.932	10.9478	625.262	19.6838			18.1165	1.27019	0.553174	2.91866	0.072715	2.62777	0.900335	452.492	11.4827	447.073	10.5553	420.239	28.3603
	16.2093	1.12768	0.866435	3.69824	0.101903	3.52212	0.952377	625.554	20.9976	633.63	17.4337	663.457	24.1554			16.9014	1.07013	0.765517	3.19723	0.0938783	3.01282	0.942323	578.433	16.6682	577.188	14.0771	573.255	23.2647			18.0403	2.14584	0.56004	3.86549	0.0733078	3.21518	0.831765	456.053	14.1563	451.553	14.0911	429.649	47.8367
	17.0114	1.31776	0.831359	3.7521	0.102617	3.51308	0.936298	629.724	21.0766	614.366	17.2966	559.127	28.7284			13.9802	4.98053	0.926026	5.5771	0.0939344	2.50964	0.449991	578.764	13.892	665.542	27.2335	972.569	101.646			17.8268	1.27789	0.570184	2.77833	0.0737523	2.46701	0.887946	458.723	10.9235	458.134	10.2446	456.148	28.3764
	16.5762	1.52395	0.854094	3.27818	0.102726	2.90242	0.885376	630.363	17.4298	626.893	15.3345	615.316	32.9236			17.5203	1.42953	0.745868	2.79416	0.0948183	2.40079	0.859216	583.971	13.4037	565.824	12.1214	494.497	31.5114			18.5433	1.41656	0.560714	2.93736	0.0754424	2.57321	0.87603	468.861	11.6365	451.991	10.7157	368.017	31.902
	16.2051	1.38655	0.874698	3.42622	0.102848	3.13313	0.914455	631.079	18.8356	638.115	16.2334	664.063	29.7022			15.8175	1.26479	0.82679	3.30524	0.0948902	3.05368	0.923889	584.394	17.0605	611.829	15.1905	715.674	26.8507			18.3933	1.81119	0.571555	3.37254	0.0762792	2.84492	0.843556	473.875	12.9978	459.02	12.4548	386.283	40.6729
	16.7112	0.904295	0.85002	2.47972	0.103068	2.30896	0.931134	632.365	13.9077	624.66	11.5692	597.781	19.5773			16.7429	1.08714	0.784082	2.52541	0.0952533	2.27943	0.9026	586.531	12.7794	587.809	11.27	593.713	23.5427			16.905	1.42474	0.623941	2.73301	0.0765328	2.33227	0.853369	475.394	10.6885	492.315	10.6625	572.763	30.9765
	16.4133	1.06746	0.873712	2.59703	0.104052	2.3675	0.911621	638.112	14.3837	637.581	12.2968	636.654	22.9712			16.3274	1.34005	0.80939	2.66435	0.0958878	2.30282	0.864311	590.264	12.989	602.112	12.1023	647.929	28.7963			15.8969	1.47863	0.706322	3.69391	0.081471	3.38506	0.916389	504.897	16.4389	542.56	15.5272	705.054	31.463
	15.9326	1.89072	0.903088	3.58482	0.104401	3.04566	0.849601	640.15	18.5601	653.376	17.2747	700.232	40.2641			16.903	1.08963	0.781851	2.558	0.0958906	2.31432	0.904737	590.281	13.0542	586.539	11.3973	573.008	23.6864			17.2315	1.31648	0.658734	3.41338	0.0823607	3.1493	0.922632	510.198	15.4483	513.839	13.765	531.044	28.8392
	15.7686	1.21777	0.987772	2.83535	0.113016	2.56051	0.903068	690.238	16.7604	697.583	14.3072	722.225	25.8392			17.8577	1.389	0.742829	2.4401	0.0962505	2.00618	0.822172	592.398	11.3549	564.055	10.5606	452.273	30.8624			17.308	0.974751	0.671584	2.62571	0.0843402	2.43807	0.92854	521.977	12.2246	521.675	10.7118	521.287	21.3774
	15.3839	1.20166	1.05291	3.29104	0.117529	3.06381	0.930957	716.327	20.7716	730.324	17.1406	774.414	25.2822			17.005	0.759665	0.781739	2.92017	0.0964556	2.81963	0.96557	593.604	15.99	586.475	13.0101	559.93	16.5412			17.307	1.1516	0.693336	3.74773	0.0870668	3.56641	0.951619	538.166	18.4139	534.803	15.5823	521.418	25.262
	14.4138	1.16832	1.4807	3.15613	0.154858	2.93192	0.928962	928.14	25.3442	922.517	19.1306	909.974	24.0641			17.211	1.53296	0.777796	3.33417	0.0971315	2.96087	0.888037	597.577	16.8982	584.225	14.8126	533.626	33.5659			17.0519	1.86458	0.709223	3.87271	0.0877494	3.39429	0.876464	542.213	17.6516	544.285	16.318	553.924	40.6991
	14.1644	1.42416	1.51853	3.60235	0.156067	3.30888	0.918534	934.88	28.7958	937.883	22.0577	945.838	29.1502			16.7855	1.32834	0.799148	3.09082	0.0973304	2.79082	0.902938	598.745	15.9574	596.348	13.9409	588.185	28.797			17.2744	1.16821	0.716041	3.41131	0.0897488	3.20504	0.939535	554.051	17.0159	548.327	14.4541	525.547	25.5957
	14.0157	1.09437	1.51558	3.32027	0.154128	3.13473	0.94412	924.06	26.9866	936.695	20.3143	967.401	22.3266			16.3304	1.05092	0.829204	2.55467	0.098253	2.3285	0.911468	604.163	13.4288	613.17	11.7593	647.536	22.5943			17.3919	1.14234	0.720556	3.61952	0.0909288	3.43452	0.94889	561.028	18.454	550.995	15.3926	510.695	25.1067
	13.7656	1.07597	1.69219	3.7377	0.169018	3.57949	0.95767	1006.7	33.3622	1005.59	23.8593	1004.04	21.8186			16.3761	1.22166	0.828586	2.70823	0.0984548	2.41703	0.892477	605.347	13.9655	612.827	12.4612	641.524	26.2737			16.9773	1.79067	0.753467	3.88315	0.0928153	3.44563	0.887329	572.166	18.8652	570.234	16.9442	563.466	39.0115
	13.752	1.01066	1.6892	2.63714	0.168553	2.43579	0.923649	1004.13	22.6489	1004.46	16.8213	1006.05	20.4988			17.1272	1.03184	0.79335	2.39011	0.0985913	2.1559	0.90201	606.148	12.4724	593.071	10.7365	544.295	22.5726			16.7753	1.28405	0.774385	2.96006	0.0942574	2.66706	0.901013	580.667	14.8097	582.275	13.1179	589.476	27.8303
	13.7486	1.18491	1.7007	2.98008	0.169658	2.73439	0.917555	1010.23	25.5679	1008.79	19.0572	1006.55	24.0206			16.4162	1.13681	0.831486	2.58647	0.099041	2.32325	0.898232	608.786	13.4964	614.436	11.9236	636.272	24.4683			17.1606	2.02831	0.758521	3.74376	0.0944471	3.1467	0.840518	581.785	17.5052	573.157	16.3982	540.059	44.3733
	13.7433	1.06352	1.77458	2.98158	0.17696	2.78546	0.934221	1050.35	26.998	1036.2	19.3655	1007.33	21.5689			16.551	1.04659	0.824995	3.10618	0.0990747	2.92455	0.941527	608.984	16.9947	610.831	14.2585	618.607	22.5997			16.8661	1.05506	0.772005	3.1492	0.0944765	2.96721	0.94221	581.958	16.5114	580.913	13.932	577.754	22.9296
	13.6897	1.19421	1.71032	3.56476	0.169886	3.35878	0.942217	1011.48	31.4425	1012.4	22.8449	1015.26	24.1781			16.9767	1.12689	0.810914	2.6278	0.0998883	2.37391	0.903384	613.754	13.8979	602.967	11.9487	563.545	24.5696			23.3983	13.3564	0.559969	13.6621	0.0950683	2.87396	0.21036	585.442	16.084	451.506	49.8362	NA	NA
	13.6828	0.892521	1.76726	2.82674	0.175455	2.68214	0.948845	1042.1	25.8084	1033.52	18.3322	1016.27	18.0808			16.5825	1.32738	0.83435	3.0221	0.100389	2.71499	0.898377	616.687	15.9671	616.023	13.9583	614.502	28.6699			17.6269	1.83563	0.743524	3.54927	0.0950951	3.03772	0.855872	585.6	17.0049	564.46	15.3698	481.09	40.5571
	13.6809	1.17985	1.75183	2.65462	0.173898	2.37802	0.895803	1033.55	22.709	1027.84	17.161	1016.56	23.8922			16.4092	1.13176	0.846903	2.32808	0.100834	2.03448	0.873884	619.297	12.0132	622.948	10.8401	637.189	24.3528			16.8274	1.02779	0.792303	2.776	0.0967379	2.57872	0.928935	595.263	14.6628	592.477	12.4609	582.765	22.3173
	13.6531	1.05112	1.78898	2.84392	0.177225	2.64254	0.92919	1051.79	25.6453	1041.45	18.5249	1020.68	21.2801			16.6085	1.03131	0.837357	2.73029	0.100909	2.52802	0.925916	619.732	14.9374	617.686	12.6351	611.116	22.3003			16.4591	1.35929	0.815886	3.40291	0.0974367	3.11963	0.916756	599.369	17.8552	605.75	15.5258	630.655	29.2844
	13.6489	1.0276	1.72968	2.29976	0.171297	2.05741	0.894618	1019.26	19.3965	1019.63	14.7978	1021.3	20.802			16.3578	1.23773	0.852185	3.08425	0.101145	2.82499	0.915943	621.117	16.7278	625.848	14.4098	643.939	26.6122			16.6806	1.07819	0.828154	3.30692	0.100233	3.12622	0.945356	615.774	18.3597	612.587	15.2119	601.743	23.3372
	13.6149	0.873332	1.71794	2.8575	0.169711	2.72078	0.952151	1010.52	25.4475	1015.25	18.3414	1026.35	17.6644			16.298	1.51923	0.855317	2.8664	0.101146	2.43068	0.84799	621.122	14.393	627.563	13.4184	651.797	32.6321			16.8098	1.44466	0.825355	3.81025	0.100668	3.52576	0.925335	618.32	20.7877	611.032	17.4952	585.07	31.3592
	13.5663	1.15094	1.6612	3.48956	0.16352	3.29429	0.944043	976.307	29.8455	993.832	22.1214	1033.58	23.2735			16.4997	0.858604	0.858105	2.45342	0.102732	2.29827	0.936764	630.399	13.8024	629.088	11.5051	625.297	18.5327			16.3639	1.3306	0.848567	3.31937	0.100754	3.04101	0.91614	618.824	17.9435	623.862	15.4728	643.132	28.6238
	13.5527	0.982019	1.71494	3.08741	0.16864	2.92707	0.948067	1004.61	27.2292	1014.13	19.8047	1035.61	19.8554			16.2153	1.09548	0.876002	2.3452	0.103067	2.07361	0.884196	632.356	12.49	638.821	11.1198	662.665	23.4729			16.962	1.19892	0.827393	3.41963	0.10183	3.20257	0.936526	625.127	19.0801	612.165	15.7226	565.421	26.1185
	13.5438	0.973133	1.74693	3.1802	0.171675	3.02765	0.952032	1021.33	28.5974	1026.03	20.5386	1036.92	19.671			16.4547	1.12682	0.863887	2.47728	0.103142	2.20617	0.890561	632.795	13.2972	632.243	11.659	631.227	24.2907			16.6023	1.29357	0.846017	3.41155	0.101914	3.1568	0.925326	625.619	18.8215	622.46	15.8767	611.916	27.9723
	13.5038	1.07591	1.8007	2.81062	0.176434	2.59653	0.92383	1047.47	25.1032	1045.71	18.3507	1042.91	21.7273			16.3365	1.20278	0.884141	2.24692	0.104801	1.89788	0.84466	642.485	11.6057	643.217	10.7063	646.741	25.8552			16.5728	1.10095	0.848414	3.33504	0.102021	3.14808	0.94394	626.244	18.7874	623.778	15.5444	615.762	23.7925
	13.4947	1.14628	1.74834	2.96721	0.171189	2.73686	0.922367	1018.66	25.7882	1026.55	19.1684	1044.26	23.1436			16.5508	1.00365	0.883848	2.71631	0.106141	2.52409	0.929234	650.298	15.6134	643.059	12.9409	618.636	21.6632			16.9868	1.18703	0.829129	2.9081	0.102193	2.65481	0.912902	627.246	15.8677	613.129	13.3857	562.249	25.8716
	13.4734	1.22923	1.89018	3.09143	0.184786	2.83653	0.917548	1093.07	28.5192	1077.65	20.5318	1047.48	24.8051			16.0606	0.843646	0.917722	2.99065	0.106945	2.86919	0.959387	654.982	17.8696	661.155	14.5329	683.172	18.0144			16.434	1.04302	0.86331	2.66681	0.102943	2.45438	0.920344	631.634	14.7674	631.928	12.5466	633.939	22.4548
	13.4715	1.43021	1.82229	3.5496	0.178123	3.24872	0.915235	1056.71	31.6638	1053.51	23.2756	1047.77	28.857			15.953	1.47896	0.977839	2.68308	0.113187	2.23866	0.834362	691.231	14.6736	692.496	13.4699	697.524	31.5259			16.5109	1.38528	0.85995	3.65931	0.103023	3.38696	0.925575	632.098	20.3929	630.096	17.1807	623.836	29.8812
	13.4659	0.957607	1.86894	2.50663	0.182607	2.3165	0.92415	1081.2	23.0584	1070.15	16.5818	1048.61	19.3242			16.2945	0.9344	0.958222	2.57242	0.113291	2.39672	0.931697	691.833	15.7226	682.375	12.782	652.225	20.0555			16.4474	1.35448	0.871065	2.86851	0.103952	2.52859	0.881498	637.53	15.349	636.146	13.5605	632.188	29.1801
	13.4577	1.11026	1.77484	3.07606	0.173307	2.86871	0.932591	1030.31	27.3157	1036.29	19.9803	1049.84	22.3974			14.416	0.77523	1.27912	2.20839	0.133796	2.06785	0.936361	809.485	15.7307	836.46	12.5855	909.66	15.9628			16.1734	1.29498	0.889183	3.07664	0.104347	2.79083	0.907104	639.834	16.9992	645.93	14.7046	668.211	27.7195
	13.44	1.11641	1.82166	2.75341	0.177646	2.51692	0.91411	1054.1	24.4754	1053.28	18.0513	1052.48	22.5128			13.9798	1.41528	1.32266	2.62149	0.134165	2.20662	0.841745	811.581	16.8271	855.678	15.1591	972.665	28.8595			13.7386	1.78641	1.06832	3.99985	0.106496	3.57876	0.894724	652.363	22.2042	737.917	20.9807	1008.03	36.2369
	13.4244	1.28904	1.77506	2.76069	0.1729	2.44126	0.884295	1028.07	23.199	1036.37	17.9322	1054.83	25.9742			14.5121	1.60429	1.46704	2.94674	0.154476	2.47175	0.838807	926.007	21.3207	916.911	17.7944	896	33.0907			16.0372	1.02444	0.933647	2.85685	0.108642	2.66685	0.933495	664.858	16.8471	669.552	14.0072	686.328	21.8517
	13.3927	1.02173	1.72485	3.04656	0.167613	2.87012	0.942086	998.945	26.5601	1017.83	19.5841	1059.59	20.5631			14.3383	1.19248	1.49971	2.77176	0.156024	2.50213	0.902721	934.645	21.7698	930.267	16.8866	920.823	24.5262			16.1417	1.12728	0.939281	2.84599	0.11001	2.61322	0.918211	672.806	16.6955	672.506	13.9973	672.451	24.0948
	13.3759	1.13395	1.84888	3.01425	0.17944	2.79282	0.926541	1063.91	27.391	1063.03	19.8655	1062.12	22.8322			14.3204	1.11387	1.43666	2.70626	0.149278	2.4664	0.91137	896.913	20.6516	904.328	16.203	923.397	22.8956			16.0289	1.20748	0.968377	3.50023	0.112625	3.28536	0.938613	687.975	21.4382	687.627	17.4866	687.417	25.7877
	13.3678	1.26814	1.85009	3.84866	0.179449	3.63373	0.944155	1063.96	35.6399	1063.46	25.3725	1063.33	25.5193			14.2101	1.26146	1.50843	3.3196	0.155529	3.07058	0.924984	931.88	26.6422	933.806	20.272	939.225	25.8791			15.2783	1.06731	1.14509	3.28878	0.126941	3.11077	0.945875	770.393	22.5886	774.924	17.828	788.893	22.4236
	13.3484	1.16143	1.72655	3.26505	0.167223	3.0515	0.934595	996.792	28.1823	1018.47	20.9965	1066.25	23.3601			14.1427	0.991686	1.52313	2.45183	0.1563	2.24233	0.914552	936.182	19.5392	939.739	15.0297	948.994	20.3043			14.5442	1.27667	1.41922	2.94757	0.149771	2.65675	0.901334	899.68	22.3093	897.037	17.5595	891.447	26.3661
	13.3231	1.11823	1.83534	3.14967	0.177423	2.94449	0.934855	1052.88	28.6028	1058.19	20.7046	1070.06	22.4525			14.0718	0.964393	1.52375	2.31079	0.155579	2.09993	0.908749	932.162	18.2254	939.985	14.1673	959.232	19.7084			14.6053	1.03941	1.44184	3.48747	0.152798	3.32898	0.954553	916.628	28.4443	906.486	20.9123	882.777	21.4956
	13.3205	0.891921	1.86397	2.48179	0.180155	2.31598	0.933189	1067.82	22.7909	1068.39	16.4023	1070.46	17.9178			14.0464	2.99517	1.65799	4.47386	0.16898	3.32331	0.742829	1006.49	30.9685	992.608	28.3435	962.972	61.1857			14.1031	0.851617	1.53329	3.92475	0.156901	3.83124	0.976175	939.53	33.4958	943.817	24.1247	954.702	17.4149
	13.2841	1.05378	1.81224	2.55499	0.174677	2.32755	0.910984	1037.83	22.3119	1049.89	16.7194	1075.95	21.1479			14.0442	1.21551	1.50553	2.76426	0.153417	2.48267	0.898133	920.09	21.2876	932.628	16.867	963.286	24.8252			13.9948	1.30217	1.56455	3.15651	0.15887	2.8754	0.910942	950.494	25.4113	956.269	19.5555	970.483	26.5574
	13.2728	1.60067	1.94533	2.98831	0.187345	2.52346	0.844445	1106.98	25.6675	1096.84	20.0434	1077.63	32.1113			13.9907	1.49191	1.62681	3.10129	0.165144	2.71886	0.876687	985.3	24.8422	980.625	19.5045	971.073	30.4147			13.9786	1.36146	1.56121	2.79392	0.158348	2.43976	0.873238	947.591	21.5001	954.948	17.2943	972.842	27.7573
	13.272	1.3183	1.90061	2.77053	0.183027	2.43679	0.879538	1083.49	24.3029	1081.3	18.435	1077.76	26.4464			13.9818	1.27522	1.6245	2.48105	0.164805	2.12824	0.8578	983.424	19.4115	979.735	15.5945	972.344	25.9987			13.9267	1.08188	1.54782	2.62246	0.156407	2.3889	0.910938	936.779	20.8287	949.623	16.1781	980.378	22.038
	13.2668	1.25063	1.88573	3.4236	0.181524	3.18699	0.930891	1075.3	31.5642	1076.08	22.72	1078.52	25.0817			13.9678	1.03705	1.57482	2.50504	0.159605	2.2803	0.910284	954.579	20.2324	960.328	15.5583	974.407	21.1396			13.926	1.08468	1.70932	3.69604	0.172719	3.53329	0.955968	1027.07	33.5465	1012.03	23.6814	980.482	22.0946
	13.2628	0.963458	1.86906	2.79977	0.179864	2.62878	0.938926	1066.23	25.8337	1070.2	18.5218	1079.15	19.3341			13.9605	0.796302	1.66375	2.60043	0.168531	2.47551	0.951961	1004.01	23.0156	994.808	16.4933	975.457	16.2354			13.8773	1.05275	1.61346	2.58654	0.162461	2.36261	0.913424	970.442	21.2855	975.453	16.2154	987.662	21.4047
	13.2015	1.10675	1.99129	2.88005	0.190741	2.65891	0.923215	1125.39	27.4569	1112.56	19.4697	1088.45	22.1603			13.9491	0.789265	1.63	2.46614	0.164976	2.33644	0.947404	984.371	21.3293	981.859	15.5208	977.135	16.0792			13.8541	1.3779	1.73321	3.46256	0.174227	3.17659	0.91741	1035.36	30.3841	1020.95	22.2985	991.069	28.0029
	13.1631	1.25274	1.92217	3.72975	0.183586	3.51307	0.941906	1086.54	35.1277	1088.82	24.9163	1094.29	25.0831			13.9187	1.11366	1.70503	2.69608	0.172194	2.45532	0.9107	1024.19	23.2512	1010.42	17.2569	981.598	22.6811			13.8282	1.51605	1.68181	3.05681	0.168745	2.65437	0.868346	1005.19	24.7055	1001.67	19.4671	994.864	30.7954
	13.1429	0.98197	1.85185	2.43118	0.176597	2.22404	0.9148	1048.36	21.5188	1064.09	16.031	1097.36	19.6645			13.9122	0.961794	1.67545	2.71396	0.169128	2.53782	0.935099	1007.31	23.6665	999.256	17.2588	982.542	19.5654			13.8202	1.41254	1.69156	3.09402	0.169625	2.75276	0.889703	1010.04	25.7355	1005.35	19.7466	996.042	28.7057
	13.0698	1.02333	1.95349	2.66334	0.185254	2.4589	0.923238	1095.62	24.7752	1099.65	17.8887	1108.49	20.4548			13.8837	0.828148	1.63993	2.01725	0.165204	1.83942	0.911846	985.632	16.812	985.687	12.7246	986.715	16.8406			13.7921	1.16402	1.73071	3.17344	0.173197	2.95225	0.9303	1029.7	28.096	1020.02	20.4252	1000.14	23.6331
	13.0404	1.09763	2.07024	2.97355	0.195884	2.76356	0.929378	1153.17	29.181	1139.01	20.3616	1112.98	21.9157			13.8617	0.824178	1.63332	2.4434	0.164276	2.30021	0.941395	980.498	20.9221	983.139	15.3895	989.905	16.7442			13.7892	1.26267	1.64937	3.38424	0.165024	3.13986	0.92779	984.635	28.671	989.31	21.3959	1000.56	25.6265
	13.0142	1.04885	2.01195	3.02565	0.189986	2.83804	0.937993	1121.3	29.2092	1119.55	20.5247	1117.03	20.9366			13.8492	0.689612	1.68617	2.48398	0.169439	2.38633	0.96069	1009.02	22.2888	1003.32	15.8336	991.738	14.009			13.7574	1.18045	1.64006	3.12443	0.163713	2.89286	0.925882	977.379	26.2352	985.734	19.7107	1005.25	23.9353
	12.9861	0.98189	1.89225	3.14587	0.178297	2.98871	0.950043	1057.66	29.1537	1078.37	20.9013	1121.35	19.5818			13.7596	0.930218	1.7443	2.65451	0.174146	2.48619	0.936589	1034.92	23.7709	1025.06	17.1335	1004.93	18.8782			13.7527	1.13603	1.70473	3.77782	0.17011	3.60296	0.953715	1012.72	33.7664	1010.31	24.1816	1005.95	23.0318
	12.9838	0.951569	2.0462	2.42154	0.192769	2.22675	0.919556	1136.36	23.1991	1131.03	16.5177	1121.69	18.9683			13.7351	0.876577	1.73273	2.602	0.172683	2.4499	0.941545	1026.88	23.2561	1020.76	16.7537	1008.54	17.7593			13.7108	1.08236	1.6294	3.43372	0.162099	3.25866	0.94902	968.432	29.3021	981.629	21.6088	1012.13	21.9223
	12.9423	1.02011	2.06062	2.95807	0.193508	2.7766	0.938656	1140.35	29.0208	1135.83	20.2248	1128.08	20.3218			13.7345	1.00784	1.69993	2.89338	0.169408	2.71217	0.937373	1008.85	25.3282	1008.51	18.4996	1008.63	20.4339			13.7041	1.00687	1.78222	3.48307	0.177214	3.33436	0.957306	1051.74	32.3577	1038.99	22.6586	1013.13	20.396
	12.9287	0.997867	1.9634	3.58988	0.184183	3.4484	0.960591	1089.79	34.5757	1103.05	24.1552	1130.16	19.8831			13.7309	0.821615	1.62337	2.90389	0.161735	2.78523	0.959139	966.414	24.9965	979.296	18.248	1009.16	16.646			13.681	1.40179	1.75639	3.5257	0.174352	3.23505	0.917563	1036.04	30.9622	1029.52	22.8154	1016.54	28.4045
	12.9003	1.09787	1.97635	2.99581	0.184991	2.78739	0.93043	1094.18	28.0514	1107.48	20.2014	1134.52	21.8511			13.728	1.19487	1.73686	2.68275	0.173005	2.40196	0.895336	1028.65	22.8374	1022.3	17.2888	1009.59	24.2237			13.6746	1.30456	1.71264	3.04513	0.169929	2.75153	0.903586	1011.72	25.7634	1013.27	19.5237	1017.5	26.4045
	12.8743	1.30901	2.08994	3.20544	0.195229	2.92598	0.912816	1149.64	30.8096	1145.51	22.0176	1138.57	26.0383			13.681	1.96568	1.74654	3.38279	0.173374	2.75306	0.813845	1030.67	26.2231	1025.88	21.8456	1016.54	39.8394			13.6691	0.952295	1.74644	3.0388	0.173213	2.88573	0.949628	1029.79	27.4651	1025.85	19.6232	1018.31	19.2854
	12.8651	1.28975	1.95233	3.15038	0.182244	2.87427	0.912357	1079.22	28.5624	1099.25	21.1565	1139.96	25.6508			13.6767	0.831631	1.70477	3.12682	0.169175	3.0142	0.963982	1007.56	28.1157	1010.32	20.0136	1017.18	16.8451			13.6587	1.09011	1.73656	3.39684	0.172102	3.21717	0.947106	1023.68	30.452	1022.19	21.8906	1019.85	22.0717
	12.8633	0.961427	2.08801	3.01633	0.194882	2.85901	0.947842	1147.77	30.0596	1144.87	20.7121	1140.27	19.1022			13.6586	1.0351	1.78014	3.54123	0.17642	3.38657	0.956327	1047.39	32.7391	1038.23	23.0274	1019.87	20.9588			13.6495	0.873597	1.78824	2.73041	0.177106	2.58688	0.947434	1051.14	25.0907	1041.19	17.7827	1021.21	17.6849
	12.8517	1.14285	2.07472	3.67179	0.193467	3.48941	0.950328	1140.13	36.4646	1140.49	25.1623	1142.03	22.703			13.6568	0.936624	1.60306	2.83281	0.158849	2.67349	0.943759	950.378	23.6242	971.403	17.7156	1020.13	18.9645			13.646	1.35477	1.70466	3.76941	0.168785	3.51753	0.933179	1005.41	32.746	1010.28	24.1274	1021.72	27.4237
	12.7042	1.74912	2.00231	3.6276	0.184572	3.17806	0.876078	1091.9	31.9218	1116.29	24.5703	1164.94	34.6566			13.6325	0.78007	1.77535	2.39648	0.17561	2.26596	0.94554	1042.95	21.8202	1036.48	15.5669	1023.73	15.7855			13.6333	0.902321	1.7944	2.67484	0.177504	2.51805	0.941384	1053.33	24.4699	1043.43	17.4422	1023.62	18.2592
	12.6855	0.984056	2.09931	3.06578	0.19323	2.90356	0.947086	1138.85	30.3111	1148.58	21.0885	1167.85	19.5093			13.6232	0.913151	1.73118	2.75541	0.171123	2.5997	0.943489	1018.3	24.4878	1020.19	17.7358	1025.12	18.474			13.5925	0.987699	1.78427	2.32467	0.175974	2.10441	0.905251	1044.94	20.3002	1039.74	15.1277	1029.67	19.9883
	12.5764	0.981593	2.16321	2.78163	0.197398	2.60268	0.935667	1161.32	27.6596	1169.3	19.3176	1184.98	19.3928			13.62	0.77774	1.71778	2.50427	0.169759	2.38044	0.950552	1010.78	22.2696	1015.2	16.0731	1025.59	15.7339			13.5902	1.47833	1.74671	3.61636	0.17224	3.3004	0.912629	1024.44	31.2612	1025.95	23.3553	1030.02	29.907
	12.5182	0.851161	2.00186	4.04641	0.181829	3.95587	0.977626	1076.96	39.2351	1116.14	27.4062	1194.14	16.7748			13.6161	0.982929	1.75148	2.57659	0.17304	2.38173	0.924375	1028.84	22.6489	1027.71	16.6553	1026.17	19.902			13.5698	1.5246	1.79446	3.81725	0.176684	3.49957	0.916778	1048.83	33.8745	1043.45	24.8945	1033.05	30.8283
	12.5145	1.58874	2.2326	3.62472	0.202728	3.25799	0.898825	1189.96	35.4012	1191.34	25.4246	1194.68	31.3466			13.6126	1.54076	1.79261	2.65601	0.177058	2.16344	0.814543	1050.88	20.9788	1042.77	17.3132	1026.69	31.165			13.5686	1.31711	1.71008	3.10612	0.16836	2.81304	0.905645	1003.07	26.1312	1012.31	19.9039	1033.23	26.6341
	12.4547	1.28755	2.2591	3.02557	0.204154	2.73793	0.904931	1197.6	29.924	1199.63	21.298	1204.12	25.368			13.5726	1.16505	1.79631	3.09601	0.176902	2.86844	0.926495	1050.03	27.7944	1044.12	20.1969	1032.64	23.5625			13.566	1.13633	1.84705	3.32749	0.18181	3.12745	0.939883	1076.85	31.0157	1062.38	21.9229	1033.63	22.9785
	12.378	0.97689	2.31563	3.05746	0.207973	2.89719	0.947583	1218.01	32.1551	1217.09	21.685	1216.32	19.2126			13.5701	0.904191	1.82692	2.05523	0.179884	1.84565	0.898024	1066.34	18.1393	1055.17	13.4872	1033.01	18.2894			13.5653	0.961708	1.75625	3.07272	0.172863	2.91834	0.949759	1027.87	27.7276	1029.47	19.8827	1033.73	19.4498
	12.3685	1.15501	2.19533	3.05498	0.197017	2.82823	0.925775	1159.28	30.0082	1179.56	21.3151	1217.82	22.7038			13.5657	0.827626	1.7869	2.84625	0.175886	2.72326	0.956791	1044.46	26.2588	1040.7	18.5323	1033.66	16.7407			13.551	1.13365	1.68879	3.4662	0.166048	3.27557	0.945004	990.3	30.0695	1004.31	22.1091	1035.85	22.9169
	12.3387	1.11896	2.35399	3.12509	0.210746	2.91789	0.9337	1232.79	32.7415	1228.77	22.2743	1222.54	21.9693			13.5649	0.770487	1.76133	2.40805	0.173359	2.28146	0.94743	1030.59	21.7294	1031.34	15.5974	1033.78	15.5869			13.5366	1.07819	1.80081	3.49814	0.176875	3.32783	0.951315	1049.88	32.2417	1045.75	22.8415	1038	21.7907
	12.3346	1.19321	2.38466	2.97695	0.213422	2.72736	0.916159	1247.03	30.9238	1238.01	21.2999	1223.18	23.4516			13.5633	1.10881	1.765	3.14258	0.173699	2.94047	0.935686	1032.46	28.0529	1032.68	20.3716	1034.02	22.4217			13.536	1.16194	1.81898	3.49079	0.178651	3.29173	0.942976	1059.6	32.1637	1052.32	22.8751	1038.09	23.4809
	12.3085	1.20464	2.41432	3.331	0.215619	3.10554	0.932316	1258.69	35.5099	1246.87	23.9208	1227.36	23.6722			13.5633	1.18213	1.77432	2.41093	0.174616	2.10123	0.871542	1037.5	20.1364	1036.1	15.6576	1034.03	23.9039			13.5046	1.01787	1.79859	2.72633	0.17624	2.52919	0.927691	1046.4	24.4292	1044.95	17.7928	1042.77	20.5578
	12.2909	1.3627	2.39968	3.83395	0.214005	3.58361	0.934703	1250.12	40.7238	1242.5	27.4851	1230.2	26.7674			13.5575	0.979624	1.70995	2.64838	0.16821	2.46054	0.929074	1002.24	22.8393	1012.27	16.9697	1034.88	19.8093			13.4896	1.20356	1.69485	3.04937	0.165889	2.8018	0.918813	989.422	25.6992	1006.59	19.4756	1045.06	24.2954
	12.2279	1.0726	2.2391	3.44115	0.19866	3.26972	0.950181	1168.12	34.934	1193.37	24.1582	1240.25	21.0196			13.4747	1.33426	1.82109	2.8107	0.178048	2.47382	0.880144	1056.3	24.1026	1053.08	18.425	1047.29	26.9232			13.4854	1.122	1.76593	3.61846	0.172792	3.44011	0.950711	1027.48	32.6737	1033.03	23.4619	1045.69	22.6476
	12.1401	1.02158	2.273	2.8596	0.20022	2.67089	0.93401	1176.5	28.7227	1203.95	20.1672	1254.36	19.9835			13.4616	0.770206	1.83033	2.51462	0.178778	2.39376	0.951938	1060.29	23.4036	1056.4	16.5132	1049.25	15.545			13.48	1.27676	1.81346	3.30809	0.177372	3.05178	0.92252	1052.6	29.6378	1050.33	21.6541	1046.49	25.7667
	12.1196	1.08764	2.41209	3.08586	0.212115	2.88783	0.935827	1240.07	32.5777	1246.2	22.1538	1257.68	21.2467			13.4252	1.14456	1.78816	2.74618	0.174187	2.4963	0.909007	1035.14	23.8723	1041.15	17.8851	1054.7	23.0535			13.4787	1.23884	1.80546	3.34414	0.176572	3.10622	0.928853	1048.22	30.0508	1047.44	21.8557	1046.7	25.0013
	12.0975	2.17151	2.11418	3.18801	0.185577	2.33409	0.732144	1097.37	23.5522	1153.44	21.9794	1261.24	42.419			13.4246	1.16151	1.82381	2.98411	0.177651	2.74878	0.921139	1054.13	26.7308	1054.06	19.5723	1054.8	23.4133			13.4488	0.905583	1.78817	2.46364	0.174494	2.29116	0.929992	1036.82	21.9435	1041.16	16.0447	1051.17	18.2675
	12.0296	1.01104	2.27282	3.27779	0.198383	3.11797	0.95124	1166.63	33.2738	1203.89	23.1169	1272.24	19.7254			13.4055	1.32025	1.89284	2.68874	0.184113	2.34228	0.871143	1089.41	23.4774	1078.58	17.8654	1057.66	26.6004			13.4257	1.06465	1.68909	2.76265	0.164542	2.54926	0.922761	981.97	23.2197	1004.42	17.6216	1054.63	21.4623
	11.8442	0.941529	2.56501	3.55013	0.220436	3.423	0.964191	1284.18	39.8565	1290.72	25.9416	1302.45	18.2914			13.404	0.883007	1.69655	2.31742	0.165003	2.1426	0.924563	984.518	19.5625	1007.23	14.8055	1057.88	17.7955			13.4247	1.28691	1.76722	3.06491	0.172141	2.78164	0.907578	1023.89	26.3345	1033.5	19.877	1054.78	25.9347
	11.7862	0.932138	2.55107	2.99819	0.218165	2.84961	0.950443	1272.17	32.8993	1286.74	21.8736	1311.97	18.0853			13.3855	0.869292	1.81324	2.14577	0.176107	1.96179	0.914264	1045.67	18.9366	1050.25	14.0439	1060.67	17.5001			13.4228	1.17258	1.85255	3.84696	0.180427	3.6639	0.952414	1069.31	36.1018	1064.34	25.3732	1055.06	23.6277
	11.7153	0.990903	2.64653	3.25951	0.224967	3.10524	0.952671	1308.07	36.7632	1313.68	24.0248	1323.67	19.192			13.3671	1.27948	1.85472	2.77908	0.179888	2.46702	0.887712	1066.36	24.2468	1065.11	18.3355	1063.44	25.7535			13.4152	1.57463	1.72429	3.40787	0.16784	3.02227	0.88685	1000.2	28.0005	1017.63	21.9047	1056.21	31.7279
	11.6989	1.16787	2.69836	3.52994	0.229052	3.33114	0.943684	1329.53	40.0203	1328.01	26.1567	1326.39	22.6136			13.3514	0.978736	1.72578	2.96676	0.167186	2.80067	0.944016	996.588	25.8608	1018.18	19.0747	1065.8	19.6731			13.4	1.18826	1.82376	3.02762	0.17732	2.7847	0.919764	1052.32	27.0373	1054.04	19.8576	1058.49	23.9237
	11.6961	1.11908	2.62057	3.27282	0.222394	3.07555	0.939724	1294.51	36.0709	1306.42	24.0576	1326.86	21.6665			13.3269	0.804642	1.8661	2.68599	0.180447	2.56263	0.954074	1069.42	25.2529	1069.15	17.7591	1069.49	16.1623			13.3895	1.09828	1.75706	3.25468	0.170702	3.06377	0.941344	1015.98	28.7985	1029.77	21.064	1060.07	22.1189
	11.5881	1.13464	2.64997	3.31907	0.222813	3.11911	0.939753	1296.72	36.6381	1314.64	24.4727	1344.8	21.9121			13.302	0.810228	1.79497	2.84865	0.173245	2.731	0.958698	1029.96	25.9964	1043.63	18.5779	1073.25	16.2617			13.3451	1.05689	1.8422	3.24392	0.17838	3.06692	0.945437	1058.12	29.9285	1060.65	21.3524	1066.75	21.2481
	11.4377	1.16069	2.92804	3.32092	0.242999	3.11148	0.936933	1402.27	39.2124	1389.19	25.1407	1369.98	22.3373			13.2984	0.92117	1.82713	2.33513	0.176302	2.14576	0.918903	1046.74	20.7319	1055.25	15.3249	1073.79	18.4816			13.3253	1.40548	1.81935	3.38555	0.175906	3.08002	0.909757	1044.57	29.7019	1052.45	22.1868	1069.73	28.2449
	11.4335	1.17704	2.90261	3.40105	0.240799	3.19088	0.938205	1390.85	39.9196	1382.59	25.6903	1370.69	22.6496			13.2917	0.890872	1.78088	3.02573	0.171752	2.89161	0.955673	1021.76	27.3229	1038.5	19.6774	1074.8	17.8707			13.3236	1.12128	1.8634	3.05185	0.180143	2.8384	0.930059	1067.75	27.9304	1068.19	20.1685	1069.98	22.5141
	11.4065	1.02862	2.78816	3.39311	0.230758	3.23344	0.952943	1338.47	39.0816	1352.37	25.3634	1375.24	19.7815			13.26	0.824552	1.89666	2.18209	0.182482	2.0203	0.925857	1080.52	20.0984	1079.92	14.5085	1079.57	16.5376			13.3118	1.23577	1.71557	3.61133	0.165704	3.39331	0.93963	988.395	31.0949	1014.37	23.1696	1071.77	24.8147
	11.378	0.938987	2.31046	2.35848	0.190745	2.1635	0.917328	1125.41	22.3414	1215.5	16.7152	1380.04	18.0459			13.2452	0.928928	1.83579	2.97334	0.176428	2.82451	0.949944	1047.43	27.3065	1058.36	19.5469	1081.84	18.6338			13.2816	1.00697	1.85885	2.7952	0.179135	2.60751	0.932856	1062.25	25.5367	1066.58	18.4562	1076.33	20.216
	11.3686	4.72677	2.3796	5.61305	0.19629	3.02719	0.539314	1155.36	32.0202	1236.49	40.1507	1381.63	90.8688			13.2249	1.02714	1.92269	2.07538	0.184497	1.80339	0.868941	1091.49	18.1077	1089	13.8638	1084.91	20.5945			13.2784	1.14121	1.88746	3.56803	0.18185	3.38061	0.947471	1077.07	33.5326	1076.69	23.6864	1076.81	22.9038
	11.2365	1.1027	3.02961	2.82987	0.247006	2.6062	0.920958	1423.01	33.2788	1415.11	21.6066	1404.04	21.1215			13.2011	1.40515	1.91179	2.60117	0.183122	2.18899	0.841538	1084.01	21.841	1085.21	17.3429	1088.49	28.1591			13.2676	1.03325	1.89845	3.06783	0.18276	2.8886	0.941576	1082.03	28.7735	1080.55	20.4058	1078.41	20.72
	11.1506	0.887944	3.03962	2.93224	0.245925	2.79456	0.953047	1417.43	35.5588	1417.63	22.4067	1418.74	16.9739			13.1963	0.929612	1.88712	2.91326	0.180693	2.76096	0.947722	1070.76	27.2386	1076.57	19.3373	1089.25	18.6078			13.2506	1.82928	1.89908	3.51098	0.182586	2.99679	0.853547	1081.09	29.8272	1080.77	23.357	1081.01	36.7204
	11.0949	1.06057	3.0735	2.7206	0.247427	2.50536	0.920887	1425.19	32.0349	1426.11	20.8459	1428.29	20.2478			13.1656	1.05194	1.90214	3.02159	0.181706	2.83257	0.937443	1076.29	28.0777	1081.84	20.1116	1093.92	21.0453			13.2465	1.13074	1.90619	3.76463	0.183213	3.59081	0.953827	1084.5	35.8433	1083.26	25.0775	1081.6	22.6794
	10.9807	1.07498	3.073	3.32007	0.244838	3.14122	0.946131	1411.8	39.8279	1425.98	25.4399	1448.03	20.4683			13.1648	0.875924	1.9187	2.67932	0.183278	2.5321	0.945052	1084.86	25.2827	1087.62	17.8862	1094.04	17.5206			13.2184	1.05322	1.89144	3.02847	0.181409	2.83943	0.937579	1074.67	28.1067	1078.09	20.1182	1085.89	21.1055
	10.9337	1.26306	3.19926	3.33636	0.253808	3.08804	0.92557	1458.08	40.2977	1456.98	25.8151	1456.19	24.0233			13.137	1.01559	1.71262	2.72931	0.163246	2.53332	0.928191	974.793	22.9183	1013.27	17.4984	1098.24	20.3403			13.2135	1.27571	1.98732	3.4217	0.190533	3.17499	0.927899	1124.26	32.7562	1111.21	23.117	1086.65	25.5541
	10.8964	1.01716	3.22738	2.76002	0.255164	2.56575	0.929615	1465.05	33.6245	1463.76	21.3986	1462.69	19.3289			13.1176	1.00302	1.93406	2.79399	0.184082	2.60774	0.933341	1089.24	26.1346	1092.95	18.7027	1101.19	20.0723			13.1854	1.25029	1.86232	3.29172	0.17817	3.04503	0.925057	1056.97	29.6852	1067.81	21.7498	1090.87	25.0469
	10.8323	1.07117	3.26188	3.7358	0.256377	3.57894	0.958011	1471.28	47.0802	1472.01	29.0401	1473.88	20.3248			13.0793	1.14722	1.86352	2.55711	0.176851	2.28532	0.893713	1049.75	22.1388	1068.24	16.8987	1107.05	22.9266			13.152	1.26126	2.00477	3.18458	0.191312	2.92417	0.918227	1128.48	30.272	1117.12	21.5775	1095.97	25.2477
	10.8274	1.13965	3.19611	3.34483	0.251092	3.14469	0.940165	1444.11	40.6861	1456.22	25.8745	1474.74	21.6218			13.0713	1.13375	1.86113	2.74461	0.176516	2.49951	0.910695	1047.91	24.1747	1067.39	18.13	1108.26	22.6647			13.1305	1.46803	1.96476	3.19415	0.187187	2.83681	0.888127	1106.12	28.8342	1103.51	21.4966	1099.23	29.3637
	10.6472	1.1323	3.32619	3.29169	0.256963	3.09081	0.938974	1474.29	40.7329	1487.22	25.703	1506.52	21.3898			13.018	1.00055	1.85738	2.76119	0.175442	2.57353	0.932038	1042.02	24.7617	1066.05	18.2266	1116.45	19.9767			13.1277	1.04942	1.86042	3.37134	0.177209	3.20385	0.950319	1051.71	31.0904	1067.14	22.2681	1099.69	21.0033
	10.5672	1.10511	3.35201	2.88022	0.257011	2.65977	0.923462	1474.53	35.0574	1493.26	22.529	1520.75	20.8367			13.0064	0.650209	1.96102	2.58061	0.185066	2.49735	0.967738	1094.59	25.1411	1102.23	17.3554	1118.24	12.973			13.0877	1.15738	2.02248	2.68734	0.192059	2.42533	0.902505	1132.52	25.1901	1123.09	18.2608	1105.75	23.1506
	10.4985	1.38318	3.38636	2.89893	0.257957	2.54766	0.87883	1479.38	33.6779	1501.24	22.7284	1533.05	26.038			12.9331	0.923414	2.04662	2.57199	0.192056	2.40051	0.933327	1132.5	24.9318	1131.17	17.5453	1129.5	18.4005			13.0093	1.05491	1.9127	2.87014	0.180546	2.66925	0.930005	1069.96	26.3157	1085.53	19.1397	1117.79	21.067
	10.1728	0.976046	3.92614	3.10123	0.289798	2.94363	0.949182	1640.52	42.6365	1619.08	25.1022	1592.12	18.2311			12.9082	0.968685	1.98861	3.03196	0.186253	2.87305	0.947589	1101.04	29.0797	1111.65	20.4876	1133.33	19.2846			12.9871	1.1547	1.86687	2.66212	0.175919	2.39866	0.901033	1044.64	23.1326	1069.42	17.6038	1121.19	23.0282
	9.95216	1.15827	3.83395	3.01147	0.276855	2.77981	0.923075	1575.5	38.8552	1599.9	24.2569	1632.98	21.5211			12.8872	0.834536	2.08927	2.728	0.195363	2.59722	0.952059	1150.36	27.3635	1145.29	18.7354	1136.57	16.5874			12.9861	0.956224	2.11399	3.30628	0.19919	3.16499	0.957264	1170.97	33.8901	1153.38	22.7944	1121.35	19.061
	9.86509	1.11334	4.03544	3.20698	0.288855	3.00752	0.937805	1635.8	43.452	1641.37	26.1021	1649.29	20.643			12.8821	0.785303	2.07636	2.66884	0.194078	2.55069	0.955729	1143.43	26.7253	1141.03	18.2922	1137.36	15.624			12.9726	1.22778	1.94725	4.44533	0.183289	4.27242	0.961102	1084.92	42.6623	1097.5	29.8307	1123.4	24.472
	9.80309	1.02257	4.10003	3.32202	0.291634	3.16072	0.951446	1649.69	46.0056	1654.31	27.1238	1660.97	18.9314			12.8812	0.968482	2.01895	2.34567	0.188699	2.1364	0.910785	1114.32	21.8625	1121.91	15.9295	1137.51	19.2495			12.9615	1.29414	1.95817	3.56225	0.184159	3.31886	0.931675	1089.65	33.2731	1101.25	23.9476	1125.11	25.7967
	9.74981	1.00688	4.16223	2.76706	0.294449	2.57737	0.931446	1663.73	37.7942	1666.62	22.6574	1671.05	18.6168			12.8484	0.897627	1.99323	2.68527	0.185821	2.53079	0.942474	1098.7	25.5654	1113.22	18.1585	1142.54	17.8442			12.961	0.929057	2.04583	3.26896	0.192397	3.13416	0.958763	1134.35	32.6002	1130.91	22.2984	1125.17	18.5061
	9.66094	0.801946	4.22589	2.47179	0.296227	2.33809	0.945907	1672.57	34.4451	1679.06	20.2982	1687.97	14.7971			12.847	1.35405	2.00174	3.19011	0.186595	2.88849	0.90545	1102.9	29.2812	1116.1	21.6041	1142.76	26.8994			12.9455	1.27964	1.99265	3.6701	0.18717	3.43979	0.937247	1106.03	34.9605	1113.02	24.8181	1127.56	25.4763
	9.5229	1.16684	4.36848	3.76629	0.301847	3.58098	0.950798	1700.46	53.5251	1706.4	31.1285	1714.47	21.4566			12.8247	0.862169	2.01908	2.98384	0.187884	2.85656	0.957345	1109.9	29.126	1121.95	20.2648	1146.23	17.1253			12.9342	0.83489	2.06199	3.40797	0.193514	3.30412	0.969528	1140.39	34.5353	1136.28	23.3069	1129.3	16.648
	9.51705	0.933663	4.60726	2.54323	0.318151	2.36565	0.930175	1780.69	36.8079	1750.58	21.2212	1715.6	17.1658			12.7906	0.831595	2.15618	2.60305	0.200107	2.46664	0.947596	1175.9	26.5136	1167.04	18.0585	1151.5	16.5105			12.9237	1.02412	2.12368	3.01637	0.199142	2.8372	0.940599	1170.71	30.3741	1156.53	20.8256	1130.91	20.4129
	9.48248	1.04803	3.87194	3.01379	0.266403	2.82569	0.937589	1522.52	38.319	1607.85	24.3249	1722.29	19.2526			12.7899	1.13775	2.01385	3.0872	0.186889	2.8699	0.929612	1104.5	29.1314	1120.19	20.9489	1151.59	22.6002			12.9124	1.38742	2.00499	3.00607	0.187848	2.66675	0.88712	1109.71	27.1862	1117.2	20.3684	1132.66	27.603
	9.44636	0.9744	4.50722	3.06867	0.308931	2.90986	0.948248	1735.44	44.2733	1732.3	25.5063	1729.3	17.8841			12.7856	1.29343	2.05689	2.78493	0.190817	2.46635	0.885605	1125.8	25.477	1134.59	19.0295	1152.28	25.6957			12.8947	1.16112	2.1079	3.02477	0.19722	2.79303	0.923387	1160.37	29.6602	1151.39	20.8337	1135.38	23.1082
	9.4165	1.18057	4.51809	3.1737	0.308697	2.94595	0.928238	1734.29	44.7964	1734.31	26.3912	1735.11	21.653			12.7761	0.85371	2.05229	3.48263	0.190251	3.37637	0.969489	1122.73	34.7904	1133.06	23.7809	1153.74	16.9442			12.8931	1.14238	2.04764	3.33645	0.191557	3.13479	0.939557	1129.81	32.4873	1131.51	22.7655	1135.62	22.7344
	9.41238	1.03007	4.36567	3.109	0.298152	2.9334	0.943519	1682.14	43.4319	1705.87	25.6904	1735.91	18.8904			12.743	0.713979	2.05259	2.18017	0.189784	2.05995	0.944855	1120.21	21.182	1133.16	14.8862	1158.9	14.1786			12.8564	1.03303	2.13257	2.72452	0.198935	2.52108	0.925331	1169.6	26.9664	1159.42	18.8353	1141.3	20.5219
	9.28236	0.9282	4.51667	2.91033	0.304203	2.75834	0.947777	1712.12	41.4755	1734.04	24.1989	1761.38	16.9697			12.7368	0.860439	2.08236	2.66501	0.192444	2.52228	0.946445	1134.6	26.241	1143.01	18.283	1159.86	17.0801			12.8523	1.18041	2.08839	2.59246	0.194751	2.30814	0.890325	1147.06	24.2541	1145	17.8019	1141.96	23.4493
	9.00379	1.19748	5.0263	3.20566	0.328369	2.9736	0.92761	1830.47	47.3862	1823.76	27.1549	1816.89	21.742			12.7361	0.820062	2.1386	2.58227	0.19763	2.44859	0.948233	1162.58	26.0476	1161.37	17.8677	1159.97	16.2742			12.849	0.931714	2.04284	2.68204	0.190454	2.515	0.937721	1123.84	25.938	1129.91	18.2851	1142.46	18.5234
	8.88922	1.02916	4.85705	3.41461	0.313274	3.25582	0.953498	1756.8	50.0676	1794.84	28.7595	1840.11	18.6328			12.7288	0.689631	2.1994	2.63911	0.203133	2.54741	0.965254	1192.13	27.726	1180.85	18.4234	1161.1	13.6845			12.8358	0.981384	2.12625	2.90387	0.198027	2.73302	0.941162	1164.71	29.122	1157.37	20.0565	1144.49	19.4902
	8.87541	1.16755	4.8903	3.33555	0.314928	3.12453	0.936738	1764.91	48.2415	1800.59	28.1259	1842.92	21.1314			12.7176	1.10395	2.12421	2.55285	0.196015	2.30181	0.901663	1153.88	24.3188	1156.71	17.6261	1162.85	21.8925			12.8282	1.01377	2.18694	3.25738	0.203559	3.09561	0.950337	1194.41	33.7514	1176.89	22.7004	1145.7	20.1263
	8.70972	1.14576	5.2213	3.35844	0.329968	3.15695	0.940006	1838.22	50.4923	1856.1	28.6272	1876.95	20.652			12.7126	1.04486	2.13797	2.46201	0.197208	2.2293	0.905478	1160.3	23.6724	1161.17	17.0339	1163.63	20.7076			12.8193	1.46029	2.08886	3.59969	0.194296	3.29019	0.91402	1144.6	34.5061	1145.15	24.7225	1147.06	29.0123
	8.651	0.899953	5.59925	3.33511	0.351466	3.21139	0.962905	1941.6	53.8393	1915.98	28.7403	1889.14	16.197			12.6914	1.17166	2.13215	3.32066	0.196343	3.10709	0.935684	1155.65	32.8728	1159.28	22.9564	1166.93	23.205			12.8052	1.6093	1.90113	3.52811	0.176639	3.1397	0.88991	1048.59	30.3845	1081.49	23.4798	1149.25	31.9629
	8.3573	1.14626	4.54486	3.37818	0.275596	3.17777	0.940674	1569.15	44.2596	1739.22	28.1225	1951.07	20.4797			12.6803	0.834401	2.03675	2.36436	0.187394	2.21223	0.935658	1107.24	22.5067	1127.87	16.1031	1168.66	16.5428			12.7996	1.1039	2.17073	3.70982	0.2016	3.54177	0.954703	1183.91	38.3067	1171.71	25.7942	1150.11	21.9221
	8.2981	1.20672	5.87397	3.63105	0.35367	3.42467	0.943162	1952.1	57.6811	1957.4	31.5156	1963.76	21.528			12.6563	1.06435	2.07606	3.4609	0.190649	3.29317	0.951537	1124.89	33.9929	1140.93	23.7215	1172.45	21.0606			12.7878	0.729866	2.05717	2.50791	0.190878	2.39935	0.956715	1126.13	24.7915	1134.68	17.137	1151.92	14.4709
	8.26549	0.905951	6.09987	2.88225	0.365828	2.73617	0.949317	2009.74	47.2443	1990.23	25.149	1970.78	16.1482			12.6264	1.08562	2.10733	2.83186	0.193063	2.6155	0.923599	1137.95	27.2842	1151.21	19.503	1177.14	21.4909			12.7851	1.11131	2.01383	3.14859	0.186816	2.94594	0.93564	1104.1	29.8934	1120.18	21.3655	1152.35	22.0787
	7.81277	1.07385	6.66496	2.70587	0.377825	2.48367	0.917879	2066.11	43.9051	2067.99	23.8949	2070.61	18.9225			12.6012	1.11491	2.01895	3.31793	0.184597	3.125	0.941853	1092.04	31.3925	1121.91	22.534	1181.09	22.0409			12.7578	1.02733	2.05277	3.15481	0.190021	2.98285	0.945494	1121.49	30.7044	1133.22	21.5434	1156.6	20.3808
	7.80295	1.14823	6.56334	3.15243	0.371596	2.93588	0.931307	2036.91	51.2756	2054.44	27.784	2072.83	20.2282			12.5799	1.11497	2.07164	2.7404	0.189095	2.50332	0.913488	1116.47	25.6626	1139.48	18.7689	1184.43	22.0486			12.7394	1.36258	1.91753	2.89727	0.177246	2.55686	0.882507	1051.91	24.8163	1087.21	19.3374	1159.46	27.0287
	7.5199	1.07941	6.85117	3.42545	0.373822	3.25093	0.949054	2047.36	57.0258	2092.36	30.3603	2137.68	18.8774			12.558	0.993994	2.07195	2.41644	0.188794	2.20253	0.911479	1114.84	22.5488	1139.58	16.5504	1187.87	19.6476			12.7381	1.08916	2.03637	3.63018	0.188213	3.46294	0.95393	1111.69	35.3608	1127.75	24.7256	1159.66	21.5979
	7.48495	0.924816	7.43894	3.43717	0.404006	3.31042	0.963123	2187.46	61.4092	2165.67	30.7742	2145.82	16.1587			12.5486	1.36847	2.26102	2.67226	0.205867	2.29527	0.858925	1206.76	25.2605	1200.22	18.8152	1189.35	27.0293			12.7225	1.34223	2.17555	3.26721	0.20083	2.97877	0.911717	1179.78	32.1149	1173.26	22.7316	1162.09	26.6262
	7.28841	0.963113	7.09403	2.89556	0.375157	2.7307	0.943062	2053.62	48.0243	2123.29	25.7742	2192.19	16.7422			12.5103	1.057	2.20522	3.03887	0.200173	2.84912	0.937559	1176.25	30.6333	1182.7	21.2324	1195.39	20.8507			12.7202	1.24869	2.23477	2.578	0.20626	2.25541	0.874867	1208.86	24.861	1192.02	18.0862	1162.44	24.752
	6.07959	1.08023	10.9138	3.33783	0.481435	3.1582	0.946183	2533.51	66.165	2515.81	31.0567	2502.28	18.1794			12.5001	0.948734	2.19447	2.77571	0.199036	2.60853	0.939773	1170.14	27.9137	1179.29	19.3636	1196.99	18.7113			12.7184	1.096	2.03321	3.14212	0.187631	2.94478	0.937194	1108.53	29.9915	1126.69	21.3894	1162.72	21.7373
	5.73111	0.956805	11.5497	3.29265	0.480282	3.15056	0.956848	2528.49	65.8982	2568.61	30.7783	2601.13	15.9465			12.4801	1.18764	2.2326	2.8682	0.20217	2.61076	0.910244	1186.97	28.3035	1191.34	20.1167	1200.11	23.3943			12.7176	0.833097	2.14072	2.40847	0.197539	2.2598	0.93827	1162.09	24.03	1162.06	16.6702	1162.85	16.5222
	5.5411	1.04545	12.2035	3.70722	0.490647	3.55676	0.959414	2573.47	75.4722	2620.18	34.8052	2657.18	17.331			12.478	1.15855	1.78429	2.62597	0.161547	2.35658	0.897413	965.366	21.1282	1039.74	17.0888	1200.48	22.8202			12.7104	1.11338	2.15398	3.1345	0.19865	2.93009	0.93479	1168.06	31.3039	1166.34	21.7394	1163.98	22.079
	5.52781	1.05999	11.9118	3.28774	0.477768	3.11218	0.946602	2517.54	64.8647	2597.49	30.8072	2661.16	17.5686			12.3786	0.86882	2.33277	2.2815	0.209523	2.1096	0.924653	1226.27	23.5579	1222.32	16.2164	1216.23	17.1023			12.6428	1.13583	2.19046	3.02254	0.20094	2.801	0.926706	1180.37	30.2121	1178.01	21.0739	1174.56	22.4936
	5.47229	1.28181	12.975	3.34784	0.515187	3.09273	0.923799	2678.73	67.7914	2677.84	31.5711	2677.88	21.2086			12.3562	0.980837	2.37771	2.85093	0.213173	2.67689	0.938955	1245.7	30.3222	1235.92	20.3803	1219.77	19.2695			12.6409	1.07669	2.19834	2.95021	0.201633	2.74672	0.931025	1184.09	29.7116	1180.52	20.5927	1174.86	21.3045
	5.47086	1.1608	13.129	2.7391	0.521165	2.48097	0.905761	2704.12	54.796	2688.97	25.8495	2678.31	19.2051			12.2059	1.15746	2.46685	2.22883	0.218474	1.90473	0.854585	1273.81	22.0159	1262.37	16.1047	1243.79	22.685			12.6272	0.78494	2.2292	2.92607	0.204242	2.81882	0.963347	1198.07	30.8191	1190.27	20.5129	1177.01	15.5259
	5.45628	1.23116	11.9404	3.04919	0.472718	2.78958	0.914862	2495.47	57.7234	2599.74	28.5759	2682.72	20.3611			12.1887	0.772039	2.19296	2.44607	0.193944	2.32103	0.948884	1142.7	24.3049	1178.81	17.0599	1246.56	15.1162			12.6234	1.37975	2.09458	3.6973	0.191849	3.4302	0.92776	1131.38	35.5943	1147.03	25.4156	1177.61	27.2703
	5.39512	0.775135	13.2881	2.64431	0.520179	2.52815	0.956072	2699.94	55.7687	2700.34	24.9757	2701.34	12.7988			12.1684	1.0984	2.49932	2.92456	0.22067	2.71045	0.92679	1285.41	31.587	1271.84	21.2125	1249.83	21.5182			12.6071	1.04055	2.12559	3.19232	0.194439	3.01797	0.945386	1145.37	31.6706	1157.15	22.0472	1180.16	20.5909
	5.35358	0.965384	13.1698	3.23988	0.511577	3.09271	0.954575	2663.36	67.4767	2691.9	30.5848	2714.1	15.9211			12.1422	1.06059	2.2828	2.41939	0.201119	2.17453	0.898795	1181.33	23.4722	1206.98	17.0844	1254.01	20.728			12.6052	1.01224	2.05821	2.98166	0.188247	2.80458	0.940611	1111.87	28.6425	1135.02	20.3784	1180.45	20.0311
	5.32494	1.29493	13.3579	3.1976	0.51611	2.92366	0.91433	2682.66	64.161	2705.29	30.2155	2722.94	21.3355			12.1247	1.03056	2.33848	3.06697	0.205728	2.88864	0.941856	1206.02	31.773	1224.06	21.8168	1256.87	20.1323			12.5277	1.29815	2.1497	3.40785	0.195405	3.15091	0.924604	1150.59	33.2031	1164.95	23.6209	1192.6	25.6366
	5.0421	1.10751	15.2272	2.8035	0.557083	2.57547	0.918662	2854.56	59.4012	2829.56	26.7182	2812.49	18.101			12.0847	0.79321	2.34065	2.40031	0.20524	2.26546	0.943819	1203.41	24.8694	1224.72	17.0783	1263.29	15.4952			12.5079	1.11267	2.29339	3.06316	0.208138	2.85393	0.931695	1218.89	31.6957	1210.25	21.6621	1195.72	21.9307
																12.0374	0.717141	2.49283	2.28585	0.217728	2.17045	0.949512	1269.86	25.0169	1269.95	16.5666	1270.94	13.9755			12.4482	1.10647	2.31436	3.45103	0.209038	3.26884	0.947207	1223.69	36.4337	1216.7	24.4734	1205.15	21.7787
																12.0298	1.0334	2.3907	2.7137	0.208675	2.50923	0.924654	1221.76	27.9269	1239.82	19.4303	1272.22	20.1569			12.406	1.21288	2.21318	2.98981	0.199221	2.73274	0.914019	1171.13	29.2654	1185.22	20.913	1211.89	23.8695
																12.0254	0.943089	2.14831	2.15617	0.187449	1.93898	0.899271	1107.54	19.7315	1164.51	14.9404	1272.91	18.3981			12.336	1.01202	2.4489	3.15394	0.219196	2.98716	0.947121	1277.62	34.621	1257.1	22.7429	1222.97	19.8929
																12.0181	0.94712	2.4052	2.70889	0.209737	2.53792	0.936886	1227.42	28.365	1244.15	19.4304	1274.09	18.4563			12.3253	1.1062	2.27094	3.31278	0.203091	3.12263	0.942601	1191.9	33.9809	1203.31	23.3578	1224.68	21.7485
																11.8916	0.892245	2.54337	3.02292	0.219451	2.88824	0.955448	1278.97	33.5065	1284.54	22.0352	1294.68	17.3531			12.3164	1.242	2.25827	2.99205	0.201812	2.7221	0.909776	1185.05	29.467	1199.37	21.0596	1226.09	24.3816
																11.8828	1.30597	2.61931	2.69746	0.225836	2.36024	0.874986	1312.64	28.031	1306.07	19.8245	1296.13	25.3955			12.2457	1.17609	2.32797	3.18097	0.206846	2.95557	0.929141	1211.99	32.6557	1220.86	22.5974	1237.43	23.0619
																11.8315	1.12028	2.56541	3.35028	0.220235	3.15743	0.942437	1283.12	36.7366	1290.84	24.4818	1304.53	21.7572			12.2375	1.1725	2.45838	3.25164	0.218287	3.03289	0.932726	1272.82	35.0314	1259.89	23.4739	1238.74	22.9703
																11.8013	1.40115	2.61338	2.9614	0.22378	2.60896	0.880989	1301.82	30.7543	1304.41	21.7511	1309.49	27.1948			12.2165	1.09175	2.38519	3.34945	0.211425	3.16652	0.945387	1236.4	35.6258	1238.17	23.9675	1242.11	21.3928
																11.7995	1.09316	2.66544	3.07413	0.228202	2.8732	0.934638	1325.07	34.4142	1318.93	22.7022	1309.8	21.216			12.1003	1.09271	2.41926	2.49672	0.212406	2.2449	0.89914	1241.62	25.3534	1248.34	17.9389	1260.8	21.3541
																11.7923	0.968307	2.40024	2.93675	0.205371	2.77253	0.944079	1204.11	30.452	1242.67	21.0525	1310.98	18.7903			11.8542	1.81214	2.10405	2.99181	0.180974	2.38056	0.795693	1072.29	23.5166	1150.13	20.5945	1300.81	35.2148
																11.7397	0.916234	2.64046	2.60692	0.224917	2.4406	0.936202	1307.81	28.8891	1311.99	19.2014	1319.65	17.7568			11.8298	1.2518	2.58153	3.23489	0.221585	2.98286	0.922093	1290.25	34.8797	1295.42	23.6797	1304.82	24.3117
																11.679	0.93893	2.72212	2.89471	0.230675	2.7382	0.945933	1338.04	33.086	1334.51	21.4989	1329.68	18.1712			11.7878	1.15666	2.62328	3.8653	0.22437	3.68818	0.954177	1304.93	43.5702	1307.18	28.423	1311.72	22.4425
																11.6487	0.714934	2.69119	2.37062	0.227463	2.26024	0.95344	1321.19	27.0009	1326.04	17.5514	1334.71	13.8264			11.7589	0.933183	2.67493	3.12461	0.228227	2.98201	0.954361	1325.2	35.7206	1321.56	23.0974	1316.48	18.0939
																11.6241	0.952224	2.72403	2.98306	0.229752	2.827	0.947684	1333.2	34.0478	1335.03	22.1595	1338.8	18.4045			11.7548	1.18067	2.53552	3.134	0.216258	2.90309	0.926323	1262.07	33.2758	1282.29	22.8252	1317.15	22.89
																11.5934	1.00957	2.75733	2.74345	0.231945	2.55093	0.929828	1344.69	30.961	1344.07	20.4453	1343.91	19.4993			11.616	1.19617	2.7055	3.84373	0.228031	3.65286	0.950344	1324.17	43.7263	1329.97	28.5034	1340.14	23.1163
																11.5553	0.85587	2.89743	2.36967	0.24293	2.20971	0.932497	1401.91	27.8414	1381.24	17.8895	1350.26	16.5154			11.5414	1.3133	2.8151	3.83587	0.235743	3.60404	0.939563	1364.53	44.3227	1359.56	28.7473	1352.59	25.3369
																11.1773	1.3738	3.02631	2.78852	0.245435	2.42663	0.870221	1414.89	30.8277	1414.28	21.285	1414.16	26.2786			11.5045	1.11825	2.77952	3.27988	0.23202	3.08336	0.940084	1345.08	37.4331	1350.05	24.4965	1358.76	21.5548
																11.1699	0.913616	2.92239	2.50631	0.23685	2.33386	0.931193	1370.3	28.8105	1387.72	18.9628	1415.43	17.4725			11.5013	1.08485	2.73756	3.32312	0.228454	3.14105	0.945213	1326.39	37.6563	1338.72	24.7193	1359.3	20.9095
																11.0818	0.946301	3.14537	2.41674	0.252912	2.22376	0.920152	1453.47	28.9373	1443.87	18.6216	1430.56	18.0606			11.478	1.05313	2.81215	2.74726	0.234203	2.53739	0.923607	1356.49	31.0394	1358.78	20.5805	1363.2	20.2875
																10.9746	0.920687	3.18094	2.6405	0.253298	2.47479	0.937242	1455.46	32.2432	1452.54	20.4012	1449.09	17.5278			11.3722	1.18079	2.67187	3.24525	0.220469	3.02282	0.931457	1284.35	35.201	1320.71	23.9821	1381.02	22.6898
																10.8895	0.911757	3.3128	2.85369	0.261753	2.70412	0.947586	1498.81	36.1631	1484.07	22.2609	1463.88	17.3232			11.356	1.16201	3.0142	3.25992	0.248363	3.04579	0.934313	1430.03	39.0633	1411.22	24.8598	1383.76	22.3207
																10.8848	0.728755	3.29682	2.35159	0.260377	2.23582	0.95077	1491.77	29.7756	1480.3	18.3226	1464.71	13.8445			11.3418	1.25781	2.96656	3.67205	0.244131	3.44991	0.939504	1408.14	43.6404	1399.1	27.8925	1386.16	24.153
																10.8558	1.07992	3.20021	2.33882	0.252073	2.07458	0.887018	1449.16	26.9245	1457.21	18.0959	1469.78	20.5021			11.1741	1.08198	3.08967	3.29749	0.250502	3.11493	0.944635	1441.06	40.2252	1430.13	25.3004	1414.71	20.6946
																10.8377	1.12827	3.33238	3.24283	0.262046	3.04022	0.937521	1500.3	40.6941	1488.67	25.3322	1472.95	21.4111			11.1708	0.983377	3.04885	2.90583	0.247119	2.73438	0.940997	1423.6	34.9285	1419.94	22.2215	1415.28	18.8071
																10.7746	1.08264	3.30598	3.32676	0.258458	3.14567	0.945565	1481.95	41.6476	1482.47	25.9403	1484.01	20.5146			11.1444	1.33232	2.95511	3.2487	0.238956	2.96293	0.912036	1381.27	36.8389	1396.16	24.6513	1419.79	25.4656
																10.624	1.07272	3.3066	2.51386	0.254893	2.27349	0.904382	1463.66	29.7691	1482.61	19.6007	1510.64	20.2531			11.1341	1.19201	3.13826	3.06525	0.253531	2.82399	0.921289	1456.66	36.8199	1442.12	23.6073	1421.56	22.7781
																10.6145	1.24872	3.26759	3.26212	0.251659	3.01366	0.923834	1447.03	39.0611	1473.37	25.3668	1512.34	23.5711			11.1171	1.07182	3.11859	3.10923	0.251558	2.91865	0.938705	1446.51	37.8175	1437.29	23.9096	1424.48	20.4732
																10.5985	0.799398	3.30762	3.38773	0.25436	3.29207	0.971761	1460.92	43.0348	1482.85	26.4189	1515.17	15.083			11.0588	1.17779	3.06225	3.07226	0.245717	2.83753	0.923598	1416.35	36.0811	1423.3	23.5201	1434.53	22.4668
																10.5756	1.00337	3.45512	2.3579	0.265129	2.13376	0.904941	1516.03	28.8263	1517.04	18.5698	1519.25	18.922			11.0419	1.04013	3.12047	2.84514	0.250007	2.6482	0.930779	1438.51	34.1438	1437.75	21.8814	1437.44	19.833
																10.4984	0.98137	3.3699	2.8925	0.2567	2.72093	0.940685	1472.94	35.829	1497.43	22.6527	1533.06	18.4731			10.97	0.991663	3.05987	2.81802	0.243555	2.63777	0.936037	1405.15	33.3037	1422.7	21.569	1449.88	18.877
																10.4509	0.807432	3.48709	2.8212	0.264428	2.70319	0.958169	1512.46	36.4428	1524.3	22.2655	1541.58	15.183			10.9297	1.18039	3.19608	2.90474	0.253462	2.6541	0.913711	1456.31	34.5972	1456.21	22.4689	1456.88	22.4485
																10.3455	0.750473	3.60083	2.27878	0.270298	2.15165	0.944214	1542.32	29.5142	1549.72	18.1111	1560.62	14.075			10.9113	1.10089	3.15928	3.83659	0.250121	3.67525	0.957947	1439.1	47.4036	1447.27	29.5984	1460.09	20.9276
																10.2079	1.02712	3.53074	3.22116	0.261512	3.05301	0.947799	1497.57	40.7993	1534.13	25.4935	1585.69	19.2013			10.9066	0.803013	2.77678	2.87118	0.219744	2.7566	0.960093	1280.52	32.0143	1349.31	21.4375	1460.91	15.2631
																10.2045	0.871664	3.70595	2.55114	0.274396	2.39761	0.939818	1563.08	33.2792	1572.65	20.4021	1586.32	16.2935			10.9043	0.912375	3.26654	2.32262	0.258449	2.13592	0.919615	1481.9	28.2778	1473.12	18.0579	1461.3	17.341
																10.1403	0.788227	3.75702	2.34897	0.276428	2.21278	0.942018	1573.35	30.8919	1583.61	18.8394	1598.1	14.7126			10.8647	1.2002	3.1998	2.79115	0.252248	2.51993	0.902829	1450.06	32.7225	1457.11	21.596	1468.23	22.7905
																10.1237	0.961031	3.7642	2.8532	0.276504	2.68648	0.941567	1573.73	37.5134	1585.15	22.8939	1601.16	17.9311			10.8282	1.13498	3.2023	3.55752	0.251597	3.37161	0.947742	1446.71	43.6922	1457.72	27.5333	1474.61	21.5336
																10.0916	0.893058	3.70782	2.62765	0.271499	2.47123	0.940473	1548.41	34.0164	1573.06	21.0164	1607.08	16.6484			10.7902	1.05886	3.14724	3.07897	0.246403	2.89117	0.939007	1419.9	36.8456	1444.33	23.7293	1481.28	20.0713
																10.0883	0.9574	3.59712	2.47761	0.263306	2.28515	0.922322	1506.73	30.7036	1548.9	19.6873	1607.69	17.8466			10.676	1.10459	3.33039	3.09282	0.257983	2.88884	0.934048	1479.51	38.1911	1488.2	24.1565	1501.42	20.8805
																10.0606	0.85622	3.54939	2.51113	0.259098	2.36065	0.940074	1485.23	31.3153	1538.3	19.8955	1612.83	15.9497			10.6281	1.02764	3.31133	2.75573	0.255356	2.55695	0.927868	1466.04	33.5292	1483.73	21.4942	1509.91	19.4036
																10.0577	1.04736	3.8431	2.29817	0.280458	2.04563	0.890114	1593.67	28.8835	1601.82	18.519	1613.36	19.5094			10.5169	1.20478	3.39198	3.47714	0.258839	3.26175	0.938056	1483.9	43.2349	1502.54	27.274	1529.74	22.6891
																10.0502	0.802436	3.58134	3.06085	0.261161	2.95379	0.965024	1495.78	39.4313	1545.4	24.3001	1614.75	14.9439			10.4638	1.1934	3.40674	3.27301	0.258651	3.04768	0.931157	1482.94	40.3741	1505.95	25.6975	1539.27	22.4466
																10.031	0.969087	3.90574	2.52362	0.284273	2.33014	0.92333	1612.85	33.2492	1614.87	20.4038	1618.3	18.0397			10.0489	1.08467	3.96046	3.07555	0.288769	2.87793	0.935746	1635.37	41.5701	1626.13	24.9381	1614.99	20.2002
																10.0149	0.989004	3.75681	2.25037	0.272995	2.02139	0.89825	1555.99	27.9447	1583.57	18.0481	1621.29	18.4034			10.0048	1.18623	4.06991	4.2153	0.295448	4.04495	0.959587	1668.69	59.4709	1648.3	34.3723	1623.18	22.0686
																10.0087	0.90706	3.86962	1.86033	0.281017	1.62422	0.873079	1596.48	22.969	1607.37	15.0115	1622.45	16.8759			9.97842	1.10414	3.899	3.17983	0.282294	2.98198	0.937779	1602.91	42.3198	1613.47	25.7023	1628.08	20.5281
																9.98855	1.11744	4.01205	2.45017	0.290774	2.18051	0.889945	1645.4	31.6655	1636.64	19.9174	1626.19	20.7806			9.88931	1.02494	3.98664	2.78477	0.286062	2.58929	0.929805	1621.82	37.128	1631.48	22.6094	1644.74	19.0147
																9.94713	0.904304	3.95677	2.65401	0.285579	2.49519	0.940161	1619.4	35.7318	1625.38	21.5149	1633.92	16.7997			9.84773	0.999733	3.87451	3.07473	0.276847	2.90766	0.945664	1575.47	40.6415	1608.39	24.8204	1652.56	18.5284
																9.94501	0.903446	4.00115	2.77142	0.288721	2.62003	0.945374	1635.13	37.8398	1634.43	22.5174	1634.32	16.7829			9.79466	0.82842	3.99503	2.68472	0.283921	2.55371	0.951202	1611.08	36.4043	1633.19	21.8061	1662.57	15.3334
																9.94164	0.88854	3.93033	2.98651	0.283514	2.85127	0.954716	1609.04	40.601	1619.95	24.1785	1634.95	16.5047			9.76987	1.25996	4.18945	3.48839	0.296984	3.2529	0.932494	1676.34	48.0171	1671.96	28.6026	1667.25	23.3082
																9.92013	0.726904	4.00293	2.48627	0.288126	2.37763	0.956306	1632.16	34.2839	1634.79	20.2017	1638.97	13.4965			9.72378	0.883807	4.19598	2.42369	0.296044	2.2568	0.931143	1671.66	33.2316	1673.23	19.876	1675.99	16.3307
																9.82803	0.866402	3.96651	2.74011	0.282854	2.59953	0.948695	1605.72	36.949	1627.37	22.2241	1656.27	16.0494			9.70285	1.07578	4.11456	3.32639	0.289675	3.14763	0.94626	1639.9	45.5763	1657.2	27.1783	1679.98	19.8684
																9.82172	0.956203	3.93497	2.73737	0.280425	2.56494	0.937006	1593.5	36.2127	1620.9	22.1661	1657.46	17.7104			9.6732	1.01678	4.32637	2.88309	0.303656	2.69785	0.935748	1709.41	40.5098	1698.4	23.7826	1685.63	18.7651
																9.8197	0.993428	4.1807	3.2955	0.297876	3.1422	0.953482	1680.77	46.4903	1670.24	27.0094	1657.84	18.3991			9.56723	0.865087	3.92842	2.71313	0.272704	2.57152	0.947805	1554.51	35.5203	1619.55	21.9624	1705.93	15.9242
																9.60462	3.08781	3.4395	4.11482	0.239698	2.71977	0.660971	1385.12	33.9002	1513.47	32.3809	1698.75	56.9046			9.50209	1.11521	4.47568	2.47235	0.308579	2.20654	0.892488	1733.71	33.5429	1726.47	20.522	1718.5	20.4967
																9.51528	0.759276	4.5836	2.23571	0.316458	2.10283	0.940565	1772.41	32.5864	1746.29	18.6375	1715.94	13.9586			9.46677	1.16106	4.40341	2.63503	0.302468	2.36545	0.897692	1703.53	35.4118	1712.98	21.8074	1725.34	21.3212
																9.4651	0.997066	4.57564	2.72885	0.314243	2.54017	0.930859	1761.55	39.154	1744.84	22.7426	1725.66	18.3085			9.44105	1.16905	4.63176	3.13797	0.317289	2.91208	0.928013	1776.48	45.217	1755.01	26.2106	1730.33	21.4544
																9.45285	0.903779	4.49008	2.95472	0.307967	2.8131	0.952071	1730.7	42.699	1729.14	24.5418	1728.04	16.5903			9.40605	1.03768	4.25702	3.04921	0.290537	2.86721	0.940313	1644.21	41.6116	1685.09	25.0768	1737.14	19.027
																9.40074	1.23881	4.74911	3.17197	0.323938	2.92006	0.920582	1808.93	46.0586	1775.95	26.6115	1738.18	22.7127			9.3403	1.26815	4.61163	3.08735	0.312538	2.81488	0.911745	1753.18	43.2091	1751.37	25.7677	1749.99	23.2164
																9.35173	0.950183	4.52809	3.25921	0.307252	3.11763	0.956559	1727.17	47.2374	1736.15	27.1135	1747.75	17.3994			9.32147	1.10013	4.3679	2.61955	0.295423	2.37734	0.907538	1668.57	34.95	1706.29	21.6467	1753.69	20.1307
																9.22057	1.05129	4.64091	2.62147	0.310491	2.40144	0.916065	1743.12	36.6783	1756.66	21.9026	1773.58	19.1894			9.25886	0.982898	4.76977	2.63117	0.320437	2.44069	0.927606	1791.86	38.1822	1779.59	22.0895	1766.01	17.9577
																9.10848	0.861794	4.77653	2.70872	0.315679	2.56797	0.948039	1768.59	39.7201	1780.78	22.7464	1795.87	15.6887			9.25181	1.0765	4.6669	2.64254	0.313287	2.41333	0.913262	1756.86	37.1127	1761.33	22.1005	1767.4	19.6647
																9.09643	0.991731	4.85994	3.14263	0.320767	2.98204	0.948901	1793.48	46.6878	1795.34	26.4703	1798.28	18.0489			9.23823	1.27346	4.63405	3.39477	0.310626	3.14687	0.926975	1743.78	48.0799	1755.42	28.3592	1770.09	23.2554
																9.05399	1.10678	4.45175	2.74118	0.292455	2.50781	0.914865	1653.78	36.5814	1722.03	22.7318	1806.79	20.1198			9.23197	1.17815	4.45781	3.24177	0.29861	3.02011	0.931623	1684.41	44.7685	1723.15	26.8916	1771.32	21.5113
																9.03784	0.780241	4.75117	2.76637	0.311568	2.65406	0.959401	1748.42	40.644	1776.31	23.2092	1810.03	14.1774			9.2116	0.888528	4.96199	2.45524	0.331649	2.28883	0.932221	1846.37	36.7473	1812.87	20.7515	1775.36	16.2145
																8.98127	0.821205	5.19453	2.08999	0.33851	1.9219	0.919572	1879.5	31.333	1851.72	17.7974	1821.43	14.9011			9.09259	1.22887	5.05175	3.49248	0.333286	3.26914	0.936052	1854.29	52.6812	1828.04	29.6106	1799.05	22.3591
																8.82546	1.18884	4.88927	2.70518	0.31309	2.42995	0.898258	1755.9	37.3504	1800.41	22.8077	1853.13	21.4903			9.07517	1.01072	4.69302	2.69519	0.309026	2.4985	0.927021	1735.91	38.0232	1766	22.5632	1802.54	18.3831
																8.81758	0.836669	5.34079	2.41762	0.341699	2.26824	0.938208	1894.84	37.2391	1875.42	20.6795	1854.74	15.1204			9.0744	1.07881	4.90325	3.20133	0.322841	3.01408	0.941509	1803.59	47.4202	1802.81	27.0057	1802.69	19.6213
																8.77051	0.829503	5.1418	1.7696	0.327211	1.56314	0.88333	1824.85	24.8432	1843.04	15.0438	1864.41	14.9734			9.06705	1.14313	4.86423	2.70835	0.320013	2.45528	0.906561	1789.79	38.372	1796.08	22.8145	1804.17	20.7875
																8.70387	0.879956	5.26396	2.82912	0.332439	2.68879	0.950398	1850.19	43.246	1863.04	24.145	1878.17	15.8579			8.97985	1.28912	5.01249	3.5324	0.326595	3.28877	0.93103	1821.86	52.1954	1821.43	29.9105	1821.72	23.3924
																8.61911	0.831136	5.39405	2.53333	0.337338	2.39311	0.94465	1873.85	38.9143	1883.91	21.7033	1895.78	14.9464			8.97337	1.00074	4.67426	3.29125	0.304338	3.13542	0.952652	1712.79	47.1615	1762.64	27.536	1823.03	18.1559
																8.57902	1.05562	5.40121	3.07176	0.336214	2.88468	0.939096	1868.43	46.7911	1885.05	26.3235	1904.16	18.9651			8.83948	1.16352	5.20048	2.54841	0.333547	2.26729	0.889688	1855.55	36.5578	1852.69	21.7062	1850.26	21.0399
																8.38362	0.893652	5.64188	2.46191	0.343196	2.29399	0.931792	1902.03	37.7848	1922.52	21.2372	1945.45	15.9784			8.74318	0.840868	5.34793	1.91912	0.339268	1.72509	0.8989	1883.15	28.1714	1876.56	16.4181	1870.04	15.1702
																8.31494	0.65864	5.881	2.34653	0.354812	2.2522	0.959799	1957.53	38.0232	1958.43	20.3664	1960.15	11.7539			8.30191	1.14454	5.84404	3.16447	0.352029	2.95024	0.9323	1944.28	49.5195	1952.97	27.4434	1962.95	20.4205
																8.23974	0.836797	5.99328	2.72045	0.358316	2.58855	0.951517	1974.19	44.0198	1974.87	23.6773	1976.34	14.9057			8.27575	0.974496	5.92125	2.72379	0.355556	2.54349	0.933809	1961.08	43.0077	1964.36	23.6652	1968.57	17.3747
																8.20992	0.997474	5.87929	2.33179	0.350228	2.10768	0.903887	1935.69	35.2428	1958.18	20.2376	1982.8	17.7548			8.17357	1.06045	6.12788	2.69246	0.363421	2.47483	0.919172	1998.37	42.5256	1994.23	23.5075	1990.7	18.8586
																8.13309	0.833854	5.54013	2.29829	0.326937	2.14169	0.931861	1823.52	34.0166	1906.85	19.7707	1999.52	14.8132			8.10547	0.987845	6.17027	2.9567	0.362886	2.7868	0.942536	1995.84	47.8346	2000.25	25.8404	2005.56	17.537
																8.11713	0.875262	5.59177	2.7946	0.329337	2.65399	0.949688	1835.17	42.3867	1914.83	24.0756	2003.01	15.5426			8.09468	0.992007	6.05081	3.17569	0.355386	3.01677	0.949959	1960.27	50.9927	1983.19	27.679	2007.92	17.6061
																7.9831	0.952793	6.38384	2.4298	0.369778	2.2352	0.919911	2028.36	38.8983	2030.05	21.3336	2032.53	16.8621			8.05725	1.20366	6.16755	3.35597	0.360568	3.13269	0.933468	1984.87	53.5195	1999.86	29.3299	2016.15	21.3407
																7.89955	0.992043	5.0919	2.37526	0.291857	2.15817	0.908605	1650.8	31.4313	1834.76	20.1616	2051.12	17.5195			8.04962	0.946741	6.45493	2.93807	0.377011	2.78135	0.946661	2062.31	49.0907	2039.78	25.8365	2017.83	16.7855
																7.87357	1.11753	6.53753	2.68195	0.373485	2.43803	0.90905	2045.78	42.7378	2050.97	23.6235	2056.94	19.723			8.03178	0.99509	6.25415	2.39149	0.364475	2.17463	0.90932	2003.35	37.4464	2012.06	20.9383	2021.76	17.6326
																7.57913	0.958969	6.80101	2.64214	0.374008	2.46197	0.931808	2048.23	43.2015	2085.85	23.393	2123.95	16.7965			7.96184	1.3094	5.36238	4.43944	0.309784	4.24194	0.955514	1739.64	64.6781	1878.87	38.0101	2037.24	23.1619
																7.55442	0.975505	6.77436	2.75677	0.371328	2.57841	0.935299	2035.64	45.0083	2082.38	24.3959	2129.67	17.0775			7.92609	1.12446	6.42182	3.44282	0.369322	3.25401	0.945159	2026.21	56.578	2035.26	30.2566	2045.2	19.872
																7.47695	0.81534	7.09937	2.4241	0.385152	2.28287	0.941738	2100.31	40.9203	2123.96	21.5781	2147.69	14.2426			7.7915	0.856496	6.95163	2.44429	0.393003	2.28932	0.936598	2136.74	41.6365	2105.27	21.701	2075.41	15.0836
																7.40565	1.17387	7.63424	3.15647	0.41022	2.93007	0.928275	2215.93	54.9461	2188.9	28.3456	2164.41	20.4691			7.6728	1.08551	6.70732	4.91656	0.373414	4.79523	0.975322	2045.45	84.0507	2073.59	43.4713	2102.41	19.0594
																5.81745	1.06883	11.3448	2.45795	0.47887	2.2134	0.900505	2522.34	46.2032	2551.9	22.9398	2576.18	17.8601			7.3634	0.987926	7.35968	2.71822	0.393211	2.53233	0.931615	2137.7	46.0739	2156.09	24.3034	2174.38	17.2072
																5.6866	0.725316	11.8199	2.41843	0.487701	2.3071	0.953967	2560.72	48.7564	2590.24	22.6446	2614.12	12.0756			6.96721	1.16706	7.7784	3.69305	0.393221	3.50379	0.948754	2137.75	63.7511	2205.71	33.2388	2270.21	20.1176
																5.41953	0.966311	13.0741	2.61655	0.514117	2.43158	0.929307	2674.18	53.2255	2685.02	24.6852	2693.89	15.9633			6.16404	1.15832	8.32268	3.19547	0.372234	2.97814	0.931988	2039.91	52.0788	2266.79	28.9738	2479.03	19.5395
																5.38427	0.737538	13.1944	2.50949	0.515471	2.39866	0.955836	2679.94	52.5962	2693.66	23.6901	2704.67	12.1742			5.92635	1.10017	11.2608	3.14029	0.484221	2.94127	0.936623	2545.62	61.8602	2544.96	29.2935	2545.15	18.4367
																5.3386	0.851839	13.376	2.71627	0.518134	2.57924	0.949553	2691.26	56.7483	2706.57	25.6675	2718.72	14.0423			5.43092	0.965985	13.047	2.79716	0.514127	2.62506	0.938476	2674.23	57.4616	2683.05	26.3859	2690.42	15.9631
																5.26816	0.83709	13.6458	2.36097	0.52161	2.20759	0.935036	2706.01	48.7851	2725.44	22.3396	2740.58	13.768			5.32621	1.09423	13.9334	2.96871	0.538471	2.75969	0.929593	2777.04	62.2681	2745.19	28.1324	2722.55	18.0285
																5.25881	0.844545	13.9234	2.51215	0.531275	2.36594	0.941796	2746.82	52.9172	2744.51	23.8031	2743.51	13.887			5.25334	1.06096	13.5713	3.89528	0.517302	3.74801	0.962193	2687.73	82.3786	2720.26	36.8538	2745.22	17.4437
																5.20422	1.00323	13.1095	2.89009	0.495027	2.71038	0.937818	2592.39	57.8548	2687.56	27.2722	2760.65	16.4743			5.23913	1.08834	14.1547	3.45069	0.538082	3.27457	0.948959	2775.42	73.8516	2760.13	32.7371	2749.67	17.8868
																5.16517	0.818336	13.7708	2.05689	0.516099	1.88709	0.91745	2682.61	41.4117	2734.08	19.4737	2773.02	13.4191			5.20819	1.11907	10.9014	3.35777	0.411963	3.16581	0.942829	2223.89	59.5456	2514.76	31.2394	2759.4	18.3787
																															5.20318	1.0066	14.3805	2.85686	0.542915	2.67365	0.93587	2795.64	60.6493	2775.15	27.1285	2760.98	16.5291
																															5.17057	1.02813	14.1162	2.87347	0.529594	2.68325	0.933798	2739.74	59.8905	2757.54	27.2531	2771.3	16.863
																															4.76287	0.987668	15.3181	2.91741	0.529372	2.74514	0.940951	2738.81	61.2552	2835.23	27.8145	2905.2	16.01

## Sheet: B. Dewey Bridge, UT
	B. Dewey Bridge, UT
						UT16-DB-1Jes															UT16-DB-2Jw															UT16-DB-3Jmt
				Isotope ratios						Apparent ages (Ma)									Isotope ratios						Apparent ages (Ma)									Isotope ratios						Apparent ages (Ma)									Isotope ratios
	206Pb*	±	207Pb*	±	206Pb*	±	error	206Pb*	±	207Pb*	±	206Pb*	±			206Pb*	±	207Pb*	±	206Pb*	±	error	206Pb*	±	207Pb*	±	206Pb*	±			206Pb*	±	207Pb*	±	206Pb*	±	error	206Pb*	±	207Pb*	±	206Pb*	±			206Pb*	±	207Pb*	±
	207Pb*	(%)	235U*	(%)	238U	(%)	corr.	238U*	(Ma)	235U	(Ma)	207Pb*	(Ma)			207Pb*	(%)	235U*	(%)	238U	(%)	corr.	238U*	(Ma)	235U	(Ma)	207Pb*	(Ma)			207Pb*	(%)	235U*	(%)	238U	(%)	corr.	238U*	(Ma)	235U	(Ma)	207Pb*	(Ma)			207Pb*	(%)	235U*	(%)
	20.1388	1.57018	0.270265	3.183	0.0394922	2.76876	0.869858	249.684	6.78099	242.906	6.87652	178.874	36.6227			21.9612	4.5203	0.158739	5.35552	0.0252945	2.87202	0.536273	161.031	4.56756	149.598	7.44966	NA	NA			20.3308	0.845066	0.17365	2.03399	0.0256163	1.85013	0.909606	163.054	2.97887	162.581	3.05573	156.717	19.7588			21.0317	1.54887	0.192288	3.04941
	18.5682	1.36852	0.345025	3.00203	0.0464843	2.67196	0.890049	292.901	7.65106	300.972	7.81941	364.997	30.8544			20.5662	1.19649	0.17375	2.90164	0.0259278	2.64347	0.911026	165.011	4.30667	162.668	4.36138	129.705	28.1251			20.2795	1.0333	0.178668	2.41222	0.0262901	2.1797	0.903609	167.287	3.59946	166.914	3.71282	162.614	24.147			19.3928	1.02584	0.286394	2.41361
	18.8676	0.800994	0.365413	2.0074	0.0500253	1.84067	0.916942	314.677	5.65306	316.248	5.45491	328.837	18.1818			20.2662	1.13748	0.177547	2.44562	0.026108	2.16499	0.885252	166.143	3.55102	165.948	3.74417	164.156	26.6074			20.0836	1.2834	0.251612	2.39791	0.0366656	2.02555	0.844715	232.132	4.61829	227.885	4.89471	185.272	29.8778			19.5689	0.936436	0.284403	2.63226
	18.615	1.03432	0.42981	2.29212	0.0580534	2.04549	0.892398	363.777	7.23495	363.041	6.99637	359.308	23.3418			19.5783	1.03	0.257581	2.90906	0.0365911	2.72061	0.93522	231.668	6.19087	232.716	6.05013	244.289	23.7102			19.6728	1.21777	0.269446	3.2959	0.0384615	3.06267	0.929239	243.289	7.31231	242.251	7.10343	233.223	28.107			19.1399	0.92992	0.329717	2.15871
	18.8622	1.3679	0.446525	2.8273	0.0611118	2.47436	0.875169	382.383	9.18641	374.843	8.86201	329.466	31.0342			19.5836	1.10884	0.2771	2.86546	0.0393746	2.64223	0.922094	248.955	6.45257	248.354	6.31309	243.68	25.539			19.7069	1.01716	0.286725	2.49396	0.0409988	2.27711	0.913049	259.021	5.78126	255.978	5.64291	229.183	23.5079			18.049	2.98408	0.40359	3.76754
	19.2699	1.31957	0.468904	3.31685	0.0655619	3.04307	0.917456	409.362	12.0699	390.431	10.7513	280.777	30.2024			19.6324	1.45252	0.284671	3.32325	0.0405512	2.989	0.899423	256.249	7.50905	254.356	7.47742	237.926	33.4785			19.2944	0.837634	0.315161	1.98967	0.0441217	1.80476	0.907065	278.33	4.9163	278.173	4.84136	277.869	19.1612			18.9048	1.07268	0.389979	1.80681
	18.2824	1.09427	0.501007	3.78887	0.0664606	3.62741	0.957386	414.796	14.5725	412.384	12.8417	399.856	24.5196			19.6229	1.37902	0.310698	2.99906	0.0442373	2.6632	0.888013	279.044	7.27298	274.722	7.21868	239.043	31.797			18.8393	1.1815	0.34871	2.40145	0.0476669	2.0907	0.870599	300.181	6.13203	303.751	6.30457	332.247	26.7912			18.9713	1.111	0.39117	2.2255
	18.2561	1.08946	0.504337	2.73161	0.066806	2.50495	0.917023	416.884	10.1123	414.634	9.29901	403.081	24.3984			16.3961	1.5097	0.441876	2.92261	0.052569	2.50249	0.856252	330.274	8.05694	371.574	9.09462	638.901	32.4769			18.9137	1.29667	0.36568	2.96619	0.0501839	2.66776	0.899388	315.651	8.21795	316.447	8.06474	323.279	29.451			18.6545	1.06674	0.403001	2.06158
	18.3731	1.25945	0.504314	2.97166	0.0672314	2.69157	0.905746	419.454	10.9304	414.619	10.1159	388.753	28.2765			18.7569	1.39447	0.425689	3.35262	0.0579351	3.04886	0.909394	363.056	10.7631	360.111	10.1647	342.173	31.5584			18.9468	1.04495	0.379936	2.50245	0.0522317	2.27384	0.908645	328.208	7.27615	326.991	6.99608	319.348	23.7448			18.722	1.08489	0.405573	2.26341
	18.1491	1.15234	0.525187	2.03409	0.0691604	1.6762	0.824054	431.096	6.98972	428.61	7.11211	416.223	25.7467			18.6867	1.85162	0.432551	3.48516	0.0586487	2.9526	0.847191	367.403	10.5446	364.986	10.6855	350.625	41.8313			18.5401	1.13817	0.398403	3.24456	0.0535948	3.03837	0.936453	336.554	9.96343	340.489	9.38615	368.399	25.6429			18.3224	0.836873	0.4272	2.34957
	18.2609	1.11767	0.534611	2.67455	0.0708349	2.42982	0.908496	441.184	10.3614	434.865	9.46089	402.489	25.0323			10.843	3.47476	0.748117	4.4067	0.0588584	2.71017	0.615012	368.679	9.7115	567.131	19.1511	1472.01	65.9645			18.6848	0.985504	0.423407	2.50627	0.0574031	2.30438	0.919446	359.813	8.06432	358.485	7.56999	350.857	22.2613			18.5737	1.06167	0.43725	2.3645
	17.6504	1.10046	0.625632	2.21192	0.0801239	1.91874	0.867456	496.862	9.17536	493.371	8.64382	478.141	24.304			18.7254	0.984109	0.440176	2.25444	0.059806	2.02831	0.899695	374.445	7.37855	370.377	6.9966	345.978	22.2548			11.2513	9.21938	0.710704	9.78124	0.0580202	3.26738	0.334046	363.574	11.5506	545.164	41.2836	1401.53	177.007			18.3921	0.841089	0.443629	2.16914
	17.3096	1.28615	0.661697	2.94993	0.0831064	2.65479	0.899949	514.638	13.1314	515.652	11.928	521.082	28.228			15.7024	1.42746	0.534533	2.4886	0.0609015	2.0385	0.819135	381.105	7.54365	434.813	8.80226	731.191	30.2453			15.3915	1.35209	0.521856	2.40936	0.0582799	1.99422	0.827694	365.156	7.0796	426.39	8.38917	773.376	28.4529			18.7776	0.919135	0.443176	2.06466
	17.3965	1.27929	0.660036	2.88929	0.0833137	2.59064	0.896635	515.872	12.8436	514.636	11.6652	510.109	28.1136			19.3356	2.22878	0.435613	3.56497	0.0611147	2.78237	0.780473	382.401	10.3304	367.154	10.9841	272.944	51.0635			18.6965	0.873319	0.434086	2.45769	0.0588876	2.2973	0.934737	368.857	8.23588	366.074	7.55381	349.477	19.743			18.0388	1.00385	0.484353	1.96121
	17.267	0.997719	0.67791	2.51522	0.0849328	2.30887	0.91796	525.499	11.6517	525.51	10.3187	526.534	21.882			18.0963	1.28371	0.47539	3.09399	0.0624205	2.81511	0.909865	390.329	10.6622	394.905	10.1229	422.734	28.6499			18.4359	1.05014	0.444	2.41383	0.0593931	2.17343	0.900405	371.934	7.85493	373.069	7.53634	381.084	23.6085			17.5711	1.35149	0.51539	2.08094
	17.5087	1.03035	0.671668	2.97887	0.085329	2.79501	0.938277	527.853	14.1657	521.726	12.1537	495.96	22.6938			19.0233	1.44737	0.452745	2.93734	0.0624923	2.55599	0.870172	390.765	9.69124	379.2	9.29525	310.169	32.9388			17.9785	1.14057	0.457206	3.10551	0.059642	2.88848	0.930114	373.448	10.4805	382.313	9.89391	437.292	25.4115			18.1462	0.999245	0.501855	2.25404
	17.0775	1.26556	0.690584	3.30402	0.0855713	3.05204	0.923733	529.292	15.5088	533.151	13.705	550.673	27.6511			19.116	2.35337	0.458977	3.40645	0.0636613	2.46284	0.722991	397.854	9.50226	383.546	10.8816	299.059	53.6853			18.2273	1.41277	0.46085	3.02385	0.0609495	2.67353	0.884146	381.397	9.90098	384.849	9.68629	406.613	31.6197			18.2414	0.96015	0.5106	2.77927
	14.4755	1.83514	0.822135	3.66905	0.0863507	3.17714	0.865929	533.918	16.2799	609.239	16.8107	901.17	37.8237			18.3689	1.12335	0.477912	2.42988	0.0636971	2.15463	0.886722	398.07	8.3175	396.639	7.97854	389.264	25.2174			17.7972	0.795819	0.482178	1.86596	0.0622655	1.68774	0.904491	389.389	6.37734	399.566	6.16375	459.814	17.6471			17.8113	1.25457	0.527852	2.47661
	17.2097	0.990312	0.750204	2.8538	0.0936787	2.67646	0.937859	577.257	14.7785	568.343	12.4213	533.783	21.6908			18.0858	0.952482	0.49401	3.30714	0.0648277	3.16702	0.957628	404.919	12.4294	407.64	11.1041	424.032	21.2529			18.2905	0.914308	0.473671	2.18151	0.0628622	1.98067	0.907933	393.008	7.55166	393.721	7.11986	398.864	20.4907			18.2077	0.753971	0.517305	2.14454
	16.8695	1.16634	0.775916	3.11049	0.0949741	2.88354	0.927037	584.888	16.123	583.151	13.8	577.362	25.3493			17.8604	1.99659	0.5117	3.45783	0.0663124	2.82316	0.816454	413.9	11.3178	419.591	11.8851	451.94	44.3581			18.2232	0.985014	0.48893	3.13611	0.0646485	2.9774	0.949394	403.834	11.6549	404.181	10.457	407.117	22.0433			18.2618	0.808736	0.52537	2.45234
	15.9974	1.42392	0.834977	3.38398	0.0969198	3.06982	0.907162	596.332	17.4852	616.37	15.6364	691.582	30.3609			18.0064	1.21163	0.514932	2.5197	0.0672766	2.20926	0.876796	419.727	8.97745	421.76	8.69654	433.842	26.9887			18.0511	0.966571	0.494627	2.4363	0.0647841	2.23635	0.917932	404.655	8.77134	408.059	8.1868	428.316	21.5507			17.5885	1.09803	0.55639	2.45054
	16.8341	0.985886	0.809271	2.77002	0.0988488	2.58863	0.934519	607.659	15.0115	602.045	12.5813	581.929	21.3896			18.1677	1.40786	0.512858	3.14047	0.0676058	2.80722	0.893885	421.715	11.4596	420.369	10.8104	413.942	31.4697			17.9872	1.06525	0.497167	2.99434	0.0648862	2.79845	0.93458	405.273	10.9922	409.783	10.0966	436.217	23.7276			17.3645	0.840612	0.585209	2.67253
	16.1808	1.25322	0.849446	2.8773	0.0997297	2.59004	0.900162	612.824	15.1413	624.345	13.4195	667.262	26.819			18.1497	0.892868	0.516658	2.51447	0.0680393	2.3506	0.934831	424.333	9.65318	422.916	8.69765	416.155	19.9494			18.1798	0.963885	0.493722	3.18051	0.0651268	3.03093	0.952971	406.729	11.9469	407.444	10.6747	412.45	21.5508			17.4672	0.912793	0.58638	2.23435
	16.6906	0.984595	0.860193	2.53732	0.104173	2.3385	0.92164	638.82	14.2225	630.228	11.9142	600.446	21.3108			17.9526	1.35941	0.531328	3.55871	0.0692116	3.28883	0.924165	431.404	13.7239	432.691	12.5383	440.494	30.2669			18.2136	0.985965	0.49579	2.44504	0.065521	2.23743	0.915089	409.115	8.86923	408.849	8.22909	408.298	22.0594			17.5915	0.874475	0.657026	2.47367
	14.2834	1.38912	1.49169	3.09361	0.154596	2.76419	0.893517	926.674	23.8592	927.006	18.8074	928.675	28.523			17.8338	1.22257	0.548087	2.88339	0.0709219	2.61137	0.90566	441.708	11.1483	443.743	10.3658	455.278	27.1527			18.083	0.818637	0.500768	2.23048	0.0657045	2.07482	0.930212	410.225	8.24628	412.222	7.55719	424.371	18.2643			17.2859	0.957996	0.67387	2.12526
	14.264	0.853684	1.49341	1.46228	0.154563	1.18722	0.811895	926.494	10.2456	927.704	8.89317	931.455	17.5402			17.843	1.72754	0.552369	3.50779	0.0715131	3.0529	0.870321	445.265	13.1347	446.547	12.6742	454.147	38.346			18.2319	0.86875	0.496754	2.63775	0.0657144	2.49058	0.944207	410.285	9.9001	409.503	8.88926	406.05	19.445			17.3097	0.854345	0.682497	2.21676
	14.2145	0.995849	1.49161	2.08576	0.153842	1.83266	0.878658	922.464	15.7518	926.973	12.6792	938.586	20.3972			17.9	0.925479	0.554522	2.61192	0.0720213	2.44247	0.935121	448.322	10.578	447.955	9.46074	447.018	20.5775			18.1785	1.18618	0.498505	3.30946	0.0657528	3.08958	0.93356	410.517	12.2879	410.69	11.1793	412.613	26.5193			16.426	1.0837	0.750001	2.25457
	13.774	1.33735	1.5335	2.78534	0.15326	2.44328	0.877193	919.214	20.9313	943.9	17.1203	1002.81	27.1487			17.0293	1.07734	0.657066	2.52515	0.0811881	2.28379	0.904419	503.211	11.0552	512.818	10.1672	556.81	23.5055			17.8197	1.19364	0.509509	2.92308	0.0658781	2.66826	0.912826	411.275	10.6312	418.119	10.0185	457.015	26.5032			16.1059	1.54245	0.767929	3.20699
	13.7471	2.60479	1.6541	3.8767	0.164991	2.87122	0.740633	984.456	26.2135	991.12	24.537	1006.76	52.8721			17.1615	1.15525	0.670615	2.873	0.0835055	2.6305	0.915594	517.013	13.069	521.086	11.7107	539.952	25.2678			17.7958	0.992593	0.511811	2.27699	0.0660869	2.04925	0.899984	412.537	8.18911	419.666	7.82728	460.008	22.0305			16.9378	1.13344	0.73154	2.43397
	13.7062	1.24625	1.67799	3.19133	0.166876	2.93793	0.920598	994.878	27.0852	1000.22	20.3067	1012.81	25.2435			17.5302	1.0595	0.656995	3.17305	0.0835676	2.99094	0.942606	517.382	14.8699	512.774	12.7753	493.227	23.3592			18.0589	1.28917	0.504832	3.54688	0.0661494	3.3043	0.931607	412.915	13.2162	414.968	12.0825	427.351	28.7486			16.6006	0.895692	0.754135	1.87491
	13.6668	1.10825	1.68444	2.42282	0.167036	2.1545	0.889251	995.76	19.8789	1002.66	15.4379	1018.64	22.4281			17.0147	1.50125	0.677343	3.31052	0.0836222	2.95055	0.891267	517.707	14.678	525.167	13.5749	558.675	32.7319			17.9335	0.833036	0.512249	2.85921	0.0666552	2.73516	0.956616	415.973	11.0182	419.961	9.83438	442.864	18.5257			16.4516	1.94514	0.795404	3.12847
	13.5321	0.897603	1.74292	2.24941	0.171132	2.06256	0.916934	1018.35	19.429	1024.54	14.5141	1038.67	18.1407			16.9467	1.01715	0.68886	2.89106	0.0847039	2.70622	0.936066	524.139	13.623	532.116	11.9741	567.436	22.1516			18.1505	1.2041	0.506479	2.72812	0.0667018	2.44802	0.897326	416.254	9.86796	416.079	9.31332	416.059	26.9037			16.8169	0.870189	0.787621	2.56935
	13.5025	1.16902	1.84241	2.9672	0.180505	2.72721	0.919119	1069.73	26.8819	1060.72	19.5313	1043.09	23.6065			17.4159	1.2406	0.671894	3.00662	0.0849051	2.73873	0.910902	525.334	13.8169	521.863	12.2693	507.68	27.2986			17.8264	1.0283	0.524199	2.67563	0.0678027	2.47014	0.923199	422.904	10.111	427.953	9.34379	456.184	22.8162			16.7959	1.00568	0.796858	2.77274
	13.32	1.30161	1.77349	3.24809	0.171404	2.97589	0.916196	1019.84	28.0706	1035.8	21.0923	1070.53	26.1556			17.0401	0.982207	0.689255	2.71594	0.0852197	2.53211	0.932316	527.204	12.8181	532.353	11.2526	555.413	21.44			18.0994	2.16754	0.518838	3.48209	0.0681373	2.7252	0.782633	424.924	11.2066	424.375	12.0785	422.345	48.4028			16.8001	0.814622	0.817743	2.45252
	13.3124	1.07852	1.75433	2.30522	0.169456	2.03736	0.883803	1009.11	19.031	1028.76	14.9097	1071.67	21.6679			17.4177	0.974077	0.680763	3.25315	0.0860348	3.10389	0.954119	532.044	15.851	527.235	13.3798	507.407	21.4376			17.8381	1.21986	0.526782	2.48902	0.0681816	2.16959	0.871667	425.191	8.92727	429.671	8.72011	454.725	27.0955			16.4484	0.941223	0.861313	1.99676
	13.2396	1.31197	1.82302	3.16916	0.175128	2.88484	0.910285	1040.3	27.7148	1053.77	20.7832	1082.66	26.2966			16.9437	1.17788	0.702523	4.19671	0.0863688	4.02803	0.959805	534.026	20.6439	540.297	17.5853	567.817	25.6416			17.6899	1.14824	0.535261	2.71995	0.0687036	2.4657	0.906524	428.341	10.2184	435.295	9.62913	473.224	25.4026			16.3548	0.87415	0.877151	2.21696
	13.221	1.06574	1.8715	2.67904	0.179531	2.45793	0.917469	1064.41	24.1169	1071.06	17.731	1085.5	21.3503			17.2427	1.19745	0.699662	3.64856	0.0875351	3.44646	0.944609	540.943	17.8827	538.589	15.2514	529.61	26.2467			17.7895	0.893574	0.536811	2.60678	0.0692905	2.44885	0.939413	431.88	10.2296	436.32	9.24588	460.762	19.8119			16.3435	1.11151	0.880578	3.08071
	13.0414	1.0039	2.05286	2.73157	0.194254	2.5404	0.930016	1144.38	26.6377	1133.25	18.6528	1112.83	20.0493			17.2799	1.47966	0.708406	3.2142	0.0888199	2.85336	0.887736	548.554	15.0048	543.799	13.5338	524.855	32.4344			17.8201	0.985068	0.538031	2.89739	0.0695674	2.72479	0.940431	433.549	11.4248	437.126	10.2918	456.987	21.8542			16.4485	0.920262	0.885757	2.46572
	13.003	0.946056	2.04984	2.53523	0.193398	2.3521	0.927766	1139.76	24.5721	1132.24	17.3034	1118.75	18.8932			16.5431	1.17702	0.740199	2.97115	0.088849	2.72806	0.918185	548.727	14.3502	562.522	12.833	619.637	25.4123			17.8859	1.5053	0.536055	2.87796	0.069568	2.4529	0.852305	433.552	10.2849	435.82	10.1984	448.768	33.466			15.831	1.02531	0.995198	2.56413
	12.9129	0.936029	2.07078	1.7302	0.19402	1.45515	0.841026	1143.12	15.2427	1139.19	11.8476	1132.59	18.6474			16.8132	1.10053	0.73218	3.11501	0.0893215	2.91412	0.93551	551.523	15.4037	557.832	13.3702	584.582	23.879			17.0992	1.37196	0.571389	2.65989	0.0708916	2.27875	0.856711	441.525	9.72445	458.913	9.82098	547.9	29.9839			13.9819	1.04369	1.48197	2.52842
	12.9124	1.0823	2.0955	2.78019	0.196329	2.56087	0.921115	1155.57	27.0921	1147.33	19.1123	1132.65	21.5475			17.0884	1.17916	0.736893	2.76722	0.0913677	2.50341	0.904668	563.621	13.5105	560.591	11.9213	549.283	25.75			17.672	1.12957	0.553089	2.73008	0.0709199	2.48544	0.910391	441.695	10.6104	447.018	9.87228	475.484	25.0016			13.8666	1.08238	1.54285	2.37433
	12.8468	0.908813	2.08655	2.64641	0.194496	2.48547	0.939184	1145.68	26.0888	1144.39	18.1672	1142.79	18.0573			17.0626	1.12959	0.754448	3.60286	0.0934033	3.42121	0.94958	575.633	18.84	570.802	15.7326	552.532	24.6539			17.6088	0.917397	0.55722	2.88705	0.0711942	2.73741	0.94817	443.347	11.7283	449.716	10.49	483.399	20.2387			13.7922	0.989678	1.70243	3.34003
	12.8363	0.98675	2.12617	2.83338	0.198028	2.656	0.937398	1164.72	28.3014	1157.34	19.5692	1144.41	19.5925			16.8216	1.13567	0.772487	2.83396	0.0942856	2.59646	0.916194	580.833	14.4217	581.189	12.5416	583.502	24.6571			17.5275	1.15707	0.565658	2.92285	0.0719385	2.68407	0.918306	447.824	11.6119	455.202	10.7228	493.612	25.4989			13.7887	1.30934	1.69037	2.90146
	12.8309	1.02463	2.11333	2.88333	0.196748	2.69513	0.934728	1157.83	28.5634	1153.16	19.8757	1145.28	20.3525			17.0431	1.24173	0.762828	2.87671	0.0943326	2.59491	0.902042	581.11	14.4196	575.64	12.6405	555.033	27.077			17.2532	1.35067	0.577041	2.78658	0.0722379	2.43736	0.874677	449.624	10.5855	462.558	10.3533	528.276	29.6012			13.7432	1.05461	1.72691	2.67937
	12.8248	1.04135	2.01768	2.72324	0.187755	2.51627	0.923999	1109.2	25.6414	1121.48	18.4903	1146.23	20.6727			16.4824	1.30136	0.805372	3.42282	0.0963172	3.16578	0.924903	592.79	17.9295	599.854	15.5052	627.565	28.0607			17.8573	1.04631	0.564475	2.70835	0.073139	2.49807	0.922361	455.039	10.9753	454.435	9.92257	452.322	23.2322			13.7422	0.704901	1.66016	2.11387
	12.6863	1.09695	2.14708	2.8983	0.197639	2.68269	0.925609	1162.62	28.5389	1164.11	20.0803	1167.73	21.7275			16.8034	0.913032	0.791668	2.84515	0.0965223	2.69467	0.94711	593.996	15.291	592.118	12.7657	585.893	19.7946			17.3001	1.15309	0.585514	3.34443	0.0734978	3.13936	0.938684	457.195	13.8559	467.999	12.5412	522.284	25.2841			13.6916	0.85776	1.72411	2.76792
	12.6319	1.17203	2.2094	2.55898	0.202503	2.2748	0.888948	1188.75	24.695	1184.02	17.8892	1176.27	23.1992			16.6489	1.16912	0.800054	3.17146	0.0966481	2.9481	0.929573	594.736	16.749	596.859	14.3137	605.857	25.2952			17.6331	0.866721	0.593358	2.57284	0.0759161	2.42246	0.94155	471.7	11.0187	473.01	9.72881	480.309	19.1724			13.6279	0.873927	1.7318	2.83333
	12.1928	0.921677	2.37854	2.72853	0.210426	2.56815	0.941221	1231.09	28.7808	1236.17	19.5071	1245.91	18.0688			16.4736	1.20522	0.817082	3.20982	0.0976655	2.97496	0.926831	600.713	17.0636	606.419	14.6565	628.718	25.9706			17.2297	1.00669	0.610188	2.40848	0.0762833	2.188	0.908457	473.9	9.99697	483.679	9.2677	531.267	22.0513			13.6073	0.915245	1.66792	2.45169
	12.0084	1.01136	2.6381	2.81906	0.22986	2.63139	0.93343	1333.77	31.7041	1311.33	20.7592	1275.65	19.7046			16.2677	1.35263	0.835847	3.2252	0.09866	2.92785	0.907804	606.551	16.9491	616.851	14.911	655.793	29.0371			17.1153	0.887948	0.628954	2.37479	0.0781071	2.20253	0.927466	484.814	10.2865	495.444	9.31058	545.832	19.3813			13.5941	0.900257	1.77169	2.17466
	11.8133	0.914739	2.61958	2.52627	0.224539	2.35485	0.932143	1305.82	27.8358	1306.15	18.5666	1307.52	17.7574			16.1607	0.988129	0.846796	3.34442	0.0992946	3.19511	0.955356	610.274	18.6044	622.889	15.572	669.896	21.1569			17.1734	1.70367	0.668822	3.38473	0.0833402	2.92471	0.864088	516.03	14.5041	519.996	13.7747	538.387	37.2558			13.5875	1.08298	1.81898	2.57858
	11.5087	1.16214	2.83635	2.97576	0.236851	2.73945	0.920588	1370.31	33.8177	1365.21	22.3429	1358.05	22.4029			16.6465	1.00805	0.822183	3.20635	0.0993065	3.04377	0.949294	610.344	17.7252	609.265	14.6909	606.178	21.803			17.1968	0.897351	0.668228	2.52301	0.0833796	2.35804	0.934613	516.264	11.699	519.634	10.262	535.427	19.6421			13.5787	0.950858	1.74287	2.22745
	11.4657	0.972481	2.67964	2.57329	0.222928	2.38246	0.925841	1297.33	27.9969	1322.86	19.0301	1365.27	18.7273			16.8158	1.07735	0.815196	2.79996	0.0994645	2.5844	0.923011	611.27	15.0718	605.364	12.7686	584.243	23.3753			16.8246	0.790536	0.683711	2.63385	0.0834653	2.51242	0.953894	516.774	12.4768	529.015	10.8603	583.106	17.1438			13.5635	0.875744	1.76367	2.42193
	11.4003	1.13123	2.83242	3.11472	0.234294	2.90203	0.931715	1356.96	35.5114	1364.16	23.3782	1376.28	21.7516			16.5433	1.17983	0.829043	3.73578	0.0995148	3.54458	0.948819	611.565	20.681	613.081	17.1951	619.603	25.4725			17.1836	1.21187	0.66948	2.7714	0.0834718	2.4924	0.899327	516.812	12.3782	520.396	11.2851	537.132	26.5066			13.4815	0.918532	1.83832	2.49991
	11.3215	1.01979	2.93216	3.03257	0.240869	2.85596	0.941763	1391.21	35.7379	1390.25	22.9652	1389.59	19.5718			16.6526	1.32939	0.827154	2.81787	0.0999437	2.48458	0.881721	614.079	14.5531	612.032	12.9535	605.384	28.7565			17.2286	1.13997	0.669566	3.19013	0.0837011	2.97949	0.933973	518.176	14.8348	520.448	12.9913	531.408	24.9804			13.4288	0.979511	1.69506	2.37278
	11.2354	0.751922	3.10929	2.24572	0.253476	2.1161	0.942281	1456.38	27.5854	1434.99	17.2553	1404.24	14.402			16.7327	1.10462	0.823776	2.38245	0.100015	2.1109	0.88602	614.494	12.3723	610.153	10.9272	595.032	23.9219			17.3419	1.05577	0.665853	3.18002	0.0837842	2.99965	0.943279	518.671	14.9489	518.188	12.907	516.994	23.1898			13.3587	0.848894	1.84665	3.7779
	11.1998	0.975088	3.0386	2.18325	0.246929	1.9534	0.894722	1422.62	24.9369	1417.37	16.6807	1410.31	18.6612			16.6496	1.07905	0.841899	3.30217	0.101707	3.12089	0.945104	624.404	18.573	620.193	15.327	605.777	23.3243			17.2179	1.00807	0.671153	3.16144	0.0838474	2.99641	0.9478	519.047	14.9431	521.413	12.8927	532.769	22.0614			13.2915	0.699048	1.89553	2.07497
	11.1984	0.988245	2.87357	2.47167	0.23349	2.2655	0.91659	1352.76	27.6451	1375.01	18.62	1410.54	18.9124			16.3337	0.960328	0.858435	2.91501	0.101737	2.75229	0.944176	624.583	16.3838	629.268	13.6728	647.098	20.6396			17.4223	1.21224	0.665442	2.93551	0.0841208	2.67352	0.910751	520.672	13.373	517.937	11.9101	506.84	26.679			13.0946	0.909021	1.89146	3.18891
	11.1928	0.947827	3.10815	2.73607	0.252421	2.56665	0.93808	1450.95	33.3476	1434.71	21.022	1411.52	18.1365			16.5232	1.08407	0.851197	3.38524	0.10205	3.20697	0.947338	626.411	19.1437	625.306	15.8064	622.227	23.3931			16.9195	1.03239	0.689812	2.76407	0.0846848	2.56403	0.927629	524.025	12.9046	532.688	11.4575	570.916	22.4623			13.0507	0.79147	1.92092	2.23008
	11.1478	0.973278	3.03677	2.99089	0.245635	2.82811	0.945572	1415.93	35.9516	1416.91	22.8498	1419.21	18.6041			15.9715	1.21325	0.88584	3.09994	0.102657	2.85265	0.920229	629.96	17.1205	644.132	14.7864	695.086	25.8503			16.9448	0.970606	0.689078	3.05149	0.0847213	2.89301	0.948065	524.242	14.5661	532.247	12.641	567.678	21.1401			12.8568	0.805861	2.13065	2.35229
	11.1013	1.03743	3.11596	2.47957	0.250987	2.25211	0.908266	1443.57	29.1279	1436.64	19.0624	1427.21	19.8089			16.4068	1.18445	0.868159	2.95467	0.10335	2.70687	0.916133	634.011	16.3449	634.567	13.9428	637.504	25.4857			16.7522	1.51101	0.703461	3.04642	0.0855066	2.64529	0.868326	528.907	13.4326	540.856	12.7747	592.468	32.739			12.8225	0.869065	2.14763	2.61841
	11.0112	0.965263	3.10205	2.56616	0.24784	2.3777	0.926558	1427.33	30.4432	1433.2	19.7068	1442.75	18.3922			16.367	1.11863	0.875514	2.84951	0.103973	2.62075	0.919722	637.649	15.9113	638.557	13.5073	642.729	24.0639			17.0672	1.3187	0.717433	2.58302	0.0888445	2.22104	0.859862	548.7	11.6826	549.15	10.9566	551.947	28.7989			12.8061	1.09431	2.06142	2.63488
	10.9607	0.954182	3.11384	2.90611	0.24764	2.74499	0.944561	1426.3	35.1233	1436.11	22.3388	1451.5	18.1595			16.2592	0.898875	0.882405	3.24434	0.104101	3.11734	0.960853	638.398	18.9474	642.281	15.4435	656.894	19.272			16.5702	0.969461	0.749974	2.61615	0.0901702	2.42989	0.928805	556.543	12.9561	568.209	11.3848	616.095	20.954			12.7854	1.08317	2.08925	2.65017
	10.8563	0.933796	3.09721	3.09483	0.243973	2.95059	0.953394	1407.32	37.3046	1432	23.759	1469.68	17.7281			16.587	1.02517	0.868739	3.37904	0.104555	3.21978	0.952867	641.048	19.6473	634.883	15.9514	613.912	22.1659			16.9963	0.929307	0.737889	3.06807	0.0909984	2.92394	0.953024	561.439	15.7216	561.173	13.2278	561.024	20.2379			12.7806	1.00414	2.13028	2.66271
	10.4741	1.14205	3.52786	3.25701	0.268111	3.05022	0.936509	1531.21	41.5731	1533.48	25.7727	1537.42	21.4857			16.5794	1.17614	0.872115	3.39026	0.104913	3.17971	0.937895	643.139	19.463	636.715	16.0376	614.897	25.4025			16.4064	1.57879	0.769871	3.25066	0.0916473	2.84151	0.874135	565.272	15.3782	579.689	14.3584	637.551	33.9912			12.7768	1.09581	2.04617	2.30444
	10.1117	1.04432	3.79166	2.83052	0.278189	2.63083	0.929449	1582.24	36.9114	1590.98	22.7464	1603.38	19.478			16.5208	0.882782	0.886727	2.33855	0.106294	2.16553	0.926013	651.188	13.4128	644.61	11.1603	622.548	19.0611			16.5234	1.361	0.770598	2.82349	0.0923881	2.47381	0.876157	569.645	13.4873	580.106	12.478	622.202	29.3795			12.5929	0.872016	2.15199	1.68043
	9.90881	1.2352	3.9234	2.92272	0.28208	2.64889	0.906307	1601.83	37.5702	1618.52	23.6534	1641.09	22.9252			16.1762	1.375	0.907052	3.66397	0.106462	3.39618	0.926914	652.171	21.0654	655.489	17.6968	667.857	29.4367			16.5131	1.37063	0.788521	3.07509	0.0944781	2.75273	0.895172	581.967	15.3182	590.333	13.7668	623.544	29.5598			12.3481	1.06902	2.14456	2.53367
	9.85663	0.888837	4.06771	2.74921	0.290915	2.60156	0.946294	1646.1	37.7943	1647.85	22.4102	1650.88	16.4764			15.4673	1.00919	1.0752	3.27667	0.120668	3.11739	0.951389	734.405	21.6384	741.288	17.2398	763.033	21.2723			16.8589	0.822391	0.780575	2.52516	0.0954843	2.38749	0.94548	587.891	13.4149	585.811	11.2406	578.72	17.8546			12.3449	0.727106	2.35662	2.25049
	9.8451	1.02204	4.05638	2.06147	0.289765	1.79028	0.868446	1640.36	25.9285	1645.58	16.7937	1653.05	18.9407			14.622	1.28245	1.42911	3.12617	0.151622	2.85101	0.911982	910.047	24.1975	901.18	18.6772	880.382	26.5184			16.6097	0.910596	0.795067	2.85628	0.0958196	2.70724	0.94782	589.864	15.2602	594.042	12.8463	610.953	19.685			12.2985	0.885334	2.32847	2.58595
	9.7926	0.990909	4.13103	2.32437	0.293525	2.10257	0.904576	1659.12	30.7569	1660.46	19.0038	1662.96	18.3405			14.124	1.05772	1.54681	2.58758	0.15852	2.36153	0.912638	948.544	20.8301	949.223	15.9588	951.707	21.6454			16.2613	1.25937	0.818515	2.55943	0.0965763	2.22815	0.870566	594.314	12.6502	607.22	11.6978	656.598	27.0319			12.1264	0.997902	2.21906	3.10816
	9.78228	0.887519	4.12205	2.90813	0.292577	2.7694	0.952293	1654.4	40.4104	1658.68	23.768	1664.9	16.4225			14.0334	1.20088	1.55004	3.43861	0.157831	3.2221	0.937036	944.713	28.3145	950.508	21.2262	964.857	24.5015			15.8223	1.57409	0.847957	4.84427	0.0973492	4.5814	0.945736	598.855	26.2003	623.527	22.5742	715.027	33.44			12.0019	0.67828	2.54513	2.07366
	9.66354	0.966945	4.43949	2.64517	0.311284	2.4621	0.930791	1747.02	37.6781	1719.74	21.9243	1687.47	17.8411			14.0133	1.39716	1.67819	3.39234	0.170635	3.09126	0.911248	1015.61	29.0472	1000.3	21.5871	967.779	28.5165			16.8793	0.950077	0.795687	2.50803	0.0974505	2.32111	0.925473	599.45	13.2866	594.393	11.2847	576.062	20.6329			11.8476	0.993958	2.63212	2.6788
	9.63428	1.17963	4.36708	3.32685	0.30528	3.1107	0.935026	1717.44	46.9005	1706.13	27.493	1693.06	21.7506			13.8406	1.19405	1.49503	2.6768	0.150139	2.39573	0.894997	901.741	20.1604	928.365	16.2876	993.014	24.2763			16.8764	1.06177	0.801072	2.97863	0.0980933	2.78297	0.93431	603.225	16.0261	597.433	13.4528	576.431	23.082			11.7062	1.12682	2.55498	2.79316
	9.58268	1.0331	4.36203	2.33214	0.303294	2.09083	0.89653	1707.62	31.3662	1705.18	19.2662	1702.96	19.0245			13.8172	1.06683	1.56413	3.12102	0.156813	2.93302	0.939765	939.041	25.6304	956.105	19.3335	996.478	21.6784			16.6309	0.800456	0.818114	2.46196	0.0987227	2.3282	0.94567	606.919	13.4855	606.996	11.2492	608.201	17.3072			11.562	1.27981	2.58236	2.37644
	9.57886	1.00972	4.22245	3.35636	0.293472	3.20088	0.953676	1658.86	46.8172	1678.39	27.5611	1703.69	18.5922			13.7178	1.12667	1.77816	2.75076	0.176988	2.50944	0.912272	1050.5	24.3259	1037.51	17.8789	1011.1	22.8377			16.4623	1.3892	0.839223	2.63318	0.100243	2.2369	0.849508	615.836	13.1381	618.717	12.2004	630.231	29.9273			11.5121	0.881116	2.9341	2.33457
	9.19861	1.13925	4.90552	2.93137	0.327412	2.70093	0.92139	1825.83	42.9465	1803.21	24.7294	1777.93	20.784			13.7148	1.0812	1.55321	3.44518	0.154563	3.27113	0.949479	926.492	28.2297	951.771	21.2838	1011.55	21.9203			16.5913	0.933861	0.840908	2.65027	0.101232	2.48029	0.935863	621.624	14.6981	619.646	12.293	613.349	20.1738			11.294	0.86528	2.97155	2.31069
	8.88383	1.03342	5.17416	2.76653	0.333524	2.56627	0.927612	1855.44	41.3764	1848.38	23.5454	1841.2	18.7074			13.6378	1.11801	1.72751	2.92352	0.170943	2.7013	0.923989	1017.31	25.422	1018.82	18.8035	1022.95	22.6458			16.6835	1.094	0.836631	2.94904	0.101277	2.73862	0.928646	621.887	16.2354	617.285	13.6411	601.366	23.6701			11.164	0.732966	3.06418	2.20234
	8.78735	0.861061	5.3946	2.34119	0.343957	2.1771	0.92991	1905.68	35.9186	1884	20.0571	1860.95	15.5496			13.6336	1.07184	1.72346	3.24785	0.170491	3.06589	0.943976	1014.81	28.7879	1017.32	20.8721	1023.57	21.7082			16.729	1.22196	0.835305	3.10378	0.101392	2.85311	0.919238	622.56	16.9316	616.551	14.3445	595.491	26.4564			11.0905	0.740145	3.09094	2.39841
	8.72126	0.761232	5.32246	2.35234	0.336805	2.22577	0.946192	1871.28	36.1504	1872.48	20.1101	1874.57	13.7259			13.6328	0.976985	1.76287	3.9712	0.174379	3.84914	0.969265	1036.19	36.8446	1031.9	25.7338	1023.69	19.7703			16.7013	1.03371	0.841044	2.87154	0.101919	2.67903	0.932959	625.648	15.9736	619.722	13.3206	599.063	22.3634			11.0283	0.871595	3.11671	2.42568
	8.65018	0.781637	5.26778	2.51296	0.330629	2.38831	0.950396	1841.43	38.2558	1863.66	21.4483	1889.31	14.067			13.6189	0.830791	1.79149	2.59968	0.177028	2.46336	0.947561	1050.72	23.8838	1042.37	16.9422	1025.76	16.8058			16.2954	1.58759	0.867785	3.17101	0.102604	2.74496	0.865645	629.651	16.4665	634.364	14.9604	652.13	34.0987			10.8363	0.843973	3.21752	2.67185
	8.64561	0.876776	5.4641	1.86972	0.342769	1.6514	0.883234	1899.98	27.1753	1894.97	16.0492	1890.26	15.7777			13.6033	1.16022	1.73336	3.4147	0.171088	3.21156	0.940508	1018.1	30.246	1021	21.9909	1028.08	23.4813			16.2597	0.937626	0.871459	2.3902	0.102812	2.19861	0.919846	630.87	13.2133	636.359	11.3018	656.85	20.1014			10.82	0.991011	3.35775	2.17136
	7.75808	0.943909	6.57802	2.94957	0.370286	2.79446	0.947412	2030.75	48.68	2056.41	26.003	2082.98	16.6091			13.5996	1.01804	1.74822	3.15477	0.172509	2.986	0.946502	1025.92	28.3208	1026.51	20.3799	1028.62	20.605			16.4811	1.28981	0.861808	2.46669	0.103058	2.1026	0.852399	632.308	12.6637	631.109	11.5941	627.738	27.8178			10.076	0.688923	3.92994	1.82919
	5.75357	0.887218	11.1628	2.83916	0.466012	2.69698	0.94992	2466.05	55.267	2536.81	26.4642	2594.62	14.7957			13.5854	1.13624	1.72831	3.39295	0.170365	3.19704	0.94226	1014.12	30.0005	1019.12	21.8274	1030.74	22.987			15.7847	0.827808	0.978366	2.16224	0.112053	1.9975	0.923811	684.662	12.9749	692.767	10.8579	720.066	17.5508			9.97021	0.66639	4.03542	2.05262
	5.61118	0.799242	11.8327	2.4972	0.481754	2.36585	0.947399	2534.9	49.5864	2591.25	23.3844	2636.32	13.2747			13.5781	1.09519	1.686	3.12825	0.166106	2.93028	0.936713	990.62	26.9077	1003.25	19.9407	1031.82	22.1539			14.2371	0.806243	1.48334	2.34411	0.153232	2.2011	0.93899	919.055	18.8535	923.598	14.2181	935.349	16.5371			9.96734	0.865432	3.84665	2.21975
	4.6011	1.33861	17.6621	3.23272	0.589645	2.94255	0.910239	2987.98	70.3638	2971.51	31.0753	2961.07	21.5942			13.5646	0.98441	1.75772	3.32232	0.173	3.17313	0.955094	1028.62	30.1687	1030.01	21.5048	1033.82	19.909			14.2036	0.716544	1.48331	2.65243	0.152868	2.55381	0.962819	917.023	21.8296	923.583	16.0883	940.193	14.6838			9.84339	1.02624	3.98607	2.73035
																13.527	1.06654	1.86024	2.74322	0.182583	2.5274	0.921326	1081.07	25.1549	1067.07	18.1177	1039.43	21.5494			14.1105	0.980228	1.56458	2.38851	0.160187	2.1781	0.911909	957.817	19.3864	956.284	14.7969	953.656	20.0502			9.69913	0.832111	4.10516	2.44875
																13.5121	1.23138	1.82803	2.90507	0.179223	2.63119	0.905722	1062.73	25.7793	1055.57	19.0694	1041.65	24.8694			14.0677	0.804517	1.56661	2.45486	0.159908	2.31928	0.944773	956.268	20.612	957.084	15.2156	959.829	16.4395			9.69572	0.847934	4.19667	2.56423
																13.4854	1.11734	1.89536	2.27189	0.185457	1.97814	0.870702	1096.72	19.9496	1079.46	15.1021	1045.69	22.5537			14.0659	0.925723	1.53073	3.09319	0.156227	2.95141	0.954166	935.775	25.7077	942.792	18.9994	960.127	18.8964			9.60447	0.634184	4.37341	1.60542
																13.4498	0.920509	1.83684	2.80919	0.179257	2.6541	0.94479	1062.91	26.0079	1058.73	18.4712	1051.02	18.5685			13.9704	1.03176	1.59549	2.99876	0.16173	2.81568	0.938947	966.385	25.2691	968.448	18.7196	974.032	21.0423			9.49089	0.798454	4.51307	3.602
																13.436	1.19031	1.87238	2.86597	0.182537	2.60709	0.909673	1080.82	25.9426	1071.37	18.9716	1053.09	23.9992			13.9018	1.15997	1.61674	2.60944	0.163079	2.33744	0.895764	973.865	21.1276	976.725	16.3717	984.045	23.5962			8.99437	0.933445	5.09169	2.32973
																13.417	1.37881	1.80035	3.09596	0.175268	2.77198	0.895352	1041.07	26.6487	1045.59	20.2129	1055.93	27.7662			13.8703	1.03187	1.6234	3.23078	0.16338	3.06157	0.947624	975.535	27.7168	979.309	20.3028	988.656	20.9924			8.69811	1.05739	5.37705	2.68169
																13.4159	0.832162	1.8437	2.32964	0.179473	2.17595	0.934026	1064.09	21.3441	1061.18	15.3376	1056.09	16.7761			13.8165	0.899499	1.74088	2.28393	0.174524	2.09934	0.91918	1036.99	20.1093	1023.79	14.7307	996.556	18.2696			8.65069	0.808576	5.39687	2.47861
																13.3414	1.14636	1.77015	3.34635	0.171356	3.14387	0.939492	1019.58	29.648	1034.57	21.7157	1067.3	23.0466			13.8096	1.04838	1.75096	2.81664	0.175447	2.61426	0.928149	1042.05	25.1543	1027.52	18.2054	997.559	21.2803			8.63879	1.01133	5.44922	2.57438
																13.3127	1.02149	1.86494	3.37399	0.180143	3.21565	0.953068	1067.75	31.6426	1068.74	22.3045	1071.64	20.5042			13.7805	0.986372	1.74522	2.63226	0.174503	2.44047	0.927136	1036.87	23.3744	1025.4	16.9931	1001.85	20.0068			7.79546	0.926144	6.51467	2.42626
																13.2932	0.82675	1.80461	2.63104	0.17406	2.49777	0.949347	1034.44	23.8715	1047.13	17.1913	1074.58	16.5829			13.7504	0.826899	1.68432	2.37724	0.168046	2.22879	0.937554	1001.34	20.6708	1002.62	15.147	1006.28	16.7782			7.38777	0.738329	7.33757	2.13763
																13.2784	0.858367	1.82031	3.26347	0.17538	3.14856	0.96479	1041.69	30.2856	1052.8	21.3906	1076.81	17.2306			13.7329	0.883672	1.68799	3.02341	0.168197	2.89139	0.956334	1002.17	26.8368	1004	19.2806	1008.87	17.9027			6.02691	0.784529	11.158	2.06714
																13.2483	0.975545	1.94688	2.85965	0.187149	2.6881	0.940012	1105.91	27.318	1097.37	19.1854	1081.35	19.5518			13.7215	1.11924	1.78158	2.68099	0.177376	2.43619	0.908689	1052.62	23.6597	1038.75	17.4374	1010.55	22.6752			5.53489	0.784097	12.8531	2.13176
																13.2291	1.16892	1.89247	3.11331	0.181655	2.88553	0.926838	1076.01	28.5959	1078.45	20.6858	1084.28	23.4258			13.7214	0.986207	1.64118	2.61358	0.163397	2.42037	0.926075	975.629	21.9139	986.168	16.4916	1010.56	19.9771			5.37226	0.954655	13.429	2.10098
																13.2106	1.12421	1.92027	3.14931	0.184065	2.94182	0.934115	1089.15	29.4804	1088.16	21.0304	1087.06	22.5161			13.7143	0.841292	1.69756	2.61396	0.168923	2.47488	0.946792	1006.17	23.0556	1007.61	16.7041	1011.61	17.0375			5.28538	0.884702	13.5757	2.30922
																13.175	0.7118	1.87652	2.43455	0.179387	2.32817	0.956304	1063.63	22.8281	1072.83	16.1276	1092.45	14.2735			13.7048	0.878988	1.68873	2.48887	0.167927	2.32849	0.93556	1000.68	21.5824	1004.29	15.8738	1013.02	17.8079			5.2164	0.77744	14.0635	2.44245
																13.1643	1.56833	1.92761	3.9371	0.184122	3.61125	0.917235	1089.45	36.1983	1090.71	26.3275	1094.11	31.4037			13.6872	1.06572	1.69224	2.70318	0.168061	2.48423	0.919004	1001.42	23.0416	1005.61	17.2542	1015.62	21.5725			5.14816	0.954183	14.2226	2.61583
																13.1374	0.890623	1.96201	2.69734	0.187024	2.54607	0.943916	1105.23	25.86	1102.57	18.1438	1098.18	17.8223			13.6826	0.822569	1.73322	2.31021	0.172073	2.15881	0.934464	1023.52	20.4311	1020.95	14.8762	1016.3	16.6641			5.04993	0.753909	13.879	2.39069
																13.0937	0.985319	1.94311	2.35397	0.184607	2.13783	0.908181	1092.09	21.4766	1096.07	15.7818	1104.83	19.7109			13.6769	1.02404	1.55955	2.46348	0.154765	2.24056	0.909508	927.619	19.3578	954.288	15.2422	1017.16	20.7295
																13.057	1.32509	1.94293	2.87804	0.184072	2.55485	0.887705	1089.18	25.6033	1096.01	19.2955	1110.44	26.4874			13.6616	1.07482	1.73927	2.91517	0.172408	2.7098	0.929549	1025.37	25.6884	1023.19	18.7965	1019.41	21.7644
																13.0026	1.09449	1.87741	2.96322	0.177124	2.75368	0.929287	1051.24	26.711	1073.15	19.6338	1118.82	21.8397			13.6527	0.916674	1.76019	2.94836	0.174368	2.80223	0.950439	1036.13	26.8218	1030.92	19.0933	1020.73	18.5585
																12.9838	1.11678	2.03728	2.75751	0.191929	2.52124	0.914318	1131.82	26.1713	1128.05	18.7829	1121.69	22.2644			13.6489	0.88615	1.77606	2.79766	0.17589	2.65361	0.94851	1044.48	25.5877	1036.74	18.176	1021.31	17.9385
																12.9638	1.18511	1.80144	3.42133	0.16945	3.20952	0.938091	1009.08	29.9793	1045.98	22.3426	1124.74	23.623			13.647	1.15743	1.75175	2.76518	0.173459	2.51129	0.908183	1031.14	23.9302	1027.81	17.8757	1021.58	23.4474
																12.8911	1.38667	2.06649	3.20774	0.19329	2.89253	0.901735	1139.18	30.2039	1137.77	21.9527	1135.94	27.5956			13.6418	0.951841	1.74633	2.60386	0.172857	2.42366	0.930792	1027.83	23.0268	1025.81	16.8136	1022.35	19.2657
																12.8821	0.931132	2.07377	2.88101	0.193836	2.72639	0.946332	1142.12	28.5364	1140.18	19.7387	1137.37	18.5064			13.6157	0.689599	1.75888	2.72017	0.173766	2.63131	0.967332	1032.83	25.1117	1030.44	17.6106	1026.23	13.9488
																12.8486	1.13767	2.19208	2.89845	0.204362	2.66584	0.919747	1198.71	29.1607	1178.53	20.2132	1142.51	22.5985			13.5935	0.954481	1.61688	1.98628	0.159476	1.74192	0.876974	953.867	15.4448	976.782	12.462	1029.53	19.3166
																12.8224	1.00732	2.08225	2.68006	0.193726	2.48355	0.926678	1141.53	25.9823	1142.98	18.386	1146.59	20.0133			13.5822	0.864754	1.76909	2.92278	0.174345	2.79192	0.955229	1036	26.7201	1034.19	18.9622	1031.2	17.4977
																12.8111	1.09651	2.143	2.62962	0.199203	2.39009	0.908913	1171.04	25.5941	1162.79	18.2074	1148.31	21.7793			13.5229	1.00389	1.80887	2.74999	0.177486	2.5602	0.930987	1053.23	24.8773	1048.67	17.9838	1040.05	20.2828
																12.6997	1.32053	2.15142	3.00035	0.198247	2.69412	0.897936	1165.9	28.7342	1165.51	20.8009	1165.64	26.1713			13.5092	1.07366	1.80329	2.41322	0.17676	2.16122	0.895577	1049.25	20.9274	1046.65	15.7637	1042.09	21.6848
																12.6917	0.874118	2.1521	3.0953	0.198185	2.96931	0.959296	1165.56	31.6609	1165.73	21.4615	1166.89	17.3292			13.4873	0.914425	1.8134	3.07499	0.177462	2.93587	0.954761	1053.09	28.5244	1050.3	20.1276	1045.4	18.4631
																12.6864	0.967213	2.1057	2.67434	0.193831	2.49331	0.932309	1142.09	26.0962	1150.67	18.4133	1167.72	19.1754			13.4759	0.96157	1.74135	2.47204	0.170267	2.27736	0.921247	1013.58	21.3598	1023.96	15.9457	1047.11	19.4083
																12.6692	0.907694	2.14883	2.87795	0.197533	2.73106	0.94896	1162.05	29.0405	1164.68	19.9444	1170.4	17.9895			13.4755	0.958247	1.79412	2.36003	0.175421	2.15674	0.913859	1041.91	20.7494	1043.32	15.3882	1047.17	19.3411
																12.6625	1.10151	2.02789	2.82044	0.186316	2.59645	0.920584	1101.39	26.2876	1124.91	19.1824	1171.49	21.8095			13.465	0.937609	1.6926	2.2187	0.165367	2.01085	0.906319	986.532	18.3943	1005.74	14.1625	1048.74	18.9211
																12.6587	1.15981	2.14332	3.5396	0.196863	3.34419	0.944793	1158.44	35.4595	1162.9	24.5113	1172.08	22.9437			13.4468	0.890435	1.71869	2.89993	0.167689	2.75985	0.951692	999.367	25.5495	1015.54	18.6168	1051.46	17.9616
																12.6563	1.21052	2.07228	2.71159	0.190302	2.42639	0.894821	1123.01	25.0073	1139.69	18.5733	1172.46	23.9605			13.4337	0.809125	1.71849	2.12799	0.167506	1.96816	0.924892	998.353	18.2033	1015.46	13.6598	1053.44	16.3198
																12.6429	0.869783	2.11184	3.52147	0.193729	3.41236	0.969017	1141.55	35.6999	1152.68	24.2706	1174.56	17.2239			13.4198	1.01332	1.69233	2.48021	0.164785	2.26376	0.912729	983.316	20.6454	1005.64	15.831	1055.51	20.4262
																12.6321	1.09146	2.10267	2.92228	0.192723	2.7108	0.927632	1136.11	28.2367	1149.68	20.1115	1176.24	21.6102			13.4093	1.14869	1.48125	2.68291	0.144119	2.42456	0.903707	867.912	19.6881	922.742	16.2641	1057.1	23.1465
																12.6221	1.03422	2.20746	2.8366	0.202167	2.64134	0.931165	1186.95	28.6346	1183.41	19.8251	1177.81	20.4606			13.4076	1.02352	1.87595	2.88318	0.182499	2.69539	0.934868	1080.61	26.8165	1072.63	19.0982	1057.35	20.6084
																12.4377	1.19426	2.228	4.29982	0.201069	4.13064	0.960654	1181.06	44.5779	1189.89	30.1432	1206.85	23.5209			13.3965	1.10456	1.68843	2.95138	0.164121	2.73689	0.927327	979.637	24.8739	1004.17	18.823	1059.01	22.2334
																12.1507	1.96868	1.965	2.99769	0.173242	2.26062	0.754123	1029.95	21.5185	1103.6	20.1749	1252.64	38.52			13.3757	0.955788	1.82887	2.7627	0.177496	2.5921	0.938249	1053.28	25.1884	1055.87	18.1376	1062.13	19.2392
																12.0874	1.12846	2.46508	3.10547	0.216199	2.89319	0.931642	1261.76	33.1548	1261.85	22.436	1262.88	22.0369			13.372	1.0896	1.71731	2.90806	0.166622	2.69622	0.927154	993.471	24.8243	1015.02	18.6635	1062.7	21.9391
																11.972	0.917532	2.57661	2.64269	0.223822	2.4783	0.937793	1302.04	29.2186	1294.02	19.3333	1281.57	17.8699			13.3346	1.03953	1.79567	2.82157	0.173737	2.6231	0.929659	1032.67	25.0298	1043.89	18.4038	1068.33	20.8913
																11.8188	0.89413	2.56625	2.95535	0.22007	2.81685	0.953135	1282.25	32.7538	1291.07	21.5969	1306.62	17.3608			13.3333	0.926293	1.89015	3.19562	0.182862	3.05842	0.957068	1082.59	30.4795	1077.63	21.2238	1068.52	18.612
																11.793	0.918858	2.65641	2.27885	0.227304	2.08539	0.915107	1320.35	24.8979	1316.43	16.8122	1310.86	17.8302			13.3224	1.05515	1.80131	3.03762	0.174124	2.84847	0.937731	1034.79	27.2318	1045.93	19.8356	1070.18	21.1839
																11.7854	1.04872	2.73332	3.48527	0.233735	3.32375	0.953656	1354.04	40.5932	1337.56	25.9153	1312.11	20.3469			13.3103	0.949913	1.82735	2.64416	0.176481	2.46764	0.933241	1047.72	23.8624	1055.33	17.3541	1071.99	19.0645
																11.5466	1.2705	2.69028	2.60735	0.225392	2.27687	0.873248	1310.31	26.9975	1325.79	19.3028	1351.72	24.5141			13.2717	0.745408	1.82179	2.60655	0.175433	2.49769	0.958237	1041.98	24.0311	1053.33	17.0887	1077.79	14.9424
																11.441	1.18098	2.7871	2.84065	0.231368	2.58352	0.909482	1341.66	31.2931	1352.09	21.2303	1369.43	22.7295			13.2425	0.804865	1.94073	2.35672	0.186477	2.21502	0.939875	1102.26	22.4421	1095.25	15.7936	1082.24	16.1452
																11.3427	0.879642	2.82239	3.00452	0.232286	2.87287	0.956182	1346.47	34.91	1361.5	22.5299	1386	16.8903			13.2422	1.55604	1.8331	3.18352	0.17613	2.77732	0.872406	1045.8	26.8118	1057.39	20.9182	1082.28	31.1943
																11.1915	1.0515	3.01326	3.25019	0.244687	3.0754	0.946222	1411.02	38.9741	1410.98	24.7836	1411.74	20.1197			13.2377	0.995446	1.73982	2.08252	0.16711	1.8292	0.87836	996.17	16.8839	1023.4	13.4285	1082.94	19.9541
																11.1831	1.04554	3.09096	2.73796	0.25081	2.53047	0.924217	1442.65	32.7097	1430.45	21.0081	1413.16	20.0018			13.2355	1.1109	1.83154	2.80178	0.175892	2.57213	0.918035	1044.49	24.8023	1056.83	18.4037	1083.27	22.2755
																11.173	1.03087	2.9202	3.5269	0.236739	3.37288	0.956331	1369.72	41.6215	1387.16	26.6825	1414.9	19.7164			13.2228	1.03527	1.84899	2.45802	0.177397	2.22937	0.906978	1052.74	21.6534	1063.07	16.1993	1085.2	20.7453
																11.1532	1.03389	3.10148	2.70981	0.250989	2.50482	0.924354	1443.57	32.3966	1433.06	20.8093	1418.29	19.7652			13.2175	1.01864	1.86989	3.04823	0.17933	2.87299	0.942512	1063.31	28.1625	1070.49	20.169	1086.02	20.4086
																11.0523	1.15756	3.17385	3.6955	0.254522	3.50953	0.949676	1461.75	45.9009	1450.82	28.5409	1435.65	22.0775			13.2105	1.24495	1.86488	2.77194	0.178755	2.47664	0.893468	1060.17	24.2112	1068.72	18.3233	1087.07	24.9356
																11.0367	1.10896	3.14178	3.19818	0.251596	2.99976	0.937959	1446.7	38.873	1442.99	24.638	1438.33	21.1429			13.1904	1.25003	1.88818	2.73421	0.180713	2.43173	0.889374	1070.87	23.9928	1076.94	18.1521	1090.15	25.0257
																10.9297	1.11588	3.21109	3.49734	0.254653	3.31455	0.947732	1462.43	43.3685	1459.84	27.085	1456.88	21.2218			13.1563	0.786739	1.93827	2.33977	0.185027	2.20354	0.941774	1094.38	22.1792	1094.4	15.6733	1095.34	15.7314
																10.9249	1.05887	2.78918	2.67963	0.221096	2.46154	0.918614	1287.66	28.7316	1352.64	20.0305	1457.72	20.1352			13.1483	0.956989	1.9466	2.91338	0.185709	2.75172	0.944511	1098.09	27.783	1097.28	19.545	1096.54	19.1575
																10.9066	0.985464	3.11016	2.69135	0.246127	2.50444	0.930552	1418.47	31.8882	1435.2	20.6816	1460.91	18.7312			13.1292	0.657737	1.8736	2.72984	0.178486	2.64942	0.970539	1058.7	25.8673	1071.8	18.0744	1099.44	13.1408
																10.8905	0.950027	2.93238	2.73999	0.231715	2.57001	0.937966	1343.48	31.1675	1390.31	20.7493	1463.72	18.0508			13.0924	0.910783	1.93678	2.10435	0.183988	1.89704	0.901485	1088.72	19.0037	1093.89	14.0924	1105.03	18.2065
																10.8563	0.949288	3.33807	3.38265	0.262945	3.24671	0.959815	1504.89	43.5762	1490	26.4353	1469.69	18.0222			13.0838	1.10952	2.01396	3.04055	0.191193	2.83089	0.931044	1127.84	29.291	1120.23	20.6327	1106.36	22.1751
																10.8335	0.898629	3.17039	2.38823	0.249213	2.21271	0.926508	1434.41	28.4564	1449.98	18.4369	1473.67	17.0513			13.082	1.15106	1.94983	2.3477	0.18508	2.04616	0.871559	1094.67	20.6002	1098.39	15.7582	1106.61	23.0231
																10.788	1.08595	3.17906	2.52901	0.248844	2.28399	0.903116	1432.51	29.3382	1452.09	19.5368	1481.66	20.5838			13.0718	1.05491	1.85691	2.68088	0.176122	2.4646	0.919326	1045.75	23.7918	1065.89	17.6948	1108.18	21.0688
																10.7813	0.922979	3.28825	2.45056	0.257232	2.2701	0.926359	1475.67	29.9416	1478.27	19.0823	1482.83	17.4919			13.0642	0.954378	1.86201	2.50787	0.176504	2.31918	0.924759	1047.85	22.4293	1067.7	16.5686	1109.34	19.0846
																10.3265	1.06146	2.86406	3.35135	0.214596	3.17882	0.948517	1253.26	36.2058	1372.51	25.2277	1564.08	19.8994			13.0399	0.920483	1.77022	2.47906	0.167489	2.30184	0.928512	998.264	21.2877	1034.6	16.0867	1113.07	18.3653
																10.3074	1.09695	3.79488	2.86054	0.283814	2.64185	0.92355	1610.54	37.6499	1591.66	22.9918	1567.55	20.5556			13.0357	1.30803	2.0732	2.98323	0.196093	2.68118	0.898751	1154.3	28.3365	1139.99	20.4374	1113.71	26.1016
																10.2835	0.89062	3.74854	3.16009	0.279698	3.03199	0.959463	1589.84	42.7203	1581.8	25.335	1571.89	16.6792			13.0303	0.905916	1.92337	2.55422	0.181846	2.38817	0.93499	1077.05	23.688	1089.24	17.0651	1114.53	18.0737
																10.2664	0.974645	3.56016	3.07298	0.2652	2.91432	0.94837	1516.39	39.38	1540.7	24.3648	1575.01	18.2456			12.9784	0.906532	1.96799	2.66357	0.185323	2.50455	0.940301	1095.99	25.2431	1104.62	17.9349	1122.53	18.0775
																10.1452	1.12799	3.64685	2.90895	0.268452	2.68135	0.921759	1532.94	36.5821	1559.82	23.1847	1597.21	21.0572			12.9597	1.08208	1.96703	3.61008	0.184968	3.4441	0.954021	1094.06	34.6567	1104.29	24.3063	1125.39	21.5632
																10.0661	0.89434	3.98572	2.82164	0.291109	2.67615	0.94844	1647.07	38.898	1631.29	22.9078	1611.8	16.6621			12.859	0.994369	2.00603	3.36372	0.187167	3.21339	0.955307	1106.01	32.6591	1117.55	22.7964	1140.92	19.7543
																10.0119	1.1881	3.89481	3.4309	0.282938	3.21862	0.938126	1606.14	45.7595	1612.61	27.7266	1621.85	22.1071			12.841	1.02519	1.99707	2.96932	0.186072	2.78673	0.938507	1100.06	28.1828	1114.52	20.0928	1143.7	20.3651
																9.89575	0.939637	3.99839	2.80076	0.287092	2.63843	0.942042	1626.98	37.9386	1633.87	22.7527	1643.54	17.4363			12.7892	0.8541	2.07407	2.39086	0.192465	2.23309	0.934014	1134.72	23.2345	1140.28	16.3806	1151.72	16.9563
																9.83891	1.38681	3.97323	3.41416	0.283647	3.11982	0.913787	1609.71	44.4414	1628.75	27.703	1654.22	25.698			12.7829	0.930896	2.09573	3.09638	0.19438	2.95313	0.953738	1145.06	30.9823	1147.41	21.2872	1152.69	18.497
																9.79088	1.04156	4.04909	3.21621	0.287651	3.04288	0.946109	1629.78	43.8206	1644.12	26.1948	1663.28	19.2774			12.7826	1.02211	2.115	2.53392	0.196163	2.31863	0.915036	1154.68	24.512	1153.71	17.471	1152.74	20.2904
																9.68903	1.12961	4.22099	2.62396	0.296744	2.36837	0.902592	1675.14	34.9381	1678.11	21.5434	1682.61	20.854			12.7823	1.16581	1.92061	2.12994	0.17813	1.78256	0.836906	1056.75	17.3742	1088.28	14.223	1152.78	23.1408
																9.63832	1.03014	4.00871	3.75198	0.280345	3.6078	0.96157	1593.1	50.9255	1635.96	30.5	1692.29	18.9957			12.7686	1.25069	1.95216	2.87847	0.180862	2.59256	0.900673	1071.68	25.5975	1099.19	19.3295	1154.91	24.8319
																9.54005	0.98679	4.31717	3.05023	0.298839	2.8862	0.946224	1685.55	42.8088	1696.65	25.1519	1711.16	18.1529			12.7625	0.965402	2.07263	3.26974	0.191932	3.12397	0.955419	1131.83	32.4284	1139.8	22.3988	1155.85	19.1548
																9.50836	1.05807	4.35743	4.10316	0.300624	3.96439	0.966181	1694.4	59.0716	1704.3	33.8987	1717.28	19.4493			12.751	0.905543	2.16831	3.21353	0.20061	3.0833	0.959476	1178.6	33.2115	1170.94	22.3345	1157.65	17.9733
																9.46377	1.00027	4.33593	2.41879	0.297738	2.20228	0.910486	1680.08	32.5718	1700.22	19.9598	1725.92	18.3667			12.6771	0.687799	2.17437	2.70019	0.200005	2.61112	0.967014	1175.35	28.0547	1172.88	18.7823	1169.16	13.6378
																9.26999	0.939269	4.63075	2.70342	0.311472	2.53501	0.937703	1747.94	38.8117	1754.83	22.5788	1763.82	17.1651			12.638	0.902266	2.07166	2.35319	0.18997	2.17335	0.923573	1121.21	22.3665	1139.48	16.1164	1175.31	17.8693
																8.95328	1.48004	4.84618	3.33917	0.314825	2.99325	0.896405	1764.41	46.2029	1792.95	28.1129	1827.09	26.8379			12.625	1.00053	2.04127	2.3507	0.18699	2.12715	0.904898	1105.05	21.6017	1129.38	16.0217	1177.36	19.8069
																8.85057	1.02945	5.0082	2.73209	0.321618	2.53071	0.926294	1797.63	39.701	1820.71	23.1279	1847.99	18.6203			12.6135	0.896214	2.14985	2.71235	0.196758	2.56	0.943834	1157.88	27.1323	1165	18.7994	1179.16	17.7398
																8.80369	0.923044	5.15693	2.24591	0.329415	2.04747	0.911641	1835.55	32.7056	1845.54	19.103	1857.59	16.6759			12.6084	0.567152	2.19839	2.65874	0.201119	2.59755	0.976983	1181.33	28.0383	1180.53	18.5579	1179.95	11.2138
																8.72383	0.924188	5.18953	2.75146	0.328491	2.5916	0.941901	1831.06	41.3102	1850.9	23.4283	1874.04	16.6634			12.5921	0.958143	2.15789	2.92325	0.197159	2.76177	0.944759	1160.04	29.3206	1167.59	20.2855	1182.51	18.9465
																8.66424	1.26637	5.42202	3.3982	0.340863	3.15343	0.927969	1890.82	51.678	1888.34	29.1399	1886.39	22.8004			12.4716	1.93828	1.96619	3.0457	0.177924	2.34933	0.77136	1055.62	22.876	1104	20.5023	1201.48	38.2058
																8.64118	1.06194	5.36134	3.4647	0.336151	3.29795	0.95187	1868.12	53.4873	1878.7	29.6582	1891.18	19.1082			12.4622	0.979529	2.23464	2.59016	0.202064	2.3978	0.925735	1186.4	25.9834	1191.98	18.1712	1202.94	19.2839
																8.61973	0.930638	5.39128	2.75475	0.337189	2.59279	0.941207	1873.13	42.1476	1883.47	23.5991	1895.65	16.7364			12.4486	0.741515	2.234	2.53748	0.201786	2.42671	0.956349	1184.91	26.2666	1191.77	17.8	1205.09	14.6126
																8.31526	1.26065	5.99545	2.92452	0.361731	2.63887	0.902323	1990.37	45.1894	1975.18	25.4555	1960.08	22.4999			12.4333	0.762256	2.18844	2.56596	0.197427	2.45013	0.954857	1161.48	26.0416	1177.37	17.8847	1207.55	15.0097
																8.03766	1.03814	6.33729	3.1839	0.369591	3.00989	0.945349	2027.47	52.3611	2023.63	27.9297	2020.46	18.3984			12.4207	0.863299	2.16429	2.49937	0.195051	2.34555	0.938453	1148.68	24.6789	1169.65	17.3597	1209.53	16.9955
																7.99468	1.04488	5.93058	3.15811	0.344022	2.98026	0.943682	1905.99	49.1767	1965.72	27.4468	2029.96	18.4975			12.3975	1.12012	2.1834	2.79685	0.196407	2.56275	0.9163	1155.99	27.121	1175.76	19.4802	1213.2	22.058
																7.98604	1.05487	6.12494	2.80627	0.354912	2.60046	0.926662	1958.01	43.9122	1993.81	24.4999	2031.88	18.6703			12.3702	0.976806	2.34725	2.81661	0.21068	2.6418	0.937938	1232.44	29.6358	1226.72	20.0578	1217.56	19.2129
																7.80639	0.837298	6.645	2.54679	0.376386	2.40522	0.944411	2059.38	42.4005	2065.34	22.4808	2072.05	14.7511			12.3477	1.39116	2.14197	3.03878	0.191906	2.70164	0.889055	1131.69	28.0411	1162.46	21.0379	1221.13	27.3444
																7.7096	0.85491	6.64962	3.25218	0.371977	3.13781	0.964831	2038.7	54.8434	2065.95	28.7129	2094	15.0262			12.3406	0.714371	2.32224	2.8402	0.207937	2.74889	0.967852	1217.82	30.5048	1219.11	20.161	1222.23	14.038
																7.70581	1.1431	6.65067	1.97426	0.371853	1.60967	0.815328	2038.11	28.1269	2066.09	17.4278	2094.87	20.0876			12.3298	0.993101	2.17496	2.73243	0.194579	2.54557	0.931614	1146.13	26.7293	1173.07	19.0083	1223.95	19.52
																7.50981	1.15604	7.04125	3.35633	0.383678	3.15096	0.93881	2093.44	56.3254	2116.65	29.8501	2140.03	20.2126			12.3087	0.891707	2.33552	2.77123	0.208585	2.62384	0.946817	1221.28	29.1921	1223.16	19.705	1227.32	17.5016
																7.41403	1.01765	7.65289	3.04271	0.411687	2.86749	0.942412	2222.63	53.9087	2191.09	27.3313	2162.44	17.7484			12.2469	1.33326	2.3929	3.11164	0.212636	2.81154	0.903553	1242.85	31.7813	1240.48	22.2866	1237.24	26.1475
																5.49197	0.7991	13.1231	2.66585	0.52294	2.54327	0.954017	2711.64	56.2977	2688.54	25.1571	2671.93	13.2307			12.2466	0.881718	2.30665	2.5203	0.204968	2.36104	0.936807	1201.95	25.8901	1214.33	17.8534	1237.28	17.2887
																5.41481	0.868092	13.4503	2.65108	0.52845	2.50492	0.944869	2734.92	55.8311	2711.8	25.0609	2695.33	14.3384			12.2225	0.861861	2.36075	2.56731	0.209362	2.41832	0.941967	1225.42	26.9884	1230.81	18.3134	1241.1	16.9082
																5.41385	0.901507	13.07	2.46665	0.513415	2.29601	0.93082	2671.19	50.2125	2684.72	23.27	2695.62	14.8901			12.1739	1.21145	2.29461	3.3579	0.202687	3.13175	0.932653	1189.74	34.0238	1210.63	23.751	1248.92	23.7216
																5.36413	0.871482	12.4134	3.31682	0.483147	3.20028	0.964865	2540.96	67.2075	2636.2	31.1774	2710.85	14.3768			12.1413	0.977489	2.42814	2.97536	0.213907	2.81021	0.944494	1249.6	31.9227	1250.97	21.4017	1254.16	19.1195
																5.34627	1.00304	12.5902	3.136	0.488393	2.97126	0.947469	2563.72	62.8528	2649.49	29.5076	2716.35	16.5386			12.1219	1.0004	2.30637	2.33851	0.202856	2.11372	0.903876	1190.64	22.9796	1214.25	16.5648	1257.32	19.5429
																5.33964	0.962021	13.4008	2.36083	0.519195	2.15593	0.913208	2695.76	47.4981	2708.31	22.3104	2718.4	15.8592			12.1055	0.868005	2.30587	2.16928	0.202537	1.98805	0.916456	1188.94	21.5851	1214.09	15.3648	1259.94	16.9661
																5.29388	1.09999	14.0518	2.23334	0.539752	1.94367	0.870296	2782.41	43.9229	2753.21	21.1734	2732.58	18.1066			12.0887	0.956213	2.37227	2.77763	0.20808	2.60785	0.938876	1218.58	28.956	1234.28	19.8427	1262.68	18.6735
																5.13292	0.823281	14.0955	3.2803	0.524968	3.17531	0.967993	2720.21	70.4683	2756.15	31.1109	2783.28	13.4877			12.0676	0.907186	2.47003	2.3751	0.216277	2.19502	0.92418	1262.17	25.1616	1263.3	17.1681	1266.05	17.7042
																4.88351	0.675834	14.3515	2.95833	0.508531	2.88009	0.973555	2650.36	62.5896	2773.23	28.0888	2864.6	10.9941			12.0255	1.06268	2.29056	2.46384	0.199862	2.22289	0.902204	1174.58	23.8691	1209.38	17.4163	1272.89	20.7322
																4.55602	1.01392	16.858	3.02511	0.557289	2.85013	0.942159	2855.42	65.752	2926.79	29.0043	2976.94	16.3293			12.0096	0.79869	2.54836	2.573	0.222064	2.4459	0.950602	1292.77	28.6513	1285.97	18.7652	1275.45	15.5695
																															11.9153	0.781324	2.49123	2.08397	0.215381	1.93196	0.927057	1257.42	22.0705	1269.49	15.1004	1290.82	15.2038
																															11.8652	0.859574	2.62089	2.39358	0.225637	2.23391	0.933293	1311.59	26.5116	1306.51	17.5936	1299.01	16.7075
																															11.8341	0.828747	2.54053	2.19907	0.218147	2.03693	0.926269	1272.07	23.5151	1283.72	16.0237	1304.1	16.0967
																															11.818	0.914605	2.51125	2.70964	0.215339	2.55061	0.941312	1257.2	29.1334	1275.29	19.6799	1306.75	17.7578
																															11.8049	0.832541	2.63745	2.67031	0.22591	2.53721	0.950155	1313.03	30.1408	1311.15	19.6623	1308.9	16.1586
																															11.682	1.00634	2.62505	2.5446	0.222507	2.33715	0.918474	1295.11	27.422	1307.68	18.7121	1329.18	19.4783
																															11.6374	0.893922	2.65665	2.38579	0.224326	2.21199	0.927152	1304.69	26.1267	1316.49	17.6017	1336.58	17.283
																															11.5697	1.12235	2.79689	2.69959	0.234792	2.45522	0.909479	1359.57	30.0955	1354.71	20.1945	1347.86	21.6673
																															11.5423	1.0546	2.80405	2.71933	0.234838	2.50651	0.921737	1359.8	30.729	1356.62	20.3559	1352.43	20.3455
																															11.5232	0.890474	2.82282	2.643	0.236018	2.48847	0.941534	1365.96	30.632	1361.62	19.819	1355.62	17.172
																															11.4709	1.0223	2.9823	3.29901	0.24822	3.13662	0.950776	1429.29	40.2096	1403.12	25.091	1364.4	19.6889
																															11.4699	0.882148	2.96029	2.4403	0.246367	2.27528	0.932375	1419.71	28.9929	1397.49	18.5237	1364.56	16.9894
																															11.4256	0.888204	2.84401	2.25455	0.235775	2.07222	0.919127	1364.69	25.4867	1367.23	16.9386	1372.01	17.0887
																															11.3904	0.9762	2.87597	3.08515	0.237691	2.92663	0.94862	1374.68	36.2319	1375.64	23.248	1377.94	18.7665
																															11.3762	0.925627	2.80773	2.36525	0.231762	2.17661	0.920244	1343.73	26.4008	1357.6	17.7109	1380.34	17.7885
																															11.2565	0.84555	3.04875	2.56245	0.249008	2.41892	0.943989	1433.36	31.0879	1419.92	19.5948	1400.64	16.2033
																															11.2002	0.774231	3.00177	2.87073	0.243946	2.76435	0.962945	1407.18	34.9468	1408.07	21.8683	1410.24	14.8172
																															11.1579	1.21257	3.06786	2.93837	0.248373	2.67651	0.910882	1430.08	34.3283	1424.7	22.5049	1417.48	23.1838
																															11.1539	1.19937	3.04019	2.77339	0.246046	2.50064	0.901654	1418.05	31.8313	1417.77	21.1935	1418.16	22.9294
																															11.1505	0.959842	2.80351	2.71552	0.226822	2.54022	0.935448	1317.82	30.2759	1356.47	20.3263	1418.75	18.3484
																															11.1471	0.877575	3.04051	2.75477	0.245922	2.61125	0.947901	1417.41	33.2259	1417.85	21.0517	1419.33	16.7744
																															11.0757	0.996392	3.0594	3.33552	0.245864	3.18322	0.95434	1417.11	40.4963	1422.59	25.5305	1431.61	19.0139
																															11.0614	1.03405	3.07041	2.49426	0.246429	2.26982	0.910017	1420.03	28.9292	1425.34	19.1065	1434.08	19.7259
																															11.056	1.06668	3.1993	2.80995	0.25665	2.59962	0.925148	1472.68	34.2263	1456.99	21.7407	1435	20.3459
																															11.0388	1.09357	2.90221	2.30747	0.232455	2.03187	0.880564	1347.35	24.705	1382.49	17.4272	1437.97	20.8506
																															11.0243	0.939705	3.13565	2.70649	0.250824	2.53812	0.937789	1442.72	32.81	1441.48	20.8392	1440.47	17.9106
																															10.9448	0.980797	3.14266	2.42116	0.24957	2.2136	0.914275	1436.26	28.5005	1443.2	18.6518	1454.26	18.6591
																															10.9326	1.17378	3.2436	2.90856	0.257299	2.6612	0.914954	1476.01	35.1075	1467.65	22.5773	1456.38	22.3243
																															10.9233	0.920381	3.1406	2.59365	0.248918	2.42485	0.93492	1432.89	31.1551	1442.7	19.9777	1457.99	17.5009
																															10.87	1.15335	3.18732	2.31296	0.251388	2.00488	0.866805	1445.63	25.9634	1454.09	17.8785	1467.29	21.9036
																															10.8656	1.0195	3.41826	2.56047	0.269491	2.34874	0.917311	1538.22	32.142	1508.6	20.1168	1468.07	19.3596
																															10.8506	1.16995	3.08629	4.09525	0.242984	3.92458	0.958324	1402.19	49.4574	1429.29	31.4164	1470.69	22.2087
																															10.8266	0.977263	2.97907	2.58556	0.234025	2.39376	0.925818	1355.56	29.2644	1402.29	19.6579	1474.88	18.5404
																															10.7921	0.96212	3.3362	2.90664	0.261244	2.74279	0.943628	1496.2	36.6237	1489.57	22.711	1480.94	18.2383
																															10.7841	0.810001	3.36114	3.096	0.263003	2.98816	0.965169	1505.19	40.1129	1495.39	24.2326	1482.34	15.3517
																															10.6794	0.839899	3.25711	2.59805	0.252388	2.45854	0.946303	1450.78	31.9396	1470.87	20.1861	1500.8	15.8792
																															10.6739	1.46914	2.65939	6.63451	0.205965	6.4698	0.975174	1207.29	71.2338	1317.25	48.9946	1501.78	27.7715
																															10.6684	1.34224	3.15626	3.0278	0.24432	2.71403	0.89637	1409.12	34.3529	1446.53	23.3509	1502.76	25.369
																															10.6355	0.840762	3.51567	2.57814	0.271302	2.43719	0.945331	1547.41	33.5287	1530.74	20.3836	1508.59	15.8774
																															10.6348	1.03178	3.06625	2.42639	0.236604	2.19609	0.905084	1369.02	27.087	1424.3	18.5803	1508.73	19.4849
																															10.5038	0.739529	3.57533	2.4496	0.272489	2.3353	0.95334	1553.43	32.2374	1544.07	19.4389	1532.09	13.922
																															10.4413	0.937261	2.93506	3.58712	0.222361	3.46251	0.965262	1294.34	40.6044	1391	27.1735	1543.32	17.6204
																															10.1646	1.02094	3.85563	2.69509	0.284362	2.49424	0.925473	1613.29	35.5996	1604.45	21.733	1593.64	19.0676
																															10.0714	0.967043	3.68194	3.03741	0.269063	2.87936	0.947964	1536.04	39.3541	1567.46	24.2587	1610.83	18.0191
																															9.96153	0.985065	3.85673	3.01782	0.278762	2.85252	0.945226	1585.12	40.0863	1604.68	24.3378	1631.23	18.3066
																															9.92188	1.10316	3.96249	2.91508	0.285266	2.69829	0.925629	1617.83	38.6072	1626.55	23.6389	1638.64	20.4821
																															9.9073	0.896373	3.84941	2.81379	0.276718	2.6672	0.947901	1574.81	37.2667	1603.15	22.6829	1641.37	16.6381
																															9.9011	1.03692	3.82	3.13483	0.274432	2.95837	0.94371	1563.26	41.0671	1596.97	25.2319	1642.53	19.2441
																															9.81135	1.06045	4.16866	2.44766	0.296765	2.20601	0.901274	1675.25	32.5447	1667.88	20.0473	1659.41	19.6366
																															9.74874	0.966455	4.18117	2.96908	0.295756	2.80738	0.94554	1670.23	41.3082	1670.34	24.3335	1671.26	17.8689
																															9.73944	0.731197	3.92336	2.75721	0.277256	2.65849	0.964195	1577.53	37.2015	1618.51	22.3135	1673.02	13.5156
																															9.73697	1.10733	4.14519	2.6595	0.292857	2.41801	0.909197	1655.79	35.3091	1663.26	21.759	1673.49	20.468
																															9.69757	1.06628	4.16181	2.88523	0.292842	2.68097	0.929205	1655.71	39.1475	1666.54	23.6248	1680.98	19.6904
																															9.6746	0.937003	4.02698	2.75194	0.282683	2.58751	0.940249	1604.86	36.7609	1639.66	22.3878	1685.36	17.2949
																															9.67326	0.899816	4.41778	2.35194	0.310073	2.17301	0.923921	1741.07	33.1552	1715.68	19.4757	1685.62	16.6079
																															9.63762	1.34238	4.13974	3.31587	0.289488	3.032	0.914389	1638.97	43.88	1662.18	27.1245	1692.43	24.754
																															9.62994	0.87517	4.31175	3.0201	0.301276	2.89052	0.957093	1697.63	43.1416	1695.61	24.8974	1693.9	16.1344
																															9.60157	0.979947	4.2264	2.90482	0.294443	2.73454	0.941379	1663.69	40.0983	1679.16	23.856	1699.33	18.0539
																															9.58295	0.727328	4.37613	2.66	0.304282	2.55863	0.961891	1712.51	38.4801	1707.84	21.9887	1702.91	13.3932
																															9.57265	0.999265	4.38838	2.62431	0.304807	2.42662	0.924669	1715.1	36.5428	1710.15	21.7049	1704.89	18.3969
																															9.54475	1.15785	4.54592	2.96404	0.314828	2.72853	0.920547	1764.42	42.1171	1739.41	24.6744	1710.26	21.3026
																															9.54431	0.887105	4.39354	2.50848	0.304261	2.34638	0.935381	1712.4	35.2861	1711.12	20.7511	1710.34	16.3205
																															9.52642	0.969014	4.43202	2.50159	0.306351	2.30629	0.921929	1722.72	34.8655	1718.34	20.7275	1713.79	17.8199
																															9.48733	1.01474	3.95513	4.76841	0.272265	4.65919	0.977095	1552.29	64.2773	1625.04	38.6651	1721.35	18.6432
																															9.39756	1.21616	3.9269	4.14237	0.267765	3.95982	0.955931	1529.45	53.9161	1619.24	33.5361	1738.8	22.2955
																															9.37112	1.00286	4.29266	3.1527	0.291881	2.98895	0.948059	1650.92	43.5337	1691.95	25.9693	1743.96	18.3728
																															9.35249	0.849701	4.5623	3.12448	0.309598	3.00673	0.962312	1738.73	45.8226	1742.41	26.0275	1747.61	15.5594
																															9.31071	0.771975	4.44942	2.56343	0.30059	2.44443	0.953577	1694.23	36.4195	1721.59	21.2553	1755.8	14.1215
																															9.25407	1.09095	4.768	3.00592	0.320153	2.80097	0.931815	1790.47	43.7891	1779.28	25.2353	1766.96	19.9297
																															9.22516	1.00864	4.85085	2.23632	0.324698	1.99593	0.892509	1812.63	31.5377	1793.76	18.8283	1772.67	18.4129
																															9.2033	0.815575	4.75766	3.0231	0.317706	2.91101	0.962922	1778.52	45.2455	1777.46	25.37	1777	14.88
																															9.2032	1.01179	4.80704	2.63093	0.320999	2.42859	0.923093	1794.61	38.0434	1786.13	22.1172	1777.02	18.4604
																															9.16865	0.885455	4.65527	2.50292	0.309698	2.34107	0.935333	1739.22	35.6865	1759.24	20.9233	1783.88	16.1414
																															9.07783	0.916394	4.84598	3.02021	0.319192	2.87782	0.952857	1785.78	44.8883	1792.92	25.4262	1802.01	16.6682
																															9.02055	0.990194	4.94301	2.84117	0.323528	2.66303	0.937303	1806.94	41.9643	1809.63	23.999	1813.51	17.9854
																															8.97935	1.22698	4.88727	3.11501	0.318419	2.86318	0.919156	1782	44.5778	1800.06	26.2626	1821.82	22.2644
																															8.89838	0.839327	4.909	2.36987	0.316951	2.21626	0.935183	1774.82	34.3847	1803.8	19.9935	1838.24	15.2007
																															8.76631	1.43036	4.8979	3.00512	0.311541	2.64288	0.87946	1748.28	40.4701	1801.9	25.3451	1865.27	25.817
																															8.61914	0.852198	5.25104	3.07948	0.328396	2.95922	0.960946	1830.6	47.1599	1860.94	26.2723	1895.77	15.3253
																															8.49748	1.23432	5.17012	3.56955	0.318771	3.34935	0.938311	1783.72	52.1911	1847.71	30.3794	1921.3	22.131
																															8.20778	0.936977	5.97458	2.97091	0.355812	2.81929	0.948964	1962.29	47.6966	1972.15	25.8466	1983.27	16.679
																															7.67171	0.936226	6.89909	2.24175	0.384036	2.03689	0.908616	2095.11	36.4347	2098.54	19.8832	2102.66	16.4373
																															5.98339	1.10337	10.2421	2.69871	0.444655	2.46284	0.9126	2371.45	48.8678	2456.89	24.9698	2529.08	18.5227
																															5.69991	0.940846	11.8697	2.57056	0.490903	2.39219	0.930612	2574.58	50.7773	2594.18	24.0775	2610.23	15.6668
																															5.60167	0.713878	12.5647	2.56006	0.510691	2.45852	0.960334	2659.58	53.5777	2647.58	24.0826	2639.14	11.8534
																															5.53712	1.00428	12.5064	2.50765	0.502464	2.29777	0.916303	2624.38	49.5375	2643.21	23.5813	2658.37	16.6465
																															5.50002	1.08716	12.5021	3.25584	0.498923	3.06897	0.942605	2609.17	65.8537	2642.88	30.62	2669.51	18.0046
																															5.44264	0.788243	13.1751	2.32338	0.520299	2.18559	0.940691	2700.45	48.219	2692.28	21.9304	2686.86	13.0294
																															5.33194	0.750786	12.9198	1.89977	0.499838	1.74513	0.918596	2613.1	37.4917	2673.82	17.9061	2720.78	12.374
																															5.30354	0.801575	13.5162	2.4923	0.520124	2.35988	0.946869	2699.7	52.053	2716.42	23.5673	2729.58	13.197
																															5.2764	0.671283	13.5318	2.28666	0.518062	2.18591	0.955939	2690.96	48.0895	2717.51	21.6239	2738.01	11.0428
																															4.69803	0.954147	16.7993	2.23327	0.572656	2.01918	0.904137	2918.72	47.3981	2923.45	21.4054	2927.4	15.4325
																															4.57155	0.816117	17.4236	2.34924	0.577949	2.20293	0.937719	2940.38	52.0145	2958.45	22.5628	2971.46	13.153
[truncated: 22 more columns]

## Sheet: C. Rabbit Valley, CO
	C. Rabbit Valley, CO
						CO15-RV-1Jes															CO15-RV-1Jebb															CO15-RV-2Jebb
				Isotope ratios						Apparent ages (Ma)									Isotope ratios						Apparent ages (Ma)									Isotope ratios						Apparent ages (Ma)									Isotope ratios
	206Pb*	±	207Pb*	±	206Pb*	±	error	206Pb*	±	207Pb*	±	206Pb*	±			206Pb*	±	207Pb*	±	206Pb*	±	error	206Pb*	±	207Pb*	±	206Pb*	±			206Pb*	±	207Pb*	±	206Pb*	±	error	206Pb*	±	207Pb*	±	206Pb*	±			206Pb*	±	207Pb*	±
	207Pb*	(%)	235U*	(%)	238U	(%)	corr.	238U*	(Ma)	235U	(Ma)	207Pb*	(Ma)			207Pb*	(%)	235U*	(%)	238U	(%)	corr.	238U*	(Ma)	235U	(Ma)	207Pb*	(Ma)			207Pb*	(%)	235U*	(%)	238U	(%)	corr.	238U*	(Ma)	235U	(Ma)	207Pb*	(Ma)			207Pb*	(%)	235U*	(%)
	21.0448	1.11075	0.207865	2.63467	0.0317405	2.38909	0.906787	201.432	4.73798	191.76	4.60387	75.3037	26.4198			20.1124	1.49972	0.227744	3.26369	0.0332352	2.89871	0.888169	210.765	6.01066	208.334	6.14728	181.927	34.9233			19.6797	1.91346	0.240294	4.65887	0.0343123	4.2478	0.911765	217.481	9.08407	218.661	9.16519	232.369	44.2001			20.121	1.34785	0.174168	3.33417
	19.9273	1.30859	0.230023	2.8534	0.0332589	2.53564	0.888638	210.912	5.26144	210.218	5.41819	203.448	30.393			14.7235	1.86039	0.343181	3.50001	0.0366626	2.96463	0.847034	232.113	6.75886	299.579	9.08028	866.088	38.5572			19.3234	1.3434	0.250554	3.83478	0.0351295	3.59176	0.93663	222.572	7.85785	227.026	7.80148	274.391	30.7622			20.0001	1.41621	0.175671	3.59569
	20.1077	1.19745	0.243214	3.25496	0.0354845	3.0267	0.929871	224.783	6.68624	221.049	6.46583	182.473	27.8875			19.8272	1.07821	0.27259	2.73645	0.0392157	2.51508	0.919103	247.97	6.11821	244.762	5.95174	215.133	24.9591			19.0457	1.98981	0.270221	3.49106	0.0373424	2.86847	0.821663	236.339	6.65655	242.87	7.54109	307.463	45.3432			19.8188	1.12716	0.180488	2.7144
	13.5075	2.53535	0.372362	3.68924	0.0364945	2.68001	0.726441	231.068	6.08297	321.402	10.1643	1042.35	51.172			20.2876	2.76789	0.271202	3.56937	0.039922	2.25371	0.631403	252.35	5.57736	243.655	7.73231	161.725	64.7478			15.7052	1.21829	0.336372	3.51272	0.038331	3.29469	0.93793	242.48	7.84056	294.419	8.97795	730.816	25.7985			19.8268	1.27348	0.183221	3.25986
	19.6884	1.06574	0.267995	2.89514	0.0382847	2.69185	0.929781	242.192	6.39849	241.09	6.21319	231.349	24.6056			19.6934	1.39464	0.284485	2.99226	0.0406507	2.64738	0.884741	256.865	6.66649	254.209	6.72924	230.76	32.2004			19.6618	1.74145	0.285498	3.44475	0.04073	2.97215	0.862805	257.356	7.49834	255.009	7.76833	234.512	40.1684			19.5478	1.98345	0.237663	3.11199
	14.23	3.79724	0.37225	4.54477	0.0384351	2.49717	0.549461	243.126	5.9582	321.319	12.5189	936.388	77.8995			19.0959	1.30222	0.30992	2.54664	0.0429414	2.18851	0.859373	271.04	5.80877	274.119	6.11797	301.491	29.692			19.2819	1.4201	0.322384	3.88992	0.0451036	3.62144	0.930979	284.39	10.0751	283.735	9.62941	279.355	32.4921			19.8212	1.33408	0.244767	3.71222
	19.9208	1.31676	0.267032	2.57312	0.0385974	2.21068	0.859143	244.133	5.29609	240.318	5.50643	204.183	30.5781			381.271	107.712	0.0167593	107.768	0.0463637	3.48519	0.0323398	292.158	9.95499	16.8761	18.0387	NA	NA			18.9377	2.51096	0.357768	4.06494	0.0491606	3.19669	0.786406	309.366	9.65594	310.547	10.8762	320.432	57.0652			17.8977	1.84804	0.286977	3.18621
	19.3066	1.24474	0.276716	3.08662	0.0387639	2.8245	0.915081	245.166	6.79471	248.049	6.79296	276.429	28.4991			19.1306	1.28815	0.344872	2.83268	0.0478713	2.52284	0.890621	301.439	7.42977	300.857	7.37584	297.337	29.4132			18.9063	2.13181	0.364406	4.1398	0.0499895	3.54871	0.857217	314.457	10.8914	315.499	11.2271	324.182	48.4141			19.2027	1.12544	0.27974	3.06427
	19.4664	1.18642	0.286272	2.83643	0.0404346	2.57639	0.908319	255.526	6.45457	255.621	6.40994	257.488	27.2753			19.2511	0.770985	0.349221	1.88352	0.0487803	1.7185	0.912386	307.029	5.1526	304.135	4.95018	283.01	17.65			19.0916	1.85451	0.377227	4.18231	0.0522557	3.74867	0.896315	328.356	12.0007	324.996	11.6322	301.982	42.3048			19.2903	1.11384	0.295947	2.63427
	19.4691	1.17514	0.286967	3.09123	0.0405382	2.85915	0.924924	256.168	7.18062	256.169	6.99894	257.155	27.0237			19.6526	1.25218	0.347123	2.91598	0.0494983	2.63343	0.903105	311.441	8.00663	302.555	7.62954	235.597	28.898			19.1394	1.63771	0.389294	3.69658	0.0540622	3.31401	0.896505	339.413	10.9572	333.854	10.5179	296.289	37.3688			19.1909	1.27107	0.309766	2.95146
	18.4187	1.83906	0.318134	3.10561	0.0425165	2.50253	0.80581	268.413	6.5792	280.466	7.6109	383.185	41.3262			19.4183	1.05094	0.35564	2.63148	0.0501082	2.41251	0.916789	315.186	7.42101	308.954	7.00976	263.187	24.1494			18.5432	1.1281	0.420786	3.02107	0.0566152	2.80255	0.927666	355.008	9.68027	356.613	9.08521	368.029	25.3981			18.7095	0.987186	0.328311	2.45798
	18.2629	1.24109	0.341376	3.25687	0.0452368	3.01113	0.924547	285.211	8.40089	298.214	8.41634	402.239	27.7977			18.7364	3.32939	0.4413	4.07295	0.0599939	2.34607	0.576013	375.588	8.55979	371.169	12.6631	344.672	75.3482			18.5576	1.25177	0.42814	3.84534	0.0576494	3.63589	0.945532	361.314	12.7756	361.855	11.7057	366.281	28.2146			18.8695	0.762314	0.329321	2.44872
	19.4053	1.02491	0.333881	2.98775	0.047011	2.80646	0.939322	296.144	8.12315	292.524	7.59375	264.696	23.5243			18.9223	1.33905	0.43757	3.19896	0.060077	2.90522	0.908176	376.094	10.6137	368.538	9.88714	322.291	30.4405			18.4507	1.27697	0.442075	4.1804	0.0591828	3.98059	0.952203	370.654	14.3381	371.714	13.0131	379.287	28.7042			19.2014	1.05642	0.328127	2.96782
	19.038	1.18424	0.341411	2.53186	0.0471613	2.23783	0.883868	297.07	6.49707	298.24	6.5432	308.421	26.9491			18.2985	0.933255	0.469087	3.0211	0.0622812	2.87334	0.95109	389.483	10.8598	390.558	9.79523	397.883	20.9184			17.8668	1.19003	0.462026	3.51106	0.0598965	3.30324	0.940809	374.996	12.0336	385.666	11.2667	451.146	26.4282			18.9552	1.08394	0.332762	2.76842
	18.9242	1.41864	0.352541	2.93227	0.0484077	2.56625	0.875177	304.738	7.63839	306.63	7.7607	322.059	32.2188			18.2925	1.05423	0.481241	2.41306	0.063874	2.17059	0.899517	399.143	8.40099	398.924	7.96057	398.612	23.6275			18.0362	1.48887	0.458173	3.53018	0.0599601	3.20084	0.906709	375.383	11.6723	382.987	11.2633	430.151	33.2072			18.4602	1.37832	0.3703	2.93251
	15.3558	1.30784	0.444317	3.21123	0.0495054	2.93284	0.913307	311.485	8.91815	373.292	10.031	778.259	27.4995			18.0367	0.97316	0.491035	2.83093	0.0642624	2.65841	0.939058	401.495	10.3478	405.616	9.46666	430.095	21.691			17.7886	1.43658	0.464737	4.19987	0.0599842	3.94654	0.93968	375.529	14.397	387.547	13.5313	460.88	31.867			17.1929	1.2843	0.450859	3.32319
	19.2332	1.7891	0.356763	3.45802	0.0497872	2.95922	0.855757	313.215	9.04716	309.795	9.23304	285.14	40.913			18.0758	0.978026	0.50493	2.55695	0.0662243	2.36251	0.923957	413.368	9.45935	415.034	8.71121	425.261	21.8182			18.1205	1.29284	0.457114	3.45923	0.060101	3.20856	0.927535	376.24	11.7264	382.249	11.0194	419.755	28.869			18.4852	0.950659	0.441732	2.07345
	18.6617	1.18477	0.367707	2.62564	0.04979	2.34314	0.892407	313.232	7.16401	317.953	7.16773	353.655	26.7548			17.6134	0.974418	0.522694	2.69594	0.0668001	2.51369	0.932396	416.849	10.1467	426.95	9.39698	482.831	21.5428			18.3017	1.10069	0.464859	3.55783	0.0617306	3.38329	0.950942	386.141	12.6807	387.632	11.4646	397.49	24.6731			18.3664	1.00484	0.448329	2.25446
	14.4952	1.5399	0.479506	2.72146	0.0504322	2.24389	0.824519	317.174	6.94481	397.734	8.95614	898.366	31.7592			18.0818	0.822206	0.514139	2.92688	0.0674544	2.80902	0.959732	420.801	11.4429	421.229	10.0917	424.521	18.3434			18.3612	1.15455	0.466873	3.01252	0.0621994	2.7825	0.923644	388.988	10.5035	389.027	9.73597	390.213	25.9147			18.4277	1.5229	0.447148	3.26723
	18.7456	0.987945	0.401682	3.31835	0.0546349	3.16787	0.954653	342.915	10.5792	342.868	9.65601	343.532	22.3358			18.0766	1.08339	0.519596	3.08397	0.0681509	2.88741	0.936264	425.006	11.8759	424.882	10.7076	425.16	24.1685			18.5619	1.63377	0.472384	4.5056	0.0636219	4.19896	0.931942	397.615	16.1912	392.835	14.6787	365.751	36.82			18.0484	1.20116	0.458042	3.48416
	16.9911	1.02383	0.450115	3.21411	0.0554923	3.04669	0.947909	348.154	10.3258	377.36	10.1304	561.713	22.3108			17.5341	1.16223	0.564405	2.63715	0.0718064	2.36723	0.897648	447.029	10.2236	454.39	9.66094	492.772	25.6257			17.6046	1.13244	0.501801	3.13754	0.064098	2.92604	0.932591	400.499	11.3622	412.92	10.6452	483.931	24.9944			18.4251	1.19309	0.450889	3.39337
	18.4763	1.15493	0.425472	3.22423	0.0570394	3.01028	0.933644	357.595	10.4715	359.956	9.77195	376.16	25.9787			17.6675	0.852326	0.561405	2.7412	0.0719679	2.60533	0.950432	448.001	11.2755	452.44	10.008	476.04	18.8475			17.728	1.36208	0.49958	3.55029	0.0642617	3.27861	0.923477	401.491	12.7618	411.418	12.0102	468.484	30.1593			18.4546	1.63211	0.457696	3.35571
	5.36858	2.54357	1.46812	3.98119	0.0571886	3.0627	0.769291	358.505	10.6802	917.356	24.0503	2709.48	41.9665			17.5146	0.889628	0.574423	2.80439	0.0729993	2.65954	0.94835	454.2	11.6639	460.871	10.3895	495.241	19.6075			18.2663	1.17685	0.487075	3.23351	0.0645558	3.01174	0.931416	403.272	11.7734	402.915	10.7543	401.822	26.3607			18.4572	1.09539	0.461303	3.00184
	18.5695	0.811066	0.424678	1.99294	0.0572198	1.82044	0.913442	358.695	6.35148	359.39	6.03215	364.839	18.266			17.0254	1.23029	0.644236	2.56196	0.0795847	2.24723	0.877151	493.643	10.6792	504.925	10.1929	557.332	26.8094			18.1087	1.29153	0.492474	3.20834	0.0647082	2.93691	0.915396	404.195	11.5063	406.595	10.7499	421.198	28.8319			17.9017	1.32628	0.492962	3.13331
	18.6734	1.81022	0.430184	3.13273	0.0582862	2.55677	0.816149	365.195	9.07764	363.307	9.56814	352.254	40.8837			17.377	1.3492	0.638401	2.98903	0.0804926	2.6672	0.89233	499.062	12.8088	501.316	11.8264	512.579	29.6324			17.9483	1.62288	0.506677	3.66447	0.0659846	3.28552	0.896586	411.919	13.1103	416.212	12.5134	441.029	36.1054			18.1827	1.44972	0.496912	3.87567
	17.0478	1.54141	0.494586	2.9597	0.0611783	2.52663	0.853679	382.787	9.39009	408.031	9.94517	554.464	33.6458			17.4002	0.985862	0.637929	2.99743	0.0805406	2.83067	0.944364	499.348	13.6013	501.023	11.8543	509.62	21.696			18.0785	1.28524	0.503071	3.90597	0.0659902	3.68847	0.944315	411.953	14.7194	413.779	13.275	424.931	28.6937			18.0438	1.10753	0.508196	3.52653
	19.7199	2.07861	0.431331	3.52769	0.061717	2.85026	0.807968	386.059	10.6807	364.121	10.7946	227.659	48.0318			17.3134	0.963443	0.643974	2.65065	0.0808981	2.46936	0.931604	501.481	11.914	504.764	10.5432	520.6	21.1199			18.1694	1.58882	0.504332	3.52472	0.0664881	3.14631	0.892642	414.963	12.6447	414.63	11.9991	413.733	35.5161			18.0811	1.04294	0.508462	3.28362
	18.6203	1.1792	0.458473	2.79863	0.0619424	2.53807	0.906898	387.427	9.54353	383.196	8.9331	358.675	26.6011			17.3909	1.1972	0.642944	3.06131	0.0811301	2.8175	0.920359	502.865	13.6297	504.127	12.1649	510.798	26.3088			17.7004	1.48173	0.519273	3.9167	0.0666907	3.62561	0.925679	416.187	14.6126	424.665	13.5936	471.894	32.7889			17.986	1.27831	0.515082	2.92829
	18.3732	1.03956	0.478139	2.47766	0.0637422	2.24902	0.907721	398.344	8.68766	396.795	8.13803	388.741	23.3389			16.5379	1.23916	0.677598	3.11472	0.0813094	2.85762	0.917455	503.934	13.852	525.322	12.7749	620.311	26.7392			17.7832	1.36327	0.517333	4.21168	0.0667525	3.98494	0.946164	416.561	16.0748	423.368	14.5816	461.554	30.2425			18.1269	1.04593	0.511943	2.98403
	18.2451	1.0952	0.49341	2.90683	0.0653192	2.69262	0.926308	407.894	10.6428	407.231	9.75195	404.432	24.5205			17.0717	1.34024	0.657879	3.18172	0.0814909	2.88568	0.906954	505.016	14.0169	513.316	12.8206	551.381	29.2575			18.2811	1.30864	0.50716	3.87823	0.0672723	3.65078	0.94135	419.701	14.8342	416.538	13.2518	400.009	29.3225			17.9612	1.01166	0.517407	2.82066
	18.1817	0.864228	0.500478	2.4424	0.0660248	2.28439	0.935305	412.162	9.12071	412.026	8.27204	412.22	19.3224			17.5027	0.947905	0.646952	2.84322	0.0821606	2.68055	0.942788	509.006	13.1194	506.601	11.3409	496.721	20.8858			17.972	1.6043	0.517822	4.12828	0.0675249	3.80381	0.921401	421.227	15.5104	423.695	14.3017	438.097	35.7103			18.0553	1.1913	0.515631	3.02827
	18.1427	1.07533	0.502537	2.53188	0.0661544	2.29218	0.905327	412.945	9.16865	413.419	8.59857	417.013	24.0225			17.2173	1.21414	0.65793	2.66601	0.0821925	2.37349	0.890279	509.196	11.6207	513.347	10.7429	532.844	26.5999			18.0976	1.24626	0.516191	4.03612	0.0677828	3.83889	0.951134	422.784	15.7095	422.604	13.9533	422.571	27.8151			17.6315	1.17545	0.528202	3.15203
	17.9527	1.41817	0.509858	3.47036	0.066415	3.16736	0.91269	414.521	12.7162	418.353	11.8997	440.485	31.5665			17.0588	2.12903	0.665116	3.39058	0.0823256	2.6388	0.778273	509.989	12.939	517.739	13.7526	553.034	46.4546			18.2193	1.24379	0.514284	3.36865	0.0679866	3.13062	0.92934	424.014	12.8472	421.326	11.6172	407.594	27.8325			17.9609	1.068	0.518994	3.03359
	17.3698	1.11238	0.529022	2.8142	0.066674	2.58503	0.918564	416.086	10.4162	431.16	9.88688	513.459	24.4368			17.0699	1.03981	0.665119	2.65721	0.0823791	2.44531	0.920257	510.308	11.9975	517.74	10.7777	551.616	22.6976			17.8684	1.31068	0.525028	3.97198	0.0680699	3.74949	0.943987	424.517	15.4045	428.505	13.8857	450.952	29.1092			18.0195	1.12726	0.520755	3.3543
	18.2138	1.25048	0.517349	2.5166	0.0683712	2.18394	0.867813	426.335	9.00969	423.379	8.71271	408.265	27.979			17.1444	1.18465	0.662289	4.17018	0.0823868	3.99837	0.958801	510.353	19.619	516.013	16.8719	542.126	25.9223			17.9273	1.27257	0.525653	3.5718	0.0683758	3.33741	0.934379	426.363	13.7692	428.921	12.4963	443.632	28.3093			17.9499	1.70649	0.527887	3.20775
	18.0703	1.07127	0.529989	2.76896	0.0694896	2.55334	0.922128	433.08	10.6947	431.802	9.73954	425.942	23.895			16.8912	1.28057	0.672445	3.09118	0.0824148	2.81346	0.910156	510.52	13.8093	522.198	12.6206	574.529	27.8458			17.9852	1.53117	0.525855	3.68165	0.0686228	3.34815	0.909414	427.853	13.8601	429.055	12.8839	436.463	34.1127			17.9134	1.14263	0.530612	3.23696
	17.7992	1.01854	0.539234	2.67735	0.069641	2.47604	0.92481	433.993	10.3921	437.92	9.52402	459.575	22.6077			16.8191	1.01943	0.675763	2.54277	0.0824678	2.32947	0.916115	510.836	11.4405	524.21	10.412	583.821	22.1115			17.3071	1.31815	0.552827	3.61857	0.0694226	3.36994	0.931291	432.676	14.1024	446.847	13.0815	521.4	28.9296			17.8534	0.966545	0.549034	2.92891
	18.055	1.09097	0.543999	3.0103	0.0712662	2.80565	0.932017	443.78	12.032	441.058	10.7698	427.829	24.3268			17.3383	1.58907	0.65599	3.14535	0.0825263	2.71442	0.862994	511.185	13.3398	512.158	12.6521	517.44	34.8699			17.8326	1.75431	0.538645	3.93249	0.0696956	3.5195	0.89498	434.322	14.7824	437.531	13.9794	455.398	38.9343			18.0056	1.10943	0.548485	3.14125
	17.5851	1.03265	0.569735	3.20837	0.0726954	3.03765	0.946787	452.374	13.2705	457.843	11.8245	486.328	22.7837			17.0463	1.73433	0.667256	2.85154	0.0825297	2.26349	0.793779	511.205	11.1242	519.043	11.5883	554.621	37.84			17.4324	1.50931	0.563427	4.39588	0.0712662	4.12864	0.939209	443.779	17.7057	453.755	16.0869	505.563	33.1848			17.4825	1.3227	0.57834	3.30757
	17.9173	1.31703	0.562562	3.12605	0.073136	2.83507	0.906918	455.021	12.4555	453.192	11.4282	444.873	29.3017			17.3958	1.98505	0.653957	3.17822	0.0825433	2.48206	0.780961	511.286	12.2002	510.911	12.7603	510.183	43.661			17.4063	1.27618	0.565864	3.43197	0.0714673	3.18587	0.928292	444.989	13.6986	455.336	12.5937	508.867	28.0663			17.3772	0.977556	0.593649	3.00963
	17.3995	3.93429	0.601773	5.30421	0.0759728	3.55754	0.670701	472.04	16.1929	478.358	20.2367	509.7	86.5229			17.0548	0.845386	0.667243	2.61472	0.0825695	2.47428	0.94629	511.442	12.1655	519.035	10.6257	553.525	18.4269			17.4736	1.37023	0.563743	3.7483	0.0714747	3.48887	0.930788	445.034	15.0029	453.96	13.7217	500.394	30.1943			17.6549	1.04958	0.610671	2.83243
	17.5652	1.87295	0.6267	3.17307	0.0798731	2.56133	0.807209	495.365	12.2127	494.038	12.4132	488.843	41.3479			17.3436	1.5652	0.656186	3.54379	0.0825762	3.17941	0.897176	511.482	15.6337	512.279	14.2575	516.771	34.3621			17.527	1.24978	0.57098	3.90674	0.0726132	3.70144	0.94745	451.88	16.1533	458.648	14.4186	493.664	27.5403			17.5384	1.1586	0.637652	2.84304
	17.2505	1.90809	0.638171	3.40526	0.0798777	2.82046	0.828266	495.393	13.449	501.173	13.4705	528.629	41.8126			17.2709	1.03891	0.659074	3.20445	0.0825917	3.03137	0.945986	511.574	14.9083	514.048	12.9264	526.037	22.7787			17.0676	1.95308	0.631024	4.28594	0.0781459	3.81506	0.890136	485.046	17.8258	496.734	16.8384	551.895	42.6218			16.9796	1.33611	0.658811	3.69121
	17.0215	1.54055	0.651859	2.92411	0.0805082	2.48539	0.849963	499.156	11.9378	509.622	11.7172	557.819	33.6148			16.9823	0.990564	0.670341	2.69467	0.0826001	2.506	0.929983	511.624	12.3257	520.92	10.981	562.816	21.5809			16.86	1.68524	0.648071	3.40678	0.0792807	2.96076	0.86908	491.828	14.0202	507.291	13.6034	578.545	36.6038			16.6213	1.39178	0.681065	3.31177
	17.053	1.13704	0.651184	3.06045	0.0805737	2.84139	0.928422	499.546	13.6581	509.207	12.2559	553.767	24.811			17.2382	1.42062	0.661412	3.07601	0.0827277	2.72831	0.886965	512.384	13.4383	515.477	12.4347	530.189	31.1357			17.2081	1.77666	0.637485	3.65256	0.0795957	3.19134	0.873728	493.709	15.1677	500.748	14.4394	533.998	38.8795			16.6164	1.27214	0.683181	3.66312
	17.5892	1.11784	0.631398	2.67834	0.0805816	2.43391	0.90874	499.593	11.7004	496.966	10.5258	485.823	24.6884			16.8594	1.67971	0.676773	3.16062	0.0827889	2.67733	0.847089	512.748	13.1962	524.822	12.9537	578.67	36.4948			16.8905	1.88907	0.650745	4.9193	0.0797519	4.54213	0.923329	494.641	21.627	508.937	19.6933	574.661	41.0725			16.8267	1.21205	0.678494	2.44656
	17.201	1.47027	0.645714	2.85576	0.0805903	2.4482	0.857285	499.645	11.7703	505.838	11.3777	534.884	32.2077			17.5683	1.13479	0.649607	2.62414	0.0828072	2.36608	0.901661	512.857	11.6645	508.237	10.4931	488.459	25.0375			16.5856	1.2385	0.669156	3.22277	0.0805277	2.9753	0.92321	499.272	14.2942	520.199	13.1194	614.099	26.7593			17.2194	0.994504	0.664368	2.88673
	16.9184	1.60991	0.658932	3.60625	0.0808885	3.22696	0.894823	501.424	15.5675	513.96	14.5455	571.072	35.0078			16.9422	1.04509	0.674169	2.46649	0.0828753	2.23413	0.905794	513.263	11.0223	523.244	10.0854	568.014	22.7527			17.043	1.84015	0.651894	3.90633	0.0806143	3.44576	0.882097	499.788	16.5709	509.644	15.6541	555.036	40.1495			17.1819	1.02153	0.669496	2.81496
	16.8448	1.28759	0.662744	2.73053	0.0810028	2.40789	0.881838	502.105	11.6313	516.291	11.0513	580.503	27.9608			17.1919	1.00266	0.664556	2.87899	0.0828977	2.69875	0.937395	513.396	13.3179	517.397	11.6714	536.038	21.9466			17.1349	1.55795	0.649223	4.18927	0.0807165	3.8888	0.928277	500.398	18.7235	508	16.7464	543.343	34.0634			17.3896	1.17144	0.662542	3.07427
	17.3365	1.11753	0.646161	2.06595	0.0812814	1.73761	0.84107	503.767	8.42022	506.113	8.23433	517.668	24.5442			17.3629	0.919193	0.658326	3.09409	0.0829374	2.9544	0.954853	513.632	14.586	513.59	12.4726	514.337	20.1848			17.3142	1.89122	0.643592	4.35517	0.080854	3.92311	0.900794	501.218	18.9184	504.528	17.3179	520.497	41.5042			16.6312	1.31894	0.699525	3.41495
	17.08	1.36971	0.657885	2.72167	0.0815314	2.35189	0.864135	505.257	11.4293	513.319	10.9667	550.32	29.9264			17.2145	1.36982	0.665085	2.79767	0.083073	2.43937	0.87193	514.439	12.0614	517.719	11.3471	533.153	29.9754			17.3125	1.99603	0.643864	3.83348	0.0808803	3.27283	0.853749	501.375	15.7873	504.696	15.247	520.711	43.8032			17.4418	1.04392	0.66778	2.8241
	17.4213	1.25615	0.646644	2.49535	0.0817397	2.15612	0.864056	506.499	10.5027	506.411	9.95039	506.952	27.6406			17.4238	1.13382	0.658108	2.50448	0.0832009	2.23313	0.891654	515.201	11.0574	513.456	10.0936	506.652	24.9405			17.4625	1.43238	0.639324	4.17617	0.0810055	3.92284	0.939339	502.122	18.9499	501.888	16.5387	501.778	31.5165			17.0461	1.6634	0.684166	3.33088
	17.0486	1.45886	0.660909	3.74288	0.0817557	3.44686	0.920913	506.594	16.7931	515.17	15.1239	554.335	31.8521			16.7734	0.85745	0.683797	2.94699	0.0832215	2.81949	0.956736	515.323	13.9639	529.067	12.1525	589.769	18.5891			17.4867	1.76666	0.63885	3.74222	0.0810576	3.29896	0.881551	502.432	15.9456	501.594	14.8132	498.707	38.9136			17.0016	1.47283	0.686643	3.3032
	17.2824	1.26713	0.652113	2.83861	0.0817739	2.5401	0.894838	506.702	12.3779	509.778	11.3773	524.533	27.7798			17.272	1.45914	0.664239	2.97883	0.0832446	2.59699	0.871814	515.46	12.8652	517.203	12.0727	525.846	32.0129			17.0319	1.38304	0.657427	3.38743	0.0812454	3.09223	0.912854	503.552	14.9784	513.039	13.6439	556.496	30.1566			16.936	1.3208	0.690059	2.96588
	16.833	1.62893	0.66973	2.87354	0.0817994	2.36724	0.823806	506.854	11.5389	520.548	11.7036	582.042	35.3759			17.3582	0.93574	0.663355	2.76159	0.0835487	2.59823	0.940844	517.27	12.9148	516.664	11.1833	514.922	20.5545			16.4725	2.11505	0.680028	3.99201	0.0812784	3.38566	0.84811	503.749	16.4059	526.791	16.4085	628.851	45.5892			16.9521	1.5932	0.689604	3.48155
	17.4119	1.51981	0.647895	2.85736	0.0818537	2.41964	0.84681	507.178	11.8015	507.182	11.4074	508.18	33.4214			17.0765	1.2206	0.675561	3.01113	0.0837049	2.75264	0.914156	518.199	13.7059	524.088	12.3278	550.781	26.66			16.7446	2.20915	0.669194	4.48317	0.0813045	3.90109	0.870163	503.904	18.9091	520.222	18.2519	593.494	47.9091			17.4121	1.02306	0.671496	3.03704
	17.3861	1.63596	0.649137	2.86189	0.0818894	2.34821	0.820509	507.391	11.4578	507.948	11.4388	511.434	35.9582			17.2676	1.0749	0.668111	2.3609	0.0837084	2.10201	0.890341	518.22	10.4667	519.564	9.60161	526.451	23.5532			17.5588	1.37362	0.638809	3.43677	0.0813867	3.15033	0.916653	504.395	15.2844	501.569	13.6035	489.677	30.3009			17.2022	1.24187	0.679714	3.15785
	17.0063	0.828093	0.665707	2.35239	0.0821447	2.20181	0.935992	508.912	10.7744	518.099	9.54631	559.783	18.0561			16.6284	1.00016	0.694155	2.82645	0.0837521	2.64358	0.9353	518.48	13.1697	535.294	11.7596	608.52	21.6409			17.2534	1.37615	0.650881	3.42007	0.0814823	3.13098	0.915474	504.964	15.207	509.021	13.6923	528.26	30.161			17.1841	1.05891	0.683011	2.50332
	17.4068	1.38214	0.651299	2.95791	0.0822597	2.61514	0.884116	509.597	12.8135	509.278	11.8465	508.797	30.3919			17.3306	0.969375	0.666559	3.30668	0.0838185	3.16139	0.956064	518.875	15.7609	518.618	13.4297	518.421	21.2945			16.7906	1.73297	0.668895	4.0108	0.0814912	3.61709	0.901837	505.018	17.5698	520.04	16.324	587.535	37.5928			17.0718	1.43032	0.691846	3.27438
	16.8407	1.09703	0.673601	2.95526	0.0823094	2.7441	0.928548	509.893	13.4529	522.9	12.0781	581.051	23.8106			17.0585	1.25579	0.679608	2.5724	0.0841178	2.24504	0.872744	520.655	11.2294	526.538	10.569	553.062	27.4248			16.9878	1.40134	0.661972	3.51476	0.0815951	3.22332	0.917081	505.637	15.6755	515.82	14.2158	562.117	30.5152			17.1006	1.10958	0.691903	2.86359
	16.8597	1.05202	0.673217	2.87716	0.0823555	2.67792	0.930754	510.167	13.1353	522.667	11.7548	578.587	22.839			16.9194	1.00451	0.685355	2.21709	0.0841372	1.97648	0.891472	520.77	9.88812	530.006	9.15482	570.922	21.8346			17.0117	1.28284	0.661609	3.68389	0.0816651	3.45331	0.937409	506.054	16.8073	515.598	14.895	559.093	27.9564			16.4541	1.44442	0.721263	3.25929
	17.2979	0.602606	0.656328	2.47967	0.0823761	2.40534	0.970022	510.29	11.801	512.365	9.97729	522.568	13.2096			17.206	1.0517	0.673978	2.61566	0.0841423	2.39492	0.915605	520.8	11.9822	523.128	10.6936	534.262	23.014			17.1994	1.3263	0.654411	3.70949	0.0816677	3.46428	0.933897	506.069	16.8612	511.189	14.8999	535.095	29.0343			16.8399	1.12324	0.705338	3.25349
	17.165	1.24939	0.662823	2.72599	0.0825525	2.42282	0.888785	511.34	11.9103	516.339	11.0337	539.456	27.3494			17.2904	1.0307	0.670757	2.73619	0.0841507	2.53464	0.926339	520.85	12.6825	521.173	11.1544	523.518	22.5853			17.256	1.50372	0.652528	3.29997	0.0817009	2.93746	0.890145	506.267	14.3024	510.033	13.2317	527.925	32.9412			17.3718	1.09833	0.684932	2.82519
	17.3288	1.02157	0.658948	3.06202	0.082853	2.88658	0.942705	513.13	14.2377	513.97	12.3503	518.646	22.4415			17.4472	0.916836	0.66506	2.67842	0.0841927	2.51662	0.939589	521.1	12.5981	517.704	10.8632	503.706	20.1558			17.4759	1.5268	0.644668	3.89277	0.0817456	3.58086	0.919874	506.534	17.444	505.192	15.4946	500.102	33.6347			17.2313	1.38951	0.692009	2.8871
	17.1258	1.35012	0.666957	3.00079	0.0828778	2.67991	0.893069	513.277	13.222	518.861	12.1916	544.471	29.5082			17.0656	1.67668	0.680878	3.34353	0.0843097	2.89274	0.865175	521.796	14.4995	527.305	13.7529	552.197	36.5986			16.9936	1.26333	0.66398	4.01019	0.0818707	3.80599	0.949082	507.279	18.567	517.046	16.2494	561.37	27.5265			16.805	1.44083	0.71227	2.70289
	17.3525	1.03223	0.658708	3.33317	0.082936	3.16931	0.950839	513.624	15.6468	513.823	13.4411	515.646	22.6517			17.1669	1.01884	0.677812	3.11527	0.0844285	2.94396	0.945008	522.502	14.7754	525.451	12.7795	539.217	22.2964			16.8468	1.34242	0.670011	3.48547	0.0819009	3.21659	0.922856	507.459	15.697	520.719	14.1998	580.282	29.1524			17.1016	1.07517	0.700533	2.43709
	17.1102	1.29963	0.669392	2.96174	0.0831044	2.66136	0.898582	514.626	13.1637	520.343	12.0592	546.449	28.4035			17.1794	2.06154	0.68039	3.78274	0.0848114	3.17163	0.838446	524.778	15.9846	527.01	15.5532	537.663	45.1039			16.7294	1.43529	0.674729	3.63134	0.0819027	3.33566	0.918574	507.47	16.2784	523.584	14.8564	595.421	31.1001			17.1392	0.959512	0.700499	2.84921
	17.3981	1.01495	0.658647	2.83848	0.0831463	2.65082	0.933887	514.875	13.1176	513.786	11.4455	509.899	22.32			16.931	1.04109	0.691097	2.71484	0.0849005	2.50728	0.923549	525.307	12.6486	533.459	11.2658	569.444	22.6679			17.1052	1.46147	0.660342	3.32152	0.0819567	2.98272	0.897998	507.792	14.5648	514.823	13.4142	547.092	31.9369			16.8367	1.27172	0.714003	3.00532
	17.3856	0.872106	0.659227	2.79107	0.0831595	2.65132	0.94993	514.954	13.122	514.141	11.2602	511.507	19.1881			17.2381	1.16809	0.678997	2.82188	0.084927	2.56877	0.910303	525.465	12.9625	526.168	11.5879	530.195	25.5957			16.9097	1.28062	0.668245	3.75994	0.0819899	3.53513	0.94021	507.989	17.2688	519.645	15.2939	572.164	27.8396			17.2361	1.39324	0.699038	3.08176
	17.3945	1.80672	0.659491	3.05982	0.0832357	2.46946	0.807063	515.407	12.2323	514.303	12.3476	510.359	39.7062			16.8333	1.13869	0.696586	3.48637	0.0850811	3.29517	0.945158	526.38	16.6559	536.75	14.5356	581.996	24.7198			17.1362	1.4383	0.659422	3.57981	0.0819911	3.27816	0.915736	507.997	16.0137	514.261	14.4453	543.168	31.4395			17.0323	1.03551	0.70811	2.72312
	17.4232	1.23207	0.658734	3.41037	0.0832771	3.18003	0.93246	515.654	15.7593	513.839	13.7528	506.724	27.12			17.4077	1.48089	0.674428	3.51124	0.0851853	3.18367	0.906709	526.999	16.1105	523.401	14.3611	508.702	32.5771			17.4526	2.20925	0.647642	4.09116	0.0820131	3.44337	0.841661	508.127	16.825	507.026	16.33	503.025	48.6238			17.2619	1.01314	0.701206	2.67446
	17.3116	1.11835	0.663126	2.7515	0.0832954	2.51396	0.913672	515.762	12.461	516.525	11.1401	520.832	24.5329			17.2274	1.23042	0.682522	3.12312	0.0853151	2.87053	0.919123	527.77	14.5462	528.298	12.8646	531.554	26.9559			17.299	1.08501	0.653469	3.44384	0.0820229	3.26846	0.949072	508.186	15.972	510.611	13.8207	522.421	23.8022			16.7421	0.96918	0.725787	3.00422
	17.4264	0.956403	0.659279	2.78738	0.0833611	2.61817	0.939292	516.154	12.9869	514.173	11.2459	506.325	21.0513			17.0079	1.05873	0.692612	2.48203	0.0854727	2.24489	0.90446	528.706	11.3952	534.368	10.313	559.562	23.0616			17.2094	1.2533	0.65853	3.80897	0.0822296	3.59687	0.944316	509.417	17.6179	513.714	15.3576	533.815	27.441			17.0505	1.26912	0.723169	2.54045
	17.3319	1.22043	0.663136	2.88771	0.0833944	2.61714	0.906303	516.352	12.9866	516.53	11.6917	518.256	26.8103			17.2644	1.26575	0.682566	2.90496	0.0855035	2.6147	0.900082	528.889	13.2768	528.324	11.9664	526.86	27.7677			16.8489	1.7059	0.674267	3.73422	0.0824313	3.3218	0.889555	510.618	16.3074	523.304	15.2711	579.974	37.0402			16.9612	1.01491	0.729297	2.36283
	17.4244	0.906132	0.66022	2.96821	0.0834709	2.82652	0.952263	516.807	14.0375	514.748	11.9858	506.599	19.9425			17.4278	0.972117	0.677052	2.73493	0.0856157	2.55633	0.934697	529.555	12.9961	524.991	11.2116	506.135	21.3841			17.2892	1.21451	0.657379	2.87108	0.0824668	2.60155	0.906122	510.83	12.7766	513.009	11.5635	523.667	26.6398			17.025	1.1157	0.751904	2.73569
	17.4904	1.05338	0.65819	3.22676	0.0835292	3.04997	0.945214	517.154	15.157	513.507	13.0058	498.243	23.1935			17.3491	1.2118	0.681801	2.66532	0.0858268	2.37392	0.890669	530.809	12.0962	527.862	10.9719	516.076	26.5935			16.9089	1.42307	0.672424	3.70585	0.0824983	3.42172	0.923331	511.018	16.8106	522.185	15.1303	572.283	30.9464			16.5062	1.0888	0.779473	3.31474
	17.206	1.14671	0.669107	2.61799	0.0835342	2.35349	0.898969	517.184	11.6964	520.17	10.6568	534.263	25.1044			17.2847	0.894559	0.685506	2.8618	0.0859726	2.71839	0.949889	531.674	13.8731	530.097	11.8187	524.245	19.6085			17.2659	1.56649	0.65865	3.98519	0.0825146	3.6644	0.919505	511.115	18.0061	513.788	16.07	526.675	34.3343			16.6415	1.23207	0.780373	3.25851
	17.2877	0.923222	0.666295	3.09609	0.0835778	2.95524	0.954507	517.443	14.6941	518.457	12.5713	523.864	20.2618			17.1029	1.29788	0.694831	3.02983	0.0862256	2.73777	0.903605	533.176	14.0098	535.699	12.6132	547.386	28.3518			16.9185	1.49466	0.672234	4.73648	0.0825221	4.49446	0.948904	511.159	22.0867	522.07	19.3358	571.035	32.5191			16.5691	1.46198	0.796952	3.23352
	17.4561	1.81899	0.660429	3.60374	0.0836489	3.11099	0.863265	517.866	15.4806	514.877	14.5552	502.565	40.0207			17.2707	1.60303	0.690788	2.73005	0.0865649	2.20985	0.809456	535.189	11.3493	533.274	11.3259	526.061	35.149			17.2576	1.58141	0.659075	3.74701	0.0825282	3.39694	0.906575	511.196	16.6944	514.048	15.1153	527.727	34.6556			16.6906	1.49788	0.793165	3.0563
	17.2709	0.857814	0.669167	3.07847	0.0838565	2.95654	0.960393	519.101	14.7458	520.206	12.5321	526.034	18.8182			17.1908	1.56899	0.694187	3.21367	0.0865883	2.80462	0.872717	535.328	14.4075	535.313	13.3712	536.221	34.3557			17.3271	1.40764	0.656637	3.53492	0.082554	3.24257	0.917294	511.349	15.9403	512.555	14.2278	518.869	30.8846			16.4315	1.27162	0.82281	3.37795
	17.3111	1.0823	0.667863	3.32518	0.0838879	3.14411	0.945547	519.288	15.6867	519.412	13.5206	520.896	23.7603			17.2028	1.61845	0.705582	2.81111	0.0880713	2.29847	0.817637	544.12	11.9932	542.12	11.8087	534.648	35.442			17.3226	1.51496	0.657476	3.79798	0.0826383	3.48275	0.917	511.851	17.1372	513.069	15.2985	519.431	33.2687			16.8139	1.00363	0.8084	3.21749
	17.3093	0.990172	0.668925	2.44954	0.0840124	2.2405	0.914659	520.028	11.1937	520.059	9.96942	521.125	21.7055			16.936	1.4762	0.723986	3.12709	0.0889667	2.75672	0.881562	549.423	14.5186	553.017	13.335	568.811	32.111			16.8236	1.4553	0.678061	4.13231	0.0827704	3.86757	0.935934	512.638	19.0588	525.602	16.956	583.244	31.5923			16.7997	1.30681	0.820341	3.04463
	17.2536	0.983658	0.673326	2.86781	0.0842931	2.69384	0.939336	521.697	13.5001	522.732	11.7178	528.234	21.5706			16.7658	1.28209	0.758669	2.97212	0.0922921	2.68137	0.902174	569.079	14.605	573.242	13.0193	590.714	27.8031			17.3669	1.14053	0.657693	3.56465	0.0828768	3.37727	0.947432	513.271	16.6624	513.202	14.3614	513.828	25.0556			16.2257	1.25484	0.852963	3.01251
	16.8871	1.38696	0.689497	2.94908	0.084484	2.60257	0.882504	522.832	13.0699	532.498	12.2212	575.065	30.1508			16.5691	1.07739	0.772499	2.96922	0.092872	2.76686	0.931847	572.5	15.1573	581.196	13.1404	616.243	23.2641			17.5252	1.48792	0.651922	3.273	0.0828984	2.91524	0.890694	513.4	14.3864	509.661	13.1162	493.881	32.8224			16.6579	1.09863	0.831309	3.0412
	17.4512	0.974926	0.667235	2.32585	0.0844872	2.11166	0.907908	522.851	10.605	519.03	9.45162	503.214	21.437			16.9481	1.07553	0.75791	2.45563	0.0932022	2.20757	0.898983	574.447	12.1327	572.804	10.7505	567.254	23.4086			17.0155	1.28299	0.671748	3.47203	0.0829354	3.22629	0.929222	513.62	15.9279	521.775	14.167	558.577	27.961			16.1769	1.11016	0.87143	3.22663
	17.0476	0.939971	0.683186	2.43364	0.0845064	2.24478	0.922398	522.965	11.2759	528.698	10.0301	554.481	20.5018			16.5104	1.18481	0.778725	3.01658	0.0932888	2.77417	0.919639	574.958	15.2597	584.756	13.4105	623.902	25.5509			17.1593	1.61278	0.668143	3.7392	0.0831872	3.37351	0.902201	515.119	16.7014	519.583	15.2082	540.23	35.2682			16.1659	1.2336	0.877861	3.64883
	17.1918	1.09668	0.67849	2.76176	0.0846354	2.53469	0.917779	523.732	12.75	525.861	11.336	536.048	23.9938			16.6817	1.20786	0.776053	2.85487	0.093933	2.58676	0.906088	578.756	14.3187	583.229	12.667	601.608	26.1314			17.0846	1.42025	0.673213	4.30442	0.0834534	4.06336	0.943998	516.703	20.1762	522.664	17.5869	549.733	31.0226			16.4771	0.999374	0.872098	2.72609
	17.3106	1.13226	0.674248	2.77339	0.0846874	2.53174	0.912867	524.041	12.7424	523.292	11.3412	520.96	24.8336			16.69	1.02105	0.791612	3.11676	0.095864	2.94477	0.944817	590.125	16.6061	592.086	13.9839	600.529	22.1057			17.2651	1.26788	0.666176	3.14292	0.0834537	2.87583	0.91502	516.705	14.2796	518.385	12.7601	526.77	27.7931			16.2571	1.03604	0.89732	2.82627
	17.4536	0.973803	0.669341	2.38573	0.0847657	2.17793	0.912902	524.506	10.971	520.312	9.71329	502.897	21.4336			16.7058	1.36674	0.792861	3.09099	0.0961065	2.7724	0.896932	591.551	15.6702	592.793	13.8805	598.474	29.5795			17.1676	1.45808	0.670601	3.82786	0.0835337	3.53928	0.924611	517.181	17.5895	521.078	15.6031	539.128	31.9062			15.9921	1.47614	0.94375	3.02301
	17.317	0.874502	0.676134	2.33735	0.0849558	2.16759	0.927371	525.636	10.9415	524.435	9.57394	520.145	19.1708			16.8502	1.59705	0.790361	2.78263	0.0966314	2.27871	0.818902	594.637	12.9439	591.377	12.4736	579.81	34.6782			16.7715	1.09402	0.687099	3.5057	0.083614	3.33062	0.950059	517.659	16.5672	531.056	14.4981	590.004	23.7069			15.3812	2.43985	1.02367	3.89367
	17.2148	1.02612	0.680465	2.89224	0.0849956	2.7041	0.934949	525.872	13.6556	527.055	11.8922	533.116	22.4757			16.6792	1.05754	0.802011	3.02219	0.0970605	2.83112	0.936777	597.159	16.1469	597.963	13.6584	601.932	22.8734			17.5008	1.26164	0.659078	3.14092	0.0836917	2.87639	0.91578	518.121	14.32	514.05	12.6701	496.946	27.7877			13.9362	1.44443	1.28268	3.81564
	17.388	1.01498	0.674569	2.47441	0.0851066	2.25666	0.912	526.532	11.4097	523.487	10.1214	511.161	22.3173			16.679	1.03358	0.80346	2.63413	0.0972346	2.42288	0.919803	598.182	13.8412	598.779	11.9164	601.958	22.3504			16.9398	1.32325	0.682492	3.20917	0.0838867	2.92366	0.911033	519.281	14.5866	528.28	13.2188	568.321	28.8205			14.6421	1.13047	1.25326	3.55461
	17.2508	1.30147	0.681933	2.46428	0.0853571	2.09257	0.849162	528.02	10.6088	527.942	10.1454	528.582	28.5056			16.4732	0.812136	0.816328	3.1016	0.0975732	2.99339	0.96511	600.171	17.1545	605.997	14.1552	628.764	17.52			16.9684	1.32982	0.68146	3.75145	0.0839013	3.50784	0.935063	519.367	17.504	527.656	15.4389	564.605	28.9859			14.8611	1.14848	1.32871	3.26132
	17.371	0.903021	0.681741	2.71631	0.0859272	2.56181	0.943123	531.405	13.0676	527.826	11.1812	513.341	19.8318			16.4719	1.1686	0.818656	3.59117	0.0978438	3.39571	0.945573	601.76	19.5094	607.298	16.4155	628.933	25.1794			17.3418	1.52923	0.668337	4.19429	0.0840961	3.90558	0.931165	520.526	19.5305	519.701	17.0624	517.01	33.5704			14.1464	0.854193	1.57781	2.49518
	17.197	0.897071	0.713464	2.40875	0.0890252	2.23548	0.928064	549.77	11.7805	546.801	10.1844	535.405	19.636			16.7105	1.81839	0.827028	3.50367	0.100276	2.99485	0.854776	616.026	17.595	611.962	16.1051	597.891	39.4072			17.137	1.07391	0.676343	2.61552	0.0840985	2.38488	0.91182	520.54	11.9263	524.562	10.7154	543.036	23.4972			14.1303	1.06996	1.57095	2.60463
	16.9745	1.09189	0.724398	2.67087	0.0892198	2.43749	0.912617	550.921	12.8708	553.26	11.3931	563.825	23.7828			16.4751	0.922275	0.843207	2.65038	0.100798	2.48474	0.937503	619.081	14.667	620.914	12.3117	628.516	19.8935			16.4643	1.82993	0.704754	3.85636	0.0841915	3.39454	0.880243	521.093	16.9927	541.626	16.189	629.932	39.4253			14.0399	1.04832	1.58624	2.97068
	17.122	1.22455	0.719041	2.68047	0.0893299	2.38441	0.889548	551.573	12.6048	550.1	11.3848	544.961	26.7715			23.2971	2.51949	0.618281	21.292	0.104514	21.1424	0.992974	640.811	128.984	488.77	82.7824	NA	NA			17.4371	1.49284	0.665638	3.83686	0.0842171	3.53454	0.921205	521.245	17.6985	518.057	15.5703	504.976	32.8341			14.0382	0.9819	1.63079	3.57978
	16.727	1.30752	0.800091	2.98647	0.0971056	2.68503	0.899065	597.424	15.3202	596.88	13.479	595.732	28.3097			14.9018	1.11336	1.14345	3.32546	0.123636	3.13355	0.94229	751.457	22.2267	774.145	18.0149	841.079	23.1765			17.2696	1.20941	0.672556	3.04713	0.0842751	2.79684	0.917861	521.59	14.0135	522.266	12.442	526.196	26.4945			14.0056	1.02058	1.60993	3.57046
	16.7374	1.1118	0.810463	2.90783	0.0984258	2.68689	0.924019	605.177	15.5206	602.714	13.2181	594.422	24.0864			14.2255	0.758894	1.50688	2.84596	0.155537	2.74292	0.963792	931.928	23.8003	933.175	17.3719	937.025	15.5473			17.2446	1.28393	0.673612	2.97038	0.0842849	2.67856	0.901756	521.648	13.4223	522.906	12.14	529.379	28.1335			13.9016	1.11512	1.59689	3.18122
	16.5911	0.928641	0.819091	2.65899	0.0986044	2.49155	0.937031	606.225	14.416	607.541	12.1575	613.372	20.0613			14.1343	1.10846	1.51094	2.30147	0.154956	2.01695	0.876373	928.687	17.4445	934.821	14.0629	950.176	22.7034			17.4487	1.50944	0.667491	4.1829	0.0845078	3.90106	0.93262	522.973	19.5959	519.186	17.0032	503.53	33.2063			13.8823	0.92891	1.69542	2.57623
	16.4126	1.117	0.843405	3.04465	0.100439	2.83235	0.930272	616.979	16.6649	621.023	14.1453	636.746	24.0488			14.0531	0.913335	1.64126	2.20645	0.167354	2.00854	0.910305	997.518	18.5624	986.198	13.9225	961.997	18.6386			17.4179	0.982644	0.668786	3.39878	0.0845222	3.25363	0.957294	523.059	16.3463	519.974	13.8314	507.379	21.6202			13.8818	0.992001	1.4948	2.71888
	16.3276	1.33808	0.883725	2.76522	0.104695	2.41992	0.875126	641.867	14.7844	642.993	13.173	647.902	28.762			13.9774	1.18474	1.58797	2.7712	0.161048	2.50518	0.904005	962.6	22.4008	965.5	17.2672	973.016	24.1405			17.2226	1.43973	0.676648	3.55868	0.0845572	3.25444	0.914507	523.267	16.3566	524.747	14.5838	532.165	31.512			13.861	1.09123	1.60343	2.7571
	15.8148	0.856201	0.980783	2.82857	0.112544	2.69588	0.953087	687.508	17.5803	694.007	14.222	716.05	18.2012			13.8821	1.10665	1.68103	3.3208	0.169324	3.13098	0.94284	1008.39	29.2271	1001.37	21.1451	986.914	22.5001			17.3469	1.09391	0.672188	3.13793	0.084606	2.94108	0.937268	523.557	14.7896	522.042	12.8086	516.355	24.0107			13.8565	1.49723	1.67554	3.40385
	15.6006	1.1158	0.99727	2.84814	0.112886	2.62047	0.920065	689.489	17.1352	702.423	14.441	744.915	23.5879			13.8651	0.762435	1.51286	2.67512	0.152199	2.56417	0.958525	913.276	21.8348	935.597	16.3547	989.409	15.5045			17.2959	1.23025	0.678531	3.84464	0.0851532	3.64249	0.94742	526.809	18.4258	525.886	15.7819	522.819	26.9794			13.854	1.75942	1.58728	3.68104
	15.8202	1.04488	1.04845	2.22322	0.12035	1.96238	0.882675	732.579	13.5893	728.113	11.5546	715.312	22.2162			13.8198	0.799961	1.65557	2.22295	0.166011	2.07403	0.933005	990.096	19.0357	991.682	14.0727	996.082	16.2559			16.743	1.42342	0.701181	3.44522	0.0851827	3.13742	0.910659	526.984	15.876	539.496	14.4197	593.696	30.8524			13.8437	1.08165	1.63043	2.97054
	14.5444	1.26558	1.43824	2.71488	0.151781	2.40185	0.884699	910.938	20.4039	904.989	16.262	891.414	26.1374			13.8143	0.967072	1.62729	2.32329	0.16311	2.11245	0.90925	974.038	19.0971	980.813	14.6124	996.876	19.6424			17.2754	1.3636	0.680714	3.80585	0.0853257	3.55317	0.93361	527.833	18.0076	527.206	15.6526	525.426	29.9137			13.7941	1.15571	1.68109	2.98459
	14.5149	1.03012	1.46111	2.80039	0.15388	2.60404	0.929886	922.678	22.3867	914.465	16.8826	895.588	21.2602			13.7686	1.06621	1.65559	2.8517	0.165397	2.64488	0.927475	986.702	24.1981	991.69	18.0539	1003.6	21.6229			17.2966	1.32144	0.679953	3.41354	0.0853352	3.14739	0.92203	527.89	15.9527	526.746	14.0296	522.726	28.9772			13.7797	1.17012	1.71626	2.97799
	14.2681	1.17475	1.57135	2.89115	0.162678	2.64172	0.913727	971.641	23.8273	958.96	17.9414	930.861	24.1126			13.7425	1.01911	1.65424	2.63348	0.16495	2.4283	0.922087	984.225	22.1649	991.175	16.667	1007.45	20.6639			16.6193	1.6145	0.708141	3.94499	0.0853925	3.5995	0.912421	528.23	18.2555	543.642	16.6078	609.711	34.908			13.7772	1.40343	1.65798	4.15298
	14.1306	0.788948	1.53539	2.38479	0.157423	2.25051	0.943692	942.44	19.7322	944.661	14.6651	950.727	16.1524			13.737	1.13084	1.6361	2.95581	0.163075	2.73094	0.923922	973.845	24.6838	984.212	18.6296	1008.27	22.9251			17.0441	1.55095	0.690634	4.15003	0.0854101	3.84933	0.927542	528.334	19.5263	533.182	17.2156	554.906	33.8448			13.7493	1.24191	1.70417	2.99438
	14.0944	0.955973	1.56024	2.86647	0.159561	2.70236	0.942749	954.337	23.9716	954.562	17.7391	955.951	19.5392			13.7209	1.04562	1.60483	3.27201	0.159772	3.10044	0.947565	955.509	27.5342	972.096	20.4717	1010.64	21.2014			17.0836	1.31267	0.689729	3.63028	0.0854959	3.38464	0.932337	528.844	17.185	532.638	15.0475	549.883	28.6843			13.7482	1.13121	1.54287	3.77058
	14.0293	1.11819	1.60456	3.06208	0.163334	2.85061	0.930939	975.279	25.8007	971.988	19.1567	965.463	22.8294			13.6699	3.18148	1.80021	4.02453	0.178556	2.46477	0.612435	1059.08	24.0725	1045.54	26.277	1018.19	64.448			17.2751	1.27935	0.692568	2.65249	0.08681	2.32357	0.875994	536.643	11.9644	534.342	11.0209	525.463	28.0612			13.7467	1.08686	1.73004	3.09281
	13.9817	1.05958	1.56159	2.46051	0.158421	2.22067	0.902525	947.998	19.5772	955.099	15.2316	972.359	21.6196			13.6693	1.78257	1.74374	3.39912	0.172948	2.89422	0.85146	1028.33	27.5098	1024.85	21.9383	1018.28	36.104			16.2917	1.25856	0.73639	3.40569	0.0870484	3.16461	0.929212	538.057	16.3362	560.297	14.6665	652.595	27.0115			13.7443	1.08025	1.70108	2.68447
	13.9811	1.06724	1.57582	2.89943	0.159859	2.69586	0.929792	955.993	23.9525	960.723	18.0127	972.435	21.782			13.6646	1.64799	1.74652	2.96082	0.173164	2.45979	0.830781	1029.52	23.4054	1025.88	19.1198	1018.98	33.3823			16.7845	1.16266	0.727575	3.83468	0.088608	3.65418	0.952928	547.3	19.1739	555.129	16.3998	588.318	25.2236			13.7409	1.37859	1.7478	3.20736
	13.9715	1.01418	1.67039	2.71057	0.169335	2.51369	0.927365	1008.45	23.466	997.332	17.2177	973.876	20.6631			13.6587	0.9359	1.71544	2.56792	0.170009	2.3913	0.93122	1012.16	22.3994	1014.32	16.4735	1019.84	18.9501			16.8528	1.44569	0.760493	3.35826	0.0929939	3.03116	0.902597	573.219	16.6251	574.294	14.7311	579.497	31.3889			13.7217	0.997163	1.71069	3.34405
	13.9687	1.08365	1.58267	3.4403	0.160411	3.26518	0.949096	959.058	29.0971	963.418	21.4097	974.269	22.1021			13.617	0.758452	1.65287	2.90356	0.163308	2.80275	0.965281	975.134	25.364	990.65	18.3709	1026.04	15.342			16.558	1.00862	0.786733	3.54087	0.0945198	3.39417	0.958572	582.213	18.8953	589.317	15.8322	617.691	21.7856			13.6817	1.02065	1.73519	3.21953
	13.9388	1.02836	1.65923	3.10171	0.167811	2.92628	0.943439	1000.04	27.1072	993.081	19.6533	978.61	20.9539			13.5434	1.21852	1.75857	3.15906	0.172813	2.91459	0.922614	1027.59	27.6851	1030.32	20.4513	1036.98	24.6275			16.8196	1.34072	0.807817	3.4271	0.0985862	3.15397	0.920301	606.118	18.2456	601.229	15.5507	583.759	29.1031			13.6527	1.14781	1.67663	3.18894
	13.919	1.44434	1.58156	3.26531	0.159729	2.92851	0.896854	955.269	26.0012	962.985	20.315	981.549	29.4053			13.5379	1.08172	1.78913	2.7836	0.175744	2.56482	0.921405	1043.68	24.7141	1041.51	18.1324	1037.81	21.8624			16.7643	1.25613	0.812532	3.27634	0.0988359	3.02597	0.923584	607.583	17.5455	603.873	14.9144	590.902	27.2388			13.6301	1.10139	1.75918	2.59158
	13.8905	1.6842	1.70359	3.26743	0.1717	2.79993	0.85692	1021.47	26.4497	1009.88	20.9085	985.686	34.2619			13.5238	0.892881	1.7018	3.12862	0.166992	2.9985	0.958411	995.514	27.66	1009.21	20.0121	1039.91	18.0431			16.6151	1.41964	0.829631	3.80992	0.100017	3.53555	0.927986	614.511	20.723	613.407	17.5433	610.257	30.6915			13.6202	1.32138	1.81281	3.2014
	13.8419	0.880471	1.68281	2.57471	0.169013	2.41948	0.939711	1006.67	22.5498	1002.05	16.3999	992.83	17.8936			13.5212	0.889913	1.69287	2.40601	0.166084	2.23539	0.929083	990.496	20.5244	1005.85	15.3592	1040.3	17.9821			16.3744	1.59153	0.842041	3.83321	0.100043	3.4872	0.909733	614.661	20.4443	620.271	17.7939	641.752	34.2225			13.6059	1.04844	1.73254	2.89648
	13.8236	1.14659	1.57161	2.82121	0.157635	2.57771	0.913688	943.62	22.6274	959.061	17.5085	995.517	23.3022			13.507	1.26059	1.84412	2.84342	0.180733	2.54871	0.896355	1070.98	25.1493	1061.33	18.7224	1042.41	25.456			16.3704	1.2168	0.859421	3.3552	0.102083	3.12679	0.931922	626.603	18.6705	629.807	15.7475	642.283	26.179			13.6048	0.840722	1.70802	3.23365
	13.7666	0.929237	1.60966	2.15694	0.160787	1.94651	0.902441	961.146	17.3809	973.977	13.5096	1003.9	18.8526			13.5044	1.09992	1.7922	2.58343	0.17561	2.33758	0.904836	1042.94	22.5098	1042.63	16.8386	1042.82	22.2127			16.301	1.20553	0.870377	3.18804	0.102946	2.95132	0.925748	631.649	17.7578	635.772	15.0648	651.368	25.8978			13.5963	1.13659	1.7368	3.58263
	13.7529	0.827023	1.71475	2.3842	0.171113	2.23616	0.937911	1018.24	21.0624	1014.06	15.2924	1005.92	16.7796			13.4903	0.85537	1.68299	2.38586	0.164737	2.22726	0.933523	983.046	20.3073	1002.11	15.1974	1044.96	17.2721			16.3753	1.02836	0.879872	3.4086	0.104543	3.24977	0.953405	640.98	19.8283	640.914	16.2007	641.637	22.1315			13.5911	1.31452	1.63943	3.44188
	13.7521	1.08755	1.65367	3.08662	0.165007	2.88867	0.935871	984.544	26.3751	990.955	19.5329	1006.04	22.0623			13.4814	2.06225	1.84238	3.45694	0.18022	2.77445	0.802573	1068.17	27.3109	1060.71	22.7558	1046.29	41.596			15.9454	1.47782	0.948874	4.03542	0.109782	3.75508	0.930531	671.483	23.9461	677.516	19.9526	698.543	31.479			13.591	1.19781	1.7469	2.95639
	13.724	0.930724	1.71515	2.45568	0.170794	2.27247	0.925393	1016.48	21.3702	1014.21	15.7523	1010.18	18.855			13.4295	0.929657	1.78285	3.78332	0.173725	3.66732	0.96934	1032.6	34.9919	1039.22	24.6157	1054.05	18.7457			14.5505	1.57585	1.45157	3.79163	0.15325	3.44865	0.909541	919.158	29.5426	910.522	22.7993	890.518	32.5703			13.5766	1.22829	1.83489	2.86637
	13.678	1.14349	1.74593	2.91954	0.173276	2.68629	0.920107	1030.13	25.5747	1025.66	18.8509	1016.99	23.1628			13.417	1.16095	1.77205	2.76654	0.172512	2.51117	0.907692	1025.94	23.8177	1035.27	17.9592	1055.93	23.3785			14.355	1.35604	1.527	3.55984	0.159049	3.29145	0.924605	951.49	29.1164	941.295	21.8455	918.43	27.8682			13.57	1.15793	1.81737	3.29467
	13.6536	0.789029	1.53748	1.98409	0.152316	1.82045	0.917525	913.931	15.5121	945.496	12.2073	1020.6	15.9739			13.4133	0.916688	1.72235	2.39953	0.167627	2.21753	0.924151	999.026	20.5225	1016.9	15.4158	1056.48	18.4769			14.2178	1.33229	1.52289	3.71789	0.157104	3.47098	0.933589	940.661	30.38	939.639	22.7913	938.118	27.335			13.569	0.983382	1.69591	3.1693
	13.6278	0.841745	1.76299	1.94965	0.174326	1.75858	0.901997	1035.9	16.8289	1031.95	12.6322	1024.44	17.031			13.4097	1.27851	1.84938	2.86593	0.179942	2.56494	0.894979	1066.66	25.2157	1063.21	18.8895	1057.03	25.7434			14.1596	1.31373	1.54457	3.41862	0.158689	3.15612	0.923214	949.486	27.8647	948.328	21.0735	946.53	26.8904			13.5681	1.23264	1.83177	3.61844
	13.6254	0.862257	1.74558	2.78144	0.172575	2.64441	0.950735	1026.28	25.0891	1025.53	17.9577	1024.79	17.4449			13.3832	0.9444	1.76395	2.93129	0.171291	2.77499	0.946679	1019.22	26.1608	1032.3	18.9974	1061.01	19.0038			14.0566	1.31985	1.56218	3.83841	0.159331	3.60436	0.939024	953.06	31.9333	955.334	23.7675	961.479	26.984			13.5658	0.870925	1.81042	2.3611
	13.6049	0.906367	1.78387	2.46048	0.176095	2.28746	0.929679	1045.61	22.0789	1039.59	16.0103	1027.83	18.3489			13.3751	1.02359	1.80918	2.69612	0.175577	2.49426	0.925128	1042.76	24.0147	1048.78	17.6326	1062.24	20.594			14.0192	1.22947	1.58014	3.21004	0.160733	2.96525	0.923745	960.849	26.4701	962.423	19.964	966.908	25.0814			13.5543	1.08531	1.72159	3.00435
	13.6039	1.51204	1.80086	3.03548	0.177759	2.63209	0.867108	1054.72	25.6092	1045.77	19.8199	1027.98	30.5973			13.3717	0.904012	1.81705	2.23737	0.176296	2.04661	0.914737	1046.71	19.7733	1051.62	14.6545	1062.74	18.205			13.9421	1.83636	1.6657	3.6654	0.168506	3.17222	0.865449	1003.87	29.4895	995.551	23.2602	978.156	37.4017			13.5537	1.03347	1.80668	3.10479
	13.5985	0.792096	1.65876	2.26437	0.163668	2.12131	0.936821	977.129	19.2335	992.904	14.3453	1028.78	16.0155			13.3655	1.11939	1.80322	2.7241	0.174873	2.48349	0.911671	1038.9	23.8294	1046.63	17.7946	1063.67	22.5349			13.8771	1.11332	1.70542	3.25689	0.171719	3.0607	0.93976	1021.57	28.9158	1010.57	20.8493	987.685	22.6343			13.5498	1.02518	1.71502	2.82088
	13.5971	1.29092	1.74421	2.4835	0.172081	2.12163	0.854289	1023.57	20.0801	1025.02	16.0292	1028.99	26.1219			13.347	1.0124	1.80084	2.79899	0.1744	2.60948	0.932293	1036.31	24.9807	1045.76	18.2753	1066.47	20.3452			13.8284	1.33677	1.69257	3.49262	0.169826	3.22667	0.923855	1011.15	30.1968	1005.73	22.2962	994.806	27.1558			13.509	1.29431	1.81252	3.34097
	13.5184	1.11624	1.77747	2.62571	0.174347	2.37662	0.905137	1036.02	22.7457	1037.25	17.0636	1040.72	22.5496			13.3351	1.02177	1.71686	3.36285	0.16612	3.20386	0.952723	990.696	29.4221	1014.85	21.581	1068.25	20.5252			13.808	1.06881	1.68754	3.46033	0.169073	3.29113	0.951103	1007	30.683	1003.84	22.0656	997.8	21.694			13.4856	1.09672	1.8158	2.74533
	13.5157	0.872396	1.76641	2.50065	0.173228	2.34354	0.937172	1029.87	22.3063	1033.2	16.2142	1041.12	17.6253			13.2685	0.943429	1.85575	2.45588	0.178662	2.26744	0.92327	1059.66	22.1563	1065.48	16.2059	1078.3	18.9321			13.7705	1.03735	1.75568	3.33823	0.175422	3.17296	0.950492	1041.92	30.5265	1029.26	21.5987	1003.32	21.0378			13.4736	1.35336	1.81981	2.61605
	13.5105	1.06894	1.75384	2.64339	0.171929	2.41762	0.914591	1022.73	22.8643	1028.58	17.0956	1041.9	21.5904			13.2608	0.835119	1.91901	3.08533	0.184643	2.97016	0.962671	1092.29	29.8433	1087.72	20.5984	1079.46	16.74			13.7364	1.59444	1.67119	4.02681	0.166566	3.6977	0.91827	993.165	34.0354	997.638	25.5861	1008.35	32.3217			13.4607	1.03801	1.89636	3.0852
	13.4733	0.889053	1.8112	3.02339	0.177063	2.88972	0.955787	1050.91	28.0223	1049.51	19.7813	1047.5	17.9451			13.2562	0.768864	1.76194	2.46079	0.169472	2.33759	0.949935	1009.2	21.8371	1031.56	15.941	1080.14	15.4264			13.6834	1.19583	1.64991	4.00109	0.163811	3.81821	0.954292	977.921	34.6452	989.516	25.3004	1016.18	24.2179			13.4565	1.1065	1.76862	2.98049
	13.4411	0.797489	1.8439	2.92539	0.17983	2.8146	0.962125	1066.04	27.6553	1061.25	19.2615	1052.32	16.0871			13.2401	0.907549	1.80335	2.58705	0.173244	2.42264	0.936449	1029.96	23.061	1046.67	16.8996	1082.6	18.1839			13.6797	1.54223	1.69289	3.36514	0.168032	2.99094	0.8888	1001.26	27.7374	1005.85	21.4837	1016.74	31.261			13.4526	1.14019	1.79213	2.45762
	13.4345	0.939282	1.81297	2.51282	0.176725	2.33066	0.927511	1049.06	22.5644	1050.15	16.4457	1053.31	18.9414			13.2259	0.946048	1.94221	2.90404	0.186384	2.74562	0.945449	1101.76	27.8065	1095.76	19.4674	1084.76	18.9508			13.6572	1.38649	1.8102	3.75676	0.17938	3.49155	0.929404	1063.59	34.2342	1049.15	24.5764	1020.07	28.0725			13.4255	0.973636	1.72384	2.88425
	13.4175	0.829839	1.75862	2.78113	0.171211	2.65444	0.954446	1018.78	25.0144	1030.34	18.0043	1055.86	16.7292			13.2076	0.962889	1.85593	2.52296	0.177858	2.33199	0.924307	1055.26	22.7001	1065.54	16.6492	1087.5	19.2897			13.6551	1.19339	1.72995	3.94788	0.171403	3.76318	0.953217	1019.84	35.4968	1019.73	25.4076	1020.37	24.1491			13.4126	0.997747	1.78633	2.92228
	13.4172	0.834667	1.76121	1.70148	0.171459	1.48269	0.871412	1020.15	13.9895	1031.29	11.0201	1055.91	16.8273			13.2058	1.40535	1.9932	3.17799	0.190987	2.85037	0.89691	1126.72	29.4659	1113.21	21.4913	1087.81	28.1657			13.644	1.19269	1.67367	2.93617	0.165692	2.68302	0.913782	988.33	24.5845	998.582	18.6648	1022.02	24.1604			13.4091	1.10862	1.85234	3.24373
	13.4022	0.964962	1.82929	2.83563	0.177887	2.6664	0.940317	1055.42	25.9589	1056.02	18.618	1058.16	19.4293			13.1354	0.870038	1.88246	2.73519	0.179414	2.59313	0.948061	1063.77	25.4294	1074.93	18.1396	1098.52	17.4109			13.6138	1.13133	1.66102	3.19743	0.164074	2.99059	0.935312	979.38	27.173	993.765	20.2682	1026.51	22.9032			13.4001	0.882706	1.91442	2.3751
	13.402	1.14858	1.74958	2.48029	0.170133	2.19831	0.886314	1012.85	20.6046	1027.01	16.0264	1058.19	23.134			13.1176	1.06736	1.89935	2.7869	0.180779	2.5744	0.923751	1071.23	25.4083	1080.86	18.5397	1101.19	21.3506			13.5911	1.32041	1.80275	3.80784	0.177778	3.57158	0.937954	1054.82	34.7534	1046.46	24.8741	1029.89	26.7131			13.3973	0.890102	1.84496	2.2918
	13.3953	1.10719	1.7283	3.208	0.167981	3.01087	0.938553	1000.98	27.9151	1019.12	20.6372	1059.19	22.2969			13.0572	1.35469	1.94942	2.78927	0.18469	2.43821	0.874138	1092.55	24.5036	1098.25	18.7214	1110.41	27.0784			13.5312	1.51635	1.79546	3.13216	0.176279	2.74064	0.875	1046.61	26.4767	1043.81	20.4294	1038.81	30.6343			13.3858	0.956654	1.79788	3.29109
	13.3889	0.90299	1.77433	2.55605	0.172372	2.39123	0.935519	1025.17	22.6644	1036.11	16.6002	1060.16	18.1772			13.0571	1.01537	1.98982	2.89728	0.188516	2.71353	0.936579	1113.33	27.7459	1112.06	19.5813	1110.42	20.2808			13.5288	1.08817	1.62805	3.27943	0.159814	3.09363	0.943344	955.742	27.4799	981.106	20.6311	1039.17	21.9866			13.3818	1.26168	1.8096	2.96397
	13.3879	0.867328	1.74855	2.09488	0.169856	1.9069	0.910267	1011.32	17.8482	1026.63	13.5329	1060.3	17.4595			13.0042	1.24785	1.79341	2.91387	0.16922	2.63316	0.903663	1007.81	24.567	1043.07	18.9975	1118.57	24.8855			13.526	1.19364	1.81574	3.55678	0.178201	3.35051	0.942006	1057.14	32.6681	1051.15	23.2929	1039.59	24.1157			13.3602	0.872157	1.82845	3.29439
	13.2932	0.658175	1.81148	2.38042	0.174723	2.28762	0.961015	1038.08	21.934	1049.61	15.5746	1074.58	13.2166			13.0017	0.922304	2.08562	2.15769	0.196755	1.95063	0.904039	1157.86	20.6735	1144.09	14.8096	1118.95	18.4058			13.5178	1.59525	1.61496	4.311	0.1584	4.00498	0.929015	947.877	35.3036	976.035	27.04	1040.81	32.2168			13.35	1.2603	1.86017	3.50127
	13.2836	1.13176	1.85633	2.94374	0.17892	2.71748	0.923141	1061.07	26.5865	1065.68	19.428	1076.02	22.7034			12.9392	0.919264	2.00879	2.25317	0.188595	2.05711	0.912988	1113.76	21.0414	1118.48	15.2756	1128.56	18.3242			13.5159	1.1466	1.70968	3.38514	0.167667	3.18504	0.940889	999.242	29.4825	1012.17	21.6905	1041.1	23.1602			13.3363	1.29947	1.85262	3.73227
	13.2691	1.1087	1.78688	2.46887	0.172038	2.20593	0.893496	1023.33	20.8734	1040.69	16.0747	1078.2	22.2522			12.9336	0.901336	2.06268	2.87893	0.193571	2.7342	0.949727	1140.69	28.5853	1136.51	19.69	1129.4	17.9679			13.5096	1.38892	1.83528	3.22409	0.179901	2.90958	0.90245	1066.43	28.5982	1058.17	21.1937	1042.03	28.0481			13.3286	1.37238	1.76751	3.28645
	13.2626	1.08869	1.78373	3.24115	0.171652	3.05283	0.941899	1021.2	28.8319	1039.54	21.0908	1079.17	21.8285			12.8373	1.09706	2.08569	2.79148	0.194272	2.56686	0.919536	1144.48	26.9173	1144.11	19.1608	1144.25	21.7923			13.5091	1.67755	1.77054	4.50594	0.173548	4.18202	0.928113	1031.63	39.8684	1034.72	29.2467	1042.11	33.8726			13.2914	0.886961	1.86483	2.90826
	13.2526	0.999976	1.84206	2.31331	0.177129	2.08601	0.901744	1051.27	20.235	1060.6	15.2253	1080.7	20.0441			12.8203	0.63951	2.05282	2.76109	0.190958	2.68601	0.972807	1126.56	27.7632	1133.23	18.8543	1146.9	12.705			13.4767	1.37756	1.78058	3.56237	0.174113	3.28524	0.922206	1034.73	31.4058	1038.39	23.167	1046.99	27.7988			13.2911	1.02884	1.84859	2.96154
	13.252	0.773378	1.73908	2.82082	0.16722	2.71273	0.961682	996.775	25.0532	1023.12	18.1872	1080.77	15.5057			12.8079	1.16536	1.89752	3.43889	0.176341	3.23541	0.94083	1046.95	31.2659	1080.22	22.8708	1148.85	23.1557			13.4757	0.875768	1.73156	3.10246	0.169307	2.97628	0.959331	1008.29	27.7807	1020.33	19.9718	1047.14	17.6787			13.2884	0.988898	1.79345	3.24414
	13.2484	1.06886	1.89234	2.77657	0.181907	2.5626	0.922935	1077.39	25.4254	1078.4	18.4475	1081.34	21.4279			12.803	0.825314	2.10862	2.99392	0.195884	2.87791	0.961254	1153.17	30.3885	1151.63	20.6234	1149.59	16.3789			13.4538	1.24895	1.7381	3.17655	0.169671	2.92072	0.919462	1010.3	27.3121	1022.76	20.4772	1050.42	25.1918			13.2669	0.984971	1.90538	2.59824
	13.2267	0.8504	1.62467	2.5123	0.15592	2.36399	0.940968	934.065	20.5561	979.798	15.7916	1084.65	17.0514			12.7907	1.05929	2.06095	3.3499	0.191271	3.178	0.948687	1128.26	32.8939	1135.93	22.9058	1151.49	21.0322			13.4538	1.65982	1.71324	4.1007	0.167244	3.74976	0.914421	996.91	34.635	1013.5	26.2975	1050.42	33.4538			13.2488	1.26882	1.82664	3.23047
	13.208	1.20722	1.90437	2.71102	0.182505	2.42739	0.89538	1080.64	24.1508	1082.62	18.0513	1087.44	24.1771			12.7903	0.964947	2.10631	2.67134	0.195474	2.49097	0.93248	1150.96	26.2565	1150.87	18.3943	1151.55	19.1575			13.453	1.2621	1.66863	3.13337	0.16288	2.86794	0.915291	972.759	25.8954	996.666	19.8961	1050.54	25.456			13.247	1.17923	1.90478	3.40471
	13.195	1.02098	1.87112	2.73098	0.179143	2.53295	0.927488	1062.29	24.8073	1070.93	18.0736	1089.44	20.4389			12.7871	1.07271	2.0342	2.88588	0.188736	2.67911	0.92835	1114.52	27.4208	1127.02	19.6477	1152.04	21.3145			13.4239	1.2512	1.90478	3.5043	0.185529	3.27332	0.934086	1097.11	33.0224	1082.76	23.3366	1054.9	25.2004			13.2203	1.14219	2.00909	3.25227
	13.1701	0.801238	1.91792	2.17299	0.183277	2.01987	0.929538	1084.85	20.1681	1087.35	14.5035	1093.2	16.0265			12.7869	1.12399	2.00759	3.3336	0.186264	3.13839	0.941444	1101.1	31.767	1118.08	22.5981	1152.07	22.3209			13.4153	1.08601	1.74212	3.06186	0.169577	2.86279	0.934984	1009.78	26.7577	1024.25	19.7543	1056.18	21.8768			13.1921	0.875686	1.85208	2.73568
	13.1472	1.54425	1.93323	2.66791	0.184419	2.17556	0.815452	1091.07	21.8369	1092.66	17.856	1096.69	30.8915			12.7527	1.04252	2.09374	2.91589	0.193737	2.72315	0.933902	1141.59	28.4903	1146.75	20.0399	1157.38	20.6807			13.3873	1.29714	1.69574	3.37171	0.164718	3.11221	0.923036	982.945	28.3733	1006.93	21.539	1060.39	26.1139			13.1604	1.22011	1.88936	3.24059
	13.1395	1.26926	1.67226	2.7731	0.159431	2.46557	0.889104	953.613	21.8557	998.046	17.6224	1097.85	25.3968			12.7523	1.14302	1.91199	2.83834	0.176914	2.59802	0.915329	1050.09	25.1756	1085.28	18.9252	1157.45	22.692			13.2717	1.06296	1.88698	3.13037	0.181711	2.94437	0.940583	1076.31	29.1865	1076.52	20.7783	1077.8	21.3204			13.1513	1.24497	1.79029	2.98084
	13.0786	0.9785	1.80555	3.23066	0.17134	3.07891	0.953029	1019.49	29.0332	1047.47	21.1142	1107.17	19.5354			12.6963	0.808571	2.03774	2.91944	0.187722	2.80524	0.960881	1109.02	28.5819	1128.21	19.8877	1166.17	16.038			13.2691	1.25103	1.8252	2.43971	0.175727	2.09454	0.85852	1043.59	20.1809	1054.56	16.0053	1078.2	25.0897			13.1111	1.05435	2.02315	3.36869
	13.0238	0.945959	1.93503	2.57102	0.182857	2.39067	0.929853	1082.57	23.8243	1093.28	17.2128	1115.53	18.8799			12.6841	0.807625	2.14076	2.48939	0.197023	2.35474	0.945911	1159.31	24.9849	1162.07	17.2305	1168.07	16.0136			13.2595	1.39534	1.76507	3.32041	0.169815	3.01299	0.907417	1011.09	28.1954	1032.71	21.5249	1079.66	27.9876			13.095	0.889791	1.84983	2.69207
	13.0102	0.900784	2.00784	3.18595	0.189541	3.05595	0.959198	1118.89	31.39	1118.16	21.5978	1117.65	17.9552			12.5968	0.915369	2.16742	3.33184	0.198103	3.20363	0.96152	1165.12	34.1478	1170.65	23.1541	1181.77	18.0976			13.2467	1.29602	1.8428	3.28785	0.177123	3.02163	0.919032	1051.24	29.31	1060.86	21.6441	1081.58	25.9989			13.0867	0.894007	2.0718	3.26182
	12.9857	1.07967	2.01338	2.98767	0.189705	2.78577	0.93242	1119.78	28.6355	1120.03	20.2718	1121.42	21.5402			12.5551	1.07838	2.22272	2.33498	0.202485	2.07105	0.886966	1188.66	22.4815	1188.23	16.3536	1188.32	21.3051			13.2102	1.27257	1.88197	3.38317	0.180389	3.1347	0.926559	1069.1	30.8817	1074.76	22.4361	1087.14	25.4888			13.0845	1.10989	1.9847	2.84047
	12.9743	0.890051	1.97521	2.93348	0.185945	2.79519	0.95286	1099.37	28.2522	1107.09	19.7771	1123.14	17.7351			12.5402	0.951839	2.12169	2.80281	0.193053	2.63623	0.940569	1137.89	27.4993	1155.89	19.345	1190.66	18.7836			13.2031	1.3381	1.86918	3.85307	0.179066	3.61326	0.937761	1061.87	35.3751	1070.24	25.4931	1088.19	26.7979			13.065	1.05609	1.9854	2.71236
	12.9242	0.909872	2.05879	3.02474	0.193064	2.88465	0.953684	1137.95	30.0921	1135.22	20.6748	1130.84	18.1373			12.5187	1.38306	2.18924	2.92864	0.198857	2.58149	0.881463	1169.18	27.6035	1177.62	20.4155	1194.04	27.2946			13.172	1.78827	1.77561	4.07694	0.169702	3.66381	0.898667	1010.47	34.2662	1036.57	26.4881	1092.91	35.8058			13.033	1.17732	1.85149	3.11487
	12.9178	0.803742	2.07866	2.67383	0.194832	2.55017	0.953752	1147.5	26.8068	1141.79	18.333	1131.82	15.999			12.4942	1.0141	2.16887	2.50741	0.19662	2.29318	0.914563	1157.14	24.2902	1171.12	17.4272	1197.93	19.9862			13.1635	1.28778	1.89252	3.97854	0.18076	3.76436	0.946166	1071.12	37.1497	1078.47	26.4372	1094.23	25.7858			12.9728	1.1889	2.04432	2.44833
	12.8674	1.05073	1.97828	2.52253	0.1847	2.29328	0.909119	1092.6	23.0482	1108.13	17.0149	1139.61	20.8786			12.438	0.964162	2.29561	2.81634	0.207174	2.64616	0.939574	1213.75	29.2755	1210.94	19.922	1206.81	18.9701			13.1495	1.20637	1.98523	3.96374	0.189412	3.7757	0.95256	1118.19	38.7612	1110.5	26.7713	1096.35	24.1477			12.9576	0.945047	2.02367	2.9804
	12.83	1.00197	1.92607	2.47188	0.179303	2.2597	0.914163	1063.16	22.1479	1090.18	16.5228	1145.42	19.9105			12.1954	1.17329	2.3042	3.10176	0.203894	2.87129	0.925697	1196.21	31.3484	1213.58	21.9665	1245.45	22.9976			13.1172	1.81166	1.85677	4.07636	0.17672	3.65166	0.895813	1049.03	35.3529	1065.84	26.9084	1101.26	36.2378			12.9322	1.1349	1.96183	2.68948
	12.8276	1.12355	1.91033	2.72848	0.177804	2.48641	0.911281	1054.97	24.1971	1084.7	18.1871	1145.79	22.3266			12.1532	0.970476	2.42086	2.89526	0.213475	2.72776	0.942149	1247.3	30.9345	1248.81	20.8071	1252.25	18.9884			13.0837	1.38471	1.95786	3.70283	0.185866	3.43417	0.927445	1098.94	34.6983	1101.15	24.8917	1106.38	27.6759			12.8964	1.02392	1.98078	3.41863
	12.8133	0.941716	1.90447	2.28505	0.177061	2.08198	0.91113	1050.9	20.1892	1082.65	15.2148	1147.98	18.7068			12.0431	0.972035	2.30531	2.99147	0.201445	2.82914	0.945736	1183.08	30.5794	1213.92	21.1882	1270.03	18.9532			13.0535	1.24914	1.98954	3.47556	0.188439	3.24333	0.933181	1112.91	33.1518	1111.97	23.4899	1110.97	24.9682			12.8003	1.14717	2.05436	2.47102
	12.7998	0.849862	1.92879	2.32859	0.179134	2.16796	0.93102	1062.24	21.2317	1091.12	15.5723	1150.09	16.8658			11.7562	0.850202	2.56627	2.75753	0.218905	2.62319	0.951283	1276.09	30.3695	1291.08	20.151	1316.93	16.4833			13.0511	1.32403	1.91835	3.78163	0.181661	3.54227	0.936704	1076.04	35.1054	1087.49	25.2458	1111.35	26.4438			12.7791	1.16528	1.97129	3.16309
	12.7647	1.61241	2.09143	2.83253	0.193705	2.32882	0.822168	1141.41	24.3613	1146	19.46	1155.52	32			11.4622	0.819949	2.75938	2.24535	0.229492	2.09028	0.930938	1331.83	25.1517	1344.62	16.7359	1365.85	15.7888			13.0313	1.42906	1.98096	3.83758	0.187306	3.56157	0.928078	1106.76	36.2204	1109.05	25.9	1114.37	28.5288			12.7724	1.39116	2.09538	2.55569
	12.7436	0.985239	2.04711	2.55092	0.189287	2.35298	0.922403	1117.51	24.142	1131.33	17.4029	1158.79	19.5511			11.1876	0.8683	2.82371	2.9103	0.229215	2.77775	0.954455	1330.38	33.3911	1361.85	21.8258	1412.4	16.6127			13.0209	1.29299	2.04052	3.39033	0.192783	3.13409	0.92442	1136.43	32.6543	1129.13	23.1068	1116.01	25.8244			12.7688	1.07687	2.13658	3.66133
	12.6522	0.898765	2.18306	2.75045	0.20041	2.59946	0.945104	1177.52	27.9765	1175.65	19.156	1173.09	17.7967			11.1446	0.783609	3.03146	2.8916	0.245135	2.7834	0.962581	1413.34	35.3253	1415.57	22.0814	1419.76	14.9773			13.0182	1.26116	2.0222	3.25082	0.191013	2.99621	0.92168	1126.86	30.977	1123	22.0898	1116.43	25.1878			12.7503	0.916313	2.0958	2.46881
	12.6491	0.915221	2.10519	2.84607	0.193214	2.6949	0.946885	1138.76	28.1308	1150.51	19.5944	1173.59	18.1298			11.1338	1.07502	3.11546	3.01031	0.251684	2.81181	0.934061	1447.15	36.4477	1436.51	23.143	1421.61	20.5422			12.9895	1.0454	1.9358	3.88769	0.182448	3.7445	0.963168	1080.33	37.2455	1093.55	26.0346	1120.83	20.8502			12.7413	1.09584	2.15816	2.79957
	12.6206	1.07862	2.07676	2.76016	0.190174	2.54068	0.920484	1122.32	26.1705	1141.17	18.9194	1178.05	21.3385			11.0514	1.04672	3.147	2.63727	0.252349	2.42066	0.917864	1450.58	31.4435	1444.27	20.3238	1435.79	19.9631			12.9789	1.24179	1.93573	3.16067	0.182294	2.90651	0.919586	1079.49	28.8895	1093.52	21.1642	1122.43	24.7636			12.7394	0.774222	2.15062	2.17883
	12.5915	1.05099	2.22303	2.9544	0.2031	2.76114	0.934586	1191.95	30.0482	1188.32	20.6938	1182.6	20.7721			11.0225	1.07703	3.05152	2.72895	0.244054	2.50743	0.918824	1407.74	31.7101	1420.62	20.873	1440.78	20.5273			12.8859	2.50571	1.73554	4.08033	0.162269	3.22033	0.789233	969.376	28.9835	1021.81	26.2914	1136.77	49.881			12.7229	1.21542	2.18686	3.54855
	12.5323	0.961111	2.10551	2.71598	0.19146	2.54024	0.935294	1129.28	26.3144	1150.61	18.6995	1191.88	18.9517			11.0022	0.979895	3.03674	3.19729	0.242423	3.04343	0.951878	1399.28	38.2817	1416.9	24.4271	1444.3	18.667			12.8775	1.38575	2.08757	3.61019	0.195056	3.33364	0.923398	1148.71	35.0762	1144.73	24.7896	1138.08	27.5677			12.7224	1.2651	2.08287	2.96668
	12.5143	1.45446	2.01459	3.0328	0.182929	2.66129	0.877501	1082.95	26.5299	1120.44	20.5822	1194.73	28.6957			10.9933	0.905224	3.05005	2.58724	0.243288	2.42371	0.936795	1403.77	30.574	1420.24	19.7865	1445.85	17.2409			12.8085	1.32202	2.0515	4.5494	0.190659	4.35308	0.956847	1124.94	44.9358	1132.79	31.0655	1148.75	26.2708			12.7127	1.06795	1.99814	3.01623
	12.492	0.961346	2.12356	2.6513	0.19248	2.47088	0.931947	1134.8	25.7103	1156.5	18.3042	1198.25	18.9486			10.9835	1.03816	3.03887	3.17737	0.24218	3.00298	0.945115	1398.02	37.7424	1417.44	24.2791	1447.55	19.7684			12.8051	1.18001	2.18976	3.34985	0.203454	3.13513	0.935903	1193.85	34.1676	1177.79	23.3545	1149.27	23.4479			12.7127	1.04651	2.14696	3.18458
	12.4888	0.841098	2.22437	2.93121	0.201565	2.80794	0.957947	1183.72	30.3653	1188.75	20.5351	1198.75	16.5837			10.9575	1.02063	3.03049	2.64617	0.240941	2.44142	0.922624	1391.59	30.5579	1415.33	20.205	1452.05	19.4227			12.772	1.49799	2.07988	4.11183	0.192746	3.82926	0.931277	1136.23	39.8911	1142.2	28.2021	1154.38	29.7409			12.6973	0.942042	2.15812	2.72033
	12.4561	1.01123	2.15308	2.32329	0.194593	2.09167	0.900306	1146.21	21.9645	1166.04	16.11	1203.91	19.9053			10.925	1.18249	3.31247	3.27127	0.262578	3.05007	0.932381	1503.02	40.8917	1483.99	25.519	1457.71	22.4861			12.7536	1.14082	2.13477	3.90384	0.197546	3.73343	0.956348	1162.13	39.7016	1160.13	27.0003	1157.25	22.6494			12.6898	0.997521	2.15994	3.47818
	12.4511	0.642585	1.94512	2.92772	0.175728	2.85633	0.975616	1043.59	27.5209	1096.77	19.6361	1204.7	12.6585			10.8343	0.964466	3.04413	2.61952	0.239306	2.4355	0.929753	1383.09	30.3169	1418.76	20.0238	1473.53	18.301			12.7379	1.71023	1.77417	3.47448	0.163976	3.02442	0.870467	978.837	27.4663	1036.05	22.566	1159.69	33.913			12.6594	1.12503	2.12671	3.40881
	12.4481	0.802597	2.27273	2.55677	0.205276	2.42753	0.949453	1203.6	26.6524	1203.86	18.0304	1205.17	15.7985			10.8221	0.847507	3.29766	2.31597	0.258944	2.15534	0.930639	1484.44	28.5782	1480.5	18.0461	1475.67	16.0769			12.7271	1.1561	2.17812	3.80768	0.20114	3.62793	0.952792	1181.44	39.164	1174.08	26.5033	1161.36	22.9195			12.6417	0.952782	2.09034	2.83014
	12.3861	1.0246	2.29266	2.0624	0.206045	1.78988	0.867865	1207.71	19.7125	1210.03	14.5823	1215	20.1673			10.7136	1.02756	3.03633	2.7911	0.236033	2.59507	0.929764	1366.04	31.9458	1416.8	21.3222	1494.76	19.443			12.7158	1.16567	2.2363	3.474	0.206331	3.27259	0.942025	1209.24	36.0838	1192.5	24.3795	1163.12	23.1219			12.6354	1.18007	2.15621	3.49453
	12.3835	1.37029	2.15406	2.92101	0.193547	2.57965	0.883137	1140.56	26.9668	1166.36	20.2585	1215.46	26.9395			10.709	1.01488	3.32937	2.52992	0.2587	2.31744	0.916012	1483.19	30.7046	1487.96	19.7574	1495.58	19.2009			12.7022	1.4199	2.05987	4.43253	0.189849	4.19895	0.947304	1120.56	43.1898	1135.58	30.3073	1165.24	28.1252			12.6318	0.983925	2.16836	2.72216
	12.3477	1.02638	2.24013	2.73375	0.2007	2.53376	0.926844	1179.08	27.3023	1193.7	19.1934	1221.14	20.161			10.7072	0.74471	3.06047	3.06925	0.237768	2.97753	0.970117	1375.08	36.8717	1422.86	23.4937	1495.89	14.0887			12.695	1.26395	2.04805	3.58095	0.188651	3.35047	0.935637	1114.07	34.2795	1131.65	24.436	1166.37	25.0433			12.6052	1.24189	2.07937	3.42236
	11.8994	0.784664	2.63725	2.26812	0.227701	2.12807	0.938252	1322.44	25.4436	1311.09	16.6999	1293.41	15.2636			10.665	0.984317	3.38664	2.62698	0.26207	2.4356	0.927148	1500.42	32.6033	1501.31	20.596	1503.36	18.6018			12.6544	1.35447	2.14994	3.61931	0.197403	3.35631	0.927334	1161.35	35.6696	1165.03	25.0881	1172.76	26.7903			12.6051	1.08753	2.10644	3.46181
	11.4144	0.873537	2.75164	2.97468	0.227895	2.84353	0.955911	1323.46	34.0214	1342.53	22.1569	1373.89	16.8022			10.648	0.906029	3.3503	2.91626	0.258844	2.77195	0.950514	1483.92	36.7429	1492.86	22.8084	1506.38	17.1152			12.6221	1.54239	2.176	4.06964	0.199288	3.76604	0.925397	1171.49	40.3428	1173.4	28.319	1177.8	30.513			12.587	0.93202	2.07368	3.18912
	11.3328	0.814526	3.06543	2.02949	0.252067	1.85887	0.915927	1449.13	24.1245	1424.09	15.5395	1387.68	15.6364			10.4808	0.835106	3.35849	2.81873	0.255403	2.69218	0.955104	1466.28	35.3077	1494.77	22.0577	1536.22	15.7146			12.5901	1.10993	2.17517	3.38294	0.198706	3.19568	0.944644	1168.37	34.1495	1173.13	23.5358	1182.82	21.9363			12.5387	1.39742	2.17812	3.80399
	11.1945	0.853035	3.06363	2.90021	0.248845	2.77192	0.955766	1432.51	35.606	1423.65	22.205	1411.22	16.3232			10.4471	0.852249	3.44393	2.21101	0.261059	2.04016	0.922726	1495.26	27.2262	1514.48	17.4001	1542.27	16.0244			12.4528	1.50179	2.16805	3.16542	0.195895	2.78649	0.88029	1153.23	29.4245	1170.85	21.9992	1204.43	29.5881			12.5159	1.0461	2.15361	3.10064
	11.176	1.16593	2.84037	3.01928	0.23033	2.78508	0.922432	1336.23	33.6115	1366.27	22.6781	1414.38	22.3013			10.3865	1.18468	3.52405	2.73397	0.265582	2.46397	0.901241	1518.34	33.3323	1532.63	21.6274	1553.2	22.2415			12.2492	1.4981	2.14793	4.00304	0.190904	3.71214	0.927331	1126.27	38.3607	1164.38	27.741	1236.86	29.3595			12.5124	1.33152	2.00747	2.8988
	11.13	1.29957	2.99812	3.14538	0.242121	2.86436	0.910655	1397.71	35.993	1407.14	23.954	1422.27	24.8312			10.3534	0.857817	3.44259	2.62979	0.258618	2.48595	0.945303	1482.77	32.929	1514.18	20.6947	1559.19	16.0916			12.1377	1.14557	2.22935	3.71882	0.196336	3.53798	0.951372	1155.61	37.4305	1190.31	26.0732	1254.74	22.3876			12.4323	0.966849	2.19511	2.68034
	11.1277	1.05616	3.05732	2.6668	0.246851	2.44875	0.918233	1422.21	31.2525	1422.07	20.4071	1422.66	20.179			10.3325	1.09761	3.74071	2.54303	0.280445	2.29396	0.902058	1593.6	32.3887	1580.13	20.3774	1562.98	20.5802			11.9163	1.94196	2.33143	3.76816	0.201582	3.22922	0.856974	1183.81	34.9235	1221.91	26.7825	1290.65	37.7934			12.3327	0.922564	2.34485	2.83691
	11.1098	1.14417	3.0381	3.02207	0.244905	2.7971	0.925559	1412.15	35.4725	1417.25	23.0905	1425.73	21.8515			10.1073	1.06129	3.32744	2.94574	0.244025	2.74792	0.932844	1407.59	34.7481	1487.51	23.0027	1604.19	19.7925			11.8674	1.07626	2.48235	2.99703	0.213751	2.79712	0.933296	1248.77	31.7549	1266.9	21.6959	1298.64	20.9203			12.2042	1.15812	2.2406	3.63586
	11.0794	1.21612	3.02217	3.46054	0.242954	3.23981	0.936216	1402.03	40.8237	1413.23	26.4077	1430.96	23.2092			9.93039	0.822484	4.01775	2.65863	0.289492	2.52821	0.950944	1638.99	36.5893	1637.79	21.6186	1637.05	15.275			11.7741	1.3948	2.61276	3.30011	0.22321	2.99086	0.906292	1298.82	35.1829	1304.23	24.2382	1313.98	27.054			12.0853	0.883679	2.37304	2.46447
	11.0393	0.965094	3.05681	2.7228	0.244849	2.54602	0.935075	1411.85	32.2823	1421.94	20.8348	1437.89	18.401			9.91616	0.954318	3.89623	3.56371	0.280334	3.43356	0.963478	1593.05	48.4645	1612.9	28.8026	1639.71	17.7175			11.7733	1.01631	2.64622	3.20547	0.226053	3.04009	0.948407	1313.78	36.1336	1313.59	23.6256	1314.11	19.7123			12.0693	1.35054	2.47016	6.34661
	11.0171	0.907913	3.12032	2.40171	0.249432	2.22348	0.925794	1435.55	28.6151	1437.71	18.47	1441.73	17.3017			9.89848	1.139	4.06538	2.78196	0.291983	2.53811	0.912345	1651.43	36.9772	1647.39	22.6748	1643.02	21.1356			11.7393	1.47334	2.57139	3.77324	0.219027	3.4737	0.920615	1276.73	40.2347	1292.54	27.5919	1319.72	28.5551			12.0278	0.905601	2.3614	3.1837
	11.0119	0.77137	2.98284	3.05271	0.238331	2.95365	0.967549	1378.01	36.6459	1403.25	23.2182	1442.62	14.6978			9.89695	2.53892	4.20472	4.13561	0.301944	3.26453	0.78937	1700.94	48.8069	1674.94	33.9368	1643.31	47.118			11.703	1.25291	2.65714	3.25238	0.225631	3.00137	0.922822	1311.56	35.6189	1316.63	23.9986	1325.71	24.2618			11.9678	1.16173	2.35952	2.97628
	10.9903	1.06201	3.15819	2.81683	0.251846	2.60895	0.926204	1447.99	33.8355	1447	21.7265	1446.36	20.2258			9.86061	0.857531	3.9107	2.89485	0.279799	2.76492	0.955118	1590.35	38.9682	1615.9	23.4123	1650.13	15.8975			11.7011	1.36877	2.62735	4.42545	0.223066	4.20845	0.950966	1298.05	49.4803	1308.32	32.5585	1326.02	26.5051			11.7893	0.921394	2.64658	2.80602
	10.9853	1.06832	3.1168	2.29819	0.248431	2.03479	0.885388	1430.38	26.1025	1436.84	17.6689	1447.24	20.3435			9.84795	0.855774	4.00729	2.73702	0.286341	2.59979	0.949863	1623.22	37.3069	1635.68	22.2446	1652.52	15.8601			11.5926	1.33812	2.64322	4.0771	0.222332	3.85125	0.944606	1294.19	45.1586	1312.76	30.0438	1344.04	25.847			11.7418	1.03516	2.71357	2.77355
	10.9713	0.847237	3.01746	2.98747	0.240209	2.86482	0.958944	1387.78	35.7695	1412.04	22.7875	1449.65	16.1282			9.77095	0.927567	4.18515	2.72515	0.296712	2.56244	0.940291	1674.98	37.7979	1671.12	22.3378	1667.05	17.1589			11.4885	1.31424	2.62354	3.15635	0.218695	2.86973	0.909192	1274.98	33.1976	1307.26	23.2084	1361.44	25.323			11.7367	1.06465	2.46139	3.30495
	10.9593	1.0252	3.13442	3.06128	0.249245	2.8845	0.942256	1434.58	37.1	1441.18	23.5696	1451.74	19.5106			9.76724	0.929239	3.8674	2.97144	0.274081	2.82241	0.949844	1561.48	39.1404	1606.9	23.9773	1667.75	17.1884			11.4329	1.3009	2.73834	3.20172	0.227161	2.92552	0.913734	1319.6	34.9106	1338.93	23.8178	1370.78	25.0329			11.7147	1.28318	2.67364	3.18508
	10.9586	1.01172	3.05019	2.68647	0.242533	2.48869	0.926377	1399.85	31.3152	1420.28	20.5458	1451.86	19.2537			9.72333	0.900958	4.05983	2.53595	0.286425	2.37051	0.934762	1623.64	34.0243	1646.27	20.6634	1676.08	16.6475			11.4118	1.56892	2.69616	3.82166	0.223249	3.48477	0.911846	1299.02	40.9989	1327.4	28.3132	1374.33	30.1758			11.6996	0.922258	2.70113	2.47421
	10.9176	0.970613	3.10678	2.71546	0.246107	2.53606	0.933936	1418.37	32.2887	1434.37	20.8614	1459	18.4536			9.71826	0.714902	4.23325	2.77968	0.298504	2.68618	0.966361	1683.89	39.8075	1680.49	22.835	1677.04	13.2093			11.3349	1.20681	2.96976	3.79276	0.244246	3.59564	0.948028	1408.73	45.5013	1399.91	28.8177	1387.32	23.1699			11.5762	1.03292	2.64364	3.56865
	10.8912	0.815271	3.08707	2.9117	0.243955	2.79523	0.96	1407.23	35.3383	1429.48	22.3347	1463.59	15.4905			9.71784	1.10697	4.34391	2.43846	0.306294	2.17272	0.891021	1722.44	32.8415	1701.74	20.1291	1677.12	20.4519			11.2128	1.42683	3.00787	3.46255	0.244714	3.1549	0.91115	1411.16	39.9852	1409.61	26.3918	1408.1	27.3156			11.4284	0.79592	2.75383	2.95129
	10.8155	1.00469	3.07325	3.05563	0.241176	2.88573	0.944399	1392.81	36.1476	1426.05	23.4134	1476.83	19.0559			9.67516	0.865153	3.72975	2.56518	0.261834	2.41488	0.941409	1499.22	32.3029	1577.78	20.5423	1685.25	15.9689			11.1924	1.62833	3.01046	4.3938	0.244479	4.08093	0.928793	1409.94	51.6822	1410.27	33.5016	1411.58	31.1589			11.3078	1.15123	2.96949	3.20229
	10.7678	1.21198	3.35755	3.07491	0.262323	2.82598	0.919046	1501.71	37.8581	1494.55	24.0616	1485.22	22.9619			9.63022	0.984999	4.07668	3.10376	0.284859	2.94332	0.948306	1615.79	42.0665	1649.65	25.3125	1693.84	18.1596			11.1696	1.20934	2.96251	3.15979	0.240097	2.91921	0.923861	1387.2	36.435	1398.06	23.9916	1415.47	23.1284			11.298	1.23489	2.91679	3.38132
	10.6717	0.823884	3.3437	2.18508	0.25891	2.0238	0.926193	1484.26	26.8314	1491.32	17.0807	1502.18	15.5735			9.62115	0.845268	4.35184	3.01588	0.3038	2.895	0.95992	1710.12	43.4861	1703.24	24.9058	1695.58	15.5797			11.1669	1.13827	3.18908	3.40144	0.258395	3.20533	0.942345	1481.63	42.4292	1454.52	26.2988	1415.94	21.7677			11.2222	1.13658	3.05199	3.10408
	10.6453	1.0258	3.25592	3.02643	0.251488	2.84729	0.940806	1446.15	36.8846	1470.59	23.5136	1506.86	19.3767			9.62064	1.04525	4.25973	3.11506	0.297354	2.93446	0.942023	1678.17	43.3578	1685.62	25.6216	1695.68	19.2661			11.1547	1.07104	3.06426	3.87407	0.24801	3.72308	0.961024	1428.21	47.6957	1423.8	29.6664	1418.04	20.4761			11.1939	1.08683	3.07965	3.24705
	10.6272	0.922071	3.32263	2.52605	0.256206	2.35175	0.930998	1470.4	30.9201	1486.38	19.7179	1510.07	17.4098			9.606	1.24576	4.22211	2.39571	0.29428	2.04633	0.854168	1662.88	29.9937	1678.33	19.6699	1698.48	22.9544			11.1391	1.04641	3.05369	3.92265	0.246809	3.78051	0.963763	1422	48.2433	1421.16	30.0131	1420.71	19.998			11.1789	1.04862	3.08888	3.40634
	10.6061	0.998344	3.49361	3.3964	0.268854	3.24636	0.955823	1534.98	44.3432	1525.77	26.8182	1513.83	18.8407			9.59937	0.925934	4.30175	2.63365	0.299623	2.46552	0.936159	1689.44	36.6428	1693.7	21.701	1699.75	17.0577			11.1234	1.35884	2.76637	3.57974	0.223273	3.31181	0.925154	1299.15	38.9674	1346.51	26.7035	1423.4	25.9599			11.1449	1.15051	2.99501	3.41434
	10.4792	1.15817	3.3758	2.94918	0.256681	2.71225	0.919663	1472.84	35.7126	1498.8	23.106	1536.49	21.7918			9.59185	0.743573	4.11603	2.54381	0.286463	2.43271	0.956325	1623.83	34.9208	1657.49	20.7836	1701.2	13.6953			11.1122	1.57539	2.96334	4.21324	0.238929	3.90762	0.927463	1381.12	48.5804	1398.27	31.997	1425.33	30.0895			11.1409	0.972729	3.0921	3.00595
	10.1905	1.05997	3.65623	2.48224	0.270345	2.24454	0.904241	1542.56	30.7926	1561.87	19.7938	1588.88	19.8073			9.58211	0.868257	4.22703	2.73909	0.29389	2.59784	0.94843	1660.94	38.0384	1679.28	22.4951	1703.07	15.9884			11.0822	0.994961	3.0092	3.06546	0.241972	2.8995	0.945861	1396.94	36.4166	1409.95	23.3666	1430.48	18.9895			11.1281	1.18056	3.12999	2.95434
	10.1807	0.911574	3.47936	2.51879	0.257018	2.34805	0.932214	1474.57	30.9494	1522.55	19.8683	1590.68	17.0299			9.50511	1.04284	4.31635	2.83129	0.297688	2.63224	0.929696	1679.84	38.926	1696.49	23.345	1717.91	19.1679			11.0477	1.30483	2.99102	2.96942	0.239761	2.66737	0.89828	1385.45	33.2541	1405.34	22.6	1436.44	24.884			11.1217	0.890011	3.01528	2.71873
	9.9834	1.05619	4.08046	2.82826	0.295581	2.62365	0.927653	1669.36	38.587	1650.41	23.0691	1627.15	19.639			9.49939	0.892608	4.34376	2.77853	0.299398	2.63125	0.946994	1688.32	39.0834	1701.71	22.937	1719.02	16.4039			11.0334	1.15091	3.00005	3.98434	0.240174	3.8145	0.957372	1387.6	47.6219	1407.63	30.3514	1438.9	21.9412			11.1079	1.00996	3.09175	2.81497
	9.9311	0.938025	4.05455	3.08218	0.292165	2.93597	0.952564	1652.34	42.7944	1645.21	25.1094	1636.92	17.4196			9.49581	1.02528	4.13398	3.43395	0.284832	3.27731	0.954387	1615.65	46.8367	1661.05	28.0833	1719.71	18.8408			11.019	1.24607	2.98978	3.4059	0.239039	3.16977	0.930671	1381.7	39.4217	1405.02	25.9207	1441.4	23.7474			11.0851	0.737639	3.0657	3.38391
	9.92033	0.898971	3.90873	2.08112	0.281352	1.87695	0.901891	1598.17	26.5677	1615.49	16.8281	1638.93	16.6916			9.49284	0.948466	4.35541	3.20301	0.299994	3.05936	0.955152	1691.28	45.5121	1703.92	26.4559	1720.28	17.4278			11.016	1.4688	3.04251	3.25833	0.243188	2.9085	0.892634	1403.25	36.6773	1418.35	24.9054	1441.92	27.9905			11.0783	1.05009	3.12649	3.04865
	9.91604	0.686685	3.98538	2.36673	0.286745	2.26492	0.956984	1625.24	32.5371	1631.22	19.2133	1639.73	12.7485			9.47029	1.07815	4.49878	2.9529	0.309133	2.74904	0.930962	1736.44	41.8472	1730.75	24.5353	1724.65	19.8002			10.9872	1.09931	3.02327	3.36315	0.241019	3.17841	0.945069	1391.99	39.7931	1413.51	25.6665	1446.9	20.9348			11.0641	1.19055	3.23366	3.36579
	9.90756	1.1192	4.02768	3.2077	0.289541	3.00612	0.937156	1639.23	43.5117	1639.8	26.098	1641.32	20.7745			9.46471	0.884612	4.23777	2.73307	0.291027	2.58595	0.94617	1646.66	37.5785	1681.37	22.4565	1725.74	16.2431			10.9716	1.2802	3.00958	4.22651	0.239587	4.02796	0.953023	1384.55	50.1879	1410.05	32.2229	1449.6	24.3708			11.0308	1.07991	3.28407	3.23003
	9.83898	0.666573	4.11409	2.16196	0.293705	2.05664	0.951283	1660.02	30.0992	1657.1	17.6615	1654.2	12.3505			9.43505	1.06991	4.3655	2.52762	0.298858	2.29002	0.905996	1685.65	33.9676	1705.83	20.8846	1731.5	19.6319			10.9627	1.42357	3.04744	3.6659	0.242404	3.3782	0.921521	1399.18	42.49	1419.59	28.0334	1451.15	27.0948			11.015	1.13544	3.07371	3.21412
	9.81729	0.869178	4.16602	2.19758	0.296757	2.01839	0.918459	1675.21	29.7761	1667.36	17.9964	1658.29	16.0967			9.42357	0.927489	3.82271	3.99591	0.261381	3.88678	0.97269	1496.9	51.9213	1597.54	32.1715	1733.73	17.0135			10.9567	1.57558	2.98462	3.81133	0.237278	3.47042	0.910553	1372.53	42.9039	1403.71	28.9952	1452.18	29.984			10.9983	0.894281	2.96989	2.88054
	9.80412	1.02275	3.94725	2.39301	0.280796	2.16344	0.904067	1595.37	30.5757	1623.43	19.3891	1660.78	18.9352			9.41301	1.06862	4.39165	3.61388	0.299946	3.45227	0.955282	1691.04	51.3512	1710.77	29.8975	1735.79	19.5977			10.9481	1.06261	2.93028	3.21885	0.232775	3.03839	0.943938	1349.03	36.9844	1389.77	24.3725	1453.68	20.2173			10.9491	0.748114	2.552	5.62783
	9.75665	0.939546	4.14887	2.18331	0.293709	1.97081	0.902671	1660.04	28.8434	1663.99	17.8652	1669.76	17.3746			9.3817	1.10782	4.51983	3.05433	0.307674	2.84634	0.931904	1729.25	43.1721	1734.63	25.3999	1741.9	20.3013			10.9282	1.25216	3.08924	3.36426	0.244956	3.12255	0.928154	1412.41	39.6066	1430.02	25.812	1457.15	23.8128			10.7376	0.982957	3.17992	2.71928
	9.71656	0.841087	4.12422	3.24447	0.290765	3.13355	0.965814	1645.35	45.5048	1659.11	26.5208	1677.37	15.5386			9.35224	0.897111	4.44722	1.89977	0.301781	1.67461	0.88148	1700.13	25.0258	1721.18	15.75	1747.65	16.4276			10.9279	1.29987	2.97989	3.59869	0.236278	3.35573	0.932486	1367.32	41.3446	1402.5	27.3658	1457.2	24.7199			10.4766	1.33297	2.99268	2.92523
	9.71025	0.7512	4.16234	2.35444	0.293262	2.23139	0.947736	1657.81	32.6187	1666.64	19.278	1678.57	13.8773			9.31106	1.18808	4.50726	2.75055	0.304509	2.48072	0.901902	1713.63	37.3297	1732.31	22.8612	1755.73	21.7347			10.8932	1.22593	3.0215	3.24729	0.238817	3.00699	0.926	1380.54	37.3691	1413.06	24.7783	1463.24	23.2948			10.2872	0.795557	3.44103	2.27982
	9.69948	0.90364	4.06075	2.25933	0.285787	2.07075	0.916533	1620.44	29.6703	1646.46	18.4098	1680.62	16.6891			9.30487	0.684514	4.87992	2.16586	0.329466	2.05485	0.948744	1835.79	32.8273	1798.8	18.2536	1756.95	12.5214			10.7779	1.20434	3.03087	3.54844	0.237023	3.33782	0.940642	1371.2	41.2287	1415.43	27.0981	1483.43	22.8226			10.0848	0.93092	3.8205	3.86308
	9.65899	0.826917	4.01594	3.12043	0.281454	3.00887	0.964248	1598.68	42.6022	1637.43	25.3729	1688.34	15.2554			9.21727	1.18739	3.87251	3.11208	0.25899	2.87665	0.924352	1484.67	38.148	1607.97	25.1194	1774.23	21.6722			10.7442	1.40867	3.2059	3.61574	0.249927	3.33005	0.920987	1438.1	42.9244	1458.59	27.9916	1489.36	26.6738			10.0406	1.01063	3.95943	2.80151
	9.65109	1.04072	4.03693	2.46603	0.282693	2.23566	0.906586	1604.91	31.763	1641.67	20.071	1689.85	19.1966			9.20332	1.05553	4.47697	3.27038	0.298962	3.09536	0.946483	1686.16	45.9258	1726.71	27.1504	1777	19.2587			10.1734	1.2217	3.8287	3.76518	0.282621	3.56146	0.945895	1604.55	50.5896	1598.8	30.3225	1592.03	22.8206			9.96126	1.04104	3.9036	2.97923
	9.65096	1.08305	4.26176	2.5217	0.298433	2.27728	0.903071	1683.53	33.7416	1686.01	20.7416	1689.87	19.9775			9.19368	0.989377	4.79968	2.33616	0.320176	2.11632	0.905894	1790.59	33.0872	1784.84	19.6334	1778.91	18.0472			10.1654	1.09933	3.5711	3.45701	0.263398	3.27756	0.94809	1507.2	44.0502	1543.13	27.4295	1593.5	20.5306			9.91365	0.819412	4.10629	2.77911
	9.63608	0.817232	4.23054	2.71147	0.29579	2.58538	0.953498	1670.4	38.0449	1679.97	22.2717	1692.72	15.0683			9.18824	1.09178	4.69402	3.36145	0.312943	3.17921	0.945785	1755.17	48.85	1766.17	28.1445	1779.98	19.9127			10.1081	0.94953	3.80557	3.0698	0.279112	2.91926	0.95096	1586.89	41.0646	1593.92	24.6889	1604.03	17.7083			9.87843	1.06717	4.17523	2.32049
	9.62042	0.803421	4.23655	2.48519	0.295729	2.35174	0.946302	1670.1	34.6013	1681.13	20.4181	1695.72	14.808			9.13878	0.962099	4.92005	3.10191	0.326246	2.94893	0.950683	1820.16	46.7641	1805.7	26.1818	1789.82	17.526			10.1063	1.16766	3.73581	3.50015	0.273946	3.29964	0.942714	1560.8	45.7411	1579.08	28.0426	1604.37	21.7759			9.86542	1.29998	4.19858	3.42966
	9.61533	0.986924	4.18241	2.40121	0.291795	2.18902	0.911631	1650.49	31.8754	1670.58	19.6793	1696.69	18.1885			9.02982	1.03234	4.86357	2.972	0.318656	2.78694	0.937733	1783.16	43.4153	1795.97	25.0357	1811.65	18.7553			10.0768	1.27673	3.89505	3.19098	0.28479	2.92443	0.916468	1615.44	41.7886	1612.66	25.7871	1609.82	23.7936			9.7475	0.985023	4.33816	3.03618
	9.5822	0.825257	4.20834	2.77004	0.292593	2.64425	0.95459	1654.47	38.5859	1675.65	22.73	1703.05	15.1965			8.89794	1.00731	4.86697	2.96678	0.314221	2.79055	0.940596	1761.45	43.0111	1796.56	24.9947	1838.33	18.241			9.96588	1.6989	3.87438	3.9393	0.28016	3.55413	0.902224	1592.17	50.1421	1608.36	31.8034	1630.42	31.5786			9.71254	1.07954	4.0747	3.16163
	9.57911	0.812701	4.35479	2.52715	0.302678	2.39291	0.94688	1704.57	35.842	1703.8	20.8712	1703.64	14.9641			8.88581	0.904544	4.60543	3.11242	0.296931	2.97808	0.956837	1676.07	43.9542	1750.25	25.9708	1840.8	16.3749			9.95264	1.30298	3.94632	3.69424	0.284983	3.45682	0.935734	1616.41	49.4226	1623.24	29.9358	1632.89	24.2106			9.70038	1.06548	4.23511	2.93218
	9.57707	1.04492	4.30023	2.44729	0.298821	2.213	0.904265	1685.46	32.822	1693.4	20.1637	1704.04	19.2397			8.87401	0.803014	5.13267	2.22243	0.330485	2.07229	0.932441	1840.73	33.1828	1841.53	18.8887	1843.21	14.5323			9.94519	1.50038	3.90107	4.74562	0.281504	4.5022	0.948706	1598.93	63.7561	1613.9	38.3727	1634.28	27.8741			9.69298	0.839578	4.32959	2.68324
	9.57126	0.907203	4.2033	2.60045	0.291909	2.43707	0.937173	1651.06	35.4982	1674.66	21.3331	1705.15	16.7012			8.78447	1.01617	5.11111	3.02715	0.325775	2.8515	0.941974	1817.87	45.1697	1837.95	25.713	1861.54	18.3499			9.92726	1.52777	3.59005	3.55563	0.258593	3.21067	0.902982	1482.64	42.5257	1547.33	28.245	1637.63	28.3692			9.68842	1.18749	4.27412	3.13217
	9.56987	1.01878	4.24014	2.58362	0.294424	2.37428	0.918972	1663.6	34.8138	1681.83	21.2305	1705.42	18.7551			8.71124	0.930107	5.27902	2.7782	0.333673	2.61788	0.942294	1856.16	42.2228	1865.48	23.7211	1876.64	16.7649			9.85883	1.16961	3.94257	3.51105	0.282028	3.31051	0.942883	1601.57	46.9478	1622.47	28.445	1650.47	21.6831			9.6718	0.917684	4.15696	2.91087
	9.56649	0.872219	4.35804	2.62989	0.302505	2.48104	0.9434	1703.72	37.1458	1704.42	21.723	1706.07	16.0553			8.70192	1.06169	5.38223	2.60264	0.339832	2.37624	0.913014	1885.86	38.8534	1882.03	22.2896	1878.57	19.1326			9.77836	1.13449	4.12075	4.07908	0.292368	3.91814	0.960545	1653.35	57.1417	1658.43	33.3419	1665.64	20.9912			9.62833	1.06001	4.29833	3.10981
	9.52514	0.925881	4.38833	2.47116	0.30329	2.29115	0.927156	1707.6	34.3711	1710.14	20.4378	1714.04	17.0261			8.61353	0.995237	5.25162	3.26825	0.328218	3.11303	0.952507	1829.74	49.591	1861.04	27.884	1896.95	17.8955			9.76777	1.27497	4.12946	3.97219	0.292669	3.76201	0.947088	1654.85	54.9083	1660.15	32.481	1667.65	23.5848			9.6203	1.15351	4.40401	3.03253
	9.52442	0.710302	4.53726	2.45635	0.313559	2.35141	0.957278	1758.2	36.1845	1737.83	20.4399	1714.18	13.0611			8.52175	0.918975	5.15009	2.91255	0.318443	2.76377	0.948918	1782.12	43.0324	1844.41	24.7698	1916.19	16.4861			9.7637	1.31824	4.00221	3.75302	0.283532	3.51389	0.936282	1609.12	50.0391	1634.64	30.4986	1668.42	24.383			9.61965	0.883616	4.28393	3.17845
	9.47193	1.2066	4.24898	2.96019	0.292019	2.70311	0.913156	1651.61	39.3849	1683.54	24.3356	1724.34	22.1587			8.34175	0.8649	5.60598	3.15023	0.33931	3.02918	0.961572	1883.35	49.4728	1917.02	27.1513	1954.4	15.446			9.736	1.238	4.19128	3.50695	0.296084	3.28117	0.935618	1671.86	48.3211	1672.32	28.7573	1673.67	22.8833			9.55718	1.15641	4.28703	3.55425
	9.46449	1.03816	4.47969	2.18424	0.307633	1.92175	0.879827	1729.05	29.1451	1727.22	18.1329	1725.78	19.0628			8.11914	1.13135	6.22683	2.71765	0.36683	2.47097	0.909229	2014.47	42.7505	2008.23	23.7806	2002.57	20.0921			9.73158	1.15214	4.18065	3.4579	0.295199	3.26031	0.942859	1667.46	47.9031	1670.23	28.3409	1674.51	21.2937			9.55237	0.943388	4.298	3.05127
	9.46385	1.04943	4.44902	2.98621	0.305506	2.79574	0.936217	1718.55	42.1757	1721.52	24.7618	1725.9	19.2695			7.77775	1.15028	6.92169	2.84141	0.39062	2.59817	0.914394	2125.7	47.0478	2101.44	25.2144	2078.52	20.2512			9.67969	0.991925	4.24648	3.40071	0.298249	3.25283	0.956516	1682.62	48.1736	1683.06	27.9557	1684.39	18.3109			9.5215	1.00304	4.4815	2.68357
	9.41571	1.95785	4.18853	3.46449	0.286155	2.85824	0.82501	1622.29	40.995	1671.78	28.4053	1735.26	35.9101			7.70459	0.867997	6.79841	2.59605	0.380053	2.44665	0.942448	2076.53	43.4355	2085.52	22.9837	2095.15	15.2543			9.65878	0.828088	4.46705	3.45081	0.313062	3.34998	0.970781	1755.76	51.4891	1724.87	28.6374	1688.38	15.2769			9.48412	0.87633	4.43763	2.7474
	9.40166	0.882278	4.41051	2.6671	0.300872	2.51694	0.943701	1695.63	37.527	1714.32	22.0795	1738	16.1754			7.66467	0.893322	6.54733	2.752	0.364121	2.60298	0.945849	2001.68	44.7907	2052.29	24.2456	2104.27	15.681			9.55093	1.14381	4.3904	3.11182	0.304255	2.89398	0.929996	1712.37	43.5207	1710.53	25.7407	1709.07	21.0475			9.43141	1.14798	4.34463	3.64639
	9.38071	1.09371	4.62966	2.8803	0.315118	2.66457	0.925102	1765.84	41.1585	1754.63	24.0556	1742.09	20.0421			7.66361	1.00364	6.77011	2.932	0.376458	2.75487	0.939589	2059.72	48.5715	2081.82	25.9452	2104.51	17.6173			9.51072	1.34323	4.12123	3.29908	0.284399	3.01325	0.91336	1613.48	43.0118	1658.52	26.9636	1716.83	24.6934			9.4216	0.759002	4.51477	3.36797
	9.36343	0.867032	4.46863	2.97577	0.303597	2.84666	0.956612	1709.12	42.738	1725.16	24.6951	1745.47	15.881			7.56197	1.06167	6.94411	2.8402	0.381013	2.63432	0.92751	2081.01	46.8528	2104.31	25.2139	2127.91	18.5874			9.42172	1.41497	4.27499	3.80556	0.292249	3.53272	0.928306	1652.76	51.5044	1688.56	31.3256	1734.09	25.9563			9.38317	0.790024	4.64008	2.62726
	9.35392	0.751325	4.09545	2.73576	0.27796	2.63056	0.961549	1581.08	36.884	1653.4	22.3304	1747.33	13.7582			6.23187	1.06797	10.2198	2.67212	0.462114	2.44942	0.916658	2448.89	49.9066	2454.87	24.7189	2460.56	18.0485			9.36977	1.23709	4.55578	3.0081	0.309727	2.74195	0.911521	1739.37	41.8006	1741.22	25.0512	1744.22	22.6639			9.17662	0.861528	4.26933	3.41914
	9.34358	0.789412	4.45713	2.5951	0.302173	2.47212	0.95261	1702.08	36.981	1723.03	21.5248	1749.35	14.4521			6.07598	0.69561	10.8181	2.33634	0.476931	2.23038	0.954649	2513.88	46.4302	2507.62	21.7188	2503.28	11.7041			9.30684	1.4524	4.69776	3.46844	0.317235	3.14969	0.908102	1776.21	48.9004	1766.84	29.0448	1756.56	26.5666			9.0974	0.936687	4.83915	3.09389
	9.30378	0.720964	4.22325	2.78262	0.285098	2.6876	0.965852	1616.99	38.4367	1678.55	22.8488	1757.16	13.1878			5.91772	0.824009	10.4637	2.56589	0.449291	2.42998	0.947032	2392.1	48.5625	2476.71	23.7852	2547.59	13.8045			9.28591	1.28174	4.63552	4.21719	0.312328	4.01769	0.952693	1752.15	61.6419	1755.69	35.2364	1760.68	23.4323			9.07979	1.07756	4.85955	3.36245
	9.23618	1.0969	4.86362	2.7301	0.325941	2.50005	0.915736	1818.68	39.6175	1795.98	22.9972	1770.49	20.0297			5.89244	0.861876	11.0111	2.44126	0.470775	2.28406	0.935606	2486.96	47.1304	2524.07	22.7282	2554.76	14.429			9.28269	1.10732	4.57318	3.28667	0.308021	3.09452	0.941536	1730.96	46.9769	1744.39	27.3909	1761.31	20.2413			9.07724	1.06315	4.91028	2.44013
	9.22365	0.827369	4.62274	2.84672	0.309378	2.72383	0.956833	1737.65	41.4887	1753.38	23.7687	1772.97	15.1027			5.70661	1.0043	11.2933	5.12855	0.467611	5.02926	0.980639	2473.08	103.308	2547.65	47.8739	2608.27	16.7268			9.25486	1.19503	4.56119	4.06691	0.306292	3.88737	0.955854	1722.44	58.76	1742.21	33.8818	1766.8	21.8319			9.05593	0.792507	4.99737	2.8624
	9.07569	1.14205	4.59668	2.74062	0.302699	2.49133	0.909038	1704.68	37.3182	1748.67	22.8595	1802.43	20.7724			5.62355	1.00268	12.0964	3.02823	0.493576	2.85741	0.943591	2586.13	60.8739	2611.91	28.4077	2632.66	16.6606			9.15724	1.3503	4.63691	3.53723	0.308092	3.26936	0.92427	1731.31	49.6399	1755.94	29.5531	1786.15	24.61			9.04922	0.92547	4.93283	2.86891
	9.06129	1.03848	4.57638	3.30349	0.300885	3.13602	0.949304	1695.69	46.759	1744.98	27.5346	1805.32	18.8816			5.54555	0.861314	12.4424	2.77683	0.500654	2.63987	0.950678	2616.61	56.7766	2638.39	26.1037	2655.85	14.2797			9.01066	1.28753	4.83879	3.79457	0.31636	3.56946	0.940675	1771.93	55.3017	1791.67	31.9411	1815.5	23.3814			9.03762	1.02687	4.97734	3.19483
	9.05394	0.911623	4.7027	2.98842	0.308939	2.84598	0.952336	1735.48	43.3022	1767.72	25.028	1806.8	16.5717			5.54299	0.912847	11.4302	2.8059	0.459711	2.65326	0.9456	2438.28	53.8674	2558.89	26.2044	2656.61	15.1332			8.97638	0.916054	4.90855	3.56997	0.3197	3.45044	0.966518	1788.26	53.8853	1803.73	30.1227	1822.42	16.6205			9.03124	1.45957	4.93487	4.0424
	8.95637	0.689057	3.95962	2.72264	0.25732	2.63401	0.967444	1476.11	34.7509	1625.96	22.0747	1826.47	12.4952			5.5341	0.878215	12.2892	1.84108	0.493466	1.61812	0.878898	2585.66	34.4664	2626.74	17.289	2659.27	14.5584			8.97332	1.39909	4.89981	3.3084	0.319021	2.99801	0.906181	1784.95	46.7441	1802.22	27.9061	1823.04	25.3843			8.80506	0.893827	5.30306	2.54421
	8.8279	1.03449	4.32871	2.44921	0.277271	2.22001	0.90642	1577.6	31.0669	1698.85	20.2045	1852.63	18.7009			5.46498	1.00235	12.169	2.20888	0.48254	1.96836	0.891113	2538.32	41.3005	2617.52	20.7283	2680.08	16.5801			8.93606	1.33233	5.01891	4.00863	0.325419	3.78074	0.943151	1816.14	59.8409	1822.52	33.9531	1830.59	24.1486			8.78202	1.00368	5.26468	3.40447
	8.82392	1.27488	4.94562	3.11189	0.316643	2.83876	0.912229	1773.31	44.0104	1810.08	26.2891	1853.44	23.045			5.45533	1.2423	13.0096	2.84866	0.514961	2.5635	0.899899	2677.77	56.1741	2680.35	26.8664	2683.01	20.5447			8.87933	1.07042	4.96472	3.45812	0.319862	3.28828	0.950887	1789.06	51.3725	1813.33	29.2344	1842.12	19.3752			8.78116	1.10371	5.22672	2.89677
	8.57887	0.783103	5.28242	3.40594	0.328814	3.31469	0.973209	1832.63	52.8758	1866.03	29.0865	1904.19	14.0684			5.44485	0.860992	12.5768	2.78294	0.496873	2.6464	0.950938	2600.34	56.6298	2648.49	26.182	2686.19	14.2332			8.82701	1.54257	4.74332	3.78018	0.303797	3.45112	0.912952	1710.11	51.8396	1774.93	31.7105	1852.81	27.8869			8.74251	0.865692	5.34872	3.21539
	8.54108	0.988872	5.51618	2.7635	0.341853	2.58052	0.933786	1895.58	42.3805	1903.12	23.7582	1912.12	17.7489			5.39252	0.746868	13.345	2.31571	0.522154	2.19196	0.946562	2708.31	48.4729	2704.37	21.8775	2702.14	12.3312			8.81274	1.45931	5.07213	4.24804	0.324331	3.98952	0.939144	1810.85	62.9861	1831.46	36.0454	1855.73	26.372			8.68046	1.00902	5.34428	2.96917
	8.41096	0.919337	5.71212	2.85411	0.348603	2.702	0.946702	1927.92	45.0253	1933.2	24.6674	1939.63	16.447			5.38728	0.925358	13.3224	2.72344	0.520763	2.56141	0.940506	2702.41	56.5441	2702.77	25.7281	2703.74	15.2759			8.74615	1.22591	5.24979	3.77275	0.333155	3.56802	0.945736	1853.66	57.4809	1860.74	32.1892	1869.43	22.1149			8.67403	1.09065	5.34811	3.5089
	8.31893	0.977495	5.6874	2.73364	0.343296	2.5529	0.933883	1902.51	42.0587	1929.46	23.6106	1959.29	17.4471			5.35448	1.04462	13.0889	3.67747	0.508519	3.52598	0.958807	2650.3	76.6258	2686.08	34.7035	2713.82	17.2284			8.74321	1.31372	4.88343	3.31545	0.309801	3.04407	0.918146	1739.73	46.415	1799.4	27.9497	1870.04	23.6977			8.62309	1.04759	5.41257	2.84724
	8.11928	1.01337	5.53623	2.99129	0.326151	2.81441	0.940868	1819.7	44.621	1906.24	25.7317	2002.54	17.9966			5.34298	1.0443	13.4799	3.0678	0.522586	2.88458	0.940279	2710.14	63.8251	2713.87	29.0065	2717.36	17.2173			8.57689	1.15041	5.52968	3.66867	0.344126	3.48363	0.949563	1906.49	57.4962	1905.22	31.5563	1904.61	20.6672			8.59536	1.18541	5.6274	2.62009
	7.93659	1.05569	6.00204	3.04043	0.345637	2.85127	0.937784	1913.73	47.2125	1976.14	26.469	2042.86	18.6614			5.13605	0.926523	14.0927	2.57767	0.525186	2.4054	0.933167	2721.14	53.3956	2755.97	24.4438	2782.28	15.181			8.56976	1.36529	5.23682	3.56367	0.32563	3.29177	0.923702	1817.16	52.1266	1858.63	30.3922	1906.1	24.5219			8.58804	0.770481	5.05682	2.75403
	7.82844	0.915737	6.65216	2.54288	0.377856	2.37227	0.932906	2066.26	41.9382	2066.29	22.4494	2067.08	16.1423			5.10753	0.771238	14.1568	2.94959	0.524643	2.84698	0.965211	2718.84	63.1556	2760.27	27.9807	2791.4	12.6257			8.50066	1.47401	5.31038	3.07277	0.327541	2.69615	0.877433	1826.45	42.8831	1870.53	26.2619	1920.63	26.4314			8.5026	0.942731	5.72772	3.06453
	7.64137	1.05744	6.96493	3.32058	0.386167	3.14771	0.94794	2105.03	56.5306	2106.97	29.4918	2109.61	18.5513			5.00521	0.928863	15.4409	3.03209	0.560768	2.88631	0.951921	2869.8	66.8531	2842.84	28.9226	2824.49	15.1611			8.29083	1.37143	5.64979	3.88939	0.339874	3.63958	0.935771	1886.06	59.5162	1923.73	33.5655	1965.33	24.4625			8.3915	0.818028	5.63155	3.20733
	7.58435	0.94786	6.13696	2.8286	0.337722	2.66506	0.942183	1875.7	43.3735	1995.52	24.7017	2122.74	16.6042																		7.7567	1.28566	6.33542	3.46288	0.356566	3.21537	0.928525	1965.88	54.4827	2023.37	30.3771	2083.29	22.623			8.34126	0.959133	5.79698	3.19871
	7.10869	0.87915	7.94515	3.05598	0.409807	2.92679	0.957726	2214.04	54.8454	2224.82	27.5677	2235.49	15.2105																		7.57754	1.18143	6.69446	3.23604	0.368071	3.01267	0.930974	2020.32	52.2519	2071.89	28.5954	2124.31	20.6929			8.33256	0.747169	5.84798	2.92291
	6.23998	1.00242	9.80881	2.51956	0.444107	2.31157	0.917448	2369	45.8269	2416.98	23.2204	2458.36	16.9442																		7.28829	1.51688	7.0304	3.74858	0.371786	3.42796	0.91447	2037.8	59.8926	2115.28	33.3346	2192.22	26.3707			8.24481	0.935293	6.22283	3.27057
	5.83403	1.08379	10.7465	3.15291	0.454909	2.96078	0.939064	2417.04	59.6796	2501.46	29.2968	2571.43	18.1187																		6.56084	1.22928	8.77755	3.95388	0.41785	3.75793	0.950441	2250.71	71.3962	2315.16	36.0562	2373.24	20.9616			8.00812	0.871867	6.60485	3.26761
	5.82708	1.03118	11.2485	2.95039	0.475592	2.76432	0.936934	2508.04	57.4363	2543.95	27.5187	2573.42	17.2356																		6.31292	1.27534	9.27944	3.51066	0.42505	3.27082	0.931681	2283.36	62.8923	2365.99	32.1897	2438.69	21.6016			7.88287	1.15788	6.83404	3.61329
	5.7808	0.861549	10.5479	2.45394	0.442425	2.29773	0.936343	2361.49	45.433	2484.14	22.763	2586.74	14.3784																		6.30541	1.19993	9.80476	4.06568	0.448578	3.88457	0.955455	2388.93	77.5494	2416.6	37.4785	2440.71	20.32			7.87338	1.10462	6.63849	3.2214
	5.67704	0.732339	12.1339	2.80952	0.499815	2.71239	0.96543	2613	58.2713	2614.81	26.3613	2616.92	12.1892																		6.2945	1.26771	10.1365	3.41483	0.462951	3.17081	0.928539	2452.58	64.6857	2447.3	31.5703	2443.64	21.4615			7.8242	0.852858	6.79547	2.56501
	5.59964	0.9582	12.2198	2.33751	0.496494	2.13209	0.91212	2598.71	45.6005	2621.43	21.9427	2639.74	15.9105																		6.19899	0.922267	10.3163	2.95169	0.464015	2.8039	0.949933	2457.26	57.29	2463.56	27.329	2469.49	15.5716			7.41186	1.05102	7.24036	2.94913
	5.4904	0.832313	11.7571	2.60051	0.468373	2.46372	0.947398	2476.42	50.661	2585.26	24.34	2672.41	13.78																		5.90929	1.24613	10.8971	3.28984	0.467236	3.0447	0.925486	2471.43	62.5046	2514.39	30.6059	2549.98	20.8735			5.94135	0.927651	10.4652	3.76813
	5.42331	0.862542	12.2764	2.4964	0.483086	2.34266	0.938414	2540.69	49.1918	2625.77	23.4429	2692.74	14.2502																		5.85096	1.35109	11.0922	3.6658	0.470903	3.40773	0.929601	2487.52	70.3312	2530.9	34.1566	2566.58	22.5953			5.54181	0.995026	12.4593	2.82012
	5.36024	0.959325	13.205	3.29543	0.513584	3.15271	0.95669	2671.91	68.9641	2694.42	31.1154	2712.05	15.8242																		5.69447	1.40631	11.8219	3.68809	0.48846	3.40945	0.924447	2564.01	72.1294	2590.4	34.5409	2611.82	23.416			5.52007	0.998958	12.4493	2.63232
	5.32129	0.934764	13.4836	2.9291	0.520607	2.77594	0.947711	2701.75	61.268	2714.13	27.695	2724.07	15.3983																		5.56868	1.05384	12.4699	3.77493	0.503851	3.62485	0.960242	2630.33	78.2937	2640.46	35.4988	2648.94	17.4838			5.50844	0.943385	12.8023	2.995
	5.31409	0.881376	13.256	2.41103	0.511128	2.24416	0.930788	2661.45	48.9339	2698.06	22.7678	2726.3	14.5156																		5.53407	1.38752	12.6562	3.89137	0.508201	3.63559	0.934271	2648.94	78.9752	2654.41	36.6348	2659.28	22.9986			5.49111	0.99701	12.9106	2.66157
	5.2928	0.930377	13.5819	2.74711	0.521594	2.58477	0.940904	2705.94	57.1195	2721	25.9865	2732.91	15.3136																		5.31066	1.20674	13.0302	3.56124	0.502096	3.35056	0.940839	2622.8	72.2008	2681.84	33.5952	2727.36	19.8739			5.47134	0.930554	12.5456	2.68734
	5.29191	1.04295	13.1257	2.79668	0.503991	2.59493	0.927861	2630.93	56.0574	2688.73	26.3926	2733.19	17.1666																		5.13462	1.47841	14.0899	3.46279	0.524932	3.13133	0.904279	2720.06	69.489	2755.77	32.8419	2782.74	24.2256			5.40705	1.02287	13.0458	3.12574
	5.11403	0.784614	14.3408	2.28584	0.532139	2.14697	0.939244	2750.46	48.0705	2772.52	21.7004	2789.32	12.8471																		5.10761	1.27144	14.0939	4.29959	0.522319	4.1073	0.955277	2709.01	90.8518	2756.04	40.7869	2791.37	20.817			5.37971	0.821345	13.1043	2.74777
	5.07209	0.905722	14.4404	2.70466	0.53144	2.5485	0.942263	2747.52	57.0124	2779.09	25.6896	2802.79	14.8161																		4.69629	1.03726	16.684	3.17097	0.568516	2.99653	0.944986	2901.73	70.0176	2916.85	30.3859	2928	16.7763			5.31642	0.966723	13.7573	3.20519
																															4.58285	1.26601	16.9952	3.71202	0.565131	3.48946	0.940043	2887.8	81.2265	2934.56	35.6113	2967.48	20.4072			5.31014	0.859426	13.5687	2.82487
																																														5.29504	1.25867	14.1009	2.94498
																																														5.24888	0.936352	13.9192	3.15426
																																														5.24194	1.10435	13.5679	3.60966
																																														5.19573	1.03495	14.2055	3.12921
																																														5.15747	1.03235	14.4754	3.06506
																																														5.04706	0.773275	14.4546	3.23003
																																														4.93812	0.788909	15.3262	2.40314
																																														4.88521	1.04943	15.2869	3.19868
																																														4.8772	0.921816	15.6092	2.96082
																																														4.58088	1.31678	17.9622	2.69525
																																														4.156	1.66017	18.1658	3.62985
[truncated: 35 more columns]

## Sheet: D.Pollock Bench, CO
	D.Pollock Bench, CO
						CO15-PB-1Jbb															CO15-PB-2Jw																CO15-PB-4Jw
				Isotope ratios						Apparent ages (Ma)									Isotope ratios						Apparent ages (Ma)									Isotope ratios						Apparent ages (Ma)									Isotope ratios
	206Pb*	±	207Pb*	±	206Pb*	±	error	206Pb*	±	207Pb*	±	206Pb*	±			206Pb*	±	207Pb*	±	206Pb*	±	error	206Pb*	±	207Pb*	±	206Pb*	±			206Pb*	±	207Pb*	±	206Pb*	±	error	206Pb*	±	207Pb*	±	206Pb*	±			206Pb*	±	207Pb*	±
	207Pb*	(%)	235U*	(%)	238U	(%)	corr.	238U*	(Ma)	235U	(Ma)	207Pb*	(Ma)			207Pb*	(%)	235U*	(%)	238U	(%)	corr.	238U*	(Ma)	235U	(Ma)	207Pb*	(Ma)			207Pb*	(%)	235U*	(%)	238U	(%)	corr.	238U*	(Ma)	235U	(Ma)	207Pb*	(Ma)			207Pb*	(%)	235U*	(%)
																19.6944	1.35549	0.176456	2.35757	0.0252155	1.92893	0.818187	160.534	3.05835	165.007	3.59052	230.646	31.3102
	20.4872	1.94627	0.231206	3.42213	0.0343692	2.81478	0.822523	217.836	6.02916	211.194	6.52531	138.739	45.7129			20.1844	1.97039	0.184716	3.81172	0.0270525	3.26294	0.856029	172.074	5.5404	172.11	6.03456	173.602	45.9699			9.07918	2.61517	0.355188	3.57558	0.0233988	2.43838	0.681953	149.101	3.59392	308.616	9.51588	1801.73	47.5777			21.4996	3.66668	0.154913	4.56023
	19.9266	1.21845	0.23864	3.83302	0.0345035	3.63421	0.948131	218.673	7.81374	217.306	7.49854	203.559	28.2782			20.1989	1.40977	0.203701	2.96252	0.0298545	2.60558	0.879517	189.637	4.86919	188.253	5.0906	171.92	32.9303			19.8754	1.02762	0.172058	2.46575	0.0248129	2.24141	0.909017	158.002	3.49843	161.203	3.67542	209.522	23.846			20.8897	1.23662	0.162012	3.08504
	19.1025	1.04141	0.250339	3.20831	0.0346981	3.03459	0.945853	219.885	6.56011	226.852	6.5225	300.718	23.7313			18.4684	1.58989	0.290809	2.5201	0.0389696	1.95529	0.775877	246.443	4.72772	259.196	5.76499	377.125	35.7635			20.6099	1.14191	0.169315	2.76302	0.0253197	2.51601	0.910602	161.189	4.00525	158.824	4.06237	124.701	26.875			8.16292	14.0357	0.461487	14.6171
	19.6756	1.37425	0.252046	3.72458	0.0359828	3.46178	0.929442	227.884	7.75105	228.237	7.61333	232.852	31.7238			18.6253	1.15296	0.381115	2.69297	0.0515045	2.43368	0.903715	323.752	7.68451	327.858	7.54564	358.07	26.0085			20.2204	1.08602	0.174363	2.27809	0.0255819	2.00256	0.879053	162.837	3.22007	163.199	3.43443	169.44	25.3853			20.2042	1.57003	0.254791	3.74312
	19.1758	1.28989	0.290187	3.75031	0.0403756	3.52151	0.938991	255.16	8.81001	258.706	8.5651	291.937	29.4641			18.7981	1.3672	0.377687	2.77394	0.051515	2.41361	0.870102	323.816	7.62261	325.335	7.72178	337.227	30.9543			20.1645	1.01688	0.180061	2.81848	0.0263449	2.62865	0.932647	167.631	4.34964	168.113	4.3668	175.894	23.7242			19.3826	1.8637	0.266756	3.69723
	19.2945	1.52985	0.297675	3.19955	0.0416737	2.8101	0.87828	263.199	7.24721	264.582	7.45251	277.866	35.0462			20.3037	4.0562	0.353212	4.96879	0.0520355	2.86986	0.577577	327.006	9.15057	307.134	13.1697	159.852	94.9248			20.0197	1.52612	0.187603	3.05036	0.0272511	2.64114	0.865847	173.321	4.51666	174.582	4.89274	192.731	35.4771			19.1196	1.12605	0.276723	3.21655
	19.426	1.22714	0.335907	3.8149	0.0473466	3.61214	0.946852	298.211	10.5265	294.065	9.74023	262.291	28.1558			18.4982	1.486	0.390402	2.43251	0.0523999	1.92585	0.791714	329.239	6.18146	334.663	6.93528	373.496	33.4309			22.3251	3.11162	0.170928	4.02103	0.0276882	2.54685	0.633383	176.063	4.42339	160.224	5.96012	NA	NA			20.0494	1.90183	0.274376	3.89581
	17.8317	1.44568	0.371298	2.92857	0.04804	2.54686	0.869663	302.477	7.52575	320.615	8.05165	455.546	32.081			18.502	1.43022	0.392357	3.38726	0.052673	3.07051	0.906487	330.911	9.90429	336.09	9.69221	373.038	32.1779			20.5612	1.10674	0.193233	2.70805	0.0288282	2.47157	0.912675	183.21	4.46442	179.384	4.45293	130.302	26.0166			19.478	1.24968	0.283362	3.84933
	18.8149	1.30288	0.352211	3.00815	0.048083	2.71136	0.901338	302.742	8.01865	306.383	7.95602	335.179	29.5202			18.8105	1.3831	0.404686	3.37186	0.0552341	3.07514	0.912001	346.576	10.3763	345.041	9.86399	335.712	31.3452			20.4877	0.946612	0.200385	2.42628	0.0297883	2.234	0.920751	189.223	4.16582	185.452	4.11262	138.708	22.2304			5.78529	27.2526	0.997997	27.942
	18.7483	1.20899	0.356925	3.75889	0.048554	3.55915	0.946864	305.638	10.6243	309.916	10.0398	343.226	27.3618			18.9791	1.22232	0.422123	2.80291	0.0581302	2.52235	0.899904	364.244	8.93277	357.568	8.44794	315.435	27.8087			11.2186	1.53896	0.375661	4.81745	0.0305791	4.56502	0.947601	194.171	8.73181	323.84	13.3585	1407.09	29.4665			19.7013	1.34184	0.296762	3.49984
	18.3684	0.986607	0.372836	2.61537	0.0496908	2.42215	0.926118	312.623	7.39151	321.753	7.21223	389.331	22.1479			18.5041	1.43202	0.440226	3.35812	0.0591061	3.03748	0.904519	370.187	10.9276	370.412	10.4228	372.776	32.2198			21.482	3.54229	0.22198	4.11841	0.0346	2.10083	0.510108	219.274	4.52912	203.556	7.59657	26.2315	84.9711			19.424	1.29301	0.33426	3.43418
	19.1703	1.18492	0.357548	2.72899	0.0497338	2.45832	0.900818	312.887	7.50809	310.382	7.29823	292.615	27.069			18.5392	1.2936	0.440239	2.31707	0.0592198	1.92235	0.829646	370.879	6.92838	370.421	7.19168	368.516	29.1245			19.8691	1.06647	0.26819	2.38937	0.0386642	2.13815	0.894863	244.548	5.13088	241.246	5.13068	210.255	24.743			19.2672	1.34805	0.343714	3.51817
	18.876	1.00858	0.390304	3.24089	0.0534565	3.07995	0.950343	335.708	10.075	334.591	9.23844	327.823	22.8889			17.3398	1.51473	0.474074	3.04706	0.0596456	2.6439	0.867687	373.47	9.59358	393.999	9.95065	517.253	33.2595			14.2519	2.72064	0.395766	4.81231	0.0409259	3.96943	0.82485	258.57	10.0606	338.573	13.856	933.213	55.8198			18.7435	1.46751	0.373749	3.0561
	18.6895	1.50819	0.400595	3.47839	0.0543238	3.13442	0.901111	341.013	10.411	342.079	10.1022	350.299	34.0914			19.4996	2.10807	0.430438	3.2032	0.0609009	2.41175	0.752919	381.102	8.92483	363.487	9.78743	253.569	48.4874			16.0561	2.43106	0.352654	3.07305	0.0410845	1.87978	0.611697	259.552	4.78208	306.716	8.13526	683.808	51.9144			19.06	1.39035	0.367638	3.78686
	18.6314	1.24231	0.40658	2.91685	0.054964	2.63907	0.904767	344.926	8.8636	346.409	8.56123	357.33	28.0308			16.1557	4.30076	0.521459	4.85612	0.0611271	2.25507	0.464378	382.477	8.37425	426.126	16.9013	670.57	92.0641			20.1616	1.38873	0.282659	3.11252	0.0413501	2.78553	0.894945	261.196	7.13028	252.765	6.96467	176.227	32.3907			15.6573	3.87605	0.455121	7.56103
	18.5862	1.034	0.431227	2.44962	0.0581547	2.22069	0.906546	364.394	7.86759	364.047	7.49433	362.803	23.2987			18.9595	1.71283	0.446986	3.09525	0.0614905	2.57814	0.832934	384.684	9.62758	375.167	9.70887	317.782	38.9198			19.7816	1.10077	0.302888	2.93441	0.0434743	2.72013	0.926974	274.332	7.30563	268.654	6.92681	220.443	25.4588			18.878	1.70702	0.381086	4.06405
	18.5072	1.37454	0.445206	3.79871	0.0597846	3.5413	0.932239	374.315	12.8781	373.917	11.8827	372.409	30.9328			17.8932	1.77386	0.47598	4.10478	0.0617967	3.7017	0.901804	386.543	13.8882	395.311	13.4417	447.864	39.4182			18.9863	0.748769	0.317278	2.63361	0.0437087	2.52492	0.958731	275.781	6.8164	279.807	6.44093	314.564	17.0371			18.8561	1.24742	0.383551	2.85998
	18.2285	1.21249	0.455898	3.0202	0.0602987	2.76613	0.915876	377.442	10.1408	381.401	9.60318	406.46	27.1374			18.3237	1.22406	0.467067	3.15131	0.0620984	2.90386	0.921479	388.374	10.9449	389.161	10.1874	394.794	27.4521			18.5937	1.04667	0.337197	2.25322	0.0454923	1.99536	0.88556	286.787	5.59702	295.046	5.76934	361.894	23.6101			18.8542	1.33905	0.392264	3.42271
	19.3455	1.12374	0.434848	3.08464	0.0610389	2.87267	0.931281	381.94	10.6532	366.613	9.49247	271.765	25.747			17.9701	1.14816	0.488271	2.90573	0.0636648	2.66927	0.918622	397.875	10.2993	403.732	9.68006	438.33	25.555			17.6573	1.12755	0.374311	2.49066	0.047956	2.22081	0.891656	301.961	6.55134	322.844	6.88808	477.286	24.9288			18.4442	1.09975	0.402841	2.08528
	17.485	2.07914	0.485607	3.65977	0.0616082	3.01182	0.822955	385.398	11.2674	401.913	12.1475	498.919	45.8067			17.6516	2.0325	0.504375	3.34105	0.0645989	2.65171	0.793676	403.534	10.3725	414.659	11.3744	477.993	44.931			12.2676	5.03881	0.551776	5.49508	0.0491148	2.19232	0.398961	309.084	6.61624	446.16	19.8424	1233.91	98.8915			18.217	1.68694	0.415419	4.64156
	23.7095	2.27997	0.370123	4.05238	0.0636731	3.35015	0.826712	397.925	12.928	319.745	11.1159	NA	NA			17.9857	1.10217	0.500039	3.09832	0.0652557	2.89565	0.934588	407.509	11.4348	411.729	10.4875	436.4	24.5396			18.6962	0.680456	0.382944	2.32377	0.0519487	2.22191	0.956166	326.475	7.07336	329.202	6.53371	349.504	15.3827			18.9307	1.23555	0.406427	2.58905
	18.0269	1.39096	0.492389	3.38891	0.0644048	3.0903	0.911886	402.358	12.054	406.537	11.3536	431.296	31.0182			18.1992	1.39696	0.494275	3.13437	0.0652692	2.80585	0.895187	407.591	11.0824	407.819	10.5277	410.066	31.2459			18.5271	0.896253	0.403121	2.54747	0.0541915	2.38461	0.936068	340.204	7.90219	343.909	7.4317	369.984	20.1795			19.4225	1.61111	0.404018	4.24946
	18.8479	1.3201	0.471867	3.66681	0.0645314	3.42093	0.932947	403.125	13.3683	392.478	11.9368	331.219	29.9188			18.0776	1.16211	0.499391	3.09918	0.0655041	2.87306	0.927036	409.012	11.3861	411.29	10.4814	425.044	25.9256			19.4521	1.15561	0.386271	2.50791	0.0545187	2.2258	0.887511	342.205	7.41814	331.642	7.09565	259.187	26.5521			17.9522	1.13447	0.445787	2.48692
	17.9359	1.33166	0.509757	3.2157	0.0663398	2.92701	0.910226	414.066	11.7388	418.286	11.025	442.566	29.6297			17.6774	1.32813	0.513116	2.98851	0.0658144	2.67717	0.895822	410.889	10.657	420.542	10.2906	474.791	29.3957			18.8515	1.10496	0.41749	3.22651	0.0571057	3.03141	0.939531	358	10.5566	354.254	9.64943	330.793	25.0548			18.6212	1.36693	0.433599	3.52858
	18.2351	1.21418	0.50364	3.89742	0.0666369	3.70346	0.950235	415.862	14.9151	414.163	13.2559	405.66	27.1796			17.5178	1.78928	0.521605	3.35452	0.0662991	2.83748	0.845867	413.82	11.3731	426.223	11.6767	494.795	39.456			16.2149	1.97862	0.486769	3.3499	0.0572696	2.70312	0.806927	358.999	9.43893	402.706	11.1367	662.726	42.4094			18.3636	0.862734	0.445156	2.99701
	19.2523	1.13901	0.485966	3.01217	0.0678856	2.78852	0.92575	423.404	11.4273	402.158	10.0028	282.867	26.0697			18.2438	1.00349	0.506728	2.90722	0.0670776	2.72854	0.938539	418.525	11.0568	416.247	9.928	404.59	22.4669			16.8861	1.52665	0.472632	2.76214	0.0579081	2.3019	0.833377	362.891	8.12263	393.005	9.00151	575.212	33.1811			17.447	1.19323	0.47079	2.35078
	18.7161	0.86897	0.501525	3.24726	0.0681078	3.12883	0.96353	424.746	12.8612	412.734	11.0135	347.106	19.6518			18.0291	1.23511	0.517548	2.82801	0.0677038	2.54404	0.899586	422.307	10.3993	423.512	9.79337	431.025	27.5262			18.802	1.14026	0.426561	2.92477	0.0581934	2.69334	0.920872	364.629	9.54813	360.732	8.88023	336.735	25.8287			18.3729	0.985973	0.447226	2.19486
	17.9421	0.967986	0.523197	3.00295	0.0681124	2.84266	0.946622	424.773	11.6857	427.285	10.4738	441.8	21.5532			17.9194	1.39631	0.527247	2.57236	0.0685527	2.1604	0.839852	427.43	8.93473	429.981	9.01733	444.62	31.0608			18.5848	1.63491	0.433635	2.87801	0.058475	2.36854	0.822979	366.344	8.43507	365.755	8.83931	362.978	36.8741			18.8015	1.29219	0.446913	3.21057
	17.7213	1.25584	0.531386	3.32782	0.0683273	3.08176	0.92606	426.071	12.706	432.729	11.7256	469.292	27.8127			18.1381	1.16859	0.524062	3.03396	0.0689704	2.79988	0.922846	429.95	11.6454	427.861	10.5934	417.579	26.1046			16.3905	1.71408	0.492184	2.73731	0.058534	2.13419	0.779669	366.704	7.60774	406.398	9.16792	639.64	36.889			18.6094	1.07035	0.462754	3.0084
	17.9196	1.31253	0.525962	2.80052	0.0683865	2.4739	0.883372	426.427	10.2081	429.126	9.80151	444.591	29.1824			18.0156	1.59951	0.536841	3.47177	0.0701749	3.08135	0.887547	437.209	13.0253	436.339	12.3145	432.7	35.652			18.3449	1.14892	0.444452	2.47981	0.05916	2.1976	0.886195	370.515	7.91286	373.387	7.74781	392.202	25.7791			17.8861	1.27056	0.486452	3.00553
	17.9847	1.2538	0.527651	2.67466	0.0688551	2.36258	0.88332	429.254	9.8112	430.249	9.38064	436.528	27.9297			17.0761	1.30317	0.582472	3.45014	0.0721692	3.19456	0.925922	449.211	13.8617	466.049	12.8952	550.813	28.4508			18.9448	1.19016	0.432094	3.08296	0.0593959	2.84397	0.92248	371.95	10.2788	364.662	9.44532	319.584	27.0478			18.4808	0.997243	0.474786	2.63701
	17.418	1.23527	0.548454	3.5509	0.0693147	3.32911	0.93754	432.025	13.9113	443.983	12.7712	507.373	27.1692			18.0326	1.34331	0.553204	3.21646	0.072382	2.92252	0.908614	450.49	12.7162	447.093	11.6328	430.6	29.9385			18.6591	0.898666	0.440516	2.82214	0.0596403	2.67523	0.947945	373.437	9.70645	370.616	8.76319	354	20.2833			18.3654	1.83856	0.488853	3.63463
	18.2924	1.38629	0.528183	3.28458	0.070104	2.97769	0.906568	436.782	12.5752	430.603	11.5275	398.628	31.0701			17.3167	1.0046	0.60587	2.40661	0.0761257	2.18691	0.908707	472.956	9.97281	480.952	9.21972	520.186	22.0556			18.682	1.17189	0.440862	2.72026	0.0597603	2.45489	0.902447	374.168	8.92391	370.86	8.45142	351.211	26.4633			17.7032	1.07091	0.507305	3.37562
	17.7874	1.27641	0.543434	3.35493	0.0701368	3.10264	0.924799	436.98	13.1086	440.686	11.9948	461.034	28.2997			17.6459	1.2178	0.611476	3.44354	0.0782907	3.22101	0.935379	485.912	15.076	484.491	13.2683	478.713	26.9378			18.3591	1.20228	0.450657	2.89332	0.0600325	2.6317	0.909577	375.823	9.60775	377.739	9.12682	390.46	26.9844			17.8598	1.06246	0.506766	2.67269
	16.6024	1.38253	0.5839	3.04328	0.0703391	2.71111	0.890853	438.198	11.4853	466.965	11.392	611.911	29.878			17.4945	1.22466	0.620861	2.59298	0.0788101	2.28555	0.881438	489.017	10.7633	490.387	10.0854	497.744	26.9588			17.2393	0.90379	0.481057	2.62122	0.0601733	2.46048	0.938677	376.679	9.00254	398.798	8.64508	530.049	19.8046			17.9767	1.19425	0.513797	3.34276
	17.4274	1.68437	0.557646	3.04067	0.0705146	2.53151	0.832552	439.255	10.7494	449.993	11.0537	506.202	37.0462			17.2305	1.57886	0.663018	3.57304	0.0828918	3.20528	0.897074	513.361	15.8165	516.458	14.4652	531.162	34.5954			19.251	1.28347	0.431298	3.13792	0.0602445	2.86343	0.912525	377.112	10.4886	364.098	9.60133	283.03	29.3621			18.2662	1.18283	0.508659	3.41906
	17.7631	1.21018	0.55023	3.84831	0.070917	3.65308	0.949268	441.678	15.5945	445.148	13.87	464.077	26.8158			17.4549	1.25723	0.657021	3.55108	0.0832117	3.32108	0.935229	515.265	16.4463	512.79	14.2978	502.748	27.6847			18.7136	1.38181	0.443981	2.77794	0.0602852	2.40988	0.867509	377.36	8.83289	373.056	8.67293	347.39	31.2504			17.6734	1.23629	0.530746	3.46776
	18.1888	1.01727	0.537556	2.85033	0.0709439	2.66262	0.934145	441.84	11.3704	436.812	10.1189	411.345	22.7481			17.4826	1.54906	0.658056	3.03264	0.0834752	2.60717	0.859703	516.832	12.9487	513.424	12.2218	499.219	34.1093			17.0586	1.17478	0.490656	2.79694	0.0607308	2.53826	0.907513	380.068	9.36823	405.357	9.34812	553.053	25.6199			18.195	1.47442	0.517369	2.83533
	17.4345	1.28606	0.584003	3.74981	0.0738777	3.52237	0.939347	459.475	15.6211	467.031	14.0387	505.3	28.296			17.0639	1.37018	0.683326	3.25322	0.0846049	2.9506	0.906979	523.55	14.8372	528.783	13.41	552.404	29.909			17.9656	1.28462	0.484786	2.62393	0.0631946	2.28797	0.87196	395.024	8.76668	401.351	8.69921	438.887	28.6088			18.0189	1.14318	0.528633	3.35919
	16.9673	1.25055	0.647594	3.1714	0.0797267	2.91442	0.918972	494.491	13.8727	506.997	12.6577	564.743	27.2171			17.0665	1.02588	0.686331	3.06046	0.0849897	2.8834	0.942146	525.837	14.5601	530.594	12.6482	552.031	22.3747			16.9269	1.84946	0.515344	2.46679	0.0632938	1.63234	0.661727	395.626	6.2638	422.036	8.5184	569.981	40.2275			17.5549	1.16246	0.546609	3.35192
	17.4767	1.58511	0.629382	3.33235	0.0798105	2.93121	0.879622	494.992	13.9662	495.711	13.0706	500.012	34.9181			16.654	1.14742	0.720243	2.87705	0.0870331	2.63835	0.91703	537.967	13.6173	550.81	12.2317	605.204	24.8414			8.07179	9.44986	1.0829	10.0897	0.0634229	3.53589	0.350445	396.409	13.5943	745.049	53.3124	2012.95	168.008			17.696	0.905145	0.558256	3.11303
	17.3502	1.21299	0.647494	2.46288	0.0815131	2.14346	0.870307	505.148	10.4143	506.935	9.82875	515.944	26.6512			17.2924	1.34294	0.693699	3.08189	0.0870389	2.77391	0.900067	538.001	14.3179	535.021	12.8175	523.269	29.4647			18.5917	1.05199	0.47395	2.96546	0.063935	2.77259	0.934962	399.512	10.7406	393.914	9.68244	362.142	23.7298			17.2912	1.6741	0.593781	3.88111
	17.2413	1.32634	0.652184	3.34508	0.0815883	3.0709	0.918032	505.596	14.9331	509.822	13.4083	529.791	29.039			17.2752	1.23261	0.706327	2.76019	0.0885355	2.46968	0.89475	546.87	12.949	542.563	11.602	525.442	27.0458			16.102	1.25928	0.549283	2.87877	0.0641747	2.58873	0.899249	400.964	10.0637	444.527	10.3637	677.689	26.9167			17.6138	1.26569	0.591997	3.72643
	19.2835	3.20688	0.587865	4.54798	0.0822527	3.22491	0.709086	509.555	15.8	469.503	17.0983	279.173	73.4406			17.0979	0.982186	0.720039	2.88185	0.089328	2.70931	0.940129	551.561	14.3221	550.69	12.2501	548.059	21.452			18.0474	1.06978	0.491963	3.2656	0.064422	3.0854	0.94482	402.462	12.0379	406.247	10.9341	428.769	23.8496			17.6457	1.37876	0.596686	3.58369
	18.0202	1.226	0.629329	2.88692	0.082286	2.61367	0.905347	509.753	12.8101	495.678	11.3228	432.126	27.3258			16.8634	1.29614	0.744316	2.9164	0.0910732	2.61255	0.895812	561.881	14.0579	564.921	12.6366	578.146	28.1629			17.98	1.01142	0.497143	2.80452	0.0648575	2.61579	0.932706	405.099	10.2705	409.767	9.45626	437.099	22.5177			26.8951	3.43196	0.414861	47.0689
	17.6998	1.35635	0.644354	3.16912	0.0827524	2.8642	0.903784	512.531	14.1115	504.999	12.6102	471.982	30.0236			16.8929	1.05127	0.768652	2.87519	0.0942154	2.6761	0.930758	580.419	14.8539	578.989	12.6884	574.316	22.8585			18.5653	2.26967	0.481567	3.59442	0.0648704	2.78719	0.775423	405.177	10.9455	399.147	11.8635	365.343	51.1644			16.9929	1.43492	0.666221	3.01845
	19.0536	1.81851	0.598838	3.43301	0.0827891	2.91179	0.848176	512.749	14.3519	476.496	13.0567	306.546	41.42			16.6945	1.03777	0.791791	2.62761	0.0959117	2.41399	0.918703	590.405	13.6192	592.187	11.7905	599.954	22.4508			18.1964	0.843416	0.492071	2.35677	0.064968	2.20068	0.933771	405.768	8.65444	406.321	7.89212	410.415	18.8637			16.4246	1.55648	0.69748	3.74031
	16.661	1.41431	0.686416	3.43139	0.0829805	3.12636	0.911108	513.889	15.4424	530.645	14.1824	604.291	30.6003			16.5851	1.16759	0.800933	3.45527	0.0963834	3.25202	0.941176	593.179	18.4295	597.355	15.6043	614.16	25.2195			17.9838	1.18776	0.498079	2.2581	0.064993	1.92047	0.850483	405.919	7.55521	410.401	7.62332	436.638	26.4656			17.4267	1.39046	0.664579	2.9394
	17.1106	1.31661	0.668553	3.26637	0.083002	2.98926	0.915164	514.016	14.7687	519.832	13.2897	546.402	28.7841			15.6484	1.21499	0.849638	2.87711	0.0964698	2.60798	0.906459	593.687	14.7917	624.45	13.4202	738.446	25.713			18.3051	1.01846	0.497111	2.73207	0.0660257	2.53514	0.92792	412.167	10.122	409.745	9.21156	397.076	22.8318			17.2355	1.45426	0.675054	3.29731
	17.1405	2.12466	0.667504	3.69258	0.0830168	3.02009	0.817881	514.104	14.9235	519.193	15.0099	542.589	46.4476			16.1169	1.18713	0.848623	3.45897	0.0992393	3.24887	0.939261	609.949	18.9079	623.893	16.1242	675.713	25.3914			18.2141	1.09056	0.502871	2.52669	0.0664586	2.27921	0.902056	414.785	9.1561	413.644	8.58473	408.239	24.4009			16.5896	1.57478	0.718845	3.12486
	17.3805	1.4221	0.659755	3.64554	0.0832016	3.35673	0.920776	515.205	16.621	514.464	14.715	512.152	31.2514			16.6907	1.30653	0.820359	3.65352	0.0993494	3.41192	0.933872	610.595	19.8769	608.249	16.7197	600.439	28.2755			16.9171	2.6203	0.541451	3.46829	0.0664621	2.27224	0.655147	414.805	9.12854	439.381	12.3708	571.204	57.0163			17.0766	1.5837	0.698837	3.87615
	16.7246	1.85152	0.685812	3.68778	0.0832239	3.18929	0.864828	515.337	15.7959	530.281	15.2343	596.043	40.1163			16.446	1.08335	0.849913	2.39633	0.10142	2.13747	0.891975	622.724	12.6878	624.602	11.1794	632.367	23.3508			17.5546	0.985373	0.524278	2.15752	0.0667792	1.91936	0.889613	416.722	7.74535	428.005	7.53512	490.177	21.7253			16.9377	1.3555	0.708027	3.41484
	17.2829	1.26229	0.663695	3.85796	0.0832288	3.64561	0.944958	515.366	18.0569	516.872	15.6285	524.467	27.6885			16.5285	1.2675	0.846307	3.38458	0.101496	3.13828	0.927229	623.172	18.6414	622.62	15.7541	621.535	27.3644			18.6008	1.10391	0.494899	2.46324	0.0667937	2.20202	0.893956	416.809	8.88782	408.244	8.28038	361.039	24.8835			17.0044	1.3723	0.728172	3.3076
	17.5279	1.45179	0.6545	4.01213	0.083239	3.74025	0.932236	515.427	18.5278	511.244	16.117	493.524	32.0077			14.8287	1.06953	1.13821	2.41438	0.122465	2.16456	0.896529	744.738	15.224	771.661	13.0506	851.293	22.2277			18.2122	1.06055	0.50588	2.3829	0.0668493	2.13388	0.895496	417.146	8.61948	415.675	8.12833	408.471	23.7287			17.1127	1.25204	0.726233	3.30305
	17.2573	1.15704	0.665496	2.86828	0.0833311	2.62455	0.915027	515.975	13.0143	517.97	11.6378	527.756	25.3612			14.9584	1.40512	1.16375	3.56939	0.126308	3.28119	0.919257	766.768	23.7205	783.714	19.4953	833.178	29.3068			17.9627	1.19512	0.512974	3.00951	0.0668582	2.76204	0.91777	417.2	11.1583	420.447	10.3611	439.245	26.6153			17.0526	1.06347	0.74833	2.76635
	17.2185	1.28333	0.667518	2.74338	0.083396	2.4247	0.883838	516.361	12.0319	519.202	11.1513	532.696	28.1025			14.33	1.07799	1.52957	3.27882	0.159039	3.09654	0.944409	951.436	27.3908	942.325	20.1338	922.006	22.1654			17.8674	1.11595	0.517185	2.89314	0.0670496	2.66925	0.922615	418.356	10.8123	423.269	10.0143	451.067	24.7915			16.7591	1.31888	0.76266	2.95579
	17.422	1.07107	0.660093	3.34019	0.0834432	3.16381	0.947194	516.642	15.7077	514.671	13.4865	506.903	23.5589			14.208	1.1017	1.45964	2.94599	0.150476	2.73224	0.927442	903.629	23.0371	913.861	17.7533	939.529	22.5831			18.1139	0.899468	0.511213	2.76931	0.0671897	2.61917	0.945783	419.202	10.6302	419.265	9.51241	420.557	20.0811			16.6585	1.10088	0.77109	2.93966
	17.1318	1.07501	0.674311	3.24747	0.0838206	3.06438	0.94362	518.887	15.2776	523.33	13.2808	543.711	23.5178			14.1595	1.28379	1.44675	4.15616	0.148638	3.95292	0.951099	893.325	32.9752	908.524	24.9582	946.539	26.2869			17.8955	0.993373	0.519659	2.31541	0.0674762	2.09149	0.903292	420.932	8.5225	424.924	8.0397	447.579	22.0742			16.7324	1.23282	0.771799	3.42094
	17.9576	1.17417	0.645144	2.96797	0.0840608	2.72584	0.918418	520.316	13.6257	505.486	11.8185	439.875	26.1391			14.1106	0.964761	1.41816	3.53253	0.145197	3.39824	0.961984	873.982	27.7748	896.59	21.0387	953.645	19.7379			18.4695	0.926342	0.50536	2.28375	0.0677243	2.08744	0.91404	422.431	8.53528	415.324	7.7848	376.991	20.8398			16.8936	1.34981	0.779549	3.57142
	17.008	1.18269	0.68363	2.87544	0.0843649	2.62096	0.911497	522.124	13.1451	528.966	11.8557	559.55	25.8038			14.075	1.26169	1.56652	3.14681	0.159982	2.88281	0.916104	956.678	25.6305	957.049	19.505	958.774	25.7914			17.9554	1.02318	0.520671	2.95659	0.067834	2.7739	0.938209	423.093	11.3594	425.6	10.2793	440.145	22.7873			16.6193	1.07801	0.79439	2.95216
	17.2802	1.27682	0.672937	3.4048	0.0843746	3.15633	0.927023	522.182	15.8319	522.497	13.9073	524.808	27.9941			14.0542	1.59095	1.65812	4.00305	0.169087	3.67332	0.917631	1007.08	34.2487	992.658	25.3602	961.838	32.5049			19.0114	1.2999	0.492648	2.79131	0.0679579	2.47016	0.884945	423.841	10.1328	406.714	9.3547	311.6	29.5796			16.7744	1.23905	0.793477	3.42715
	17.5599	1.15698	0.662292	3.06424	0.0843839	2.83743	0.92598	522.237	14.2338	516.015	12.397	489.496	25.5173			14.0328	1.08309	1.55697	3.47603	0.158531	3.30298	0.950217	948.607	29.1363	953.267	21.4948	964.946	22.1201			18.2676	0.901621	0.513559	2.63515	0.0680704	2.47611	0.939645	424.52	10.1729	420.839	9.079	401.671	20.1957			16.4681	1.22905	0.810052	3.27502
	16.7471	1.5102	0.694605	3.29521	0.0844045	2.92877	0.888796	522.359	14.6953	535.564	13.7154	593.167	32.7157			13.9761	1.56105	1.67246	3.00013	0.169601	2.56202	0.853968	1009.91	23.9493	998.122	19.0663	973.211	31.8152			17.8736	1.09138	0.525073	2.50243	0.0680957	2.2519	0.899884	424.673	9.25501	428.535	8.74847	450.301	24.2498			16.4756	1.37449	0.810239	3.19994
	17.0472	1.03081	0.683042	3.20445	0.0844867	3.03413	0.946848	522.848	15.2376	528.611	13.2057	554.52	22.4901			13.9618	1.21628	1.68711	2.95281	0.170912	2.69067	0.911226	1017.13	25.318	1003.67	18.8266	975.267	24.7867			17.9726	0.744634	0.524655	2.54609	0.0684184	2.43476	0.956277	426.62	10.051	428.256	8.89644	438.016	16.5832			16.7274	1.16541	0.798683	3.32705
	17.2821	1.20971	0.673795	3.85941	0.0844912	3.66492	0.949606	522.875	18.4064	523.017	15.7765	524.574	26.5384			13.8744	0.990562	1.58802	2.83271	0.159867	2.65387	0.936867	956.038	23.5804	965.522	17.6508	988.074	20.1383			18.1659	1.11625	0.52207	2.62807	0.0688133	2.37923	0.905315	429.002	9.87474	426.533	9.15319	414.164	24.9491			16.2817	1.25629	0.821878	3.64057
	16.9643	1.12207	0.686437	3.63122	0.0844939	3.45351	0.95106	522.891	17.3452	530.658	15.0088	565.126	24.4489			13.8664	1.37455	1.6062	3.14933	0.161604	2.83353	0.899725	965.684	25.4122	972.628	19.7103	989.213	27.9435			17.9948	1.18856	0.529796	2.50588	0.0691742	2.20608	0.88036	431.179	9.20101	431.674	8.81204	435.267	26.4687			16.7449	0.955616	0.802874	3.24564
	16.8101	1.35702	0.693974	3.41674	0.0846452	3.1357	0.917746	523.79	15.775	535.185	14.2137	585.019	29.4349			13.7814	0.991957	1.70175	2.6628	0.170167	2.47114	0.928023	1013.03	23.1656	1009.19	17.0318	1001.72	20.1206			17.9936	1.27093	0.532859	2.83237	0.0695695	2.53122	0.893674	433.562	10.6135	433.705	9.99779	435.416	28.3231			16.5089	1.06598	0.820879	3.6443
	17.1273	1.33129	0.681229	3.04956	0.0846581	2.74362	0.899679	523.867	13.8044	527.517	12.5474	544.287	29.0969			13.7798	1.35239	1.71289	3.59888	0.171262	3.33512	0.926709	1019.06	31.4369	1013.37	23.0765	1001.95	27.4388			17.7998	0.980341	0.543349	2.5046	0.0701748	2.30477	0.920214	437.209	9.74254	440.63	8.95353	459.485	21.7394			16.3394	1.05032	0.830005	3.82677
	17.3834	1.13167	0.671197	2.67584	0.0846589	2.42476	0.906166	523.872	12.2002	521.44	10.9126	511.737	24.8657			13.7653	1.14766	1.64768	2.85703	0.164568	2.61639	0.915773	982.115	23.8344	988.662	18.055	1004.09	23.2943			17.9629	0.983351	0.540446	2.82552	0.0704397	2.64889	0.937486	438.804	11.2367	438.719	10.0658	439.216	21.883			16.2319	1.30702	0.835944	3.09357
	17.2191	1.02035	0.678803	2.9958	0.0848091	2.81669	0.940211	524.764	14.1954	526.051	12.3001	532.612	22.3259			13.7636	1.01431	1.75019	2.61253	0.174784	2.40759	0.921554	1038.42	23.0912	1027.23	16.8831	1004.35	20.5862			17.3476	1.16046	0.563919	2.58854	0.0709815	2.31384	0.893879	442.066	9.88587	454.074	9.47763	516.265	25.5046			16.5961	1.27184	0.818179	3.83652
	17.1351	0.929366	0.682232	2.18027	0.0848217	1.97227	0.904599	524.839	9.94106	528.123	8.97836	543.313	20.3156			13.7313	1.23865	1.67444	3.6691	0.166828	3.4537	0.941294	994.613	31.8324	998.874	23.3294	1009.1	25.1015			17.4147	0.781656	0.562899	2.11668	0.0711268	1.96706	0.929316	442.941	8.42033	453.412	7.74092	507.833	17.1792			16.8088	1.05562	0.809312	3.09737
	17.3613	1.25413	0.674684	3.14221	0.0849907	2.88108	0.916897	525.843	14.5485	523.556	12.8545	514.529	27.5555			13.7246	1.18513	1.73013	3.41988	0.172292	3.20796	0.938035	1024.73	30.3934	1019.8	22.0092	1010.1	24.0326			18.1784	1.75177	0.54219	3.31331	0.0715144	2.81235	0.848804	445.273	12.0999	439.867	11.8284	412.627	39.1666			16.4056	1.3224	0.831064	3.45215
	17.4792	1.03603	0.674625	2.8091	0.0855603	2.61107	0.929504	529.227	13.2665	523.52	11.4911	499.686	22.8067			13.6884	1.08712	1.74213	2.85043	0.173029	2.63498	0.924415	1028.78	25.0558	1024.25	18.3899	1015.45	22.0147			17.4842	1.12483	0.564227	2.38436	0.0715795	2.10237	0.88173	445.665	9.05297	454.274	8.73308	499.015	24.7537			16.425	1.42064	0.84663	3.1969
	17.2472	1.06167	0.685196	3.63861	0.0857475	3.48028	0.956486	530.338	17.7185	529.91	15.0232	529.041	23.2719			13.6845	1.52925	1.69413	2.90835	0.168214	2.47384	0.8506	1002.26	22.9632	1006.32	18.5718	1016.02	30.9889			17.7879	1.08497	0.555529	2.49201	0.0717002	2.24343	0.900247	446.391	9.67559	448.612	9.03691	460.961	24.0607			16.4339	1.19885	0.860685	3.4537
	17.6451	1.35647	0.669831	3.34095	0.0857584	3.05319	0.913867	530.403	15.5459	520.61	13.6088	478.811	30.0013			13.6481	1.42415	1.75585	3.41486	0.17388	3.10372	0.908886	1033.45	29.6366	1029.32	22.0955	1021.41	28.8364			17.8717	0.902324	0.554211	3.38347	0.0718668	3.26093	0.963783	447.393	14.0944	447.752	12.2512	450.542	20.0626			16.0595	1.13871	0.912145	2.76212
	17.2817	1.2944	0.692005	2.86715	0.0867727	2.55834	0.892292	536.422	13.1681	534.004	11.9072	524.621	28.3835			13.6384	1.03726	1.77632	2.69812	0.175781	2.49077	0.92315	1043.88	24.0049	1036.84	17.5302	1022.86	20.9919			17.9698	1.10709	0.556753	2.46251	0.0725927	2.19961	0.893241	451.757	9.59673	449.411	8.94255	438.367	24.6619			14.8483	0.980803	1.10369	2.26396
	16.8053	0.988568	0.71976	2.8226	0.087765	2.64383	0.936663	542.306	13.7511	550.525	11.9955	585.645	21.4554			13.6212	1.00188	1.65609	3.37126	0.163677	3.21895	0.954821	977.176	29.1871	991.881	21.3465	1025.41	20.2878			11.7296	4.52872	0.862838	5.86558	0.0734347	3.72771	0.635522	456.815	16.4394	631.671	27.5932	1321.31	87.7723			15.5496	1.0368	1.0634	3.02808
	17.1374	1.76025	0.71123	3.74359	0.0884389	3.30394	0.882558	546.298	17.3058	545.476	15.7999	542.975	38.4938			13.6163	1.32468	1.72301	3.02301	0.170229	2.71732	0.898878	1013.37	25.4815	1017.15	19.425	1026.14	26.8157			17.9717	0.816183	0.566359	2.78466	0.0738533	2.66236	0.956082	459.329	11.8035	455.657	10.2239	438.126	18.1785			15.1753	1.35972	1.18255	3.55231
	16.5048	1.55609	0.753458	3.56008	0.0902313	3.20199	0.899416	556.905	17.0836	570.229	15.5341	624.631	33.5746			13.6088	1.14167	1.73077	3.45848	0.170902	3.26461	0.943944	1017.08	30.717	1020.04	22.2607	1027.26	23.1089			17.6192	1.21405	0.581045	2.42251	0.0742822	2.09634	0.865359	461.903	9.34428	465.133	9.04008	482.092	26.8201			14.5916	1.36266	1.33679	3.27161
	16.6108	1.16919	0.753776	2.29132	0.0908492	1.97057	0.860015	560.558	10.5795	570.413	9.99993	610.811	25.2686			13.5826	1.20358	1.70905	3.70029	0.168433	3.49907	0.945622	1003.47	32.516	1011.93	23.7073	1031.14	24.3476			17.5467	1.0322	0.594048	2.63343	0.0756319	2.4227	0.919981	469.997	10.9815	473.449	9.96518	491.151	22.7549			14.3255	1.30109	1.36415	3.22778
	17.2113	1.19925	0.727848	3.30413	0.0908952	3.07881	0.931807	560.829	16.5371	555.289	14.1335	533.606	26.2683			13.5797	1.08085	1.81636	3.31069	0.17897	3.12928	0.945206	1061.34	30.6227	1051.37	21.6834	1031.58	21.865			18.0875	0.964088	0.581874	2.69849	0.0763651	2.52039	0.934001	474.39	11.5272	465.665	10.0791	423.819	21.5126			14.4358	0.970026	1.47337	2.89688
	16.9262	1.03953	0.755886	2.91983	0.0928331	2.72851	0.934477	572.271	14.9415	571.634	12.7635	570.071	22.6208			13.5744	1.14018	1.64559	3.07905	0.16208	2.86016	0.928911	968.323	25.716	987.86	19.4491	1032.38	23.0615			17.4907	0.956152	0.602512	3.1393	0.0764645	2.99015	0.952488	474.985	13.6921	478.826	11.9852	498.205	21.0629			14.3815	1.46358	1.47971	3.19149
	16.6135	1.16697	0.771154	3.43258	0.0929588	3.22812	0.940437	573.012	17.6993	580.425	15.1764	610.462	25.2225			13.5683	0.814678	1.71844	2.33005	0.169179	2.18299	0.936884	1007.59	20.3628	1015.44	14.9569	1033.28	16.4803			18.3543	1.37654	0.577644	3.38038	0.0769284	3.08741	0.913332	477.763	14.2172	462.946	12.5681	391.046	30.8926			14.3144	1.28192	1.49157	3.95251
	16.4014	1.36624	0.802271	3.38025	0.0954749	3.09184	0.914678	587.836	17.371	598.109	15.2796	638.213	29.3964			13.5503	1.31112	1.74013	3.48783	0.171087	3.23201	0.926655	1018.1	30.4385	1023.51	22.494	1035.96	26.5017			17.4878	0.965412	0.614387	2.65393	0.0779588	2.47211	0.93149	483.928	11.5252	486.323	10.2558	498.561	21.2653			14.2364	1.03049	1.50895	3.16414
	16.2292	1.6295	0.820162	3.1228	0.0965793	2.66395	0.853064	594.331	15.1248	608.139	14.2887	660.856	34.9366			13.5428	1.00116	1.75917	3.32783	0.172863	3.17366	0.953673	1027.87	30.1535	1030.54	21.5469	1037.08	20.2371			17.1976	1.19095	0.625497	2.85936	0.0780512	2.59954	0.909132	484.48	12.1326	493.287	11.1726	535.357	26.069			14.2191	1.05045	1.50145	2.89116
	16.4122	1.27832	0.811207	2.96901	0.0966018	2.67972	0.902565	594.464	15.2176	603.131	13.503	636.8	27.5287			13.5196	1.23485	1.67518	2.90469	0.164329	2.62914	0.905135	980.787	23.9205	999.153	18.4708	1040.54	24.9439			17.6253	1.00391	0.611201	2.47567	0.0781641	2.26299	0.91409	485.155	10.576	484.317	9.53607	481.291	22.1902			14.1466	1.13361	1.58188	2.74049
	16.8136	1.05056	0.795303	2.68115	0.0970245	2.46676	0.920038	596.948	14.064	594.176	12.0605	584.53	22.7947			13.5181	1.37885	1.80971	2.85128	0.177505	2.49571	0.875294	1053.33	24.2528	1048.97	18.6494	1040.77	27.8502			15.8981	0.73482	0.679339	3.29503	0.0783648	3.21205	0.974816	486.355	15.0472	526.375	13.5352	704.874	15.6259			14.1428	1.20279	1.57615	2.94217
	16.5067	1.07342	0.814568	2.34047	0.0975608	2.0798	0.888624	600.098	11.9175	605.013	10.6685	624.386	23.1674			13.5022	1.17797	1.87996	3.67019	0.18418	3.47601	0.947094	1089.77	34.852	1074.05	24.3312	1043.13	23.7868			17.8998	2.46528	0.633295	3.68785	0.0822509	2.74275	0.743725	509.544	13.4375	498.146	14.5203	447.053	54.8007			14.0562	1.39584	1.53761	3.83278
	16.8158	1.03041	0.806612	3.04647	0.0984168	2.86692	0.941063	605.124	16.5591	600.552	13.8119	584.25	22.3688			13.4896	1.11418	1.86663	2.92066	0.182703	2.69978	0.924376	1081.72	26.8856	1069.34	19.313	1045.05	22.4938			17.1895	1.03915	0.663435	2.94993	0.0827463	2.76085	0.935901	512.494	13.6014	516.713	11.9469	536.378	22.7638			14.0441	1.43847	1.594	3.20817
	16.5958	1.82996	0.82277	3.10837	0.0990749	2.51261	0.808337	608.985	14.6009	609.593	14.2474	612.769	39.5383			13.4849	1.45034	1.80106	3.72977	0.176223	3.43623	0.921299	1046.31	33.1878	1045.84	24.3557	1045.77	29.271			16.9826	0.825897	0.70098	2.58439	0.0863769	2.44887	0.947562	534.074	12.5517	539.376	10.8146	562.782	18.0027			14.0311	1.13349	1.62302	3.62013
	16.762	1.26414	0.8239	3.12835	0.100205	2.86156	0.914718	615.61	16.8011	610.222	14.3499	591.203	27.4115			13.4583	1.16619	1.80441	2.92692	0.176203	2.68456	0.917196	1046.2	25.9253	1047.06	19.1243	1049.74	23.5262			16.6304	1.01404	0.732641	2.56649	0.0884063	2.35767	0.918635	546.105	12.3451	558.102	11.0197	608.258	21.925			14.0144	0.872933	1.65781	3.07751
	16.3079	1.5103	0.851959	2.54364	0.10081	2.04673	0.804645	619.155	12.0829	625.724	11.8821	650.496	32.4278			13.4508	1.17058	1.88439	3.53631	0.18391	3.33696	0.943625	1088.3	33.4164	1075.61	23.4625	1050.87	23.6099			17.0429	1.20629	0.716696	2.68937	0.0886268	2.40366	0.893763	547.411	12.6147	548.715	11.4009	555.06	26.3015			13.9811	1.20927	1.58126	3.17216
	16.0663	0.887332	0.866642	2.93091	0.101028	2.79336	0.95307	620.433	16.5231	633.742	13.8178	682.415	18.9704			13.4388	1.21098	1.90377	3.3376	0.185637	3.11016	0.931855	1097.7	31.3919	1082.41	22.2221	1052.66	24.4175			17.3504	1.10776	0.707821	3.01485	0.0891087	2.80396	0.930049	550.264	14.789	543.451	12.6882	515.916	24.3277			13.9372	1.1512	1.65972	2.97956
	15.8763	1.58763	0.926783	4.06714	0.106762	3.74446	0.920664	653.913	23.2847	665.941	19.8664	707.809	33.756			13.43	1.17818	1.90976	3.23208	0.186098	3.00969	0.931193	1100.2	30.4414	1084.5	21.5426	1053.99	23.7364			16.8069	1.2053	0.744182	2.84521	0.0907517	2.57731	0.905839	559.981	13.8234	564.843	12.3269	585.436	26.1501			13.8508	1.09103	1.65783	2.75245
	15.6956	1.12207	1.07362	3.14249	0.122269	2.93534	0.93408	743.608	20.6156	740.514	16.522	732.111	23.7604			13.4228	1.11441	1.75102	3.63226	0.170538	3.45708	0.951771	1015.08	32.469	1027.54	23.4791	1055.07	22.4544			17.1388	1.01534	0.73174	2.65794	0.0909964	2.45637	0.924162	561.427	13.2073	557.574	11.4043	542.804	22.1969			13.8087	1.27655	1.63637	3.20428
	15.2451	0.927448	1.20923	2.78534	0.13376	2.6264	0.942936	809.28	19.9749	804.837	15.4814	793.456	19.4736			13.4073	1.08927	1.85808	3.01597	0.180757	2.8124	0.932501	1071.11	27.7544	1066.31	19.9115	1057.39	21.9303			17.3167	2.0066	0.725691	3.24383	0.0911811	2.54873	0.785715	562.518	13.7293	554.021	13.8517	520.182	44.0191			13.8014	1.58654	1.62701	3.38773
	14.3809	1.22915	1.45034	3.31164	0.151337	3.07509	0.928568	908.452	26.0567	910.014	19.9055	914.722	25.2899			13.4004	1.06114	1.80467	2.87073	0.175471	2.66741	0.929174	1042.18	25.6686	1047.15	18.758	1058.42	21.3611			15.9322	1.15589	0.789484	2.52527	0.0912659	2.2452	0.889091	563.019	12.1046	590.879	11.3128	700.284	24.6076			13.7959	0.992894	1.714	2.73797
	14.0817	1.08034	1.59067	2.76257	0.162526	2.54257	0.920364	970.799	22.9146	966.561	17.2248	957.809	22.0711			13.393	0.914795	1.67187	2.35648	0.162468	2.17166	0.921573	970.476	19.5658	997.897	14.9731	1059.55	18.4141			16.9421	0.839165	0.743507	2.58675	0.0913985	2.44685	0.945917	563.803	13.2094	564.45	11.2012	568.029	18.2883			13.7883	1.11149	1.6418	3.05499
	14.0729	1.17614	1.64562	3.13805	0.168036	2.9093	0.927105	1001.28	26.9808	987.873	19.822	959.079	24.0359			13.3925	1.35319	1.80129	2.63458	0.175039	2.2605	0.858014	1039.81	21.7073	1045.92	17.2031	1059.61	27.235			17.075	1.18363	0.742096	3.05375	0.0919406	2.81503	0.921828	567.004	15.2795	563.628	13.2092	550.976	25.861			13.7599	1.22388	1.68253	3.7104
	14.0328	1.0105	1.48129	3.56488	0.150825	3.41867	0.958984	905.588	28.883	922.76	21.6124	964.942	20.63			13.3443	1.0983	1.84328	3.32625	0.178475	3.1397	0.943915	1058.64	30.6525	1061.03	21.899	1066.86	22.0817			17.5384	1.14918	0.728658	2.56863	0.0927258	2.29723	0.894339	571.638	12.5664	555.765	10.9942	492.245	25.3192			13.7596	1.45582	1.71708	3.5483
	13.9543	1.03857	1.64195	2.40322	0.166248	2.16722	0.901799	991.407	19.9154	986.463	15.1667	976.387	21.1689			13.3411	1.04019	1.7949	3.2673	0.173749	3.0973	0.947968	1032.73	29.5563	1043.61	21.3087	1067.35	20.9032			18.4807	2.40617	0.696579	3.64419	0.0934064	2.73687	0.751023	575.651	15.0719	536.746	15.1936	375.632	54.1289			13.7572	0.951804	1.75624	2.61245
	13.9328	1.06371	1.57855	2.54601	0.159582	2.31315	0.90854	954.455	20.5214	961.8	15.8273	979.496	21.6709			13.2906	1.38583	1.81884	3.22895	0.175399	2.91643	0.903215	1041.79	28.0552	1052.27	21.1581	1074.97	27.8092			17.0303	1.85197	0.774751	3.32147	0.0957355	2.75724	0.830127	589.369	15.5296	582.485	14.7236	556.682	40.3934			13.7495	1.47527	1.6211	2.98682
	13.9076	1.22366	1.6989	3.43186	0.171439	3.20629	0.934272	1020.03	30.2492	1008.12	21.9386	983.217	24.9149			13.2284	1.2572	1.8871	2.908	0.18113	2.6222	0.901718	1073.14	25.9226	1076.56	19.3024	1084.39	25.1921			17.0907	1.10504	0.7726	2.57782	0.0958079	2.32896	0.90346	589.795	13.1265	581.253	11.4089	548.989	24.1536			13.7429	1.03589	1.75452	3.18764
	13.8935	1.1584	1.66233	3.72713	0.167578	3.54255	0.950474	998.754	32.777	994.265	23.6341	985.259	23.5602			13.2251	1.52715	1.83885	3.83706	0.176455	3.52006	0.917385	1047.58	34.0354	1059.45	25.2419	1084.88	30.6029			16.8193	0.995847	0.785974	2.54662	0.0959186	2.34384	0.920371	590.446	13.2242	588.886	11.3801	583.801	21.62			13.711	1.09105	1.72457	3.42887
	13.8156	1.02433	1.71653	3.24098	0.172071	3.07485	0.94874	1023.51	29.1004	1014.73	20.7971	996.706	20.8132			13.1276	1.71084	1.8419	3.66422	0.175444	3.2403	0.884308	1042.04	31.1777	1060.54	24.1186	1099.71	34.2113			17.0383	0.681801	0.782795	2.45572	0.0967745	2.35917	0.960686	595.479	13.4191	587.076	10.9489	555.689	14.8639			13.7048	1.42415	1.64942	4.07323
	13.8139	1.12158	1.6997	3.66772	0.170364	3.49202	0.952096	1014.11	32.7684	1008.42	23.4509	996.964	22.7774			13.1131	1.25032	1.87271	2.87782	0.178182	2.59202	0.900688	1057.03	25.2703	1071.49	19.0513	1101.92	24.9885			16.772	0.755652	0.799282	2.49991	0.0972689	2.38297	0.953222	598.384	13.6175	596.424	11.2765	589.899	16.3779			13.6921	1.33588	1.69693	3.46125
	13.8121	1.05196	1.70368	2.26804	0.170741	2.00932	0.885929	1016.19	18.8906	1009.92	14.5125	997.193	21.3737			13.1116	1.02667	1.90019	2.89275	0.180776	2.70443	0.934899	1071.21	26.6913	1081.16	19.247	1102.14	20.5325			16.5006	1.14215	0.813933	2.87974	0.0974488	2.64356	0.917984	599.441	15.1321	604.658	13.1213	625.181	24.646			13.6444	1.45281	1.77569	3.86095
	13.8091	1.17991	1.67578	3.07187	0.167907	2.83623	0.92329	1000.57	26.2859	999.38	19.5368	997.637	23.9626			13.0079	1.08468	1.94601	3.17049	0.18367	2.97918	0.939657	1087	29.8007	1097.07	21.2682	1118.01	21.6422			16.7434	0.941997	0.803192	3.02412	0.0975776	2.87366	0.950248	600.197	16.4691	598.628	13.6783	593.652	20.3968			13.632	1.15992	1.73844	2.74894
	13.8028	1.48956	1.71577	3.89306	0.171836	3.59682	0.923906	1022.22	34.0007	1014.44	24.979	998.562	30.2395			12.9939	1.1854	2.06466	3.51171	0.194659	3.30559	0.941305	1146.56	34.7218	1137.16	24.0268	1120.16	23.6349			16.2133	0.869064	0.829521	2.54966	0.0975857	2.39698	0.940116	600.245	13.7382	613.347	11.7388	662.936	18.6			13.605	1.1197	1.80163	2.83131
	13.8016	0.910108	1.61421	2.85211	0.16165	2.70301	0.947721	965.941	24.2476	975.745	17.8839	998.744	18.4872			12.9766	1.08052	1.96465	3.13661	0.184983	2.94462	0.938791	1094.14	29.6327	1103.48	21.1088	1122.81	21.5425			16.6918	1.13726	0.80855	3.20454	0.0979261	2.99595	0.934908	602.243	17.2258	601.64	14.548	600.29	24.603			13.5987	1.00289	1.77702	2.84345
	13.7998	1.45185	1.68082	3.69683	0.168299	3.39981	0.919655	1002.73	31.5721	1001.29	23.5391	999.004	29.4713			12.9651	1.24327	2.02724	3.15049	0.190708	2.8948	0.918842	1125.21	29.8885	1124.69	21.4255	1124.57	24.7928			16.5079	0.872882	0.822126	2.94951	0.0984735	2.81739	0.955206	605.457	16.2816	609.234	13.5134	624.222	18.8432			13.5478	0.992826	1.58745	2.59165
	13.7975	1.85895	1.69372	3.86589	0.169563	3.38961	0.876797	1009.7	31.6795	1006.17	24.6862	999.341	37.7395			12.9501	1.13385	2.10461	2.81751	0.197757	2.5793	0.915452	1163.26	27.4527	1150.32	19.3961	1126.85	22.5907			16.746	1.08614	0.812339	2.76063	0.0987042	2.53799	0.919351	606.81	14.6982	603.766	12.5649	593.315	23.5221			13.5285	1.01604	1.49561	2.79704
	13.787	1.09378	1.72012	3.23049	0.172075	3.03969	0.940938	1023.53	28.7682	1016.07	20.7458	1000.89	22.2106			12.9153	1.17235	2.10563	3.63131	0.197322	3.43686	0.946451	1160.92	36.5132	1150.65	25.0042	1132.22	23.3424			16.5922	1.04028	0.820013	2.46108	0.0987218	2.23041	0.906273	606.914	12.919	608.056	11.2595	613.233	22.4813			13.5212	1.3314	1.75905	3.22251
	13.7664	1.05695	1.73718	3.34531	0.173521	3.17395	0.948776	1031.48	30.254	1022.42	21.5612	1003.93	21.4338			12.8988	1.08687	2.03401	2.77602	0.190366	2.55441	0.920169	1123.36	26.3342	1126.96	18.899	1134.75	21.6321			16.6747	0.825167	0.816619	2.50801	0.0988018	2.36838	0.944326	607.383	13.7283	606.16	11.4481	602.512	17.8377			13.502	1.1673	1.74949	3.6529
	13.7207	1.11058	1.70517	2.97859	0.169758	2.76381	0.92789	1010.78	25.8561	1010.47	19.0663	1010.67	22.509			12.8829	1.31406	2.06454	3.03292	0.192986	2.73347	0.901266	1137.53	28.5052	1137.12	20.7496	1137.24	26.144			16.8327	2.21789	0.810298	3.22076	0.0989662	2.33544	0.72512	608.348	13.5578	602.621	14.6391	582.071	48.1758			13.4882	1.287	1.80869	3.12625
	13.7019	1.20253	1.69989	4.08478	0.169001	3.90376	0.955684	1006.6	36.3814	1008.49	26.1197	1013.45	24.3734			12.8759	1.13113	2.11282	3.42673	0.197392	3.23466	0.943949	1161.3	34.3751	1153	23.6209	1138.32	22.4828			16.4463	0.796252	0.833422	2.01857	0.0994537	1.85489	0.918912	611.207	10.8163	615.509	9.31726	632.326	17.157			13.4862	1.41082	1.74656	3.06156
	13.7009	1.0866	1.80027	3.09125	0.178967	2.89397	0.936184	1061.33	28.3196	1045.56	20.1817	1013.6	22.0119			12.8511	1.20952	2.14123	3.05345	0.19966	2.80367	0.9182	1173.49	30.0803	1162.22	21.1372	1142.14	24.0284			16.5291	0.896416	0.837154	1.88126	0.100402	1.65396	0.879176	616.765	9.72827	617.574	8.70463	621.459	19.3597			13.479	1.17813	1.69527	3.19077
	13.6995	1.22205	1.70986	3.59804	0.169962	3.38415	0.940554	1011.9	31.6921	1012.23	23.056	1013.81	24.7665			12.7197	1.08658	2.18173	2.90576	0.201355	2.69496	0.927453	1182.6	29.1182	1175.23	20.2342	1162.53	21.5513			16.5269	0.943994	0.83809	2.6229	0.100501	2.44714	0.932989	617.344	14.4065	618.091	12.1438	621.744	20.3849			13.4657	1.24231	1.73655	3.50043
	13.6847	1.14982	1.7266	3.08021	0.171442	2.85755	0.927714	1020.05	26.9594	1018.49	19.8077	1015.99	23.2893			12.7195	1.11577	2.19884	3.56243	0.202934	3.38319	0.949686	1191.06	36.7927	1180.68	24.8693	1162.54	22.119			16.5262	1.01988	0.846194	2.66332	0.101469	2.46031	0.923775	623.009	14.6106	622.558	12.3956	621.836	22.0043			13.458	1.08844	1.69066	2.62656
	13.6701	1.33012	1.72091	3.11747	0.170695	2.81947	0.904409	1015.94	26.5011	1016.37	20.0232	1018.15	26.9572			12.6972	1.37054	2.05303	3.00928	0.189144	2.67907	0.890267	1116.73	27.4702	1133.3	20.5502	1166.03	27.1531			16.4029	1.05601	0.856999	2.73764	0.101997	2.52577	0.922608	626.102	15.0702	628.483	12.8291	638.021	22.7237			13.45	1.42078	1.82505	3.4905
	13.6609	1.16891	1.69587	3.37944	0.168097	3.17084	0.938275	1001.62	29.4156	1006.98	21.589	1019.51	23.6646			12.663	1.26049	2.11249	2.85632	0.194097	2.56315	0.897361	1143.53	26.858	1152.89	19.6869	1171.41	24.9378			16.6979	1.06189	0.842478	2.5995	0.102072	2.37272	0.91276	626.541	14.1665	620.512	12.0697	599.527	22.994			13.4318	1.01542	1.77968	2.719
	13.6384	1.1302	1.76901	4.00624	0.175058	3.84352	0.959382	1039.92	36.9125	1034.16	25.9937	1022.86	22.8929			12.6596	1.12515	2.11612	3.11519	0.194378	2.9049	0.932495	1145.05	30.476	1154.07	21.4835	1171.94	22.2599			16.6313	0.717327	0.847137	2.46394	0.102227	2.35721	0.956684	627.449	14.0933	623.076	11.4745	608.148	15.51			13.4148	0.982556	1.75684	2.83256
	13.6298	1.29598	1.70535	2.98509	0.168651	2.68909	0.90084	1004.67	25.0167	1010.54	19.1086	1024.14	26.243			12.5836	1.41084	2.18389	3.45777	0.199399	3.15685	0.912973	1172.09	33.8326	1175.92	24.0869	1183.85	27.8969			16.2697	0.979206	0.884481	2.42088	0.104413	2.214	0.914545	640.222	13.4934	643.4	11.5377	655.527	20.985			13.3988	1.1463	1.71893	2.90359
	13.6277	1.21605	1.74776	3.51289	0.17282	3.2957	0.938172	1027.63	31.3062	1026.34	22.6919	1024.45	24.6242			12.5567	1.18613	2.21813	3.20074	0.202092	2.97286	0.928801	1186.55	32.2186	1186.78	22.4045	1188.08	23.4241			16.0363	0.919261	0.94121	2.14899	0.109516	1.94245	0.90389	669.939	12.3599	673.515	10.5802	686.443	19.6274			13.3615	1.61772	1.81322	3.69583
	13.6103	1.22537	1.83519	2.93493	0.181232	2.66688	0.908671	1073.7	26.3769	1058.14	19.292	1027.03	24.8041			12.5427	1.34268	2.24818	2.72656	0.204603	2.37304	0.870344	1200	25.9833	1196.22	19.1641	1190.26	26.5084			15.7309	0.90695	0.973088	2.40774	0.111069	2.2304	0.926343	678.954	14.3732	690.054	12.0577	727.309	19.208			13.36	1.21517	1.79221	4.22291
	13.6033	0.93402	1.67345	3.23074	0.165175	3.09278	0.957298	985.474	28.2634	998.497	20.5367	1028.07	18.907			12.5123	1.1722	2.24745	3.43134	0.204039	3.22491	0.93984	1196.98	35.2301	1195.99	24.117	1195.06	23.1167			16.061	0.830255	0.957817	2.26587	0.11162	2.10828	0.93045	682.152	13.6469	682.165	11.2562	683.118	17.7097			13.3485	1.20324	1.89117	3.74203
	13.5986	0.908335	1.69856	2.46389	0.167595	2.29034	0.929565	998.849	21.1929	1007.99	15.7483	1028.78	18.3852			12.4809	1.15509	2.30576	3.36118	0.208809	3.15647	0.939096	1222.47	35.1493	1214.06	23.8092	1199.98	22.7536			15.1651	1.27079	1.12953	3.24821	0.124288	2.9893	0.920294	755.2	21.3031	767.529	17.4957	804.476	26.6088			13.3475	0.986228	1.79452	3.95642
	13.5955	1.26679	1.74998	3.42844	0.172631	3.18582	0.929233	1026.59	30.2343	1027.16	22.1564	1029.22	25.6331			12.3828	1.07402	2.34277	2.94047	0.210494	2.73731	0.930907	1231.45	30.6846	1225.37	20.9282	1215.55	21.1251			14.9311	0.700366	1.3365	2.51091	0.144794	2.41125	0.960312	871.712	19.6601	861.71	14.5846	836.954	14.5684			13.3419	1.07629	1.78135	3.23117
	13.5929	0.914322	1.77982	2.78608	0.17554	2.63178	0.944617	1042.56	25.3342	1038.11	18.1146	1029.62	18.504			12.3746	1.25626	2.24625	2.99307	0.201686	2.71667	0.907652	1184.37	29.3929	1195.61	21.0322	1216.84	24.6873			14.3837	1.10388	1.45591	2.53884	0.151947	2.2863	0.900529	911.869	19.4408	912.318	15.2834	914.32	22.7111			13.3378	0.935189	1.82252	3.02712
	13.5801	1.17803	1.81562	3.61829	0.178902	3.42116	0.945516	1060.97	33.4682	1051.11	23.6954	1031.52	23.8294			12.3389	1.17722	2.28305	3.07573	0.204399	2.84152	0.923854	1198.91	31.0872	1207.06	21.7211	1222.5	23.1482			14.0607	1.04777	1.57233	2.75348	0.160413	2.54634	0.92477	959.073	22.6915	959.347	17.0911	960.882	21.4259			13.3207	1.21716	1.87189	3.28301
	13.5783	0.997853	1.84405	3.18317	0.181679	3.02272	0.949595	1076.14	29.9589	1061.31	20.9598	1031.79	20.1874			12.332	1.21133	2.33729	3.08416	0.209138	2.83632	0.919642	1224.22	31.6252	1223.7	21.9358	1223.61	23.7981			14.0427	0.963818	1.55762	2.51021	0.158708	2.3178	0.92335	949.596	20.4655	953.523	15.5238	963.505	19.6929			13.293	1.40692	1.78306	3.53068
	13.5721	1.28901	1.69343	4.74275	0.166764	4.56422	0.962358	994.259	42.0544	1006.06	30.2866	1032.71	26.0677			12.2298	0.9487	2.43749	3.92126	0.216296	3.80477	0.970292	1262.27	43.6176	1253.73	28.2403	1239.94	18.6061			14.0196	0.804306	1.55787	2.31477	0.158473	2.17054	0.937692	948.283	19.1406	953.621	14.3159	966.862	16.437			13.2903	0.987241	1.90084	2.88729
	13.5716	0.973631	1.66616	2.851	0.164072	2.6796	0.93988	979.369	24.347	995.724	18.0927	1032.79	19.6944			12.1769	1.149	2.53338	2.83817	0.223833	2.59519	0.914389	1302.1	30.598	1281.67	20.6651	1248.44	22.4946			14.0102	1.05741	1.39762	3.27887	0.142077	3.10369	0.946572	856.396	24.8901	887.93	19.4096	968.202	21.5748			13.2293	1.46587	1.77584	3.42768
	13.5669	1.56663	1.75091	3.30936	0.172358	2.91505	0.880851	1025.09	27.6273	1027.5	21.3907	1033.49	31.675			11.9795	1.19707	2.47733	3.06951	0.215332	2.82647	0.92082	1257.16	32.2835	1265.43	22.2078	1280.35	23.3105			13.9265	0.882013	1.64555	2.49205	0.16628	2.33075	0.935272	991.584	21.4217	987.846	15.7405	980.421	17.9478			13.1007	1.22115	1.96335	3.5967
	13.5331	1.23108	1.72313	3.38914	0.169202	3.15764	0.931694	1007.71	29.4577	1017.19	21.7789	1038.52	24.8761			11.9649	1.39496	2.03415	2.95359	0.176596	2.60341	0.881441	1048.35	25.1894	1127.01	20.1086	1282.72	27.1578			13.9203	1.26658	1.57236	3.07388	0.158813	2.80081	0.911163	950.177	24.7444	959.357	19.0804	981.366	25.7969			13.091	1.2099	1.98332	3.34165
	13.5301	0.933232	1.80867	3.45855	0.177561	3.33026	0.962907	1053.63	32.3715	1048.6	22.618	1038.97	18.8598			11.9567	0.973014	2.55928	3.22709	0.222033	3.07691	0.953462	1292.61	36.039	1289.09	23.5654	1284.06	18.9524			13.852	0.911029	1.66771	2.64492	0.167618	2.48306	0.938806	998.973	22.9788	996.316	16.7905	991.339	18.5071			13.0694	1.22762	2.05543	2.91735
	13.52	0.931289	1.71733	3.7012	0.168468	3.58212	0.967827	1003.66	33.2936	1015.03	23.7554	1040.48	18.8172			11.895	1.13922	2.50236	3.65507	0.215974	3.473	0.950186	1260.56	39.7653	1272.72	26.5224	1294.14	22.1521			13.845	1.03016	1.72691	2.84056	0.17348	2.64717	0.931921	1031.26	25.2277	1018.6	18.2675	992.36	20.9411			13.0672	1.26082	2.00252	2.98892
	13.5038	1.36627	1.83898	4.03963	0.180185	3.80156	0.941068	1067.99	37.4157	1059.49	26.5757	1042.9	27.5875			11.5523	1.11218	2.76151	2.82553	0.231475	2.59744	0.919274	1342.22	31.4735	1345.2	21.0657	1350.76	21.4611			13.7761	1.03368	1.70061	2.8318	0.169989	2.63639	0.930997	1012.05	24.6927	1008.76	18.1084	1002.49	20.9656			13.0049	1.54147	1.9581	3.42738
	13.4902	1.24493	1.82173	3.31736	0.178316	3.07491	0.926913	1057.77	29.9973	1053.31	21.7499	1044.96	25.1301			11.4598	1.05896	2.96931	2.62054	0.246899	2.39704	0.914714	1422.47	30.5975	1399.8	19.9075	1366.26	20.3899			13.7457	1.22731	1.71223	2.81682	0.170772	2.53539	0.900089	1016.36	23.8401	1013.12	18.058	1006.98	24.8807			12.9963	1.25192	2.02223	3.53125
	13.4856	1.20606	1.80978	3.01754	0.177086	2.76603	0.916653	1051.03	26.8258	1049	19.7374	1045.66	24.3442			11.3739	0.889903	2.8216	3.23724	0.23286	3.11253	0.961474	1349.47	37.898	1361.29	24.2738	1380.73	17.1011			13.7323	0.778175	1.78175	2.26654	0.177533	2.12877	0.939214	1053.48	20.6897	1038.82	14.7419	1008.95	15.7823			12.9938	1.37304	1.91558	3.35632
	13.4567	1.42379	1.80423	3.11975	0.176165	2.77591	0.889786	1045.99	26.8026	1046.99	20.3839	1049.99	28.7021			11.2245	1.32664	2.99878	3.34559	0.24423	3.07131	0.918019	1408.65	38.8638	1407.31	25.4806	1406.1	25.4043			13.7297	1.45198	1.75194	2.90221	0.174529	2.51288	0.865851	1037.02	24.0711	1027.88	18.7624	1009.35	29.447			12.981	1.06176	2.054	3.5918
	13.4442	1.05149	1.88489	3.35256	0.183869	3.1834	0.949542	1088.08	31.8727	1075.79	22.245	1051.86	21.2067			11.2086	0.954307	2.96293	2.89747	0.24097	2.73581	0.944205	1391.74	34.246	1398.17	22	1408.8	18.2672			13.6768	0.904079	1.6567	2.61402	0.164406	2.4527	0.938287	981.217	22.3244	992.117	16.5531	1017.16	18.3128			12.9553	0.925605	1.99893	3.27418
	13.418	1.20968	1.84711	3.56993	0.179833	3.35873	0.940839	1066.06	33.0023	1062.4	23.521	1055.79	24.3617			11.1376	1.11052	3.1254	3.23085	0.252572	3.03399	0.939071	1451.73	39.4385	1438.96	24.8584	1420.96	21.2225			13.6397	1.02223	1.71359	2.60068	0.16959	2.39136	0.919513	1009.85	22.3527	1013.63	16.6771	1022.67	20.6884			12.9248	1.05129	1.86492	3.12421
	13.3982	1.3627	1.70086	2.46667	0.165349	2.05609	0.833549	986.434	18.8065	1008.85	15.774	1058.76	27.45			11.1028	1.00572	3.08696	3.36984	0.248686	3.21626	0.954426	1431.7	41.2928	1429.46	25.8502	1426.94	19.204			13.6303	0.882009	1.79157	2.66268	0.177184	2.51235	0.943543	1051.57	24.3771	1042.39	17.353	1024.07	17.8467			12.9021	1.35239	2.04369	3.53375
	13.3817	1.08409	1.89825	2.66658	0.184312	2.43627	0.91363	1090.49	24.4418	1080.48	17.7356	1061.23	21.8138			11.0897	1.16824	2.99316	3.37724	0.240845	3.16875	0.938266	1391.09	39.6491	1405.88	25.7098	1429.19	22.3007			13.6279	1.06947	1.8065	2.59267	0.17863	2.36181	0.910958	1059.48	23.075	1047.81	16.9469	1024.42	21.6588			12.8615	1.1985	2.02122	3.5532
	13.3758	1.3495	1.73366	3.79364	0.168257	3.5455	0.93459	1002.5	32.9179	1021.11	24.4337	1062.12	27.1514			11.0686	1.18337	3.06932	2.81334	0.246502	2.55236	0.907233	1420.41	32.538	1425.07	21.5495	1432.84	22.5785			13.6166	0.878203	1.7661	2.67827	0.174491	2.5302	0.944713	1036.81	24.2325	1033.09	17.365	1026.09	17.7646			12.8505	1.00276	2.00445	2.65719
	13.3588	1.10426	1.81924	3.76908	0.176338	3.60369	0.956119	1046.94	34.8244	1052.41	24.7007	1064.68	22.2089			11.0358	1.25561	3.09934	3.00201	0.248177	2.72681	0.908329	1429.07	34.9513	1432.53	23.0501	1438.48	23.9387			13.599	0.833959	1.74926	2.37607	0.172604	2.2249	0.936382	1026.44	21.1121	1026.89	15.3518	1028.71	16.8829			12.8132	1.43293	2.07033	3.68062
	13.3521	0.870659	1.81067	3.3941	0.175418	3.28052	0.966538	1041.9	31.5608	1049.32	22.2051	1065.69	17.4893			11.0323	1.34073	3.16453	3.23676	0.253316	2.94602	0.910176	1455.55	38.3849	1448.55	24.9788	1439.09	25.5595			13.597	1.05808	1.7415	2.9999	0.171813	2.80711	0.935734	1022.09	26.5324	1024.02	19.3519	1029	21.4127			12.7957	1.00459	2.12554	2.73285
	13.3329	1.11933	1.78393	3.01824	0.172579	2.80302	0.928691	1026.31	26.5946	1039.61	19.6407	1068.59	22.4791			10.9565	0.959987	3.19637	2.70611	0.254106	2.53011	0.934962	1459.62	33.0477	1456.28	20.9324	1452.23	18.2682			13.5893	0.800385	1.76148	2.58075	0.173685	2.4535	0.950692	1032.38	23.4054	1031.39	16.7167	1030.16	16.2002			12.7951	1.27085	2.09449	3.42291
	13.3085	1.14794	1.73257	3.1985	0.167305	2.9854	0.933376	997.247	27.5835	1020.71	20.5947	1072.26	23.06			10.947	1.10062	3.0512	3.12451	0.242356	2.92424	0.935904	1398.93	36.7742	1420.54	23.8989	1453.88	20.9399			13.5849	1.01983	1.81205	2.51276	0.178614	2.2965	0.913934	1059.4	22.4352	1049.82	16.4424	1030.81	20.6329			12.7846	1.02493	2.14601	3.4679
	13.308	1.33817	1.84517	2.88347	0.178172	2.55416	0.885793	1056.98	24.9	1061.71	18.99	1072.34	26.8731			10.7873	0.969333	3.08266	3.13361	0.241283	2.97992	0.950954	1393.37	37.3409	1428.39	24.0292	1481.78	18.373			13.5651	0.789836	1.77679	2.38639	0.174882	2.2519	0.94364	1038.95	21.6082	1037.01	15.506	1033.76	15.9775			12.7681	1.03624	2.06081	3.74633
	13.2962	1.29758	1.83651	3.88755	0.177177	3.6646	0.942651	1051.54	35.5563	1058.61	25.5627	1074.12	26.0497			10.7801	1.25594	3.09439	3.46216	0.242039	3.22632	0.931882	1397.29	40.5305	1431.3	26.5743	1483.05	23.8017			13.5645	1.10941	1.6658	2.60905	0.163951	2.36143	0.905092	978.696	21.4425	995.587	16.5557	1033.85	22.4344			12.7537	1.2312	2.03353	3.4918
	13.2885	1.57674	1.87322	3.80724	0.180614	3.4654	0.910212	1070.33	34.1758	1071.67	25.2086	1075.29	31.669			10.7436	1.15951	3.37165	3.47421	0.262833	3.27501	0.942662	1504.32	43.9411	1497.83	27.2137	1489.47	21.9553			13.5569	0.783357	1.7616	2.15554	0.173283	2.00815	0.931627	1030.17	19.1192	1031.44	13.9624	1034.97	15.8438			12.7519	0.950153	1.7813	2.65256
	13.2732	1.04966	1.89133	3.65514	0.18215	3.50118	0.957879	1078.71	34.7771	1078.05	24.2821	1077.59	21.0563			10.6891	1.21123	3.27496	3.21888	0.254	2.9823	0.926502	1459.07	38.9414	1475.12	25.0436	1499.1	22.9037			13.556	0.834278	1.72944	2.61151	0.170107	2.47466	0.947599	1012.7	23.1918	1019.54	16.8032	1035.12	16.8726			12.7463	1.00554	2.09811	2.94128
	13.2644	1.22683	1.93679	2.74212	0.186405	2.45237	0.894333	1101.87	24.8388	1093.89	18.3643	1078.92	24.6102			10.6774	1.19963	3.37472	3.14881	0.261453	2.91134	0.924584	1497.27	38.8991	1498.55	24.6689	1501.16	22.678			13.5199	0.635154	1.85568	1.85459	0.182039	1.74244	0.939526	1078.1	17.2985	1065.45	12.2375	1040.5	12.8385			12.7292	1.20682	2.10928	3.49152
	13.2399	1.28414	1.92058	3.44064	0.184503	3.19202	0.92774	1091.53	32.052	1088.27	22.9777	1082.62	25.7382			10.4118	1.15005	3.05378	3.48196	0.230703	3.28655	0.94388	1338.18	39.7159	1421.18	26.6398	1548.63	21.606			13.4989	0.827179	1.79862	2.2339	0.176168	2.07511	0.928918	1046.01	20.0363	1044.96	14.5787	1043.63	16.7076			12.7288	1.50929	2.02885	4.0285
	13.232	1.18054	1.8765	3.01713	0.180161	2.77658	0.920272	1067.86	27.3244	1072.83	19.9877	1083.8	23.6668			10.1747	1.21198	3.82358	3.33698	0.282281	3.10911	0.931713	1602.84	44.1224	1597.72	26.8649	1591.78	22.6396			13.4631	1.04732	1.85688	2.65821	0.181391	2.44319	0.919112	1074.57	24.1825	1065.88	17.545	1049.02	21.1311			12.7217	1.11291	2.0936	3.90511
	13.2231	1.39071	1.81896	3.40416	0.174519	3.10713	0.912744	1036.96	29.762	1052.31	22.3072	1085.18	27.8643			10.0783	1.27844	3.75164	3.16931	0.274345	2.90002	0.915032	1562.82	40.2472	1582.46	25.4135	1609.54	23.8264			13.4588	0.8922	1.82923	2.48142	0.178633	2.31548	0.933125	1059.5	22.6227	1056	16.2918	1049.68	18.0036			12.7214	1.02771	2.12559	3.00774
	13.195	1.13576	1.91792	3.0329	0.183624	2.81221	0.927236	1086.74	28.1245	1087.35	20.2443	1089.43	22.7384			10.017	1.03977	3.79513	3.53371	0.275835	3.37728	0.955731	1570.35	47.0704	1591.72	28.4054	1620.91	19.3491			13.4508	0.728652	1.78541	2.5336	0.174251	2.42656	0.957752	1035.49	23.2126	1040.15	16.4913	1050.86	14.7036			12.6853	1.16893	2.08152	2.79266
	13.1589	0.864055	1.96611	3.62153	0.187722	3.51694	0.971121	1109.02	35.8334	1103.98	24.3796	1094.94	17.2796			10.0137	1.08157	3.90899	3.01056	0.284019	2.80957	0.933238	1611.57	40.0627	1615.54	24.3463	1621.51	20.1256			13.443	0.922139	1.82639	2.73301	0.178146	2.57274	0.941358	1056.84	25.0781	1054.98	17.934	1052.04	18.5997			12.6546	1.28607	2.06146	2.99735
	13.1557	1.16757	1.88271	3.05073	0.179715	2.81847	0.923865	1065.42	27.6784	1075.02	20.2337	1095.43	23.3729			10.004	0.991991	4.05888	2.83255	0.294623	2.65317	0.936671	1664.59	38.9235	1646.08	23.0799	1623.33	18.4541			13.4324	1.04519	1.84437	2.77609	0.179759	2.57182	0.926418	1065.66	25.2615	1061.42	18.2799	1053.62	21.0734			12.6545	1.10822	2.14438	3.39186
	13.1441	1.40676	1.7795	3.59781	0.169713	3.31138	0.920389	1010.53	30.9718	1038	23.3925	1097.17	28.1403			9.97156	1.2024	3.91733	2.76535	0.283427	2.49025	0.900522	1608.6	35.4516	1617.27	22.3723	1629.36	22.3517			13.4271	0.976732	1.76447	3.02365	0.171903	2.86155	0.946388	1022.59	27.0591	1032.49	19.5982	1054.42	19.692			12.6384	1.17307	2.18867	3.175
	13.1306	1.19267	2.04404	3.13298	0.194742	2.89708	0.924706	1147.01	30.4416	1130.31	21.3644	1099.22	23.8612			9.95597	1.13519	3.93802	2.19159	0.284478	1.87468	0.855395	1613.88	26.7652	1621.53	17.7484	1632.27	21.0942			13.4128	0.91493	1.86273	2.56914	0.181283	2.40071	0.934439	1073.98	23.75	1067.95	16.9757	1056.56	18.4412			12.6262	1.05603	2.07535	3.28952
	13.1139	1.27503	2.01955	3.29999	0.192164	3.04372	0.922342	1133.09	31.6273	1122.11	22.4143	1101.8	25.4823			9.91134	1.22213	4.10346	3.31524	0.295101	3.08176	0.929573	1666.97	45.2679	1654.99	27.0728	1640.61	22.6838			13.4097	0.998857	1.82579	2.79321	0.177647	2.60851	0.933874	1054.11	25.3662	1054.77	18.327	1057.03	20.1303			12.6176	1.19665	2.13364	3.84447
	13.1021	1.57408	1.82411	3.8864	0.173412	3.55336	0.914307	1030.88	33.8524	1054.16	25.494	1103.59	31.4549			9.88433	1.11444	4.09227	3.09976	0.293494	2.89249	0.933135	1658.97	42.3089	1652.76	25.2988	1645.68	20.6729			13.3922	1.05651	1.75462	2.76906	0.170499	2.55958	0.924351	1014.86	24.0348	1028.87	17.9113	1059.66	21.2811			12.6064	1.34801	2.1362	3.40715
	13.0936	1.47079	1.88241	4.46892	0.17884	4.21995	0.944289	1060.63	41.2706	1074.91	29.6425	1104.85	29.3849			9.77015	1.07592	4.32877	3.35381	0.306869	3.17654	0.947145	1725.28	48.0842	1698.86	27.6702	1667.2	19.9033			13.3851	1.04455	1.84566	2.66164	0.179251	2.44811	0.919775	1062.88	23.9886	1061.88	17.5303	1060.73	21.0379			12.5726	0.899646	2.29723	2.4912
	13.0341	1.27481	2.00661	3.40539	0.189771	3.15777	0.927287	1120.13	32.469	1117.75	23.0811	1113.96	25.4449			9.725	1.18028	4.14676	3.39815	0.292608	3.18659	0.937743	1654.55	46.502	1663.57	27.8071	1675.76	21.8104			13.3719	1.00363	1.86915	2.37946	0.181352	2.15744	0.906694	1074.36	21.3502	1070.23	15.741	1062.72	20.1905			12.5723	1.09394	2.26121	3.36876
	13.0102	1.47693	2.05037	3.33246	0.193555	2.9873	0.896425	1140.6	31.2292	1132.42	22.7482	1117.65	29.4597			9.70719	1.23628	4.16744	3.12596	0.293529	2.87111	0.918472	1659.14	41.9999	1667.64	25.6035	1679.15	22.8355			13.3418	0.966353	1.85754	2.7186	0.17982	2.54105	0.934691	1065.99	24.9664	1066.11	17.9459	1067.25	19.4178			12.5464	1.17285	1.94101	3.20519
	12.9928	1.07157	2.02564	3.09158	0.190965	2.89993	0.93801	1126.6	29.9753	1124.15	21.0193	1120.32	21.3803			9.65107	1.21914	3.35563	3.13665	0.234983	2.89004	0.921375	1360.56	35.4488	1494.1	24.5417	1689.85	22.4883			13.273	1.10969	1.73233	3.82966	0.166836	3.66536	0.957099	994.653	33.7846	1020.62	24.6589	1077.6	22.2626			12.5385	1.31229	2.22554	3.39156
	12.9659	1.11617	2.10539	3.01222	0.198072	2.7978	0.928814	1164.95	29.8179	1150.57	20.7393	1124.46	22.2376			9.62123	1.10423	4.22983	3.30992	0.295285	3.1203	0.94271	1667.89	45.8562	1679.83	27.1886	1695.56	20.3537			13.2673	0.757931	1.80137	2.85519	0.173411	2.75276	0.964123	1030.88	26.2249	1045.96	18.6443	1078.45	15.211			12.5193	1.01045	2.21477	2.52428
	12.9577	1.06933	2.05068	3.51557	0.192804	3.34899	0.952618	1136.55	34.8966	1132.52	23.9998	1125.71	21.3125			9.47979	1.04541	4.38771	2.7454	0.301804	2.53857	0.924664	1700.25	37.9395	1710.03	22.7061	1722.81	19.2031			13.2475	0.941153	1.81657	2.65088	0.174613	2.47818	0.934853	1037.48	23.7484	1051.45	17.3618	1081.48	18.8702			12.5179	1.17977	2.18167	3.61093
	12.95	1.06077	2.02642	2.99341	0.190408	2.79915	0.935105	1123.59	28.8627	1124.42	20.3542	1126.87	21.1386			9.44629	1.17559	4.51104	2.93219	0.30919	2.68621	0.916111	1736.72	40.8966	1733.01	24.3752	1729.31	21.5772			13.2227	1.04062	1.83547	2.81531	0.176099	2.61592	0.929179	1045.63	25.2498	1058.24	18.5066	1085.21	20.8551			12.4052	1.14001	2.24112	3.32888
	12.9414	1.00345	2.03186	3.2292	0.190793	3.06933	0.950494	1125.67	31.7023	1126.24	21.9774	1128.22	19.998			9.34901	1.14564	3.89729	3.693	0.264372	3.51081	0.950665	1512.17	47.3232	1613.12	29.8498	1748.29	20.9777			13.182	0.809235	1.67508	2.67993	0.160216	2.55483	0.95332	957.978	22.7431	999.117	17.0409	1091.38	16.1949			12.3321	1.05467	2.32424	3.10658
	12.9244	1.17149	2.02168	2.87298	0.189587	2.62328	0.913088	1119.14	26.9512	1122.82	19.52	1130.81	23.3187			9.30157	1.04468	4.53152	3.02938	0.305835	2.84355	0.938657	1720.18	42.9323	1736.77	25.2041	1757.6	19.1067			13.1013	1.61486	1.81961	3.34211	0.172974	2.92607	0.875517	1028.48	27.8163	1052.54	21.9032	1103.67	32.2888			12.3154	1.30514	2.23635	3.41662
	12.8524	1.1598	2.03362	3.66579	0.189646	3.47748	0.948631	1119.46	35.7366	1126.83	24.9571	1141.95	23.0398			9.16508	1.01785	4.94756	2.84324	0.329014	2.65481	0.933726	1833.6	42.3685	1810.41	24.0202	1784.59	18.5536			13.099	1.13904	1.89741	2.90148	0.180338	2.66855	0.919721	1068.82	26.2831	1080.18	19.2953	1104.03	22.7658			12.1647	1.01315	2.23419	2.97346
	12.8497	1.21895	2.11414	3.43426	0.197113	3.21066	0.93489	1159.79	34.0798	1153.43	23.6776	1142.34	24.215			9.12682	1.18479	4.71206	3.57739	0.312046	3.3755	0.943565	1750.77	51.7529	1769.39	29.9737	1792.21	21.5769			13.0888	1.05704	1.98857	2.35159	0.188855	2.10063	0.893281	1115.17	21.5114	1111.64	15.8893	1105.62	21.1094			12.1121	1.02177	2.37373	3.11749
	12.8083	1.2877	1.9943	3.10404	0.185341	2.82434	0.909891	1096.09	28.4686	1113.58	20.9949	1148.78	25.5887			9.07446	1.28308	5.0756	3.31166	0.334192	3.053	0.921893	1858.67	49.2981	1832.04	28.0986	1802.68	23.3354			13.0359	1.06596	1.9703	2.84738	0.186364	2.64032	0.927282	1101.65	26.7375	1105.41	19.1805	1113.68	21.2815			11.923	1.30902	2.41901	3.34379
	12.7536	1.02241	2.0855	3.19457	0.192988	3.02655	0.947402	1137.54	31.562	1144.05	21.9278	1157.24	20.2813			9.05031	0.935251	4.62683	2.71989	0.303833	2.55403	0.939022	1710.29	38.3675	1754.12	22.7129	1807.53	16.9997			13.027	1.16297	1.87982	2.81682	0.177683	2.56554	0.910792	1054.31	24.9527	1074	18.6719	1115.04	23.2336			11.8702	1.0888	2.54512	3.27834
	12.7479	0.922277	2.10725	3.34881	0.194914	3.21931	0.961329	1147.94	33.8525	1151.18	23.0641	1158.13	18.3011			8.99351	1.36562	4.892	3.30029	0.31923	3.0045	0.910373	1785.97	46.8685	1800.88	27.8301	1818.96	24.7892			13.0179	1.02655	1.99711	2.72734	0.188639	2.52677	0.92646	1114	25.8503	1114.53	18.4551	1116.47	20.4957			11.835	1.30046	2.43363	3.08634
	12.7342	1.10208	2.09818	3.96205	0.193867	3.80569	0.960535	1142.29	39.8387	1148.21	27.2515	1160.26	21.853			8.97536	1.12755	4.79683	3.47803	0.312388	3.29018	0.945991	1752.45	50.4869	1784.34	29.2312	1822.63	20.4578			12.9892	0.906064	1.92758	2.92996	0.18167	2.78634	0.950984	1076.09	27.6148	1090.7	19.5907	1120.87	18.0811			11.6417	1.31959	2.78831	3.28623
	12.731	0.759318	2.08861	2.93331	0.192933	2.83333	0.965915	1137.25	29.5399	1145.07	20.1437	1160.76	15.0538			8.30737	1.21735	5.97463	3.0915	0.360133	2.84173	0.919207	1982.8	48.5055	1972.16	26.8962	1961.77	21.7228			12.9528	1.16955	2.0888	3.00431	0.196312	2.76731	0.921114	1155.48	29.274	1145.13	20.632	1126.47	23.3064			11.6343	1.1606	2.62977	3.24293
	12.7158	1.03693	2.04621	3.09063	0.18879	2.91149	0.942037	1114.82	29.8065	1131.03	21.0828	1163.14	20.555			8.13803	1.43483	5.96582	3.32846	0.352271	3.00332	0.902314	1945.44	50.4362	1970.87	28.9527	1998.44	25.495			12.9053	0.805452	2.03611	2.63655	0.190659	2.5105	0.952194	1124.94	25.915	1127.66	17.9554	1133.75	16.0159			11.6313	1.16868	2.82002	3.44874
	12.6547	1.65182	2.13411	3.05563	0.195955	2.57067	0.84129	1153.56	27.1525	1159.92	21.1298	1172.7	32.6772			7.61169	1.05599	6.81597	2.52515	0.376441	2.29374	0.908359	2059.64	40.4396	2087.8	22.3631	2116.43	18.5118			12.8381	1.03611	2.09107	2.76921	0.194786	2.56807	0.927367	1147.25	26.9896	1145.88	19.0238	1144.12	20.5848			11.624	1.24324	2.6947	3.82903
	12.6422	1.32909	1.88252	3.58966	0.172683	3.33454	0.92893	1026.88	31.6539	1074.95	23.8084	1174.66	26.3172			7.59932	1.3943	6.87992	3.05768	0.379355	2.72127	0.88998	2073.27	48.2467	2096.07	27.1135	2119.28	24.4357			12.767	0.947329	2.11117	2.2639	0.195569	2.05617	0.90824	1151.47	21.6822	1152.46	15.5999	1155.16	18.7975			11.5337	1.28713	2.85557	3.1909
	12.6218	1.32587	2.11492	3.20361	0.193688	2.91637	0.910337	1141.32	30.5053	1153.68	22.0895	1177.85	26.2229			7.59865	0.999158	6.97048	2.632	0.384315	2.43497	0.925143	2096.41	43.5784	2107.68	23.376	2119.44	17.5094			12.7279	1.29164	1.90035	3.23851	0.175501	2.96979	0.917022	1042.35	28.5826	1081.21	21.5488	1161.24	25.6275			11.5314	1.39813	2.35562	3.69084
	12.6171	0.924774	2.23099	2.96889	0.204242	2.82118	0.95025	1198.07	30.8449	1190.83	20.8183	1178.59	18.3063			7.56915	1.30519	7.00865	2.66933	0.384919	2.32847	0.872307	2099.22	41.7197	2112.53	23.7239	2126.25	22.8537			12.7198	0.831541	2.0916	2.25993	0.19304	2.10138	0.929846	1137.82	21.9189	1146.05	15.5258	1162.5	16.4825			11.5156	1.19426	2.76122	3.55054
	12.6167	1.00591	2.22461	3.00773	0.203651	2.83453	0.942416	1194.91	30.9164	1188.82	21.0721	1178.66	19.9034			7.373	1.18532	7.16181	3.56511	0.383138	3.36229	0.943111	2090.93	60.0421	2131.76	31.7747	2172.11	20.6512			12.681	1.13639	2.22065	2.35298	0.204325	2.06038	0.875644	1198.52	22.5344	1187.58	16.4749	1168.56	22.4879			11.5088	0.956019	2.66055	2.85061
	12.6137	1.18331	2.15236	2.8598	0.196991	2.6035	0.91038	1159.13	27.6206	1165.81	19.8289	1179.12	23.3984			5.68521	1.17095	10.8194	3.81675	0.446308	3.63269	0.951777	2378.82	72.2668	2507.73	35.4901	2614.53	19.4913			12.6506	0.913334	2.15759	2.35323	0.198047	2.16875	0.921609	1164.82	23.1113	1167.5	16.3284	1173.35	18.0899			11.4765	1.2067	2.75209	3.55393
	12.5807	1.15388	2.14613	3.39274	0.195907	3.19049	0.940389	1153.29	33.6924	1163.8	23.5037	1184.3	22.8184			5.65895	1.4063	12.0471	3.09021	0.494659	2.75167	0.890449	2590.8	58.7071	2608.08	28.9804	2622.23	23.3925			12.646	0.887475	2.22519	2.64193	0.204178	2.48841	0.941891	1197.72	27.1995	1189.01	18.5102	1174.07	17.5689			11.4726	0.913386	2.80481	2.68906
	12.5475	1.763	2.18229	3.24876	0.198682	2.72878	0.839947	1168.23	29.1571	1175.41	22.6252	1189.52	34.8104			5.60557	1.22655	12.6396	2.65299	0.514093	2.35243	0.88671	2674.08	51.4912	2653.17	24.968	2637.98	20.371			12.5946	0.816873	2.2646	3.28699	0.20695	3.18387	0.968628	1212.55	35.1928	1201.34	23.1561	1182.12	16.1543			11.4712	1.07961	2.73888	3.22918
	12.521	1.05882	2.19567	3.20219	0.199477	3.02208	0.943752	1172.51	32.3987	1179.67	22.3436	1193.69	20.8744			5.4909	1.06195	12.7723	2.90212	0.508863	2.70084	0.930645	2651.77	58.7192	2663	27.3346	2672.25	17.5792			12.4794	0.886659	2.18049	3.00026	0.19744	2.86625	0.955334	1161.55	30.466	1174.83	20.8886	1200.23	17.4607			11.4645	1.02848	2.80569	3.29567
	12.4737	1.07379	2.35378	3.85043	0.213034	3.69767	0.960327	1244.96	41.8628	1228.7	27.4458	1201.14	21.1474			5.47935	1.13306	12.8191	3.18152	0.509651	2.97292	0.934434	2655.14	64.7012	2666.44	29.9756	2675.74	18.7505			12.4533	0.851159	2.20265	2.63709	0.199029	2.49595	0.946479	1170.1	26.7082	1181.88	18.4179	1204.35	16.7608			11.3753	1.41719	2.82223	2.70391
	12.456	1.23092	2.18019	3.0714	0.197043	2.81396	0.91618	1159.42	29.8601	1174.74	21.3832	1203.91	24.2339			5.43233	1.1335	13.3564	3.6362	0.526457	3.45501	0.950172	2726.51	76.8187	2705.18	34.3627	2689.99	18.7327			12.4426	0.974518	2.24844	2.95258	0.202993	2.78712	0.943961	1191.38	30.3177	1196.3	20.7539	1206.04	19.1766			11.3087	1.38942	2.56484	3.35632
	12.4511	1.29657	2.26963	2.51353	0.205045	2.15331	0.856688	1202.36	23.6195	1202.9	17.718	1204.7	25.5444			5.42286	1.1526	13.0511	2.97882	0.513527	2.74679	0.922109	2671.67	60.08	2683.35	28.101	2692.87	19.0433			12.4117	0.953686	2.33397	2.3658	0.210191	2.16506	0.91515	1229.84	24.241	1222.69	16.8182	1210.93	18.7841			11.2364	1.1505	2.80374	3.02241
	12.3853	1.07441	2.34504	2.82845	0.210739	2.61644	0.925044	1232.75	29.358	1226.05	20.1365	1215.16	21.1338			5.34772	1.06496	13.4597	2.41585	0.522268	2.16845	0.897594	2708.79	47.9598	2712.46	22.8375	2715.9	17.5604			12.3092	0.867344	2.1404	2.33697	0.191167	2.17006	0.928577	1127.69	22.4508	1161.95	16.1745	1227.24	17.0134			11.1873	0.961218	3.07634	2.93794
	12.3331	1.68892	1.98737	4.00393	0.177843	3.63029	0.906681	1055.18	35.3357	1111.23	27.0526	1223.43	33.1878			5.18441	1.02171	14.808	3.62263	0.557035	3.47557	0.959404	2854.37	80.1587	2802.98	34.4699	2766.92	16.7645			12.2257	0.922684	2.32786	2.33096	0.206499	2.14056	0.91832	1210.14	23.6178	1220.82	16.5575	1240.6	18.1027			11.1609	0.721851	2.69173	2.74464
	12.2829	1.28092	2.37044	3.15918	0.211259	2.88784	0.914113	1235.52	32.4694	1233.73	22.5641	1231.48	25.138																		12.2198	0.785983	2.28365	2.61706	0.202479	2.49624	0.953835	1188.62	27.0963	1207.24	18.4826	1241.55	15.4206			11.083	1.12021	3.09959	3.28485
	12.2294	0.964888	2.40499	2.71481	0.213405	2.53756	0.934708	1246.93	28.7698	1244.09	19.4724	1240.01	18.9191																		12.1631	0.965348	2.41323	2.94641	0.212977	2.78378	0.944804	1244.66	31.5091	1246.54	21.1553	1250.68	18.8887			11.0065	1.16121	2.73197	3.25153
	12.2176	1.09814	2.33034	3.32997	0.206582	3.1437	0.94406	1210.58	34.6975	1221.58	23.6636	1241.93	21.5019																		12.012	0.877089	2.56618	2.53741	0.22366	2.381	0.938359	1301.19	28.0549	1291.05	18.5418	1275.07	17.0872			11.0006	1.05618	3.05681	3.18404
	12.198	0.984918	2.37103	3.30454	0.209851	3.15435	0.95455	1228.03	35.2705	1233.91	23.6044	1245.04	19.3099																		11.9246	1.12376	2.31195	3.15546	0.200037	2.94858	0.934436	1175.52	31.6848	1215.96	22.3696	1289.29	21.8554			10.9599	1.31181	3.1534	3.54091
	12.1761	1.12047	2.37315	2.97514	0.209662	2.75608	0.926372	1227.02	30.7942	1234.55	21.2564	1248.58	21.9399																		11.8367	0.945513	2.05499	3.01053	0.176494	2.8582	0.9494	1047.79	27.6409	1133.96	20.5652	1303.67	18.3664			10.9484	1.192	3.21573	3.31375
	12.1342	1.27878	2.12285	2.9176	0.186903	2.62242	0.898829	1104.58	26.621	1156.26	20.141	1255.31	24.9927																		11.8019	0.859181	2.62413	2.35784	0.22471	2.19572	0.931245	1306.72	25.9709	1307.42	17.3367	1309.4	16.6744			10.8994	0.957771	3.23153	3.04727
	12.0547	1.17376	2.42843	2.8143	0.212408	2.55784	0.908874	1241.63	28.888	1251.05	20.2436	1268.17	22.9147																		11.72	0.898058	2.40537	2.57541	0.204549	2.41376	0.937232	1199.71	26.4233	1244.2	18.4732	1322.89	17.3959			10.8059	0.958793	3.21858	3.16266
	12.0542	0.964191	2.43111	3.49765	0.212633	3.36212	0.961253	1242.83	38.0047	1251.85	25.1689	1268.24	18.8045																		11.6712	0.909586	2.63271	2.68648	0.222949	2.52781	0.940938	1297.44	29.7073	1309.82	19.7715	1330.98	17.6004			10.7548	0.960125	3.30168	2.81291
	12.0533	1.50887	2.43074	2.98376	0.212584	2.57413	0.862713	1242.57	29.0918	1251.74	21.4689	1268.4	29.4473																		11.3738	1.07786	2.94407	2.5368	0.242963	2.29643	0.905245	1402.08	28.9371	1393.32	19.2297	1380.76	20.7127			10.7314	1.21489	3.31693	3.90596
	12.0376	1.08513	2.37176	3.22435	0.207156	3.03627	0.941668	1213.65	33.589	1234.13	23.0336	1270.92	21.1569																		11.2663	0.962676	2.72716	2.36676	0.222937	2.16213	0.91354	1297.37	25.4085	1335.89	17.5857	1398.97	18.4521			10.7142	1.20491	3.28615	3.30475
	11.8635	1.7462	2.2903	4.08257	0.197149	3.69028	0.903911	1159.99	39.1768	1209.3	28.8627	1299.28	33.9408																		11.1179	0.793282	3.06125	3.19921	0.246951	3.09929	0.96877	1422.73	39.5683	1423.05	24.4904	1424.34	15.1528			10.7011	1.15356	3.27923	3.19898
	11.8419	1.14447	2.55514	3.23859	0.219545	3.02963	0.935478	1279.47	35.1591	1287.91	23.6386	1302.83	22.2326																		11.1161	1.17225	3.17251	2.31474	0.255884	1.99596	0.862281	1468.75	26.216	1450.49	17.8724	1424.65	22.3912			10.6197	1.14959	3.20032	3.42093
	11.8207	2.19413	2.41887	9.10093	0.207463	8.83248	0.970503	1215.29	97.8366	1248.22	65.4706	1306.31	42.5891																		11.053	0.906637	3.0863	2.48174	0.247517	2.3102	0.930881	1425.66	29.5482	1429.29	19.0347	1435.52	17.2919			10.5615	0.960101	3.23452	3.14678
	11.7719	1.19507	2.67666	3.56837	0.228628	3.3623	0.942251	1327.3	40.3338	1322.03	26.3838	1314.33	23.1785																		10.9927	0.863609	3.01728	2.20861	0.240663	2.03277	0.920382	1390.14	25.4192	1412	16.845	1445.94	16.4481			10.5011	1.37025	3.38312	3.48552
	11.7519	1.18635	2.67527	3.17199	0.228121	2.94178	0.927425	1324.64	35.2255	1321.65	23.4486	1317.63	22.9986																		10.9569	0.905053	3.03513	2.19317	0.241298	1.99772	0.910881	1393.44	25.0342	1416.5	16.7518	1452.15	17.223			10.3285	1.07463	2.99483	3.62847
	11.6435	1.14436	2.67704	3.00702	0.226167	2.78075	0.924755	1314.38	33.0646	1322.14	22.2327	1335.57	22.1287																		10.949	0.779522	3.18677	2.72511	0.253172	2.61124	0.958214	1454.81	34.0074	1453.96	21.0643	1453.52	14.8313			10.2936	0.970569	3.57509	3.06226
	11.5624	1.14883	2.74811	3.25779	0.230552	3.04851	0.935759	1337.39	36.8196	1341.58	24.2581	1349.08	22.1747																		10.9411	0.83901	3.11993	2.46607	0.247682	2.31896	0.940345	1426.51	29.6759	1437.62	18.9645	1454.9	15.9602			10.1568	1.01014	3.7616	3.1012
	11.5353	0.891503	2.93066	2.51552	0.245291	2.35224	0.935093	1414.14	29.8685	1389.86	19.0462	1353.61	17.1966																		10.8655	1.01887	3.17696	2.41999	0.250466	2.19505	0.90705	1440.88	28.3428	1451.57	18.6915	1468.08	19.3475			9.98832	1.28166	3.90958	2.61102
	11.3929	1.15748	2.97138	2.76611	0.24563	2.51229	0.908239	1415.9	31.9362	1400.33	21.0173	1377.52	22.2526																		10.8514	0.880173	3.21872	2.71473	0.253429	2.56809	0.945982	1456.14	33.4726	1461.68	21.034	1470.55	16.7081			9.95764	1.13373	3.69476	3.38879
	11.3274	1.22589	2.80133	3.70407	0.230241	3.49533	0.943646	1335.76	42.1702	1355.89	27.7234	1388.6	23.5323																		10.8296	1.05691	3.1603	2.90313	0.248329	2.70391	0.931377	1429.85	34.6747	1447.52	22.396	1474.37	20.0529			9.90715	0.964856	3.90298	3.31038
	11.3009	1.32647	2.75585	3.09012	0.225972	2.79094	0.903181	1313.35	33.1625	1343.67	23.0265	1393.1	25.4459																		10.8017	0.831078	3.00799	2.20061	0.235752	2.03764	0.925945	1364.57	25.0595	1409.65	16.7711	1479.25	15.7577			9.8916	1.05468	4.00937	3.56278
	11.2234	0.874762	3.05277	2.74543	0.248602	2.60234	0.947881	1431.26	33.4016	1420.93	21.0012	1406.29	16.7502																		10.7514	1.10118	3.29387	2.66384	0.256957	2.42558	0.910558	1474.26	31.9652	1479.6	20.7518	1488.09	20.8545			9.87577	1.00454	3.86313	3.41521
	11.2043	1.00762	3.03846	2.79399	0.247016	2.60597	0.932706	1423.07	33.2771	1417.34	21.348	1409.54	19.2859																		10.728	0.947199	3.29916	2.77706	0.256809	2.61054	0.940035	1473.49	34.3869	1480.85	21.6422	1492.22	17.9284			9.8718	1.1741	4.06102	3.12847
	11.1882	1.25769	2.99533	3.79981	0.243161	3.58563	0.943635	1403.11	45.2124	1406.43	28.9335	1412.3	24.0635																		10.6982	0.955438	2.92554	3.79994	0.227094	3.67786	0.967874	1319.25	43.8781	1388.54	28.7626	1497.48	18.0717			9.8671	1.20114	4.04032	3.15982
	11.1577	1.17417	3.03907	2.90259	0.246038	2.65449	0.914527	1418.01	33.7889	1417.49	22.1791	1417.52	22.4494																		10.6832	0.761931	3.24137	2.85979	0.251258	2.75642	0.963855	1444.96	35.6814	1467.11	22.1951	1500.13	14.4063			9.86391	1.17765	4.07909	2.85727
	11.116	1.03723	2.9102	2.61857	0.234724	2.40439	0.918206	1359.21	29.4655	1384.56	19.7913	1424.67	19.8118																		10.6714	0.838528	3.40582	2.70242	0.263713	2.56903	0.950643	1508.81	34.5601	1505.74	21.2149	1502.23	15.8502			9.83204	1.16838	3.94471	3.35782
	11.1122	0.816553	3.07904	2.81185	0.248258	2.69067	0.956906	1429.49	34.4971	1427.49	21.5548	1425.32	15.5952																		10.6387	0.947647	3.42416	2.58106	0.26432	2.4008	0.93016	1511.91	32.3558	1509.96	20.2866	1508.03	17.8976			9.80974	1.08047	3.97016	3.78726
	11.1079	1.09992	3.00789	3.3621	0.242427	3.17709	0.944972	1399.3	39.9634	1409.62	25.6259	1426.07	21.0053																		10.6271	0.810727	3.32138	2.71949	0.256108	2.59583	0.954529	1469.9	34.1189	1486.09	21.2264	1510.08	15.3072			9.79472	1.16477	3.9827	3.31058
	11.0759	0.996642	3.09445	3.08859	0.248686	2.92337	0.946506	1431.7	37.5323	1431.32	23.7059	1431.56	19.0188																		10.5983	1.07868	3.32203	2.96949	0.255463	2.76664	0.93169	1466.59	36.2911	1486.24	23.1794	1515.21	20.3532			9.67267	1.30186	4.35206	3.53869
	11.0319	1.20258	3.09799	3.35568	0.24798	3.13279	0.933578	1428.05	40.1295	1432.19	25.764	1439.17	22.9254																		10.4398	1.0704	3.54891	3.2009	0.26883	3.01662	0.942429	1534.86	41.202	1538.19	25.3618	1543.58	20.1229			9.61214	1.09974	4.39674	3.60805
	11.0103	0.948778	3.03088	3.51414	0.242135	3.38363	0.962863	1397.79	42.5203	1415.43	26.8361	1442.89	18.0777																		10.4045	0.713791	3.44124	2.54585	0.259791	2.44374	0.959891	1488.77	32.4865	1513.87	20.0323	1549.95	13.4074			9.58942	1.26095	4.41327	3.41266
	10.9744	1.0639	3.27554	3.55489	0.260826	3.39195	0.954166	1494.06	45.2346	1475.26	27.6602	1449.12	20.2542																		10.3864	1.02449	3.23787	2.87084	0.244013	2.68181	0.934157	1407.53	33.9109	1466.28	22.2751	1553.22	19.2353			9.57685	1.0063	4.19458	3.18336
	10.9671	1.19483	3.33199	2.83469	0.265145	2.57058	0.906827	1516.11	34.7293	1488.58	22.1422	1450.38	22.7432																		10.1478	0.948273	3.38385	3.35999	0.249156	3.2234	0.959348	1434.12	41.447	1500.66	26.3403	1596.72	17.7033			9.57396	1.23647	4.36663	3.683
	10.9601	1.05838	3.08699	2.85858	0.245491	2.65543	0.928933	1415.18	33.7406	1429.47	21.927	1451.61	20.1424																		10.0989	0.700471	4.00284	2.1403	0.293313	2.02243	0.944928	1658.06	29.5679	1634.77	17.3899	1605.74	13.0616			9.51905	1.07877	4.39942	3.10291
	10.949	0.796487	3.05982	2.28061	0.243086	2.13701	0.937032	1402.72	26.9392	1422.69	17.4547	1453.52	15.1541																		10.0989	1.00619	3.69284	2.70466	0.270596	2.51053	0.928225	1543.82	34.4668	1569.82	21.6138	1605.74	18.7609			9.48779	1.11157	4.41664	3.53972
	10.9456	1.25823	3.2325	4.17945	0.256724	3.98556	0.953608	1473.06	52.486	1464.99	32.4219	1454.12	23.938																		10.0941	0.695085	3.94528	2.42106	0.288957	2.31913	0.957901	1636.31	33.5152	1623.02	19.6144	1606.63	12.9597			9.45942	0.928814	4.30184	2.9029
	10.9247	1.24401	3.13627	3.36698	0.248605	3.12874	0.929242	1431.28	40.1585	1441.64	25.9281	1457.76	23.6557																		10.0378	0.699242	4.01431	2.34981	0.292374	2.24336	0.954699	1653.38	32.7168	1637.1	19.1035	1617.04	13.018			9.42894	1.35722	4.37622	3.57213
	10.9085	1.26918	3.10233	3.19045	0.245551	2.92715	0.91747	1415.49	37.2004	1433.27	24.5033	1460.57	24.1254																		10.0272	0.665966	3.86725	2.30743	0.281364	2.20923	0.957444	1598.23	31.2723	1606.87	18.6177	1619.01	12.3952			9.39752	1.17874	4.43859	3.89135
	10.8893	1.53367	3.15395	3.12638	0.249197	2.72435	0.871408	1434.33	35.0346	1445.96	24.1072	1463.92	29.1404																		10.0185	0.993954	3.92092	2.30145	0.285023	2.07575	0.901931	1616.61	29.6801	1618.01	18.6218	1620.62	18.4971			9.38217	1.35535	4.4483	3.56502
	10.8038	1.09244	3.25875	2.91336	0.255455	2.70078	0.927034	1466.55	35.4262	1471.26	22.6394	1478.89	20.7146																		9.9976	0.915712	3.91495	2.67238	0.283994	2.51059	0.93946	1611.45	35.7969	1616.78	21.6172	1624.51	17.0323			9.31941	1.10474	4.69388	2.57169
	10.7228	1.09933	3.22581	3.37328	0.250978	3.18912	0.945406	1443.52	41.246	1463.38	26.1522	1493.14	20.8056																		9.95186	1.02273	3.27524	2.73706	0.236502	2.53881	0.927566	1368.49	31.3034	1475.19	21.2942	1633.04	19.0022			9.3108	1.16303	4.47949	3.15562
	10.6472	0.836469	3.32911	2.85146	0.257188	2.72601	0.956006	1475.44	35.9502	1487.9	22.2688	1506.52	15.8007																		9.93348	1.87955	1.19021	2.78961	0.0857855	2.06136	0.738943	530.564	10.4989	796.059	15.3938	1636.47	34.9084			9.23917	0.988919	4.41977	2.76767
	10.4667	1.0047	3.40105	2.80644	0.258292	2.62043	0.933723	1481.1	34.6757	1504.64	22.0247	1538.75	18.8997																		9.9184	0.915874	3.86001	2.74802	0.277791	2.59091	0.942826	1580.23	36.3106	1605.36	22.1651	1639.29	17.0046			9.16853	0.994845	4.76974	3.45244
	10.3779	1.08284	3.66718	3.22504	0.276139	3.03782	0.941948	1571.89	42.3756	1564.25	25.7357	1554.77	20.3251																		9.75265	0.875856	3.92328	2.78721	0.277626	2.64601	0.949343	1579.4	37.0657	1618.5	22.5562	1670.51	16.1951			9.10986	1.00052	4.72492	2.74866
	10.3579	1.01379	3.50408	3.23266	0.26335	3.06958	0.949552	1506.96	41.2489	1528.13	25.5417	1558.38	19.0199																		9.72347	0.72631	4.09819	2.32374	0.289135	2.20732	0.949898	1637.21	31.9146	1653.94	18.969	1676.05	13.4201			9.03707	1.04265	4.81469	3.57983
	10.3268	1.23893	3.81645	3.33426	0.285965	3.09553	0.928403	1621.33	44.3755	1596.22	26.8326	1564.02	23.2272																		9.63411	0.950521	4.29078	2.61828	0.299941	2.43965	0.931777	1691.02	36.288	1691.59	21.5639	1693.1	17.5255			8.94755	0.926726	4.83267	3.36438
	10.0441	1.04462	3.84477	2.99626	0.2802	2.80826	0.937257	1592.37	39.6234	1602.17	24.1484	1615.88	19.452																		9.54167	1.00708	4.05129	2.71967	0.280482	2.52633	0.928913	1593.79	35.6735	1644.56	22.1516	1710.85	18.527			8.85741	1.27944	4.93037	3.62111
	10.0325	1.001	3.75477	2.96774	0.273326	2.79383	0.9414	1557.66	38.6602	1583.13	23.8007	1618.03	18.6344																		9.49777	1.05575	4.52571	2.66478	0.311886	2.44672	0.918171	1749.98	37.498	1735.71	22.1645	1719.33	19.4016			8.68692	0.859536	5.26678	3.25194
	10.0195	1.08171	3.91629	2.83291	0.284715	2.61826	0.924229	1615.06	37.4058	1617.05	22.9178	1620.44	20.131																		9.44662	0.82301	4.56531	2.30342	0.312921	2.15137	0.93399	1755.06	33.0547	1742.96	19.1883	1729.25	15.1052			8.66984	1.29362	5.32109	3.06744
	10.0154	1.2207	3.99999	3.09566	0.29068	2.84482	0.918971	1644.93	41.3024	1634.19	25.1514	1621.2	22.7157																		9.33156	0.843354	3.59543	2.38223	0.24344	2.22795	0.935238	1404.56	28.1187	1548.52	18.9273	1751.71	15.4353			8.58131	1.06189	5.43399	2.98238
	9.97978	0.972953	3.63167	3.30806	0.262975	3.16175	0.95577	1505.05	42.4396	1556.5	26.3433	1627.83	18.0894																		9.32389	0.890888	4.5733	2.74269	0.309396	2.59397	0.945775	1737.73	39.5123	1744.42	22.8559	1753.21	16.3023			8.56123	1.01733	5.42606	3.52892
	9.96754	1.08825	3.96709	3.59598	0.286911	3.42736	0.953108	1626.08	49.2589	1627.49	29.17	1630.11	20.2274																		9.2785	0.77862	4.62572	2.61254	0.311419	2.49382	0.954556	1747.69	38.1761	1753.92	21.8153	1762.14	14.2336			8.51307	1.19232	5.49251	3.83056
	9.9657	1.24747	4.01165	3.95939	0.290081	3.75773	0.94907	1641.93	54.4699	1636.56	32.1918	1630.45	23.1863																		9.27283	1.03573	4.73374	2.36304	0.318496	2.12396	0.898827	1782.38	33.0746	1773.23	19.8117	1763.26	18.9295			8.44917	1.35598	4.90999	3.46258
	9.89909	1.07897	3.94358	3.27702	0.283252	3.0943	0.944242	1607.72	44.03	1622.67	26.5496	1642.91	20.0218																		9.24101	0.887298	4.74315	2.52644	0.318034	2.3655	0.936298	1780.12	36.7954	1774.9	21.1894	1769.54	16.2037			8.15479	0.914823	5.77774	3.41054
	9.89454	1.18814	3.89695	3.17106	0.279774	2.94006	0.927153	1590.22	41.4338	1613.05	25.6286	1643.76	22.0456																		9.16313	0.734739	4.87158	2.29285	0.323893	2.17194	0.947266	1808.71	34.2546	1797.35	19.3185	1784.98	13.3917			8.12652	0.959604	5.86615	3.17639
	9.8711	1.09768	3.86482	3.13113	0.276811	2.93242	0.936537	1575.28	40.9832	1606.37	25.2629	1648.16	20.3554																		9.13657	0.802245	4.3427	2.37023	0.287893	2.23034	0.940978	1630.99	32.1399	1701.51	19.5647	1790.26	14.6128			8.09729	1.21895	6.07816	3.44716
	9.85884	1.11008	4.16238	3.37681	0.297753	3.18913	0.944422	1680.16	47.1696	1666.65	27.6526	1650.47	20.5793																		9.11502	0.784934	4.80796	2.78549	0.317985	2.67261	0.959475	1779.88	41.5677	1786.29	23.4178	1794.57	14.2917			8.01329	0.932191	6.21629	2.73172
	9.80326	1.05874	3.96428	3.37611	0.281983	3.20581	0.949556	1601.34	45.4573	1626.92	27.3817	1660.94	19.6011																		9.01834	0.92276	4.76716	2.56015	0.311942	2.38807	0.932785	1750.26	36.6041	1779.13	21.4911	1813.96	16.7595			7.9487	1.29122	5.93404	3.63007
	9.77454	1.1351	4.01247	3.14498	0.284574	2.933	0.932596	1614.36	41.8863	1636.72	25.5682	1666.37	21.0004																		8.81604	0.915545	5.12713	2.68914	0.327971	2.52849	0.940259	1828.54	40.2561	1840.61	22.8525	1855.06	16.5455			7.89416	1.07331	6.52161	3.43922
	9.71841	1.09016	4.24092	3.42467	0.299049	3.24653	0.947981	1686.59	48.1795	1681.98	28.1458	1677.02	20.1417																		8.62973	0.755232	5.4714	2.71226	0.342597	2.60499	0.96045	1899.15	42.8517	1896.12	23.2883	1893.57	13.5848			7.87251	0.986517	5.9652	3.83798
	9.70216	0.950276	4.22634	2.72522	0.297523	2.55417	0.937235	1679.02	37.7554	1679.15	22.3804	1680.11	17.5499																		8.42781	0.923528	5.42552	2.66603	0.331776	2.50096	0.938085	1846.98	40.1646	1888.9	22.8613	1936.05	16.5289			7.85334	1.26224	6.49409	3.94374
	9.64678	1.0959	4.32547	3.13344	0.302763	2.93554	0.936845	1705	43.9796	1698.23	25.8476	1690.67	20.2127																		8.38775	1.01755	5.86225	2.85329	0.356778	2.66568	0.934249	1966.88	45.1879	1955.66	24.7548	1944.57	18.1936			7.79526	0.80155	6.5019	3.03484
	9.63669	0.969007	4.18961	2.70285	0.292947	2.52317	0.933525	1656.24	36.8535	1671.99	22.1595	1692.6	17.8675																		8.36692	0.839442	5.86766	2.37217	0.35622	2.21868	0.935294	1964.23	37.567	1956.46	20.5822	1949.02	15.0007			7.71393	1.09546	6.91449	3.48341
	9.59226	1.10526	4.15281	3.13703	0.289035	2.93587	0.935877	1636.71	42.4373	1664.76	25.6767	1701.12	20.3584																		7.8782	0.772219	6.13564	3.00006	0.350731	2.89897	0.966305	1938.09	48.5262	1995.33	26.1989	2055.9	13.6315			7.68374	0.954114	6.62658	2.65531
	9.44073	1.13387	4.63394	3.03432	0.317427	2.81451	0.927557	1777.15	43.7164	1755.4	25.3466	1730.39	20.8087																		7.78073	0.932173	6.45199	2.9979	0.364252	2.84929	0.950429	2002.3	49.0423	2039.38	26.3612	2077.85	16.4121			7.58052	1.2008	6.84223	3.86313
	9.38152	1.18864	4.32586	2.67662	0.294465	2.39821	0.895986	1663.8	35.1685	1698.3	22.0784	1741.93	21.7824																		7.70187	0.973679	6.75663	3.05945	0.377584	2.90038	0.948006	2064.99	51.2481	2080.06	27.0666	2095.77	17.1082			7.52845	1.12966	6.88905	3.52098
	9.3518	0.986288	4.5228	2.72991	0.306896	2.54552	0.932454	1725.41	38.5345	1735.17	22.7039	1747.74	18.0606																		7.62912	0.857719	6.97155	2.36347	0.385915	2.20234	0.931825	2103.86	39.5333	2107.81	20.9908	2112.42	15.0422			7.45291	1.02902	6.80248	2.68784
	9.32926	1.09235	4.0889	3.17658	0.276784	2.98285	0.939015	1575.15	41.685	1652.09	25.9219	1752.16	19.9921																		7.57031	0.772865	6.95647	2.30719	0.382112	2.17389	0.942225	2086.14	38.7443	2105.89	20.4852	2125.98	13.5355			7.29768	1.21758	7.22569	2.90364
	9.29928	1.32097	4.54526	3.04386	0.306687	2.74228	0.900922	1724.38	41.4916	1739.29	25.3385	1758.05	24.1575																		7.54549	0.756088	7.08021	1.98388	0.387633	1.83415	0.924528	2111.84	33.0297	2121.56	17.6528	2131.74	13.2331			6.14548	1.22265	10.594	3.57265
	9.24391	1.124	4.5358	3.74428	0.304227	3.57159	0.953879	1712.23	53.7074	1737.56	31.1608	1768.96	20.5286																		5.96229	0.980208	10.9306	2.52241	0.472873	2.32416	0.921407	2496.15	48.103	2517.24	23.4695	2535.01	16.4452			6.04177	1.31719	11.0198	4.07551
	9.23593	0.874675	4.66921	2.37086	0.312905	2.20361	0.929458	1754.98	33.8561	1761.74	19.8295	1770.54	15.9712																		5.93535	0.736719	11.2529	2.52289	0.484615	2.41293	0.956414	2547.33	50.7755	2544.3	23.5305	2542.61	12.3477			6.01504	1.03472	10.347	3.5894
	9.11854	1.18676	4.576	3.30291	0.302761	3.08234	0.93322	1704.98	46.1786	1744.91	27.5294	1793.86	21.6083																		5.77288	0.800067	11.749	2.43563	0.492131	2.30048	0.944509	2579.89	48.9123	2584.61	22.795	2589.02	13.3491			6.01049	0.971923	10.6289	3.62082
	9.11635	1.12574	4.78693	3.06022	0.31664	2.84564	0.92988	1773.3	44.1167	1782.61	25.7089	1794.3	20.4961																		5.76556	0.97356	11.0581	2.70656	0.462603	2.5254	0.933067	2451.04	51.492	2528.03	25.208	2591.14	16.2414			5.88948	1.041	11.1639	2.85041
	9.08404	1.07969	4.7649	3.17602	0.314066	2.98686	0.940443	1760.68	46.0197	1778.74	26.6609	1800.76	19.6419																		5.49961	0.751934	13.1089	2.31208	0.523103	2.18639	0.945639	2712.33	48.4075	2687.52	21.8159	2669.63	12.4525			5.61849	0.894054	12.0426	3.44846
	9.05395	1.09437	4.85223	3.28062	0.318763	3.09271	0.94272	1783.68	48.191	1794	27.6257	1806.8	19.8942																		5.36122	0.847138	13.2562	2.16492	0.515668	1.99229	0.920262	2680.78	43.6962	2698.07	20.443	2711.75	13.974			5.59038	1.22447	12.1414	3.33195
	9.04567	1.03478	4.89487	3.36308	0.321269	3.19993	0.951488	1795.93	50.1587	1801.37	28.3627	1808.46	18.8069																		5.35641	1.02363	12.8894	2.40038	0.50095	2.17118	0.904513	2617.88	46.7142	2671.6	22.622	2713.23	16.8831			5.53955	1.1887	11.8033	3.39446
	8.91896	0.866191	4.6928	2.72665	0.303692	2.5854	0.948199	1709.59	38.8249	1765.96	22.8264	1834.06	15.6952																		5.3303	0.737773	10.632	2.54476	0.411202	2.43547	0.957051	2220.41	45.7481	2491.51	23.6219	2721.28	12.1589			5.43849	1.00194	13.2687	3.50149
	8.89182	1.20162	5.1126	3.14434	0.329853	2.90568	0.924099	1837.67	46.4612	1838.2	26.7101	1839.58	21.757																		5.28106	0.862533	13.7439	2.42013	0.526646	2.26121	0.934334	2727.31	50.2862	2732.22	22.9108	2736.56	14.1918			5.40857	1.07906	12.8194	3.23304
	8.75636	1.45686	5.06892	3.82382	0.322053	3.53542	0.924577	1799.75	55.5198	1830.92	32.4399	1867.32	26.2889																		5.12592	0.888064	14.3545	2.82727	0.533886	2.68418	0.949388	2757.8	60.2278	2773.43	26.8442	2785.51	14.5464			5.39091	1.3054	12.8427	3.08157
	8.73706	1.16139	5.19078	3.00159	0.329068	2.76781	0.922112	1833.86	44.1772	1851.1	25.56	1871.31	20.946																		4.59078	0.922623	16.6809	2.71386	0.555639	2.55221	0.940437	2848.58	58.7666	2916.67	26.0032	2964.69	14.8784			5.24409	0.862454	13.3973	2.75048
	8.71426	1.03467	5.23453	2.99748	0.330975	2.81325	0.938537	1843.11	45.0982	1858.26	25.5595	1876.02	18.6513																		4.23439	0.994042	19.791	2.5065	0.608061	2.30096	0.917997	3062.23	56.0896	3081.2	24.231	3094.28	15.8519			4.85124	1.35664	15.7856	4.11906
	8.71326	1.04404	5.20909	3.50066	0.329329	3.34135	0.954491	1835.13	53.364	1854.1	29.829	1876.22	18.8198
	8.70474	0.885784	5.30271	2.62651	0.33492	2.47264	0.941416	1862.19	39.9917	1869.3	22.4414	1877.99	15.9633
	8.69002	1.01227	5.45393	2.89425	0.343889	2.71146	0.936843	1905.35	44.7283	1893.37	24.8392	1881.04	18.2365
	8.68358	1.15606	5.24827	2.85579	0.330676	2.61133	0.914399	1841.66	41.8327	1860.49	24.361	1882.37	20.8242
	8.67459	1.09287	5.26564	2.9566	0.331427	2.7472	0.929176	1845.29	44.0845	1863.31	25.2347	1884.24	19.6812
	8.48635	0.947744	5.61916	2.99975	0.346003	2.8461	0.948779	1915.48	47.1639	1919.04	25.8629	1923.65	16.9873
	7.86281	1.21572	6.44498	3.75907	0.367694	3.55706	0.946259	2018.54	61.6482	2038.42	33.0539	2059.35	21.4502
	7.76658	1.00502	6.64213	3.51082	0.374305	3.36389	0.958151	2049.62	59.0629	2064.96	30.9932	2081.05	17.6884
	7.76534	1.29684	6.54527	3.82974	0.368788	3.60349	0.940922	2023.69	62.5885	2052.01	33.7452	2081.33	22.8248
	7.67735	0.951792	7.10701	3.02297	0.395901	2.86922	0.94914	2150.14	52.4595	2124.92	26.9148	2101.37	16.713
	7.28021	0.936958	7.36402	2.95941	0.388997	2.80717	0.948558	2118.18	50.6806	2156.61	26.4627	2194.15	16.284
	7.26346	1.33587	7.6283	4.17088	0.402031	3.95116	0.947321	2178.38	73.0404	2188.2	37.4591	2198.15	23.2083
	7.09862	1.11062	7.59215	3.12468	0.391045	2.92064	0.934701	2127.67	52.9288	2183.94	28.042	2237.94	19.211
	6.91431	1.08788	7.72931	3.5706	0.387773	3.40084	0.952455	2112.49	61.2599	2200.02	32.1127	2283.34	18.7287
	6.19034	1.17624	10.1947	3.21033	0.457905	2.98709	0.93046	2430.3	60.4818	2452.59	29.6938	2471.85	19.8561
	6.11071	1.21927	10.3588	3.38769	0.45929	3.16067	0.932986	2436.42	64.1294	2467.37	31.3797	2493.68	20.5376
	6.09069	1.14295	10.5929	2.62884	0.468132	2.36738	0.900539	2475.36	48.6628	2488.09	24.395	2499.21	19.2412
	6.06633	1.54906	9.50047	3.3507	0.418175	2.97113	0.886719	2252.19	56.4781	2387.59	30.7918	2505.96	26.0621
	5.68174	1.091	10.4325	3.31059	0.430088	3.12565	0.944138	2306.11	60.599	2473.94	30.6841	2615.54	18.1615
	5.61501	1.128	12.2101	3.60863	0.497458	3.4278	0.94989	2602.86	73.4098	2620.68	33.8802	2635.19	18.739
	5.55585	1.11722	12.1872	3.54591	0.491296	3.36531	0.949068	2576.28	71.4727	2618.93	33.2862	2652.77	18.5287
	5.5506	1.06783	12.564	2.52289	0.506006	2.28577	0.906011	2639.56	49.5094	2647.53	23.7327	2654.34	17.7068
	5.48457	0.859634	12.0071	3.27987	0.477825	3.16522	0.965042	2517.79	65.9755	2604.96	30.7523	2674.16	14.2267
	5.34303	1.36776	13.7101	3.44902	0.531517	3.16623	0.918006	2747.84	70.8391	2729.89	32.6513	2717.35	22.5475
	5.29582	1.1509	13.4833	2.99949	0.518103	2.7699	0.923458	2691.13	60.9412	2714.11	28.3608	2731.97	18.946
	5.26957	0.993457	13.9581	2.23049	0.533689	1.99703	0.895333	2756.97	44.7983	2746.86	21.137	2740.14	16.3413
	5.25766	1.07783	13.9247	2.39011	0.531209	2.13329	0.892547	2746.54	47.7097	2744.6	22.6465	2743.87	17.7234
	5.1399	1.40981	14.0657	3.86671	0.524569	3.60054	0.931163	2718.53	79.8663	2754.14	36.6718	2781.06	23.1048
	5.02343	1.02503	13.4912	2.7922	0.491744	2.59724	0.93018	2578.22	55.1933	2714.67	26.401	2818.55	16.7401
	5.00726	1.31448	14.4231	3.29417	0.524016	3.02055	0.916937	2716.19	66.9538	2777.95	31.2896	2823.82	21.4587
[truncated: 35 more columns]

## Sheet: E. Duncan Trail, CO
	E. Duncan Trail, CO
						CO15-DT-1Jes															CO15-DT-1Jw															CO15-DT-2Jw
				Isotope ratios						Apparent ages (Ma)									Isotope ratios						Apparent ages (Ma)									Isotope ratios						Apparent ages (Ma)									Isotope ratios
	206Pb*	±	207Pb*	±	206Pb*	±	error	206Pb*	±	207Pb*	±	206Pb*	±			206Pb*	±	207Pb*	±	206Pb*	±	error	206Pb*	±	207Pb*	±	206Pb*	±			206Pb*	±	207Pb*	±	206Pb*	±	error	206Pb*	±	207Pb*	±	206Pb*	±			206Pb*	±	207Pb*	±
	207Pb*	(%)	235U*	(%)	238U	(%)	corr.	238U*	(Ma)	235U	(Ma)	207Pb*	(Ma)			207Pb*	(%)	235U*	(%)	238U	(%)	corr.	238U*	(Ma)	235U	(Ma)	207Pb*	(Ma)			207Pb*	(%)	235U*	(%)	238U	(%)	corr.	238U*	(Ma)	235U	(Ma)	207Pb*	(Ma)			207Pb*	(%)	235U*	(%)
	18.4093	0.937934	0.422254	1.34648	0.0563779	0.966064	0.717475	353.56	3.32364	357.661	4.05908	384.335	21.0743			20.074	1.51297	0.180555	1.98427	0.026287	1.28383	0.647005	167.268	2.11982	168.538	3.08144	186.382	35.2454			14.5967	3.07264	0.217855	3.40212	0.0230632	1.46058	0.429314	146.987	2.12256	200.123	6.17954	884.002	63.543			19.4908	1.36385	0.170042	2.05883
	18.4322	1.34727	0.424133	1.78064	0.0566992	1.16427	0.653852	355.52	4.02716	359.002	5.38468	381.544	30.2825			19.5098	2.42036	0.187701	2.95621	0.0265595	1.69737	0.57417	168.979	2.83093	174.666	4.74383	252.393	55.6907			20.5559	1.62342	0.174599	2.31551	0.0260301	1.65109	0.713057	165.654	2.70026	163.402	3.49486	130.873	38.184			20.0107	1.63284	0.165647	2.28405
	18.06	1.67037	0.447776	2.31227	0.0586512	1.59889	0.691482	367.417	5.71033	375.721	7.26165	427.217	37.2633			19.7148	1.99042	0.191289	2.48159	0.0273515	1.48205	0.59722	173.951	2.54357	177.729	4.04608	228.253	45.989			20.2956	2.61378	0.186366	2.88918	0.0274327	1.23105	0.426091	174.46	2.1189	173.524	4.60846	160.759	61.165			19.5721	1.65303	0.171916	2.23843
	18.4539	1.65672	0.474256	1.86144	0.0634746	0.84867	0.455921	396.722	3.26535	394.124	6.08029	378.892	37.2609			19.4407	1.6087	0.237599	1.94019	0.0335008	1.08463	0.559032	212.422	2.26644	216.453	3.78217	260.551	36.9686			20.1205	2.49178	0.234679	3.05194	0.0342462	1.76219	0.577401	217.069	3.76149	214.054	5.8902	180.985	58.0809			19.5769	1.32737	0.172478	2.27942
	17.8364	1.10143	0.494808	1.63158	0.0640093	1.20371	0.737757	399.962	4.66809	408.182	5.48396	454.938	24.4447			19.1205	2.61665	0.247139	2.84482	0.0342721	1.11632	0.392405	217.231	2.38459	224.25	5.72423	298.517	59.6786			19.679	2.62482	0.242887	3.08008	0.0346662	1.61158	0.523227	219.687	3.48079	220.782	6.11182	232.452	60.6047			20.0088	1.58107	0.169103	2.02385
	17.8947	1.85119	0.505127	2.14151	0.0655577	1.07665	0.502753	409.337	4.27012	415.167	7.29768	447.679	41.1481			18.8237	2.39694	0.285454	2.70494	0.0389709	1.25354	0.463426	246.451	3.03104	254.975	6.09919	334.096	54.3195			19.5555	1.70344	0.270233	2.14497	0.038327	1.30353	0.607714	242.455	3.10177	242.88	4.63349	247.011	39.2385			19.5722	1.94824	0.173333	2.33678
	17.9924	1.5059	0.515391	1.9169	0.0672549	1.18608	0.618747	419.596	4.81822	422.068	6.61984	435.573	33.5453			18.8324	1.76689	0.290136	2.19913	0.0396283	1.30929	0.595371	250.528	3.21724	258.666	5.02168	333.063	40.06			19.393	1.38427	0.27442	1.83434	0.0385975	1.20358	0.656137	244.134	2.88341	246.221	4.01066	266.145	31.751			20.2848	1.30971	0.167764	2.14658
	17.3614	0.892163	0.541911	1.42138	0.0682355	1.10651	0.778475	425.516	4.55634	439.683	5.07238	514.525	19.6055			18.7014	2.67318	0.298617	3.09837	0.0405031	1.56652	0.505595	255.95	3.93096	265.319	7.23442	348.894	60.4468			12.7223	3.49259	0.420037	4.00465	0.038757	1.95935	0.489268	245.124	4.71266	356.078	12.0283	1162.12	69.2512			20.0911	1.79717	0.170908	2.12163
	17.9695	1.42667	0.529616	2.65925	0.0690232	2.24415	0.843905	430.268	9.34069	431.555	9.34931	438.406	31.7543			19.306	1.21688	0.293334	1.63205	0.0410729	1.08756	0.666375	259.48	2.76595	261.181	3.75852	276.492	27.8588			19.3679	1.68008	0.287862	2.18615	0.0404358	1.39877	0.639833	255.534	3.50441	256.875	4.96167	269.114	38.532			19.3468	2.00136	0.178939	2.36102
	17.399	2.24426	0.551148	2.91758	0.0695491	1.86429	0.638986	433.439	7.8149	445.749	10.5265	509.809	49.3533			19.1984	1.70057	0.296273	2.12376	0.0412531	1.27217	0.599019	260.596	3.2491	263.485	4.92872	289.264	38.8825			19.4966	1.65836	0.308617	2.18976	0.0436393	1.43	0.653037	275.351	3.8546	273.108	5.2437	253.927	38.1281			18.2357	2.78061	0.191634	3.05135
	17.9168	1.06617	0.54137	1.70702	0.0703481	1.33312	0.780961	438.253	5.64825	439.328	6.08781	444.944	23.7176			17.9225	1.22261	0.318087	1.60175	0.0413468	1.0348	0.646044	261.176	2.64863	280.43	3.92489	444.236	27.1885			9.43413	1.09737	0.639894	2.49304	0.0437833	2.23854	0.897913	276.241	6.05313	502.24	9.87792	1731.68	20.1354			20.0039	2.07635	0.178796	2.65745
	17.3351	1.44985	0.561673	1.88092	0.070617	1.19825	0.637055	439.872	5.09497	452.615	6.86912	517.849	31.8424			18.6422	2.50797	0.307479	2.84654	0.041573	1.34642	0.473003	262.576	3.46435	272.225	6.79725	356.021	56.638			15.3872	1.38975	0.392572	1.95412	0.0438103	1.37375	0.703003	276.408	3.71691	336.246	5.59355	773.968	29.2426			16.6765	4.73121	0.217073	5.1194
	17.7021	1.58528	0.557194	1.94981	0.0715368	1.13518	0.582201	445.408	4.88547	449.699	7.08425	471.709	35.086			19.067	1.16514	0.325855	1.56982	0.0450614	1.05204	0.670163	284.13	2.92423	286.396	3.91751	304.941	26.5365			19.2539	1.9859	0.338612	2.42347	0.0472847	1.38902	0.573156	297.829	4.04281	296.12	6.22473	282.681	45.4357			18.7284	2.00694	0.198499	2.62398
	17.5986	1.31177	0.564701	1.73987	0.0720769	1.14298	0.656935	448.656	4.95367	454.582	6.37587	484.679	28.9612			18.7775	1.46346	0.340622	1.97508	0.0463883	1.32636	0.671546	292.309	3.79048	297.643	5.09548	339.715	33.1321			19.7967	2.86231	0.338809	3.21536	0.048646	1.46483	0.455572	306.203	4.3805	296.269	8.26239	218.678	66.2779			12.4487	1.29199	0.311216	3.54165
	17.3692	2.50147	0.574384	2.95068	0.0723571	1.56497	0.530376	450.341	6.80716	460.846	10.931	513.55	54.964			18.509	1.24221	0.360097	1.91346	0.0483394	1.45542	0.760622	304.319	4.32619	312.288	5.14401	372.186	27.9708			16.5468	2.5632	0.409119	2.9098	0.0490979	1.37731	0.473333	308.981	4.15523	348.24	8.57839	619.149	55.3261			19.5625	1.55591	0.232251	2.07983
	17.6649	1.36126	0.565096	1.71062	0.0723989	1.03596	0.605603	450.592	4.50855	454.838	6.2715	476.35	30.1209			18.8557	1.25181	0.385422	1.62023	0.0527082	1.02865	0.634877	331.127	3.32013	331.02	4.57683	330.245	28.3867			19.0588	1.8857	0.356113	2.14905	0.0492247	1.03081	0.479656	309.76	3.11752	309.308	5.73024	305.91	42.9715			19.0791	1.41856	0.239839	2.25186
	17.9021	0.846298	0.558386	1.55962	0.0724997	1.31003	0.839971	451.198	5.70873	450.475	5.67429	446.767	18.8226			17.9975	2.35311	0.406002	2.61146	0.0529956	1.1325	0.433667	332.887	3.67426	345.992	7.65707	434.933	52.4101			19.2127	1.37387	0.354433	1.90767	0.0493881	1.32351	0.693784	310.764	4.01542	308.05	5.06889	287.576	31.3822			17.8153	2.0011	0.265084	2.42466
	17.5512	1.99973	0.571445	2.26826	0.0727411	1.07056	0.471974	452.649	4.67966	458.948	8.37544	490.597	44.1318			18.6162	1.53502	0.392757	1.95028	0.0530291	1.20304	0.616854	333.092	3.90546	336.382	5.58446	359.168	34.6433			18.7017	1.12246	0.381204	1.97041	0.0517057	1.61945	0.821884	324.985	5.13252	327.924	5.52194	348.856	25.3662			14.2	5.78695	0.336371	5.95016
	17.8969	1.0791	0.563091	1.6987	0.0730893	1.31192	0.772306	454.741	5.76028	453.536	6.21366	447.413	23.9924			18.523	2.49385	0.404898	2.84373	0.0543944	1.36657	0.480556	341.445	4.54466	345.194	8.32201	370.489	56.1602			19.0087	2.1273	0.376933	2.3739	0.0519655	1.05357	0.443813	326.577	3.35501	324.779	6.59857	311.929	48.4178			18.8648	2.26934	0.258707	2.85969
	17.5805	1.0599	0.573751	1.36287	0.0731564	0.856764	0.628646	455.144	3.76503	460.438	5.04518	486.937	23.3756			18.3413	1.40874	0.436597	1.99201	0.0580776	1.40839	0.707019	363.924	4.98348	367.85	6.14714	392.644	31.6067			18.5749	1.33414	0.391645	1.84079	0.0527616	1.26831	0.689	331.454	4.0976	335.571	5.26021	364.18	30.0829			18.9969	1.34709	0.257799	1.87249
	17.5954	0.96743	0.574705	1.51371	0.0733405	1.16422	0.769115	456.25	5.12814	461.053	5.6095	485.079	21.3413			17.8398	1.29233	0.458972	1.67892	0.0593848	1.07175	0.638357	371.883	3.87288	383.543	5.36295	454.517	28.705			18.8661	1.54331	0.392129	2.1108	0.053655	1.44003	0.68222	336.923	4.72719	335.924	6.03716	329.001	35.0091			17.2054	1.36056	0.28469	2.24259
	17.3416	1.83212	0.588101	2.10813	0.0739673	1.04285	0.494682	460.013	4.63011	469.654	7.92702	517.03	40.2269			18.1604	1.32447	0.454726	1.90988	0.0598929	1.37601	0.720471	374.974	5.0125	380.584	6.06192	414.83	29.6011			18.8905	1.59726	0.408112	1.83532	0.0559142	0.903968	0.49254	350.729	3.08578	347.515	5.40116	326.078	36.2494			19.2547	1.36515	0.270918	2.01369
	17.4259	1.04866	0.591897	1.58412	0.0748066	1.18733	0.749519	465.049	5.32721	472.078	5.98075	506.409	23.0676			18.3568	1.0369	0.450657	1.51297	0.0599985	1.10178	0.728224	375.616	4.02021	377.739	4.77249	390.751	23.2711			18.6304	1.2214	0.419288	1.75654	0.0566545	1.26238	0.718678	355.248	4.36326	355.542	5.26906	357.443	27.5734			17.7412	1.24243	0.299731	2.14271
	17.4833	1.55798	0.612265	2.10113	0.0776356	1.40976	0.670955	481.994	6.54716	484.988	8.10204	499.137	34.3169			18.2499	1.2905	0.457682	1.67529	0.060579	1.06828	0.637666	379.146	3.93352	382.645	5.34104	403.843	28.8973			18.3862	1.72805	0.429995	2.19871	0.0573395	1.35947	0.618306	359.425	4.75256	363.173	6.71324	387.154	38.7868			19.416	1.19382	0.284507	1.94236
	17.0643	1.13511	0.639625	1.52972	0.0791614	1.02546	0.670359	491.115	4.84915	502.074	6.05938	552.353	24.7751			18.2265	0.992436	0.471352	1.37395	0.0623084	0.950166	0.691557	389.649	3.59264	392.122	4.46923	406.717	22.2108			17.1643	1.37618	0.464555	2.18102	0.0578311	1.69203	0.775798	362.422	5.96309	387.421	7.02469	539.554	30.1136			19.3473	1.21719	0.287598	1.96175
	16.577	2.4518	0.689681	2.73676	0.0829188	1.21596	0.444307	513.521	6.00199	532.609	11.343	615.217	52.9592			18.112	0.984007	0.484825	1.3878	0.063687	0.978637	0.70517	398.009	3.77726	401.378	4.6012	420.794	21.9681			17.6707	1.67805	0.451436	2.22326	0.0578562	1.45843	0.655987	362.575	5.14194	378.285	7.02143	475.6	37.1105			19.4909	1.66879	0.30065	2.13744
	16.6766	3.86756	0.815913	4.05069	0.0986847	1.20417	0.297276	606.696	6.97243	605.766	18.4823	602.265	83.7534			17.9931	1.27215	0.490788	1.65085	0.0640471	1.05212	0.63732	400.191	4.08247	405.447	5.51849	435.478	28.3362			18.7556	1.34594	0.437912	1.85129	0.0595684	1.27112	0.686611	373	4.60672	368.779	5.72485	342.341	30.464			17.4009	1.61973	0.337901	3.96889
	16.0867	1.38299	0.918526	1.94154	0.107166	1.36269	0.701861	656.268	8.50278	661.58	9.43872	679.706	29.537			17.9829	1.32622	0.491314	1.86595	0.0640794	1.31259	0.703444	400.387	5.09556	405.806	6.24202	436.743	29.5355			18.4736	1.28659	0.444624	1.88827	0.0595721	1.38212	0.73195	373.023	5.00928	373.508	5.90114	376.495	28.926			18.9994	1.60865	0.310226	2.41843
	15.4737	1.73378	1.03526	2.13759	0.116183	1.25033	0.584924	708.558	8.38979	721.555	11.0408	762.153	36.5521			17.9947	0.882217	0.496365	1.23011	0.0647804	0.857246	0.696884	404.632	3.36207	409.239	4.14325	435.288	19.6663			18.6946	1.45343	0.442833	1.92977	0.0600419	1.26948	0.657838	375.881	4.63527	372.248	6.01402	349.703	32.8569			18.9462	0.99572	0.317286	1.55972
	15.7035	1.04548	1.02644	1.7475	0.116904	1.40027	0.801296	712.719	9.44807	717.146	8.98793	731.042	22.1512			18.0539	1.18095	0.504317	1.70407	0.0660348	1.22849	0.720919	412.222	4.9056	414.621	5.80076	427.968	26.3383			18.65	1.54308	0.444295	2.12961	0.0600964	1.4677	0.689187	376.212	5.36364	373.276	6.652	355.11	34.8293			18.4516	1.44196	0.345552	2.04484
	15.2351	2.04295	1.13844	2.53582	0.125793	1.50224	0.592407	763.818	10.8206	771.771	13.7084	794.835	42.8513			17.466	1.98805	0.521677	2.43691	0.0660836	1.40932	0.578321	412.517	5.63157	426.271	8.48318	501.352	43.7689			18.6821	1.99806	0.448034	2.21467	0.0607065	0.955254	0.431331	379.921	3.52433	375.902	6.95789	351.202	45.1373			17.9906	2.52307	0.356817	3.10315
	15.085	1.67982	1.20465	2.18429	0.131797	1.39619	0.639197	798.106	10.4809	802.73	12.1194	815.6	35.124			17.6476	1.79524	0.516797	2.28153	0.0661462	1.40801	0.617135	412.896	5.63135	423.009	7.89327	478.491	39.682			18.8878	1.35055	0.443538	2.00734	0.0607591	1.48507	0.739819	380.24	5.48351	372.744	6.26265	326.384	30.6379			16.8731	0.954849	0.388744	2.13573
	14.2638	0.976846	1.28851	1.51866	0.133298	1.1628	0.765675	806.651	8.81665	840.637	8.68234	931.479	20.068			17.9235	1.77941	0.512328	2.25685	0.0665992	1.38819	0.615101	415.634	5.58773	420.014	7.76324	444.111	39.5873			18.1884	1.50803	0.480304	2.00558	0.0633593	1.32219	0.659257	396.023	5.0786	398.281	6.60756	411.387	33.7237			18.2535	1.07778	0.362242	1.74425
	14.424	2.63713	1.43835	3.05781	0.150469	1.54782	0.506188	903.591	13.0501	905.031	18.317	908.527	54.3449			17.9539	1.89266	0.516185	2.19873	0.0672143	1.11904	0.508949	419.351	4.54334	422.599	7.60088	440.34	42.1343			17.9967	1.40637	0.48596	1.85821	0.0634297	1.21453	0.653602	396.45	4.66994	402.154	6.17056	435.037	31.3283			18.977	1.61584	0.357195	2.11366
	14.2505	0.864673	1.42791	1.60647	0.147581	1.35392	0.84279	887.387	11.2242	900.675	9.59365	933.397	17.7307			18.1691	0.924472	0.51133	1.54993	0.0673802	1.24404	0.802643	420.353	5.06252	419.343	5.32462	413.77	20.6645			18.2738	2.58849	0.485593	3.14013	0.0643576	1.77767	0.566116	402.072	6.9292	401.903	10.4223	400.907	57.995			18.7136	1.74744	0.365121	2.2992
	14.0103	1.04007	1.57769	1.45337	0.160313	1.01516	0.698485	958.515	9.04161	961.459	9.03253	968.193	21.2194			17.6286	1.53526	0.535419	1.81596	0.0684559	0.969888	0.534091	426.846	4.00585	435.4	6.42997	480.871	33.9206			18.377	1.67164	0.489578	2.15629	0.0652524	1.36206	0.631669	407.489	5.37848	404.623	7.19621	388.272	37.5131			17.9659	1.10121	0.389147	2.02094
	13.9804	0.983644	1.52682	1.37288	0.154813	0.957724	0.697604	927.885	8.27663	941.22	8.42335	972.536	20.0499			17.6483	1.28534	0.53873	1.75695	0.068956	1.19782	0.681761	429.863	4.98107	437.587	6.24603	478.409	28.4148			17.3886	2.02245	0.527112	2.29257	0.0664762	1.07961	0.470917	414.891	4.33811	429.891	8.03515	511.087	44.4558			18.6427	2.21592	0.376685	2.91503
	13.9795	1.03077	1.5719	1.38312	0.159373	0.922241	0.666785	953.292	8.1725	959.177	8.5836	972.714	21.0024			18.3222	2.69707	0.518993	3.04602	0.0689664	1.41565	0.464754	429.925	5.88772	424.479	10.5678	394.983	60.5			18.2785	1.72835	0.503753	2.07578	0.0667817	1.14963	0.553833	416.737	4.63937	414.24	7.06087	400.327	38.7261			17.6822	1.35689	0.400707	2.12298
	13.9325	1.17017	1.65849	1.5923	0.167587	1.07986	0.678179	998.803	9.99167	992.799	10.0866	979.538	23.8392			17.668	1.26597	0.541994	2.0595	0.0694513	1.62446	0.788763	432.849	6.80057	439.739	7.35039	475.967	27.9938			17.9711	1.63101	0.512517	1.96767	0.0668007	1.10069	0.55939	416.852	4.44306	420.14	6.77011	438.209	36.311			18.6401	1.43155	0.391016	1.84012
	13.9201	1.59184	1.54491	1.95208	0.155971	1.1299	0.57882	934.35	9.82784	948.466	12.0332	981.391	32.4051			17.2394	2.76157	0.557663	2.97909	0.0697255	1.11746	0.375102	434.502	4.69539	450.004	10.83	530.04	60.5324			18.1903	1.51167	0.518701	2.09408	0.0684315	1.44915	0.692021	426.699	5.98328	424.283	7.26231	411.158	33.8063			11.9825	2.64806	0.629128	3.30611
	13.9067	1.17889	1.60445	1.74248	0.161825	1.28315	0.736392	966.912	11.5213	971.945	10.9	983.358	24.0031			17.7294	2.00627	0.552716	2.51386	0.0710715	1.51472	0.602547	442.608	6.47929	446.775	9.08642	468.276	44.4468			17.8588	1.54094	0.534003	2.01235	0.0691662	1.29423	0.643145	431.13	5.39733	434.463	7.11307	452.145	34.2325			18.2037	3.17311	0.41848	3.74093
	13.8997	0.735738	1.59509	1.21223	0.1608	0.963422	0.794754	961.222	8.60328	968.289	7.56578	984.361	14.9702			17.868	1.00067	0.5534	1.77453	0.0717156	1.46548	0.82584	446.484	6.32168	447.222	6.41913	450.999	22.2225			18.0904	1.42684	0.532991	1.74731	0.0699306	1.00858	0.577219	435.737	4.24953	433.793	6.1686	423.46	31.8518			17.907	1.02263	0.428682	2.08616
	13.8834	1.18303	1.61709	2.05192	0.162828	1.67654	0.817063	972.471	15.1338	976.862	12.8744	986.767	24.0559			17.5736	1.27738	0.563228	1.75325	0.0717865	1.20092	0.684966	446.91	5.18522	453.625	6.4142	487.779	28.1685			17.9709	1.39703	0.536851	2.04436	0.0699717	1.49256	0.730086	435.985	6.29216	436.346	7.25132	438.233	31.0987			18.2932	1.0295	0.450309	1.72708
	13.8766	0.932769	1.40147	1.42314	0.141047	1.07483	0.755255	850.58	8.56483	889.557	8.43321	987.746	18.9784			18.1605	2.578	0.551777	2.86814	0.0726759	1.25703	0.438274	452.257	5.49017	446.16	10.3557	414.821	57.6292			17.0855	1.2882	0.575503	1.74997	0.071314	1.18445	0.676843	444.067	5.0827	461.567	6.49074	549.628	28.1422			16.0628	0.947597	0.515147	1.39789
	13.8457	1.13663	1.67426	1.85402	0.168126	1.46474	0.790034	1001.78	13.5901	998.803	11.7864	992.262	23.092			17.4235	1.47291	0.581154	2.22925	0.0734385	1.67335	0.750633	456.839	7.37993	465.203	8.31985	506.703	32.3975			17.1794	2.03466	0.576592	2.44693	0.0718416	1.35929	0.555507	447.241	5.87321	462.269	9.08684	537.663	44.5145			18.1091	1.40177	0.458405	1.90243
	13.8233	0.984675	1.61326	1.66851	0.16174	1.34698	0.807292	966.438	12.0889	975.377	10.4592	995.544	20.0062			17.2569	1.67908	0.587599	2.00072	0.0735431	1.08792	0.543762	457.467	4.80437	469.333	7.51908	527.815	36.8027			17.7843	1.29446	0.572973	1.77764	0.0739042	1.21835	0.685375	459.634	5.40498	459.936	6.57495	461.419	28.7163			17.569	1.54296	0.482601	2.87379
	13.822	0.698117	1.58267	1.34587	0.158657	1.15065	0.85495	949.309	10.157	963.418	8.3746	995.777	14.1669			17.1033	2.12494	0.593039	2.68639	0.0735635	1.64358	0.611815	457.589	7.26011	472.806	10.1548	547.327	46.4099			17.4667	1.1226	0.583958	1.56294	0.0739758	1.08745	0.695772	460.064	4.82862	467.002	5.8508	501.273	24.7268			18.1291	1.46364	0.468108	1.83738
	13.8202	0.830362	1.70929	1.53052	0.171329	1.28569	0.840033	1019.43	12.1229	1012.02	9.80491	995.999	16.8735			17.2081	1.59658	0.590872	1.87334	0.0737438	0.979964	0.523111	458.672	4.33864	471.424	7.06499	533.991	34.9782			17.7497	1.76033	0.577653	2.18133	0.0743631	1.2882	0.590556	462.389	5.74789	462.952	8.10993	465.727	39.0093			17.7426	2.55763	0.484295	2.97191
	13.8076	1.26509	1.64128	1.78097	0.164361	1.25356	0.70386	980.967	11.4071	986.204	11.2376	997.86	25.7019			17.6043	1.21879	0.588628	1.62385	0.075155	1.07305	0.660806	467.138	4.83531	469.991	6.1094	483.967	26.9295			17.8556	2.12537	0.577971	2.60958	0.0748479	1.51418	0.580238	465.297	6.79717	463.157	9.70558	452.537	47.2124			18.2268	1.66602	0.476718	1.95401
	13.8047	0.952788	1.64271	1.55439	0.164471	1.22814	0.79011	981.573	11.1822	986.755	9.81105	998.28	19.3548			17.484	0.839193	0.592899	1.30632	0.0751832	1.00111	0.76636	467.307	4.51272	472.717	4.93713	499.041	18.4838			17.7128	0.977727	0.589989	1.66023	0.075793	1.3418	0.8082	470.963	6.09406	470.861	6.25539	470.341	21.6625			18.1315	1.10146	0.480521	2.13747
	13.804	1.32643	1.63285	1.88884	0.163475	1.34473	0.711933	976.058	12.18	982.959	11.895	998.382	26.9448			17.5616	1.51913	0.607908	1.88471	0.0774284	1.11552	0.591879	480.755	5.16782	482.24	7.23532	489.304	33.5167			17.2636	1.06835	0.619276	1.72444	0.077538	1.35364	0.784971	481.41	6.27917	489.393	6.6965	526.96	23.4239			17.7359	1.21394	0.496007	1.86737
	13.7737	0.704314	1.70435	1.45885	0.170258	1.27757	0.875738	1013.53	11.982	1010.17	9.33577	1002.86	14.2865			17.6789	2.0348	0.60563	2.42734	0.0776535	1.32348	0.545237	482.101	6.14775	480.8	9.29684	474.613	45.0092			17.5147	1.82986	0.645882	2.97619	0.0820453	2.3472	0.788657	508.32	11.473	505.942	11.8595	495.226	40.328			17.7734	0.984828	0.496437	1.73869
	13.7714	1.14892	1.70362	1.79122	0.170156	1.37421	0.767192	1012.97	12.8818	1009.89	11.461	1003.19	23.3219			17.6296	1.69975	0.608999	2.01963	0.0778678	1.09077	0.540083	483.383	5.07975	482.928	7.76195	480.75	37.5565			17.2065	1.56878	0.658092	1.95819	0.0821253	1.17194	0.598479	508.796	5.73354	513.446	7.89174	534.224	34.3472			18.0246	1.66537	0.489636	2.17155
	13.7591	1.38661	1.6553	1.84538	0.165183	1.21768	0.659852	985.513	11.1281	991.58	11.6815	1005.01	28.1394			17.0622	1.28777	0.650031	1.97097	0.0804392	1.49211	0.757041	498.744	7.1612	508.498	7.88427	552.621	28.1265			17.0898	1.8811	0.662835	2.2019	0.0821562	1.14449	0.519772	508.98	5.60117	516.346	8.91241	549.102	41.0744			18.1027	1.4453	0.489967	2.33268
	13.7502	0.999609	1.6483	1.44494	0.164378	1.04337	0.722088	981.061	9.49526	988.899	9.13186	1006.31	20.2804			17.2326	1.21882	0.651015	1.8538	0.0813657	1.3968	0.753479	504.269	6.7752	509.103	7.42235	530.895	26.6844			17.2674	1.02658	0.656252	1.51822	0.0821855	1.11854	0.736744	509.155	5.47601	512.319	6.10823	526.484	22.5262			17.595	1.13852	0.504175	1.79913
	13.7413	1.13822	1.65342	1.98236	0.164782	1.62303	0.818735	983.296	14.8016	990.861	12.5433	1007.63	23.0702			16.8361	1.56927	0.673539	2.11769	0.0822438	1.42198	0.671474	509.502	6.96608	522.862	8.65426	581.667	34.0825			17.1374	1.70154	0.66211	2.16931	0.0822952	1.34561	0.620295	509.808	6.59578	515.904	8.77469	542.975	37.2002			18.2249	1.04782	0.486938	1.72383
	13.7139	1.11596	1.68438	1.6008	0.167533	1.14769	0.71695	998.502	10.6163	1002.64	10.1995	1011.67	22.6237			17.225	1.59913	0.672443	1.85775	0.0840065	0.945528	0.508965	519.993	4.72361	522.197	7.58454	531.869	35.0368			17.3771	1.2792	0.653451	1.90506	0.0823551	1.4117	0.741027	510.165	6.92439	510.6	7.64485	512.546	28.0986			18.1904	1.10827	0.4906	1.74539
	13.7031	1.64954	1.62035	2.06571	0.161037	1.24346	0.601953	962.535	11.1181	978.126	12.971	1013.28	33.4527			17.1099	1.26437	0.67719	1.64115	0.0840344	1.04631	0.637545	520.159	5.22868	525.075	6.72843	546.487	27.6324			17.3237	1.55591	0.657098	1.93242	0.0825602	1.14604	0.593057	511.386	5.63424	512.838	7.78076	519.29	34.1588			18.2498	1.34342	0.491678	2.00764
	13.6713	1.1617	1.54735	1.8274	0.153425	1.41062	0.771926	920.136	12.0959	949.436	11.2715	1017.97	23.5256			16.787	1.72558	0.691517	2.08201	0.0841928	1.16496	0.559537	521.101	5.83174	533.712	8.64271	588.008	37.4234			17.1754	2.67894	0.663077	3.06851	0.0825979	1.49634	0.487645	511.611	7.35955	516.494	12.4231	538.177	58.6264			18.0847	1.83533	0.499	2.34797
	13.665	0.989816	1.68873	1.46126	0.167368	1.07496	0.73564	997.591	9.93514	1004.29	9.31928	1018.91	20.0449			17.1315	1.40764	0.679035	1.79976	0.0843697	1.12147	0.623122	522.152	5.62491	526.191	7.3907	543.738	30.7774			17.3346	1.70978	0.657828	2.16375	0.0827037	1.32608	0.612862	512.241	6.52986	513.285	8.71809	517.916	37.5595			18.0456	0.933807	0.50123	1.79839
	13.664	1.31398	1.72091	1.82506	0.170542	1.26661	0.694011	1015.1	11.8962	1016.36	11.7211	1019.07	26.6165			16.948	2.09138	0.6883	2.39097	0.084605	1.15883	0.484668	523.551	5.82721	531.779	9.89796	567.261	45.5353			17.5357	2.16842	0.650552	2.5539	0.0827378	1.34922	0.528296	512.444	6.64631	508.819	10.2212	492.553	47.824			18.2024	1.11744	0.497528	2.03156
	13.6623	1.19007	1.70369	1.58948	0.168816	1.05366	0.662893	1005.58	9.81036	1009.92	10.1703	1019.32	24.0893			17.1374	1.09553	0.681262	1.63481	0.0846758	1.21343	0.742247	523.972	6.10651	527.537	6.72639	542.973	23.9705			17.4357	1.79157	0.655767	2.12647	0.0829254	1.14549	0.538681	513.561	5.65455	512.022	8.55164	505.138	39.4048			18.3028	1.00732	0.49544	1.7798
	13.6605	0.947456	1.76045	1.3619	0.174417	0.97831	0.718344	1036.4	9.36616	1031.01	8.81919	1019.58	19.1847			17.0232	1.56098	0.686477	2.02605	0.0847554	1.29159	0.637492	524.445	6.50545	530.682	8.37403	557.612	34.0468			17.5145	1.86035	0.654159	2.19591	0.0830961	1.16667	0.531291	514.576	5.77003	511.035	8.81781	495.243	41.0046			18.0764	1.02324	0.506666	1.62
	13.6538	0.971872	1.67302	1.64535	0.165674	1.32764	0.806907	988.231	12.164	998.334	10.4569	1020.57	19.676			16.5951	2.31667	0.706978	2.62614	0.0850914	1.23678	0.470951	526.441	6.25218	542.95	11.0444	612.852	50.0561			17.2814	1.96629	0.66319	2.4953	0.0831222	1.5363	0.615676	514.732	7.60034	516.564	10.1033	524.655	43.1216			17.9159	1.38522	0.519755	1.89493
	13.6489	2.61773	1.75844	2.94492	0.174071	1.3491	0.458111	1034.5	12.8942	1030.28	19.0642	1021.3	53.0167			16.8603	2.11887	0.696017	2.41887	0.0851107	1.16676	0.482359	526.556	5.89944	536.409	10.0797	578.508	46.0247			17.2053	1.42572	0.666594	1.93513	0.0831805	1.30846	0.676161	515.079	6.47739	518.639	7.85925	534.331	31.2108			17.8343	1.9705	0.523465	2.24727
	13.6375	1.22411	1.69993	1.76519	0.168137	1.27179	0.720482	1001.84	11.8006	1008.5	11.2854	1023	24.7927			16.8171	1.49429	0.699032	1.79692	0.0852604	0.998015	0.555402	527.446	5.05439	538.212	7.50694	584.075	32.4338			17.5394	1.89903	0.655308	2.48329	0.0833601	1.60013	0.644359	516.148	7.93706	511.74	9.98249	492.118	41.8992			17.7902	1.12914	0.525674	1.62638
	13.6227	1.12672	1.69169	1.70919	0.16714	1.28524	0.751957	996.337	11.8648	1005.4	10.9077	1025.19	22.8132			16.8435	1.40279	0.699442	1.99717	0.0854441	1.42157	0.711793	528.537	7.21377	538.458	8.34643	580.699	30.472			17.2613	1.95463	0.666021	2.49906	0.0833799	1.55715	0.623093	516.265	7.72553	518.29	10.1444	527.247	42.825			17.6644	1.77555	0.530395	2.4596
	13.6117	0.634159	1.62441	1.3701	0.160364	1.2145	0.886433	958.8	10.8201	979.698	8.61105	1026.82	12.8272			16.7976	1.05968	0.708255	1.51559	0.086285	1.08355	0.714937	533.528	5.54829	543.71	6.38049	586.64	22.9951			17.1496	0.884222	0.67044	1.39786	0.0833899	1.08266	0.774515	516.325	5.37204	520.98	5.69673	541.445	19.3447			18.0832	1.50457	0.519619	2.50683
	13.608	0.973297	1.70695	1.74707	0.168467	1.45084	0.830443	1003.66	13.4845	1011.14	11.1866	1027.37	19.7033			16.7224	1.19518	0.715012	1.53263	0.0867185	0.959431	0.626003	536.101	4.93545	547.718	6.48812	596.32	25.8788			17.4423	1.4966	0.659445	1.89213	0.0834223	1.15774	0.61187	516.518	5.74663	514.275	7.63494	504.34	32.9478			17.9457	1.28019	0.533305	1.75627
	13.6066	0.980354	1.75044	1.58764	0.172741	1.2488	0.786577	1027.19	11.8578	1027.33	10.2599	1027.59	19.8453			16.7262	1.67657	0.719726	2.11163	0.0873098	1.28378	0.607959	539.607	6.64537	550.505	8.97359	595.857	36.3363			17.4927	2.07043	0.65784	2.53714	0.0834596	1.46642	0.577983	516.74	7.28184	513.292	10.2227	497.946	45.6273			17.7814	1.2895	0.546512	2.41813
	13.5814	0.874641	1.7206	1.47985	0.169481	1.19371	0.806646	1009.25	11.1518	1016.25	9.5033	1031.33	17.6983			16.5421	2.10215	0.733412	2.42623	0.0879911	1.21143	0.499304	543.645	6.3158	558.554	10.4237	619.758	45.3675			17.2535	1.39518	0.667074	1.79449	0.083474	1.12856	0.628905	516.826	5.605	518.932	7.29116	528.237	30.5559			17.717	1.05927	0.55003	1.82829
	13.5753	1.04512	1.6524	1.8605	0.16269	1.53922	0.827314	971.71	13.884	990.47	11.7694	1032.24	21.1404			16.3022	1.84299	0.753723	2.07547	0.0891165	0.95444	0.459867	550.31	5.03444	570.382	9.05752	651.202	39.5775			17.2964	1.68215	0.665424	2.01091	0.0834743	1.10189	0.547953	516.827	5.47254	517.926	8.15842	522.759	36.895			17.7693	1.1869	0.549716	1.8709
	13.559	1.04827	1.7688	1.52069	0.173942	1.10164	0.724437	1033.8	10.5225	1034.08	9.86442	1034.67	21.1966			16.5192	1.75136	0.744628	2.07602	0.0892129	1.11471	0.536948	550.88	5.88568	565.102	8.99724	622.75	37.766			16.9919	1.2741	0.678127	2.00252	0.0835703	1.54491	0.771485	517.398	7.68098	525.642	8.21678	561.605	27.7493			17.5241	1.57904	0.559788	1.96902
	13.5395	1.01635	1.766	1.3885	0.173417	0.946029	0.68133	1030.91	9.01286	1033.05	9.00176	1037.57	20.5421			16.6833	1.76197	0.746524	2.03492	0.0903283	1.01801	0.500271	557.478	5.43671	566.205	8.83195	601.399	38.1622			17.4247	1.78012	0.661438	2.20958	0.0835897	1.30897	0.592407	517.514	6.50934	515.493	8.93216	506.55	39.1392			17.4941	1.56215	0.569097	2.12399
	13.5327	1.13183	1.86917	1.57433	0.183456	1.0943	0.695088	1085.83	10.9354	1070.24	10.4144	1038.59	22.8716			16.4378	0.852638	0.775283	1.29138	0.0924281	0.969887	0.751045	569.881	5.28994	582.789	5.72641	633.434	18.378			17.2843	1.95115	0.667021	2.33028	0.0836162	1.27407	0.546744	517.671	6.33762	518.9	9.46782	524.289	42.792			17.7489	1.03911	0.571428	1.52555
	13.5288	1.17541	1.72641	1.69012	0.169396	1.21447	0.718568	1008.78	11.3409	1018.42	10.8672	1039.17	23.7484			16.6267	1.15794	0.777036	1.65964	0.0937016	1.18894	0.716384	577.392	6.56637	583.791	7.36878	608.742	25.0549			17.1578	1.95597	0.672532	2.37734	0.0836897	1.35127	0.568396	518.109	6.7271	522.251	9.70674	540.405	42.7811			17.5993	1.48512	0.577004	1.97824
	13.5243	1.06762	1.79278	1.65556	0.175849	1.26533	0.764291	1044.26	12.1986	1042.84	10.7915	1039.84	21.5711			16.4706	1.70306	0.784573	2.44004	0.0937219	1.7474	0.716133	577.512	9.6526	588.089	10.8929	629.107	36.7005			17.207	1.24378	0.671309	1.70067	0.0837772	1.15987	0.682009	518.629	5.77982	521.508	6.93622	534.113	27.2499			17.3753	1.01665	0.592313	1.71598
	13.5225	0.963351	1.78573	1.34435	0.175134	0.937669	0.69749	1040.34	9.00849	1040.27	8.75041	1040.1	19.465			16.5905	1.03621	0.78887	1.76605	0.0949211	1.4301	0.809775	584.576	7.99219	590.53	7.90803	613.459	22.3928			17.34	1.41742	0.666678	1.84197	0.0838426	1.17633	0.638629	519.018	5.86608	518.69	7.48142	517.226	31.1312			17.3189	1.57015	0.609183	2.41672
	13.5221	0.923684	1.75995	1.44804	0.172601	1.11518	0.770131	1026.43	10.5817	1030.83	9.3761	1040.17	18.6636			16.2156	1.427	0.827069	1.81335	0.0972689	1.1189	0.617033	598.384	6.39397	611.985	8.33507	662.628	30.5566			17.4955	1.69478	0.660852	2.13631	0.0838553	1.30059	0.608803	519.093	6.48662	515.135	8.63133	497.612	37.3593			16.8165	1.17417	0.667295	1.85805
	13.5131	1.33917	1.43087	1.97723	0.140234	1.45468	0.735713	845.987	11.5331	901.914	11.8181	1041.51	27.0458			16.1665	1.54681	0.831915	2.13168	0.0975423	1.46678	0.688085	599.99	8.40338	614.674	9.82967	669.14	33.108			17.0182	1.28145	0.679918	1.85325	0.0839204	1.33882	0.722416	519.481	6.68207	526.725	7.61626	558.235	27.9406			16.4855	1.54846	0.683324	2.35511
	13.5066	1.15676	1.77352	1.52284	0.173732	0.990435	0.650386	1032.64	9.45053	1035.81	9.88788	1042.48	23.3607			16.7553	2.57385	0.803694	2.99369	0.0976658	1.52888	0.510701	600.715	8.76929	598.91	13.5454	592.07	55.8272			17.2592	0.831033	0.670541	1.57917	0.0839353	1.34282	0.850331	519.569	6.7031	521.041	6.43624	527.52	18.2119			16.3441	1.31391	0.705791	2.11815
	13.4953	1.11269	1.76265	1.74431	0.172523	1.34333	0.770122	1026	12.7417	1031.82	11.3009	1044.17	22.466			16.2339	1.40048	0.83112	1.77398	0.0978557	1.08887	0.613804	601.83	6.25657	614.233	8.17587	660.213	30.0168			17.0939	0.995428	0.677256	1.56157	0.0839638	1.20317	0.770489	519.739	6.00791	525.115	6.40251	548.578	21.7321			16.7485	3.04914	0.697107	3.44153
	13.4938	1.08277	1.50938	1.6492	0.147718	1.24397	0.754289	888.16	10.3212	934.19	10.0728	1044.39	21.8623			16.3478	1.29995	0.833612	1.75405	0.0988378	1.17764	0.67138	607.594	6.8284	615.614	8.09727	645.242	27.9416			17.3577	0.984529	0.667761	1.52729	0.0840645	1.16761	0.764499	520.338	5.83679	519.35	6.20932	514.989	21.6308			17.1009	1.25849	0.692466	1.77355
	13.4828	1.13212	1.73882	1.95538	0.170033	1.59431	0.815345	1012.3	14.9358	1023.03	12.6059	1046.07	22.8509			16.6148	0.934703	0.820731	1.45508	0.0989	1.11517	0.766395	607.959	6.46989	608.456	6.66008	610.289	20.2224			17.2212	1.58814	0.674227	1.86721	0.084211	0.981982	0.525907	521.209	4.91674	523.279	7.63526	532.345	34.7934			17.1495	2.85694	0.699647	3.6435
	13.48	0.939595	1.82679	1.41339	0.178598	1.05586	0.74704	1059.31	10.3142	1055.13	9.27471	1046.5	18.9666			16.4093	1.19479	0.833468	1.60575	0.0991919	1.07281	0.668102	609.672	6.24083	615.534	7.41194	637.181	25.7089			17.483	1.23528	0.664203	1.72019	0.0842201	1.19714	0.695933	521.263	5.9946	517.182	6.9712	499.17	27.2121			16.6689	1.55569	0.726433	2.17965
	13.4789	0.9289	1.77163	1.28746	0.173191	0.891463	0.692418	1029.67	8.48357	1035.12	8.35626	1046.66	18.7506			16.4558	1.22703	0.831473	1.78173	0.0992354	1.29187	0.725068	609.926	7.5182	614.429	8.21349	631.08	26.4462			17.3225	0.959214	0.67041	1.65967	0.0842267	1.3544	0.816068	521.302	6.78259	520.962	6.76356	519.45	21.0682			17.0575	1.42205	0.712989	2.05729
	13.4777	1.21582	1.74055	1.92144	0.170137	1.48786	0.774346	1012.87	13.9458	1023.67	12.3916	1046.84	24.5373			15.9566	1.17582	0.862806	1.55238	0.0998509	1.01357	0.652916	613.535	5.93188	631.654	7.30099	697.067	25.0322			17.3355	1.35103	0.672477	1.70866	0.0845496	1.04606	0.612212	523.222	5.257	522.217	6.97605	517.806	29.6403			16.6358	2.21193	0.736932	2.62355
	13.4753	1.0785	1.71737	1.51952	0.167843	1.07041	0.704441	1000.21	9.91717	1015.04	9.75136	1047.19	21.7664			16.2889	1.51961	0.848108	1.91108	0.100194	1.15889	0.606406	615.545	6.8035	623.61	8.9052	652.977	32.633			17.3534	1.83979	0.672526	2.29565	0.0846431	1.37302	0.598097	523.778	6.90719	522.247	9.37313	515.538	40.4308			17.0037	1.66973	0.724503	2.21111
	13.4632	1.48102	1.72323	1.94138	0.168265	1.25521	0.646553	1002.54	11.6543	1017.23	12.4745	1049	29.8659			16.2202	1.78877	0.855525	2.29936	0.100644	1.44477	0.628336	618.183	8.51647	627.677	10.7651	662.017	38.334			17.3493	1.67245	0.673183	2.37149	0.084706	1.68134	0.708979	524.151	8.464	522.646	9.68845	516.052	36.7455			16.5843	1.72576	0.755321	2.11466
	13.462	0.846866	1.73386	1.40759	0.169286	1.12434	0.798767	1008.18	10.4934	1021.18	9.06476	1049.19	17.0901			16.2447	1.07674	0.855166	1.40529	0.100754	0.90304	0.642598	618.824	5.32839	627.481	6.57765	658.829	23.0646			17.2606	1.15148	0.676962	1.71369	0.084746	1.26918	0.740615	524.389	6.39195	524.936	7.0244	527.34	25.235			16.7985	1.2296	0.749737	1.58607
	13.4598	1.05024	1.7481	1.6311	0.17065	1.248	0.765125	1015.69	11.7277	1026.46	10.5357	1049.52	21.1889			16.1556	1.54239	0.861065	2.07875	0.100892	1.39364	0.670422	619.635	8.23342	630.704	9.76605	670.599	33.0052			17.0881	1.80263	0.683905	2.08511	0.0847597	1.04797	0.502596	524.47	5.27865	529.132	8.599	549.311	39.3685			16.4816	1.09943	0.769679	1.82044
	13.4557	1.11332	1.68551	1.64953	0.164489	1.21715	0.737879	981.675	11.0832	1003.07	10.5126	1050.13	22.4574			16.4999	1.19485	0.844184	1.61682	0.101022	1.08925	0.673697	620.397	6.44269	621.452	7.51508	625.275	25.7598			17.2299	0.737743	0.678367	1.3627	0.0847707	1.14573	0.840776	524.536	5.77175	525.787	5.59259	531.246	16.1604			16.3374	1.3999	0.776974	1.77795
	13.455	1.13937	1.77874	1.63703	0.173578	1.17545	0.718042	1031.8	11.2075	1037.72	10.6406	1050.24	22.9831			16.4115	0.997715	0.852049	1.44035	0.101417	1.03884	0.721238	622.709	6.16633	625.773	6.72849	636.885	21.4884			17.4234	1.43155	0.670952	1.84383	0.0847857	1.16206	0.630241	524.625	5.85497	521.291	7.51773	506.709	31.4986			16.6634	1.55703	0.778934	1.97484
	13.4516	0.753036	1.75029	1.32424	0.170758	1.08929	0.822577	1016.29	10.2418	1027.27	8.55736	1050.75	15.1948			16.5513	1.49306	0.845693	2.16543	0.101518	1.56839	0.724287	623.3	9.31805	622.282	10.0749	618.564	32.2123			17.4741	1.25427	0.669367	1.84847	0.0848318	1.35781	0.734557	524.899	6.84467	520.327	7.52597	500.329	27.6227			16.8624	1.21736	0.775467	1.80189
	13.4316	1.13295	1.79373	1.56722	0.174737	1.08287	0.690948	1038.16	10.3834	1043.18	10.2176	1053.74	22.8415			16.2907	1.12661	0.86111	1.59211	0.101741	1.12498	0.706596	624.606	6.69702	630.729	7.47994	652.733	24.1917			16.8668	2.3375	0.694155	2.81029	0.0849156	1.56008	0.555131	525.397	7.8715	535.294	11.6924	577.691	50.7842			16.8367	1.02559	0.778361	1.56493
	13.43	1.25382	1.79904	1.64486	0.175233	1.06467	0.647267	1040.88	10.2335	1045.11	10.7351	1053.99	25.2622			16.4397	1.16886	0.858911	1.77573	0.10241	1.33679	0.752808	628.516	8.00534	629.528	8.3312	633.187	25.1821			17.0761	1.37974	0.685939	1.92876	0.0849519	1.34775	0.698764	525.613	6.80283	530.357	7.96819	550.811	30.125			16.3271	1.25094	0.803722	2.24703
	13.4274	0.999416	1.81037	1.29884	0.176302	0.829545	0.638683	1046.74	8.01487	1049.21	8.49569	1054.38	20.15			16.3547	1.29954	0.874814	1.86968	0.103767	1.34421	0.718952	636.446	8.1464	638.178	8.8586	644.337	27.9512			17.3974	1.5535	0.674629	1.97377	0.0851233	1.21754	0.61686	526.631	6.15701	523.523	8.07386	509.991	34.1367			16.4432	0.995363	0.806536	1.85307
	13.4235	2.37298	1.68974	2.98629	0.164507	1.81298	0.607101	981.773	16.5102	1004.66	19.0512	1054.96	47.8117			16.2467	1.09484	0.883608	1.5133	0.104117	1.0447	0.690348	638.493	6.35067	642.929	7.20829	658.525	23.4548			17.2596	1.56529	0.680498	1.90505	0.0851835	1.08586	0.569988	526.988	5.49469	527.075	7.83311	527.473	34.3011			16.4715	1.449	0.806458	2.16093
	13.414	1.1251	1.85293	1.4432	0.180267	0.903867	0.626295	1068.44	8.89938	1064.47	9.51778	1056.38	22.6687			16.3288	2.16727	0.879763	2.52599	0.104189	1.29751	0.513666	638.909	7.89236	640.855	12.0045	647.741	46.5669			17.3649	1.44339	0.677664	1.93738	0.0853467	1.2923	0.667037	527.958	6.55088	525.362	7.94625	514.09	31.6894			16.5883	1.2055	0.807201	1.75311
	13.4135	1.45483	1.81985	1.94526	0.177042	1.29132	0.663831	1050.79	12.521	1052.63	12.7479	1056.46	29.305			16.2727	1.02249	0.888631	1.49342	0.104877	1.08848	0.728856	642.926	6.66049	645.633	7.13497	655.095	21.9195			17.2863	2.04648	0.682008	2.45708	0.0855048	1.35984	0.553439	528.897	6.90504	527.987	10.1164	524.034	44.9055			16.4539	1.64257	0.816485	2.15932
	13.4079	0.751163	1.76478	1.12165	0.171613	0.832973	0.742635	1020.99	7.86529	1032.61	7.26982	1057.31	15.1423			16.533	1.05845	0.885274	1.38988	0.106152	0.900802	0.648117	650.361	5.57264	643.827	6.62697	620.953	22.8543			17.1688	1.23695	0.691067	1.66257	0.0860515	1.11089	0.668179	532.143	5.67412	533.442	6.89883	538.979	27.0802			16.4355	1.03094	0.822786	1.51248
	13.407	2.35057	1.7512	2.86427	0.170281	1.63673	0.57143	1013.66	15.3523	1027.6	18.5142	1057.43	47.3285			15.6262	0.895026	1.02156	1.43735	0.115776	1.12468	0.782467	706.203	7.52293	714.7	7.37528	741.452	18.9324			16.3076	1.3029	0.733228	1.7558	0.0867217	1.17697	0.670337	536.12	6.05473	558.446	7.54215	650.519	27.9736			16.6104	1.12616	0.817474	1.76527
	13.4009	0.986707	1.78862	1.63412	0.17384	1.3026	0.797124	1033.24	12.4357	1041.32	10.6429	1058.35	19.8811			15.5524	1.49436	1.03865	2.04615	0.117156	1.39772	0.683096	714.174	9.44908	723.245	10.5855	751.455	31.5585			17.2603	2.3809	0.69688	2.70495	0.087238	1.28377	0.474599	539.182	6.64028	536.926	11.2801	527.376	52.1855			16.2779	1.4116	0.838785	1.91462
	13.3969	0.698029	1.76397	1.29526	0.171394	1.09107	0.842362	1019.79	10.2912	1032.31	8.3937	1058.95	14.0695			15.7115	1.4234	1.03835	1.94478	0.118321	1.32519	0.681405	720.891	9.03836	723.097	10.0596	729.966	30.165			17.2916	1.36041	0.705066	1.88498	0.0884225	1.30477	0.692192	546.201	6.83308	541.812	7.91467	523.368	29.8289			16.3231	1.09982	0.840691	1.628
	13.3881	0.91484	1.93594	1.30135	0.18798	0.925516	0.711197	1110.42	9.44069	1093.6	8.71324	1060.27	18.4265			14.4631	1.71754	1.27378	2.01867	0.133615	1.06069	0.525442	808.454	8.05931	834.08	11.4831	902.946	35.3958			17.2422	1.29629	0.716618	1.63819	0.0896149	1.00166	0.61144	553.259	5.31061	548.669	6.9441	529.674	28.4093			16.5995	1.38864	0.827853	2.45801
	13.3794	1.13277	1.70874	1.65306	0.16581	1.20393	0.728305	988.984	11.0384	1011.81	10.5887	1061.59	22.8111			14.1555	1.49283	1.51664	2.18208	0.155706	1.59152	0.729359	932.871	13.8226	937.123	13.3533	947.147	30.5563			16.7811	1.61586	0.752937	2.13326	0.0916388	1.39276	0.652881	565.222	7.53695	569.927	9.30416	588.743	35.0335			16.1299	3.0066	0.854883	3.2754
	13.3736	1.19241	1.92441	1.63145	0.186657	1.11345	0.682493	1103.24	11.2904	1089.6	10.9013	1062.46	23.9989			14.0345	1.24587	1.60423	1.68763	0.16329	1.13838	0.674543	975.037	10.301	971.859	10.5563	964.702	25.4591			17.1167	1.88318	0.741492	2.29811	0.0920502	1.31718	0.573156	567.651	7.15722	563.276	9.93573	545.638	41.1538			16.4266	1.26523	0.850776	1.66565
	13.3717	1.04018	1.90059	1.60719	0.18432	1.22519	0.762317	1090.53	12.2921	1081.3	10.6934	1062.75	20.9261			13.9457	0.63004	1.63407	1.19622	0.165276	1.01685	0.850056	986.029	9.2973	983.428	7.53515	977.633	12.8392			16.842	0.942465	0.762175	1.68396	0.0930997	1.39552	0.828714	573.843	7.66201	575.264	7.39562	580.887	20.4716			16.6461	1.39873	0.841058	2.30213
	13.3645	1.00516	1.8025	1.63347	0.174714	1.28759	0.788254	1038.03	12.345	1046.36	10.6681	1063.83	20.2178			13.9088	1.28222	1.58925	1.85365	0.160318	1.33863	0.722158	958.542	11.9229	966.004	11.553	983.043	26.1092			16.9027	1.09568	0.764141	1.67985	0.093676	1.27334	0.758006	577.241	7.03076	576.396	7.38838	573.046	23.8302			16.3313	1.2645	0.859195	1.95977
	13.3643	0.716559	1.78093	1.27592	0.17262	1.05571	0.827408	1026.53	10.0183	1038.52	8.29698	1063.86	14.4096			13.8468	1.01067	1.58296	1.58413	0.158971	1.21985	0.770041	951.055	10.7862	963.533	9.85795	992.104	20.5509			16.9523	2.53423	0.762103	2.81159	0.0937002	1.21767	0.433089	577.383	6.72496	575.223	12.3477	566.716	55.1708			16.4093	1.55874	0.862674	2.27211
	13.3639	2.27015	1.80439	3.14871	0.174888	2.18192	0.692958	1038.99	20.9374	1047.05	20.5738	1063.92	45.665			13.8126	1.03068	1.65197	1.56589	0.165491	1.17886	0.752836	987.221	10.7906	990.305	9.9046	997.122	20.9217			16.7422	1.10137	0.773131	1.7676	0.0938784	1.38253	0.782152	578.434	7.64874	581.558	7.82591	593.797	23.8506			16.3525	2.05407	0.870583	2.5924
	13.3611	1.02961	1.78798	1.57595	0.173262	1.19311	0.757077	1030.06	11.3581	1041.09	10.2626	1064.34	20.7276			13.7827	1.43385	1.6751	1.93906	0.167445	1.30539	0.673208	998.018	12.0697	999.122	12.3294	1001.53	29.113			16.3177	1.30955	0.80404	1.93267	0.0951556	1.42138	0.735446	585.956	7.96134	599.105	8.74642	649.201	28.1302			16.348	1.13352	0.872884	1.59865
	13.3502	0.982288	1.79698	1.34343	0.173992	0.916466	0.682185	1034.07	8.75588	1044.36	8.76414	1065.98	19.7326			13.7815	1.22467	1.6755	1.66288	0.167471	1.12488	0.676466	998.164	10.4021	999.275	10.5742	1001.69	24.857			16.717	1.45528	0.785372	1.92991	0.0952208	1.26757	0.656803	586.34	7.10431	588.543	8.62035	597.07	31.5251			16.4212	1.20944	0.870927	1.93893
	13.3383	1.13636	1.68515	1.87932	0.163019	1.49683	0.796477	973.532	13.5252	1002.93	11.9762	1067.77	22.8253			13.7203	0.855974	1.76965	1.40685	0.176095	1.11649	0.793606	1045.61	10.7765	1034.39	9.12751	1010.73	17.3361			16.6976	1.29695	0.795159	1.84109	0.0962956	1.30673	0.709757	592.663	7.39917	594.094	8.28069	599.584	28.0626			15.9693	1.63786	0.89588	2.08902
	13.3274	0.846678	1.81234	1.80306	0.175179	1.59191	0.882891	1040.58	15.2973	1049.92	11.7986	1069.42	16.9976			13.6628	1.34254	1.69341	1.93683	0.167803	1.39603	0.720778	999.994	12.9313	1006.05	12.3652	1019.24	27.192			16.7889	0.931917	0.791553	1.39337	0.0963832	1.03586	0.743422	593.178	5.87029	592.053	6.25104	587.746	20.1975			16.2446	1.43398	0.888828	1.89616
	13.3236	0.837372	1.84161	1.55807	0.177959	1.31392	0.843301	1055.81	12.7961	1060.44	10.2533	1069.98	16.8211			13.641	1.26305	1.75867	1.81335	0.173992	1.30113	0.717527	1034.07	12.4309	1030.36	11.7386	1022.47	25.5823			16.8493	1.75432	0.797903	2.5152	0.0975057	1.80238	0.716598	599.775	10.3226	595.645	11.3345	579.929	38.1088			16.5071	1.1724	0.879773	1.83117
	13.3214	1.2032	1.82532	1.58053	0.176354	1.02489	0.648447	1047.03	9.90477	1054.6	10.3686	1070.32	24.1773			13.6209	0.908704	1.68653	1.65872	0.166609	1.38767	0.836588	993.399	12.7755	1003.45	10.5736	1025.46	18.3835			16.6929	1.46116	0.809092	1.93465	0.0979557	1.26802	0.655428	602.418	7.29273	601.945	8.78577	600.143	31.6364			16.0684	1.62964	0.905386	1.88
	13.3202	0.976653	1.77597	1.76376	0.171572	1.46867	0.832694	1020.77	13.8651	1036.71	11.458	1070.49	19.6217			13.6102	0.774653	1.69193	1.25229	0.167012	0.983941	0.785714	995.626	9.07736	1005.49	7.99213	1027.04	15.6676			16.6282	1.82714	0.825253	2.19543	0.0995246	1.21716	0.554406	611.622	7.10218	610.975	10.0792	608.557	39.5053			16.2836	0.978262	0.896224	1.32966
	13.3069	1.49378	1.82016	1.90411	0.175666	1.1808	0.62013	1043.25	11.3736	1052.74	12.479	1072.5	30.026			13.595	1.10894	1.65313	1.57396	0.162999	1.11696	0.709652	973.421	10.0917	990.75	9.95831	1029.3	22.4412			16.5755	1.29133	0.834172	1.52912	0.100281	0.81895	0.535569	616.058	4.81163	615.924	7.06146	615.414	27.8976			16.3943	1.01291	0.894105	1.60966
	13.3033	1.08961	1.8553	1.53108	0.179009	1.07561	0.702518	1061.56	10.5276	1065.32	10.1019	1073.05	21.8864			13.5852	1.28496	1.76799	2.01487	0.174198	1.55195	0.770252	1035.2	14.8422	1033.78	13.0682	1030.77	25.9938			16.2591	1.74391	0.853528	2.26069	0.10065	1.43859	0.636347	618.216	8.48044	626.584	10.5708	656.904	37.4243			15.1596	1.18698	0.969765	2.53453
[truncated: 187 more rows]
[truncated: 9 more columns]

## Sheet: F. Chukar Trail, CO
	F. Chukar Trail, CO
						CO16-CT-1Jes															CO16-CT-2Jw
				Isotope ratios						Apparent ages (Ma)									Isotope ratios						Apparent ages (Ma)
[truncated: 281 more rows]

## Sheet: G. Sawpit, CO
	G. Sawpit, CO
[truncated: 302 more rows]
[truncated: 22 more columns]

[truncated: 1 more sheets: Potter-McIntyre et al., 2016]
