# Supplementary material
Source: publisher figshare collection journal article supplement (https://gsapubs.figshare.com/articles/dataset/_/14471031)

Figure S2. Chondrite-normalized, mean LREE and HREE concentration ratio in detrital zircons from seven Middle-Upper Jurassic sandstone samples (**A** and **B**) and Cambrian zircons (**C**) from five potential igneous sources Colorado (CO), New Mexico (NM), and Oklahoma (OK). **A.** Sandstone samples (n=3) that have a major Cambrian peak. **B.** Sandstone samples (n=4) that have minor or no Cambrian peak. Refer to Figs. 7 and 8 captions for full sample names. Chondrite normalization values are from McDonough and Sun (1995).

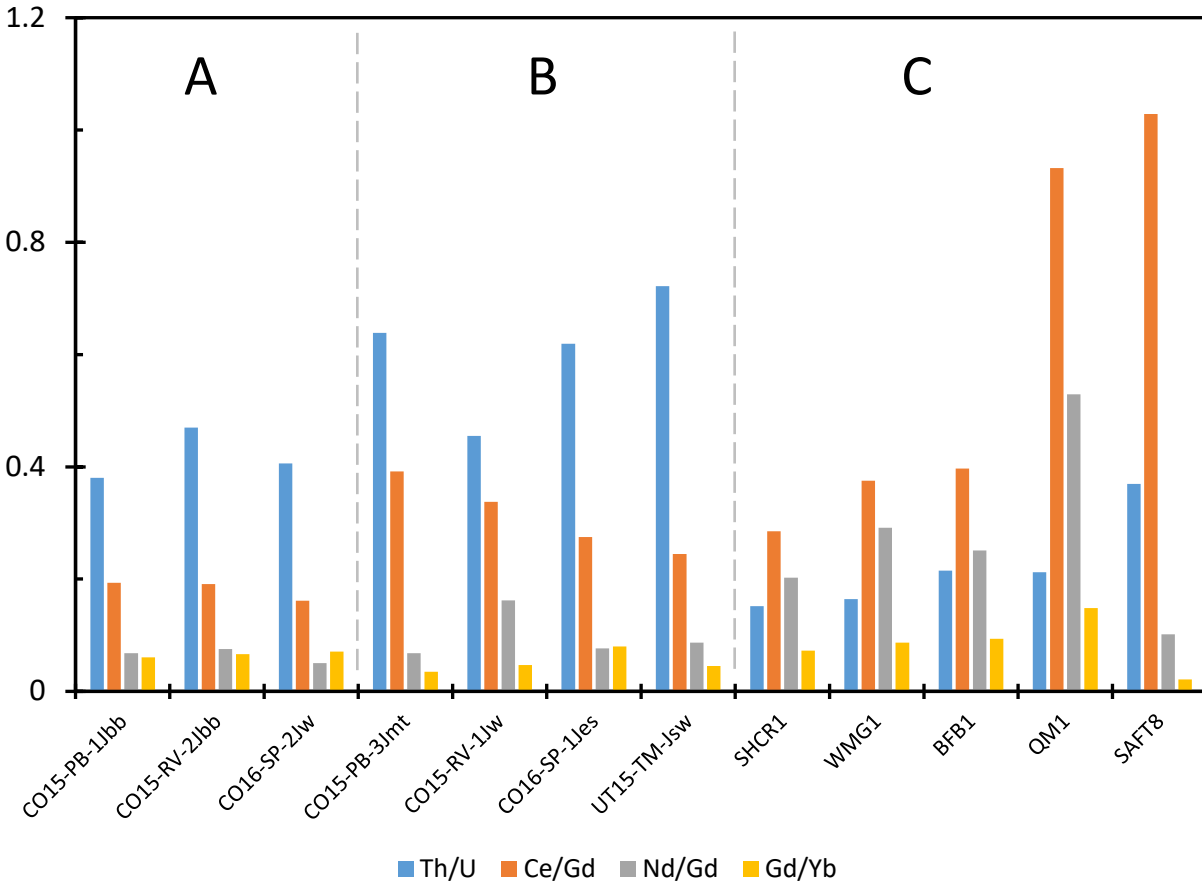

Supplement: Supplementary file 1 [file 2]
