# Supplementary material
Source: publisher figshare collection journal article supplement (https://gsapubs.figshare.com/articles/dataset/_/14471031)

Figure S1. Chondrite-normalized REE patterns in detrital zircons from seven sandstone (Middle-Upper Jurassic) samples in the Paradox Basin. See Fig. 8 caption for full sample names. Plots are color-coded according to the geologic age of zircons. Upper and lower panels represent samples that contain high and low Cambrian grain populations, respectively, and n is the number of analyses per sample. Chondrite normalization values are from McDonough and Sun (1995).

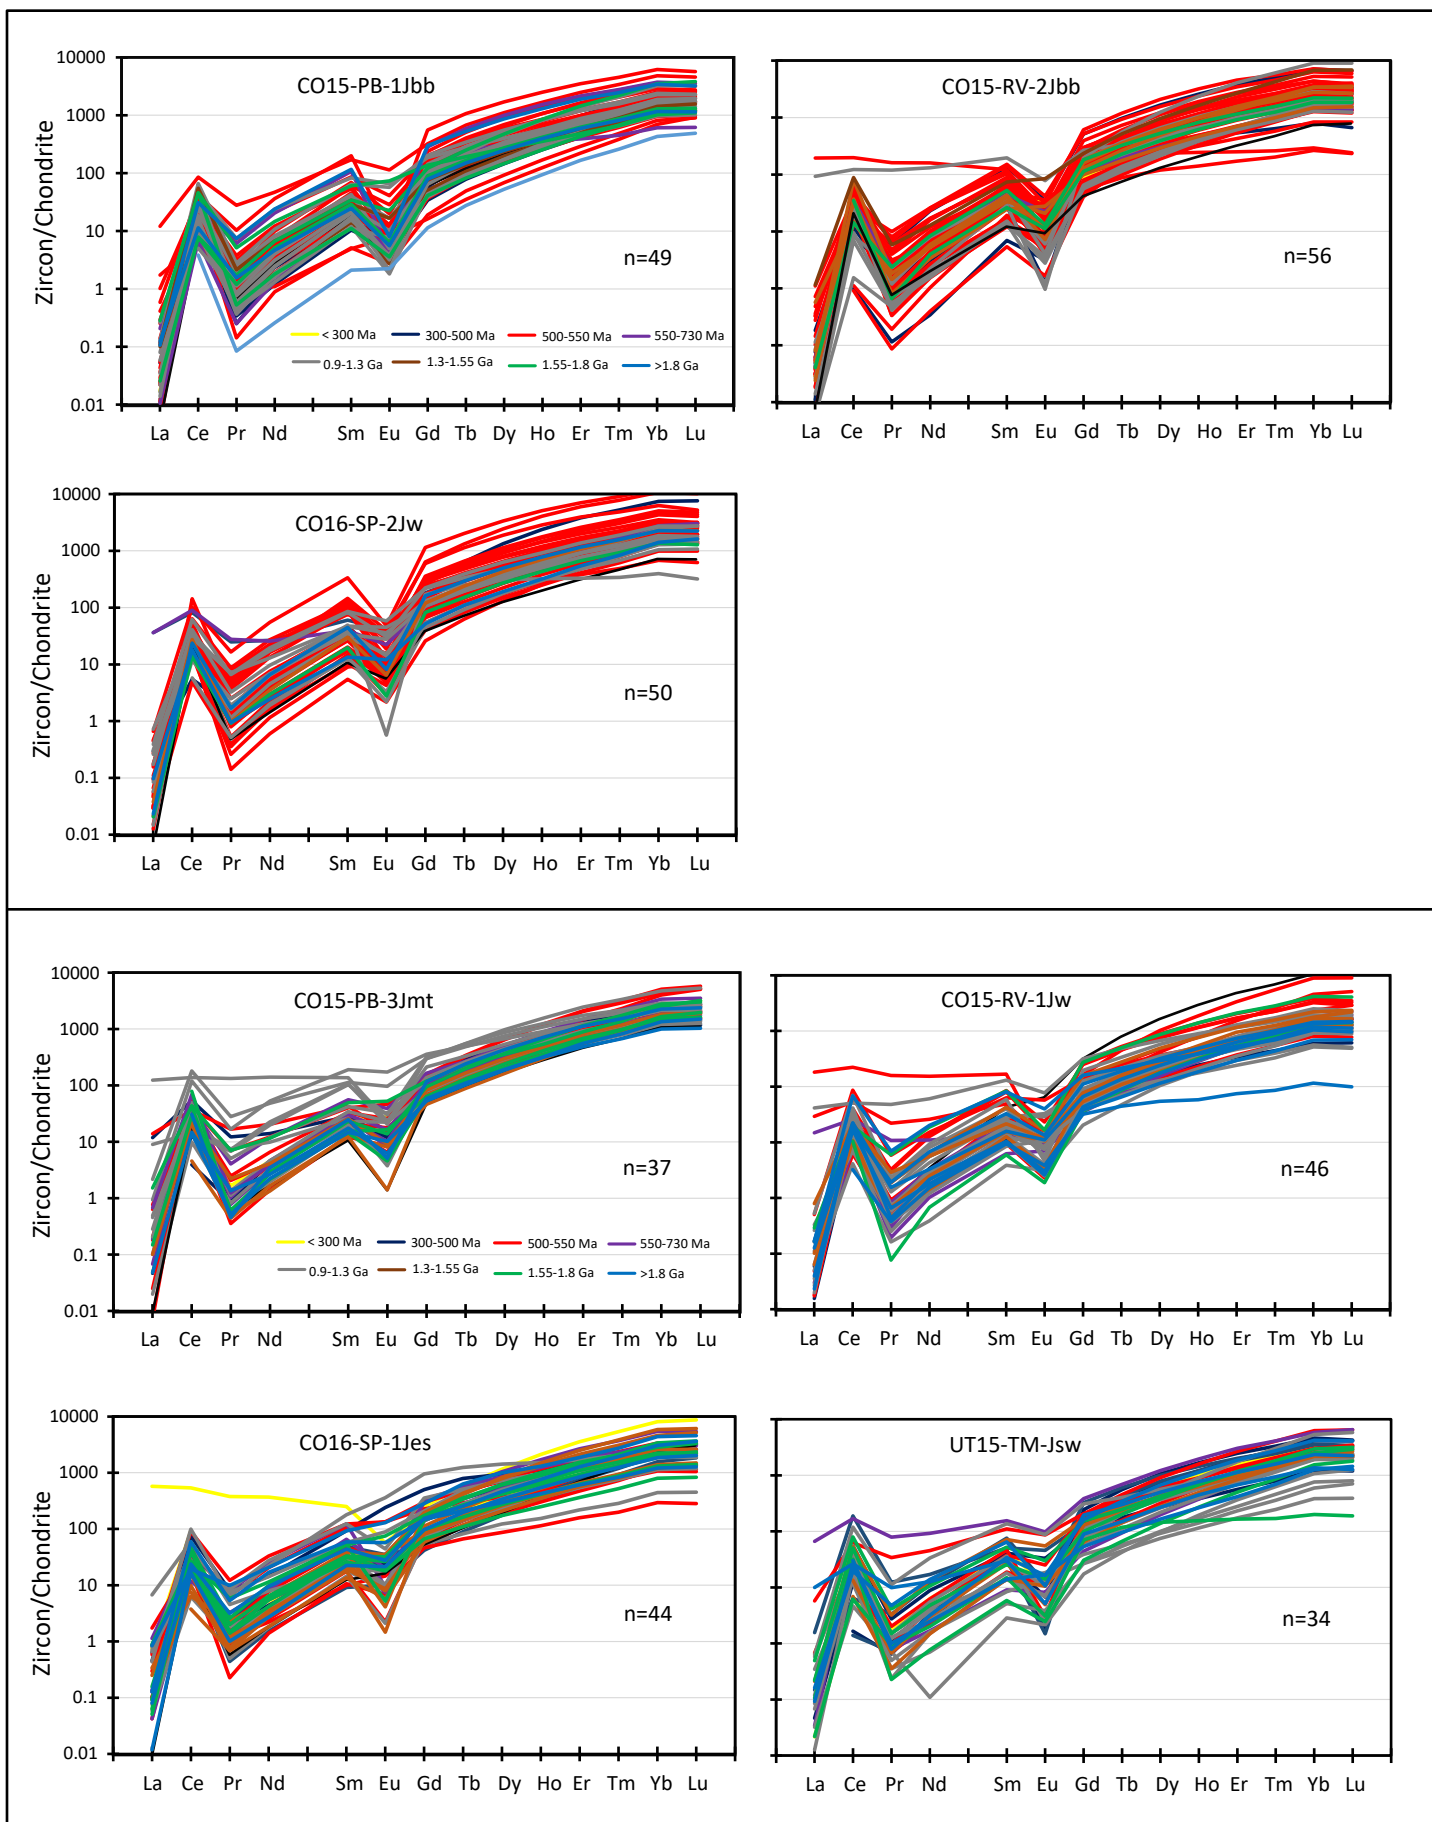

Supplement: Supplementary file 2 [file 2]
