# Supplementary material
Source: publisher figshare collection journal article supplement (https://gsapubs.figshare.com/articles/dataset/_/14471031)
Supplement: Supplementary file 3 [file 2]

Table S1. Major peaks of age clusters of detrital zircon and their grain percentages in the Middle–Upper Jurassic strata, Paradox Basin, western United States.

Samples in this table are arranged stratigraphically in each field location from oldest to youngest, and are all listed from east to west as shown in Fig. 5. Age categories are color coded in both in the U-Pb detrital zircon age spectra (Fig. 5) and the basement age province map of Laurentia (Fig. 9). *p* – Statistical peaks of grain ages. Peaks reported herein are defined by ≥ 3 grains and are shown in Fig. 5A – G.

| Field Location /Sample         | Total Grains | Cordilleran Arc (< 300 Ma) | Paleozoic App. (500 – 300 Ma) | Cambrian (~540 – 500 Ma) | Neoproterozoic App. (730 – 540 Ma) | Grenville (1.3 – 0.9 Ga)     | Anorogenic Craton (1.53 – 1.3 Ga) | Yavapai-Mazatzal (1.8 – 1.55 Ga) | Paleoproterozoic SB (2.0 – 1.8 Ga) | Wopmay Orogeny (2.3 – 2.0 Ga) | Archean Craton (3.2 – 2.4 Ga) |
|--------------------------------|--------------|----------------------------|-------------------------------|--------------------------|------------------------------------|------------------------------|-----------------------------------|----------------------------------|------------------------------------|-------------------------------|-------------------------------|
| <b>A. Ten Mile Graben, UT</b>  |              |                            |                               |                          |                                    |                              |                                   |                                  |                                    |                               |                               |
| Jsw                            | 248          | 4% ( <i>p</i> : 169)       | 23% ( <i>p</i> : 334, 369)    | 2% ( <i>p</i> : 524)     | 11% ( <i>p</i> : 591, 627)         | 35% ( <i>p</i> : 1036, 1146) | 10% ( <i>p</i> : 1454)            | 9% ( <i>p</i> : 1769)            | -                                  | 3% ( <i>p</i> : 2014)         | 2% ( <i>p</i> : 2755)         |
| 3Jmt                           | 220          | 1% ( <i>p</i> : 256)       | 13% ( <i>p</i> : 333, 413)    | -                        | 12% ( <i>p</i> : 597)              | 35% ( <i>p</i> : 1027, 1157) | 13% ( <i>p</i> : 1326, 1465)      | 11% ( <i>p</i> : 1619)           | 9% ( <i>p</i> : 1806, 1992)        | 3% ( <i>p</i> : 2044, 2140)   | 3% ( <i>p</i> : 2745)         |
| Jsv                            | 156          | 2% ( <i>p</i> : 153)       | 20% ( <i>p</i> : 355, 414)    | -                        | 18% ( <i>p</i> : 544, 620)         | 31% ( <i>p</i> : 1050, 1219) | 14% ( <i>p</i> : 1320, 1461)      | 4% ( <i>p</i> : 1725)            | 7% ( <i>p</i> : 1840, 1965)        | -                             | 4% ( <i>p</i> : 2696)         |
| <b>B. Dewey Bridge, UT</b>     |              |                            |                               |                          |                                    |                              |                                   |                                  |                                    |                               |                               |
| 5Jsw                           | 152          | 5% ( <i>p</i> : 235)       | 15% ( <i>p</i> : 401)         | -                        | 13% ( <i>p</i> : 592)              | 34% ( <i>p</i> : 1043, 1162) | 17% ( <i>p</i> : 1442)            | 8% ( <i>p</i> : 1650)            | 2%                                 | -                             | 5% ( <i>p</i> : 2763)         |
| 4Jmt                           | 87           | -                          | 21% ( <i>p</i> : 338, 425)    | 5% ( <i>p</i> : 526)     | 16% ( <i>p</i> : 594, 635)         | 32% ( <i>p</i> : 1021, 1148) | 12% ( <i>p</i> : 1425)            | 10% ( <i>p</i> : 1628, 1690)     | 3% ( <i>p</i> : 1888)              | -                             | 3% ( <i>p</i> : 2756)         |
| 3Jmt                           | 195          | -                          | 15% ( <i>p</i> : 413)         | 6% ( <i>p</i> : 520)     | 7% ( <i>p</i> : 615)               | 39% ( <i>p</i> : 1028, 1168) | 14% ( <i>p</i> : 1439)            | 14% ( <i>p</i> : 1696)           | 2% ( <i>p</i> : 1897)              | -                             | 6% (2731)                     |
| 2Jw                            | 145          | 2% ( <i>p</i> : 165)       | 12% ( <i>p</i> : 376, 421)    | 8% ( <i>p</i> : 526)     | 14% ( <i>p</i> : 616)              | 28% ( <i>p</i> : 1036, 1164) | 12% ( <i>p</i> : 1465)            | 9% ( <i>p</i> : 1575, 1707)      | 5% ( <i>p</i> : 1876)              | 4% ( <i>p</i> : 2028, 2087)   | 4% ( <i>p</i> : 2708)         |
| 1Jes                           | 60           | -                          | 10% ( <i>p</i> : 426)         | 10% ( <i>p</i> : 523)    | 8% ( <i>p</i> : 599)               | 38% ( <i>p</i> : 1039, 1138) | 15% ( <i>p</i> : 1409)            | 12% ( <i>p</i> : 1663)           | 7% ( <i>p</i> : 1880)              | -                             | -                             |
| <b>C. Rabbit Valley, CO</b>    |              |                            |                               |                          |                                    |                              |                                   |                                  |                                    |                               |                               |
| 1Jmt                           | 256          | 2% ( <i>p</i> : 161, 173)  | 13% ( <i>p</i> : 408)         | -                        | 7% ( <i>p</i> : 605)               | 42% ( <i>p</i> : 1020, 1072) | 15% ( <i>p</i> : 1465)            | 10% ( <i>p</i> : 1613, 1644)     | 7% ( <i>p</i> : 1804, 1981)        | 4% ( <i>p</i> : 2044, 2119)   | 1% ( <i>p</i> : 2688)         |
| 1Jw                            | 268          | 2% ( <i>p</i> : 158)       | 12% ( <i>p</i> : 379, 405)    | 3% ( <i>p</i> : 518)     | 6% ( <i>p</i> : 596)               | 58% ( <i>p</i> : 1024, 1062) | 9% ( <i>p</i> : 1480)             | 8% ( <i>p</i> : 1622, 1807)      | 3% ( <i>p</i> : 1991)              | -                             | 3% ( <i>p</i> : 2700)         |
| 3Jbb                           | 240          | 3% ( <i>p</i> : 164, 237)  | 11% ( <i>p</i> : 375, 422)    | 13% ( <i>p</i> : 530)    | 5% ( <i>p</i> : 609)               | 35% ( <i>p</i> : 1041, 1165) | 10% ( <i>p</i> : 1427)            | 6% ( <i>p</i> : 1691)            | 9% ( <i>p</i> : 1803, 1876)        | 1% ( <i>p</i> : 2060)         | 7% ( <i>p</i> : 2735)         |
| 2Jbb                           | 223          | 1% ( <i>p</i> : 236)       | 11% ( <i>p</i> : 417)         | 31% ( <i>p</i> : 512)    | 4% ( <i>p</i> : 618)               | 16% ( <i>p</i> : 1046)       | 15% ( <i>p</i> : 1436)            | 14% ( <i>p</i> : 1613, 1675)     | 4% ( <i>p</i> : 1834)              | -                             | 3% ( <i>p</i> : 2649)         |
| 1Jbb                           | 217          | 1% ( <i>p</i> : 251)       | 7% ( <i>p</i> : 307, 412)     | 27% ( <i>p</i> : 516)    | 6% ( <i>p</i> : 588)               | 25% ( <i>p</i> : 1061, 1150) | 10% ( <i>p</i> : 1444)            | 12% ( <i>p</i> : 1546, 1707)     | 3% ( <i>p</i> : 1846)              | 2% ( <i>p</i> : 2100)         | 6% ( <i>p</i> : 2699)         |
| 1Jes                           | 226          | 6% ( <i>p</i> : 165, 249)  | 9% ( <i>p</i> : 361, 414)     | 4% ( <i>p</i> : 530)     | 9% ( <i>p</i> : 600)               | 25% ( <i>p</i> : 1053, 1132) | 13% ( <i>p</i> : 1455)            | 13% ( <i>p</i> : 1639, 1767)     | 5% ( <i>p</i> : 1869, 1983)        | 1% ( <i>p</i> : 2079)         | 2% ( <i>p</i> : 2679)         |
| <b>D. Pollock Bench, CO</b>    |              |                            |                               |                          |                                    |                              |                                   |                                  |                                    |                               |                               |
| Jsw                            | 211          | 1% ( <i>p</i> : 217)       | 20% ( <i>p</i> : 422, 471)    | -                        | 14% ( <i>p</i> : 567,616)          | 29% ( <i>p</i> : 1041, 1139) | 14% ( <i>p</i> : 1380, 1496)      | 9% ( <i>p</i> : 1641, 1741)      | 7% ( <i>p</i> : 1867)              | 2% ( <i>p</i> : 2084)         | 2% ( <i>p</i> : 2686)         |
| 5Jmt                           | 202          | 8% ( <i>p</i> : 158, 234)  | 16% ( <i>p</i> : 375, 454)    | -                        | 15% ( <i>p</i> : 549, 616)         | 33% ( <i>p</i> : 1030, 1193) | 9% ( <i>p</i> : 1439)             | 11% ( <i>p</i> : 1634, 1766)     | 3% ( <i>p</i> : 1874)              | 3% ( <i>p</i> : 2097)         | 1% ( <i>p</i> : 2717)         |
| 3Jmt                           | 228          | 2% ( <i>p</i> : 242)       | 12% ( <i>p</i> : 336, 417)    | 4% ( <i>p</i> : 527)     | 9% ( <i>p</i> : 596)               | 31% ( <i>p</i> : 1047, 1160) | 15% ( <i>p</i> : 1358, 1478)      | 13% ( <i>p</i> : 1649, 1718)     | 3% ( <i>p</i> : 1901)              | 3% ( <i>p</i> : 2065)         | 5% ( <i>p</i> : 2519, 2691)   |
| 4Jw                            | 216          | 4% ( <i>p</i> : 162, 261)  | 21% ( <i>p</i> : 371, 419)    | -                        | 18% ( <i>p</i> : 567, 606)         | 21% ( <i>p</i> : 1040, 1168) | 14% ( <i>p</i> : 1463, 1496)      | 11% ( <i>p</i> : 1615, 1764)     | 1% ( <i>p</i> : 1944)              | 2% ( <i>p</i> : 2123)         | 2% ( <i>p</i> : 2720)         |
| 2Jw                            | 145          | -                          | 20% ( <i>p</i> : 379, 411)    | 6% ( <i>p</i> : 530)     | 5% ( <i>p</i> : 594)               | 43% ( <i>p</i> : 1038, 1130) | 7% ( <i>p</i> : 1432)             | 7% ( <i>p</i> : 1628)            | 4% ( <i>p</i> : 1803)              | 3% ( <i>p</i> : 2120)         | 3% ( <i>p</i> : 2684)         |
| 1Jbb                           | 264          | 2% ( <i>p</i> : 220)       | 12% ( <i>p</i> : 385, 430)    | 15% ( <i>p</i> : 520)    | 5% ( <i>p</i> : 600)               | 38% ( <i>p</i> : 1030, 1159) | 8% ( <i>p</i> : 1438)             | 11% ( <i>p</i> : 1635, 1767)     | 3% ( <i>p</i> : 1877)              | 2% ( <i>p</i> : 2084)         | 2% ( <i>p</i> : 2738)         |
| <b>X. Escalante Canyon, CO</b> |              |                            |                               |                          |                                    |                              |                                   |                                  |                                    |                               |                               |
| Jms                            | 79           | 12% ( <i>p</i> : 167, 176) | 17% ( <i>p</i> : 374, 413)    | -                        | 14% ( <i>p</i> : 593, 622)         | 32% ( <i>p</i> : 1052, 1142) | 16% ( <i>p</i> : 1419, 1476)      | 8% ( <i>p</i> : 1563, 1635)      | -                                  | -                             | -                             |
| 2Jmt                           | 78           | 3% ( <i>p</i> : 299)       | 26% ( <i>p</i> : 369, 414)    | -                        | 8% ( <i>p</i> : 548, 599)          | 38% ( <i>p</i> : 1058, 1166) | 13% ( <i>p</i> : 1460, 1490)      | 10% ( <i>p</i> : 1706, 1747)     | 3% ( <i>p</i> : 1885)              | -                             | -                             |
| 1Jmt                           | 83           | -                          | 4% ( <i>p</i> : 426)          | 11% ( <i>p</i> : 523)    | 3% ( <i>p</i> : 637)               | 51% ( <i>p</i> : 1034, 1134) | 15% ( <i>p</i> : 1338, 1447)      | 8% ( <i>p</i> : 1691, 1752)      | 7% ( <i>p</i> : 1801, 1829)        | -                             | -                             |
| 3Jw                            | 92           | -                          | -                             | 55% ( <i>p</i> : 523)    | 3% ( <i>p</i> : 569)               | 18% ( <i>p</i> : 1098, 1160) | 8% ( <i>p</i> : 1433, 1516)       | 6% ( <i>p</i> : 1687, 1744)      | 6% ( <i>p</i> : 1809, 1834)        | -                             | -                             |
| 2Jw                            | 101          | -                          | -                             | 65% ( <i>p</i> : 527)    | -                                  | 6% ( <i>p</i> : 1099, 11557) | 16% ( <i>p</i> : 1435, 1498)      | 10% ( <i>p</i> : 1667, 1698)     | 3% ( <i>p</i> : 1801)              | -                             | -                             |
| Jeef                           | 78           | -                          | 15% ( <i>p</i> : 456, 479)    | 18% ( <i>p</i> : 519)    | 11% ( <i>p</i> : 562, 599)         | 32% ( <i>p</i> : 1072, 1157) | 10% ( <i>p</i> : 1360, 1444)      | 13% ( <i>p</i> : 1663, 1691)     | -                                  | -                             | -                             |
| Jebb                           | 72           | 3% ( <i>p</i> : 165)       | 9% ( <i>p</i> : 443, 465)     | 5% ( <i>p</i> : 541)     | 4% ( <i>p</i> : 577)               | 45% ( <i>p</i> : 997, 1047)  | 3% ( <i>p</i> : 1389)             | 11% ( <i>p</i> : 1692, 1735)     | -                                  | 3% ( <i>p</i> : 2066)         | -                             |
| <b>E. Duncan Trail, CO</b>     |              |                            |                               |                          |                                    |                              |                                   |                                  |                                    |                               |                               |
| 1Jmt                           | 280          | 5% ( <i>p</i> : 156, 223)  | 25% ( <i>p</i> : 402, 420)    | -                        | 13% ( <i>p</i> : 603, 645)         | 25% ( <i>p</i> : 1036, 1189) | 14% ( <i>p</i> : 1448)            | 8% ( <i>p</i> : 1626, 1747)      | 6% ( <i>p</i> : 1884)              | 3% ( <i>p</i> : 2104)         | 2% ( <i>p</i> : 2729)         |
| 2Jw                            | 223          | 1% ( <i>p</i> : 243)       | 20% ( <i>p</i> : 377, 435)    | 22% ( <i>p</i> : 519)    | 13% ( <i>p</i> : 578, 635)         | 22% ( <i>p</i> : 1015, 1155) | 11% ( <i>p</i> : 1427)            | 9% ( <i>p</i> : 1712)            | 1% ( <i>p</i> : 1862)              | -                             | -                             |
| 1Jw                            | 274          | 1% ( <i>p</i> : 168)       | 18% ( <i>p</i> : 404, 457)    | 5% ( <i>p</i> : 524)     | 10% ( <i>p</i> : 617)              | 35% ( <i>p</i> : 1053, 1160) | 16% ( <i>p</i> : 1432)            | 10% ( <i>p</i> : 1608, 1746)     | 4% ( <i>p</i> : 1805, 1854)        | -                             | 1% ( <i>p</i> : 2526)         |
| 1Jes                           | 193          | -                          | 10% ( <i>p</i> : 426, 453)    | -                        | -                                  | 77% ( <i>p</i> : 1053, 1160) | 13% ( <i>p</i> : 1316, 1480)      | -                                | -                                  | -                             | -                             |
| <b>F. Chukar Trail, CO</b>     |              |                            |                               |                          |                                    |                              |                                   |                                  |                                    |                               |                               |
| 2Jw                            | 220          | 5% ( <i>p</i> : 161, 252)  | 23% ( <i>p</i> : 367, 406)    | 1% ( <i>p</i> : 529)     | 6% ( <i>p</i> : 600)               | 31% ( <i>p</i> : 1042, 1183) | 16% ( <i>p</i> : 1440)            | 8% ( <i>p</i> : 1627, 1727)      | 5% ( <i>p</i> : 1803, 1879)        | 1% ( <i>p</i> : 2020)         | 3% ( <i>p</i> : 2689)         |
| 1Jes                           | 231          | 5% ( <i>p</i> : 166, 214)  | 16% ( <i>p</i> : 407, 447)    | 5% ( <i>p</i> : 524)     | 6% ( <i>p</i> : 609)               | 29% ( <i>p</i> : 1056, 1156) | 19% ( <i>p</i> : 1427, 1473)      | 13% ( <i>p</i> : 1664, 1730)     | 2% ( <i>p</i> : 1866)              | -                             | -                             |
| <b>G. Sawpit, CO</b>           |              |                            |                               |                          |                                    |                              |                                   |                                  |                                    |                               |                               |
| 1Jmt                           | 92           | 4% ( <i>p</i> : 232)       | 5% ( <i>p</i> : 412)          | 7% ( <i>p</i> : 526)     | 3% ( <i>p</i> : 608)               | 38% ( <i>p</i> : 1023, 1092) | 9% ( <i>p</i> : 1405)             | 14% ( <i>p</i> : 1636, 1713)     | 8% ( <i>p</i> : 1804, 1891)        | -                             | 11% ( <i>p</i> : 2640, 2700)  |
| 2Jw                            | 243          | 2% ( <i>p</i> : 257)       | 12% ( <i>p</i> : 379, 416)    | 22% ( <i>p</i> : 519)    | 6% ( <i>p</i> : 604)               | 30% ( <i>p</i> : 1032, 1155) | 16% ( <i>p</i> : 1411, 1451)      | 7% ( <i>p</i> : 1615)            | 3% ( <i>p</i> : 1958)              | 1% ( <i>p</i> : 2023)         | 1% ( <i>p</i> : 2685)         |
| 1Jw                            | 234          | 5% ( <i>p</i> : 164, 258)  | 14% ( <i>p</i> : 365, 417)    | -                        | 12% ( <i>p</i> : 596)              | 34% ( <i>p</i> : 1029, 1092) | 15% ( <i>p</i> : 1362, 1484)      | 8% ( <i>p</i> : 1639, 1784)      | 3% ( <i>p</i> : 1839)              | 3% ( <i>p</i> : 2094)         | 1% ( <i>p</i> : 2712)         |
| 2Jes                           | 177          | 7% ( <i>p</i> : 162, 243)  | 24% ( <i>p</i> : 371, 414)    | 7% ( <i>p</i> : 539)     | 7% ( <i>p</i> : 610)               | 23% ( <i>p</i> : 1064)       | 14% ( <i>p</i> : 1319, 1457)      | 7% ( <i>p</i> : 1653)            | 6% ( <i>p</i> : 1810)              | 2% ( <i>p</i> : 2094)         | 4% ( <i>p</i> : 2690)         |
| 1Jes                           | 226          | 4% ( <i>p</i> : 165, 209)  | 9% ( <i>p</i> : 361, 414)     | 4% ( <i>p</i> : 530)     | 9% ( <i>p</i> : 600)               | 35% ( <i>p</i> : 1053, 1132) | 13% ( <i>p</i> : 1327, 1455)      | 12% ( <i>p</i> : 1639, 1767)     | 5% ( <i>p</i> : 1869, 1983)        | 1% ( <i>p</i> : 2079)         | 2% ( <i>p</i> : 2608, 2679)   |

App. – Appalachian; SB – Suture Belt.  
UT – Utah; CO – Colorado; J – Jurassic; sv–Summerville Formation; eef, es–Entrada Sandstone; ebb = bb–board bed of the Entrada Sandstone; w–Wanakah Formation, mt–Tidwell and ms, sw–Salt Wash Members of the Morrison Formation.
